# Supplementary material for: An optimized multi-proxy, multi-site Antarctic ice and gas orbital chronology (AICC2012): 120–800 ka
Source: Copernicus journal article supplement (doi:10.5194/cp-9-1715-2013), 2013-08-01
Supplement: Supplementary file 1 [file AICC2012_agemarkers.xls]

## Sheet: Intro
AICC2012 Age markers
These age markers are used to construct the AICC2012 chronology for EDC, Vostok, EDML, TALDICE and NGRIP
The origin of the data is specified in the source column.
When using the AICC2012 chronology, please cite Bazin et al., 2013 and Veres et al., 2013
Bazin et al., 2013:
Bazin, L., Landais, A., Lemieux-Dudon, B., Toye Mahamadou Kele, H., Veres, D., Parrenin, F., Martinerie, P.,
Ritz, C., Capron, E., Lipenkov, V., Loutre, M.-F., Raynaud, D., Vinther, B., Svensson, A., Rasmussen, S.,
Severi, M., Blunier, T., Leuenberger, M., Fischer, H., Masson-Delmotte, V., Chappellaz, J., and Wolff, E.:
An optimized multi-proxies, multi-site Antarctic ice and gas orbital chronology (AICC2012): 120-800 ka,
Climate of the Past, 9, 1715-1731, doi:10.5194/cp-9-1715-2013, 2013.
Veres et al., 2013:
Veres, D., Bazin, L., Landais, A., Toye Mahamadou Kele,H., Lemieux-Dudon, B., Parrenin, F., Martinerie, P.,
Blayo, E., Blunier, T., Capron, E., Chappellaz, J., Rasmussen, S., Severi, M., Svensson, A., Vinther, B., and Wolff, E.: The
Antarctic ice core chronology (AICC2012): an optimized multi-parameter and multi-site dating approach
for the last 120 thousand years, Climate of the Past, 9, 1733-1748, doi:10.5194/cp-9-1733-2013, 2013.
References:
Bazin et al., 2013:
Bazin, L., Landais, A., Lemieux-Dudon, B., Toy«e Mahamadou Kele, H., Veres, D., Parrenin, F., Martinerie, P.,
Ritz, C., Capron, E., Lipenkov, V., Loutre, M.-F., Raynaud, D., Vinther, B., Svensson, A., Rasmussen, S.,
Severi, M., Blunier, T., Leuenberger, M., Fischer, H., Masson-Delmotte, V., Chappellaz, J., and Wolff, E.:
An optimized multi-proxies, multi-site Antarctic ice and gas orbital chronology (AICC2012): 120-800 ka,
Climate of the Past, 9, 1715-1731, doi:10.5194/cp-9-1715-2013, 2013.
Capron et al., 2010:
Capron, E., Landais, A., Lemieux-Dudon, B., Schilt, A., Masson-Delmotte, V., Buiron, D., Chappellaz, J.,
Dahl-Jensen, D., Johnsen, S., Leuenberger, M., Loulergue, L., and Oerter, H.: Synchronising EDML and
NorthGRIP ice cores using 18O of atmospheric oxygen (d18Oatm) and CH4 measurements over MIS5
(80-123 kyr), Quaternary Science Reviews, 29, 222–234, doi:10.1016/j.quascirev.2009.07.014, 2010.
Dreyfus et al., 2007:
Dreyfus, G. B., Parrenin, F., Lemieux-Dudon, B., Durand, G., Masson-Delmotte, V., Jouzel, J., Barnola, J.-M.,
Panno, L., Spahni, R., Tisserand, A., Siegenthaler, U., and Leuenberger, M.: Anomalous flow below 2700
m in the EPICA Dome C ice core detected using 18O of atmospheric oxygen measurements, Climate of the
Past, 3, 341–353, doi:10.5194/cp-3-341-2007, 2007.
Dreyfus et al., 2008:
Dreyfus, G. B., Raisbeck, G. M., Parrenin, F., Jouzel, J., Guyodo, Y., Nomade, S., and Mazaud, A.: An ice
core perspective on the age of the Matuyama-Brunhes boundary, Earth and Planetary Science Letters, 274,
151–156, doi:10.1016/j.epsl.2008.07.008, 2008.
Dunbar et al., 2008:
Dunbar, N.W., McIntosh, W. C., and Esser, R. P.: Physical setting and tephrochronology of the summit caldera
ice record at Mount Moulton, West Antarctica, Geological Society of America Bulletin, 120, 796–812, doi:
10.1130/B26140.1, 2008.
GICC05:
	Vinther et al., 2006:
	B.M. Vinther, H.B. Clausen, S.J. Johnsen, S.O. Rasmussen, K.K. Andersen, S.L. Buchardt,
	D. Dahl-Jensen, I.K. Seierstad, M.-L. Siggaard-Andersen, J.P. Steffensen, A.M. Svensson,
	J. Olsen, and J. Heinemeier
	A synchronized dating of three Greenland ice cores throughout the Holocene
	Journ. Geophys. Res., vol. 111, D13102, 2006, doi:10.1029/2005JD006921
	Rasmussen et al., 2006:
	S.O. Rasmussen, K.K. Andersen, A.M. Svensson, J.P. Steffensen, B.M. Vinther, H.B. Clausen,
	M.-L. Siggaard-Andersen, S.J. Johnsen, L.B. Larsen, D. Dahl-Jensen, M. Bigler, R. Röthlisberger,
	H. Fischer, K. Goto-Azuma, M.E. Hansson, and U. Ruth
	A new Greenland ice core chronology for the last glacial termination
	Journ. Geophys. Res., vol. 111, D06102, 2006, doi:10.1029/2005JD006079
	Andersen et al., 2006:
	K.K. Andersen, A. Svensson, S.J. Johnsen, S.O. Rasmussen, M. Bigler, R. Röthlisberger, U. Ruth,
	M.-L. Siggaard-Andersen, J.P. Steffensen, D. Dahl-Jensen, B.M. Vinther, and H.B. Clausen
	The Greenland Ice Core Chronology 2005, 15-42 ka. Part 1: Constructing the time scale
	Quaternary Science Reviews, vol. 25, Shackleton special issue 24, 2006
	Svensson et al., 2008:
	A. Svensson, K.K. Andersen, M. Bigler, H.B. Clausen, D. Dahl-Jensen, S.M. Davies, S.J. Johnsen,
	R. Muscheler, S.O. Rasmussen, R. Röthlisberger, I. Seierstad, J.P. Steffensen, and B.M. Vinther
	A 60,000 year Greenland stratigraphic ice core chronology
	Climate of the Past, 4, 47–57, doi: 10.5194/cp-4-47-2008, 2008.
Huber et al., 2006:
Huber, C., Beyerle, U., Leuenberger, M., Schwander, J., Kipfer, R., Spahni, R., Severinghaus, J. P., andWeiler,
K.: Evidence for molecular size dependent gas fractionation in firn air derived from noble gases, oxygen, and
nitrogen measurements, Earth and Planetary Science Letters, 243, 61–73, doi:10.1016/j.epsl.2005.12.036,
2006
Landais et al., 2004:
Landais, A., Barnola, J. M., Masson-Delmotte, V., Jouzel, J., Chappellaz, J., Caillon, N., Huber, C., Leuenberger,
M., and Johnsen, S. J.: A continuous record of temperature evolution over a sequence of Dansgaard-
Oeschger events during Marine Isotopic Stage 4 (76 to 62 kyr BP), Geophys. Res. Lett., 31, L22211, doi:
10.1029/2004GL021193, 2004.
landais et al., 2005:
Landais, A., Jouzel, J., Massondelmotte, V., and Caillon, N.: Large temperature variations over rapid climatic
events in Greenland: a method based on air isotopic measurements, Comptes Rendus Geoscience, 337, 947–
956, doi:10.1016/j.crte.2005.04.003, 2005.
Landais et al., 2012:
Landais, A., Dreyfus, G., Capron, E., Pol, K., Loutre, M. F., Raynaud, D., Lipenkov, V. Y., Arnaud, L., Masson-
Delmotte, V., Paillard, D., Jouzel, J., and Leuenberger, M.: Towards orbital dating of the EPICA Dome C
ice core using dO2/N2, Clim. Past, 8, 191–203, doi:http://dx.doi.org/10.5194/cp-8-191-201210.5194/cp-8-
191-2012, 2012.
Lipenkov et al., 2011:
Lipenkov, V. Y., Raynaud, D., Loutre, M. F., and Duval, P.: On the potential of coupling air content and O2=N2
from trapped air for establishing an ice core chronology tuned on local insolation, Quat. Sci. Rev., 30, 3280–
3289, doi:http://dx.doi.org/10.1016/j.quascirev.2011.07.01310.1016/j.quascirev.2011.07.013, 2011.
Narcisi et al., 2006:
Narcisi, B., Robert Petit, J., and Tiepolo, M.: A volcanic marker (92 ka) for dating deep east Antarctic ice cores,
Quaternary Science Reviews, 25, 2682–2687, doi:10.1016/j.quascirev.2006.07.009, 2006.
Raisbeck et al. 1987:
Raisbeck, G. M., Yiou, F., Bourles, D., Lorius, C., and Jouzel, J.: Evidence for two intervals of enhanced Be-
10 deposition in Antarctic ice during the last glacial period, Nature, 326, 273–277, doi:10.1038/326273a0,
1987
Raisbeck et al., 1998:
Raisbeck, G., Yiou, F., Bard, E., Dollfus, D., Jouzel, J., and Petit, J. R.: Absolute dating of the last 7000 years
of the Vostok ice core using 10Be, Mineral. Mag., 62A, 1228, 1998.
Raisbeck et al., 2006:
Raisbeck, G. M., Yiou, F., Cattani, O., and Jouzel, J.: 10Be evidence for the Matuyama-Brunhes geomagnetic
reversal in the EPICA Dome C ice core, Nature, 444, 82–84, doi:10.1038/nature05266, 2006.
Raisbeck et al., 2007:
Raisbeck, G. M., Yiou, F., Jouzel, J., and Stocker, T. F.: Direct north-south synchronization of abrupt climate
change record in ice cores using Beryllium 10, Clim. Past, 3, 541–547, doi:http://dx.doi.org/10.5194/cp-3-
541-200710.5194/cp-3-541-2007, 2007.
Raynaud et al., 2007:
Raynaud, D., Lipenkov, V., Lemieux-Dudon, B., Duval, P., Loutre, M.-F., and Lhomme, N.: The local insolation
signature of air content in Antarctic ice. A new step toward an absolute dating of ice records, Earth Planet.
Sci. Lett., 261, 337–349, doi:http://dx.doi.org/10.1016/j.epsl.2007.06.02510.1016/j.epsl.2007.06.025, 2007.
Singer et al., 2009:
Singer, B. S., Guillou, H., Jicha, B. R., Laj, C., Kissel, C., Beard, B. L., and Johnson, C. M.: 40Ar/39Ar,
K-Ar and 230Th-238U dating of the Laschamp excursion: A radioisotopic tie-point for ice core and climate
chronologies, Earth and Planetary Science Letters, 286, 80–88, doi:10.1016/j.epsl.2009.06.030, 2009.
Suwa et Bender 2008:
Suwa, M. and Bender, M. L.: Chronology of the Vostok ice core constrained by O2=N2 ratios of
occluded air, and its implication for the Vostok climate records, Quat. Sci. Rev., 27, 1093–1106,
doi:http://dx.doi.org/10.1016/j.quascirev.2008.02.01710.1016/j.quascirev.2008.02.017, 2008.
Yiou et al., 1997:
Yiou, F., Raisbeck, G. M., Baumgartner, S., Beer, J., Hammer, C., Johnsen, S., Jouzel, J., Kubik, P. W.,
Lestringuez, J., Sti´evenard, M., Suter, M., and Yiou, P.: Beryllium 10 in the Greenland Ice Core Project ice
core at Summit, Greenland, J. Geophys. Res., 102, 26 783–26 794, doi:10.1029/97JC01265, 1997.

## Sheet: Vostok
ice age markers:								gas age markers:
Depth (m)	Ice Age (a B1950)	Uncertainty (a)	Source					Depth (m)	Gas Age (a B1950)	Uncertainty (a)	Source
178	7180	100	Raisbeck et al., 1998					401.9	17500	6000	Suwa et Bender 2008
601	40650	950	Raisbeck et al. 1987, Yiou et al., 1997; Singer et al., 2009					540.2	30000	6000	Suwa et Bender 2008
1675	121800	4000	Suwa et Bender 2008					685	41800	6000	Suwa et Bender 2008
1853.7	132300	4000	Suwa et Bender 2008					829.9	53000	6000	Suwa et Bender 2008
2012.6	143900	4000	Suwa et Bender 2008					985.5	65500	6000	Suwa et Bender 2008
2103.9	157700	4000	Suwa et Bender 2008					1187.4	78200	6000	Suwa et Bender 2008
2200.2	170700	4000	Suwa et Bender 2008					1348.6	89700	6000	Suwa et Bender 2008
2321.1	181900	4000	Suwa et Bender 2008					1484.3	100400	6000	Suwa et Bender 2008
2420.28	191950	6663	Lipenkov et al., 2011					1602.4	110600	6000	Suwa et Bender 2008
2422.5	192300	4000	Suwa et Bender 2008					1764.6	121900	6000	Suwa et Bender 2008
2488.27	202950	6600	Lipenkov et al., 2011					1941.6	133500	6000	Suwa et Bender 2008
2512.8	203900	4000	Suwa et Bender 2008					2057.4	145400	6000	Suwa et Bender 2008
2602.3	215500	4000	Suwa et Bender 2008					2168.6	157300	6000	Suwa et Bender 2008
2668.3	226400	4000	Suwa et Bender 2008					2285.6	169600	6000	Suwa et Bender 2008
2715.6	236000	4000	Suwa et Bender 2008					2380.5	181500	6000	Suwa et Bender 2008
2780.6	246900	4000	Suwa et Bender 2008					2475.1	193300	6000	Suwa et Bender 2008
2829.7	260100	4000	Suwa et Bender 2008					2556.8	203900	6000	Suwa et Bender 2008
2848.45	260950	7215	Lipenkov et al., 2011					2642.2	214700	6000	Suwa et Bender 2008
2882.1	275200	4000	Suwa et Bender 2008					2701.2	225600	6000	Suwa et Bender 2008
2883.02	275950	6343	Lipenkov et al., 2011					2747.6	237100	6000	Suwa et Bender 2008
2912.1	286300	4000	Suwa et Bender 2008					2802	248200	6000	Suwa et Bender 2008
2962.7	296800	4000	Suwa et Bender 2008					2845	259300	6000	Suwa et Bender 2008
3005.6	307700	4000	Suwa et Bender 2008					2887	272900	6000	Suwa et Bender 2008
3011	307950	6424	Lipenkov et al., 2011					2947.6	285900	6000	Suwa et Bender 2008
3040.7	319200	4000	Suwa et Bender 2008					2990.3	297500	6000	Suwa et Bender 2008
3043.04	318950	6308	Lipenkov et al., 2011					3026.9	308300	6000	Suwa et Bender 2008
3080.5	330000	4000	Suwa et Bender 2008					3062.5	318300	6000	Suwa et Bender 2008
3130.6	339700	4000	Suwa et Bender 2008					3101.4	329000	6000	Suwa et Bender 2008
3145.95	346950	6527	Lipenkov et al., 2011					3146.2	340300	6000	Suwa et Bender 2008
3157.1	349200	4000	Suwa et Bender 2008					3173.8	351000	6000	Suwa et Bender 2008
3184.3	360000	4000	Suwa et Bender 2008					3191.9	359300	6000	Suwa et Bender 2008
3185.46	359950	6704	Lipenkov et al., 2011					3210.2	367500	6000	Suwa et Bender 2008
3199.9	369600	4000	Suwa et Bender 2008					3222.6	377200	6000	Suwa et Bender 2008
3210.1	375600	4000	Suwa et Bender 2008					3232.8	385400	6000	Suwa et Bender 2008
3224.3	384700	4000	Suwa et Bender 2008					3256.5	393500	6000	Suwa et Bender 2008
3239.4	395200	4000	Suwa et Bender 2008
3262.6	403600	4000	Suwa et Bender 2008

## Sheet: EDC
ice age markers:								gas age markers:
Depth (m)	Ice Age (a B1950)	Uncertainty (a)	Source					Depth (m)	Gas Age (a B1950)	Uncertainty (a)	Source
501.65	21950	2879	Raynaud et al., 2007					2644.44	363094	6000	Bazin et al., 2013
693.668	38950	2211	Raynaud et al., 2007					2697.23	389425	6000	Bazin et al., 2013
740.08	40650	950	Raisbeck et al., 2007; Singer et al., 2009					2708.24	398546	6000	Bazin et al., 2013
1255.93	86950	3082	Raynaud et al., 2007					2751.13	408283	6000	Bazin et al., 2013
1265.1	93200	4400	Narcisi et al., 2006; Dunbar et al., 2008					2777.54	427377	6000	Bazin et al., 2013
1377.67	100950	4031	Raynaud et al., 2007					2819.2	464557	6000	Dreyfus et al., 2007
1790.29	142950	6468	Raynaud et al., 2007					2829.36	474756	6000	Dreyfus et al., 2007
2086.69	202950	6403	Raynaud et al., 2007					2841.75	485293	6000	Dreyfus et al., 2007
2186.29	216950	6316	Raynaud et al., 2007					2856.27	495921	6000	Dreyfus et al., 2007
2307.2	245950	6316	Raynaud et al., 2007					2872.56	506642	6000	Dreyfus et al., 2007
2350.1	260950	6615	Raynaud et al., 2007					2890.33	517602	6000	Dreyfus et al., 2007
2500.25	306950	6652	Raynaud et al., 2007					2921.99	545313	6000	Dreyfus et al., 2007
2510.75	318950	6242	Raynaud et al., 2007					2938.24	556414	6000	Dreyfus et al., 2007
2610.8	346950	7120	Raynaud et al., 2007					2968.08	567606	6000	Dreyfus et al., 2007
2632.25	359950	6576	Raynaud et al., 2007					2998.96	578627	6000	Dreyfus et al., 2007
2783.5	424950	6782	Raynaud et al., 2007					3008.93	589460	6000	Dreyfus et al., 2007
2795.69	449000	4000	Landais et al., 2012					3017.25	600078	6000	Dreyfus et al., 2007
2808.33	460000	4000	Landais et al., 2012					3027.54	610875	6000	Dreyfus et al., 2007
2818.15	470000	4000	Landais et al., 2012					3035.41	622074	6000	Dreyfus et al., 2007
2829.13	480000	4000	Landais et al., 2012					3043.01	634419	6000	Dreyfus et al., 2007
2841.58	490000	4000	Landais et al., 2012					3048.51	649064	6000	Dreyfus et al., 2007
2858.78	501000	4000	Landais et al., 2012					3056.77	660789	6000	Dreyfus et al., 2007
2873.06	512000	4000	Landais et al., 2012					3065.93	671703	6000	Dreyfus et al., 2007
2888.95	522000	4000	Landais et al., 2012					3077.74	682326	6000	Dreyfus et al., 2007
2905.88	533000	4000	Landais et al., 2012					3093.51	693159	6000	Dreyfus et al., 2007
2919.62	551000	4000	Landais et al., 2012					3112.43	703964	6000	Dreyfus et al., 2007
2936.61	562000	4000	Landais et al., 2012					3119.57	714369	6000	Dreyfus et al., 2007
2975.52	573000	4000	Landais et al., 2012					3124.27	724376	6000	Dreyfus et al., 2007
2999.23	583000	4000	Landais et al., 2012					3136.18	733949	6000	Dreyfus et al., 2007
3009.36	594000	4000	Landais et al., 2012					3143.2	741944	6000	Dreyfus et al., 2007
3017.73	605000	4000	Landais et al., 2012					3152.25	749184	6000	Dreyfus et al., 2007
3028.6	616000	4000	Landais et al., 2012					3158.91	758069	6000	Dreyfus et al., 2007
3065.86	677000	4000	Landais et al., 2012					3166.87	767679	6000	Dreyfus et al., 2007
3078.05	688000	4000	Landais et al., 2012					3174.81	777607	6000	Dreyfus et al., 2007
3092.52	698000	4000	Landais et al., 2012					3180.6	787736	6000	Dreyfus et al., 2007
3109.93	710000	4000	Landais et al., 2012					3189.83	797460	6000	Dreyfus et al., 2007
3165.5	780300	10000	Raisbeck et al., 2006; Dreyfus et al., 2008
3169.32	778000	6000	Landais et al., 2012
3179.27	788000	6000	Landais et al., 2012
3183.5	798300	10000	Raisbeck et al., 2006; Dreyfus et al., 2008

## Sheet: EDML
No age markers

## Sheet: TALDICE
No age markers

## Sheet: NGRIP
ice age markers:						∆depth markers:
Depth (m)	Ice Age (a B1950)	Uncertainty (a)	Source			Depth (m)	∆depth (m)	Uncertainty (a)	Source:
46.95	110	0.25	GICC05			2099.9	16.29	2	Huber et al., 2006; Landais et al., 2004; landais et al., 2005; Capron et al., 2010
60.83	170	0.25	GICC05			2123.6	15.8	2	Huber et al., 2006; Landais et al., 2004; landais et al., 2005; Capron et al., 2010
73.6	230	0.25	GICC05			2157.1	15.56	2	Huber et al., 2006; Landais et al., 2004; landais et al., 2005; Capron et al., 2010
85.65	290	0.25	GICC05			2218.2	15.7	2	Huber et al., 2006; Landais et al., 2004; landais et al., 2005; Capron et al., 2010
97.43	350	0.25	GICC05			2255.6	12.85	2	Huber et al., 2006; Landais et al., 2004; landais et al., 2005; Capron et al., 2010
109.1	410	0.25	GICC05			2345.2	11.74	2	Huber et al., 2006; Landais et al., 2004; landais et al., 2005; Capron et al., 2010
120.43	470	0.25	GICC05			2364.5	12.36	2	Huber et al., 2006; Landais et al., 2004; landais et al., 2005; Capron et al., 2010
131.88	530	0.25	GICC05			2419.31	11.6	2	Huber et al., 2006; Landais et al., 2004; landais et al., 2005; Capron et al., 2010
143.18	590	0.25	GICC05			2465.1	8.85	2	Huber et al., 2006; Landais et al., 2004; landais et al., 2005; Capron et al., 2010
154.33	650	0.25	GICC05			2506.9	8.16	1.5	Huber et al., 2006; Landais et al., 2004; landais et al., 2005; Capron et al., 2010
165.13	710	0.25	GICC05			2577.8	7.66	1.5	Huber et al., 2006; Landais et al., 2004; landais et al., 2005; Capron et al., 2010
175.6	770	0.25	GICC05			2685.1	7.15	2	Huber et al., 2006; Landais et al., 2004; landais et al., 2005; Capron et al., 2010
186.55	830	0.25	GICC05			2890.2	5.54	2	Huber et al., 2006; Landais et al., 2004; landais et al., 2005; Capron et al., 2010
197.35	890	0.25	GICC05			2895.8	4.44	1.5	Huber et al., 2006; Landais et al., 2004; landais et al., 2005; Capron et al., 2010
207.85	950	0.25	GICC05			2936.5	7.8	1.5	Huber et al., 2006; Landais et al., 2004; landais et al., 2005; Capron et al., 2010
218.68	1010	0.25	GICC05
229.38	1070	0.25	GICC05
239.98	1130	0.25	GICC05
250.6	1190	0.25	GICC05
261.18	1250	0.5	GICC05
271.55	1310	0.5	GICC05
282.23	1370	0.5	GICC05
292.7	1430	0.5	GICC05
303.28	1490	0.25	GICC05
313.55	1550	0.25	GICC05
323.78	1610	0.25	GICC05
334.05	1670	0.25	GICC05
344.13	1730	0.25	GICC05
354.04	1790	0.25	GICC05
364.34	1850	0.25	GICC05
373.97	1910	0.25	GICC05
384.6	1970	0.25	GICC05
395.05	2030	0.25	GICC05
405.18	2090	0.25	GICC05
414.83	2150	0.25	GICC05
424.47	2210	0.25	GICC05
434.32	2270	0.25	GICC05
444.21	2330	0.5	GICC05
454.01	2390	0.5	GICC05
463.51	2450	0.5	GICC05
472.87	2510	0.5	GICC05
482.6	2570	0.5	GICC05
492.12	2630	0.5	GICC05
501.78	2690	0.75	GICC05
511.93	2750	0.75	GICC05
520.77	2810	0.75	GICC05
530.64	2870	0.75	GICC05
540.47	2930	0.75	GICC05
549.87	2990	0.75	GICC05
558.87	3050	0.75	GICC05
567.71	3110	1	GICC05
576.95	3170	1	GICC05
586.34	3230	1	GICC05
595.5	3290	1	GICC05
604.69	3350	1	GICC05
613.93	3410	1	GICC05
622.86	3470	1	GICC05
632.01	3530	1.25	GICC05
640.99	3590	1.25	GICC05
650	3650	1.25	GICC05
659.08	3710	1.25	GICC05
667.95	3770	1.25	GICC05
677.07	3830	1.25	GICC05
685.65	3890	1.5	GICC05
694.49	3950	1.5	GICC05
704.11	4010	1.5	GICC05
713.11	4070	1.75	GICC05
721.41	4130	1.75	GICC05
729.63	4190	1.75	GICC05
738.22	4250	2	GICC05
746.65	4310	2	GICC05
755.34	4370	2	GICC05
763.36	4430	2	GICC05
770.94	4490	2.25	GICC05
779.48	4550	2.25	GICC05
787.9	4610	2.25	GICC05
795.69	4670	2.5	GICC05
804.14	4730	2.5	GICC05
812.37	4790	2.5	GICC05
820.2	4850	2.75	GICC05
827.85	4910	2.75	GICC05
835.93	4970	2.75	GICC05
844.2	5030	2.75	GICC05
852.79	5090	3	GICC05
861.14	5150	3	GICC05
869.41	5210	3	GICC05
877.24	5270	3.25	GICC05
885.06	5330	3.25	GICC05
893	5390	3.25	GICC05
901.2	5450	3.5	GICC05
909.22	5510	3.5	GICC05
917.03	5570	3.5	GICC05
924.65	5630	3.5	GICC05
931.99	5690	3.75	GICC05
939.77	5750	3.75	GICC05
947.43	5810	3.75	GICC05
955.55	5870	4	GICC05
962.78	5930	4	GICC05
970.27	5990	4	GICC05
977.83	6050	4.25	GICC05
985.21	6110	4.25	GICC05
992.39	6170	4.25	GICC05
1000.34	6230	4.25	GICC05
1007.78	6290	4.5	GICC05
1015.62	6350	4.5	GICC05
1022.89	6410	4.5	GICC05
1029.94	6470	4.75	GICC05
1037.43	6530	4.75	GICC05
1044.88	6590	4.75	GICC05
1052.32	6650	5	GICC05
1060.01	6710	5	GICC05
1067.2	6770	5	GICC05
1074.49	6830	5	GICC05
1082.24	6890	5.25	GICC05
1088.77	6950	5.75	GICC05
1095.88	7010	6	GICC05
1103.61	7070	6.25	GICC05
1110.46	7130	6.5	GICC05
1117.64	7190	6.75	GICC05
1124.25	7250	7.25	GICC05
1131.51	7310	7.5	GICC05
1138.52	7370	7.75	GICC05
1145.4	7430	8	GICC05
1152.66	7490	8.25	GICC05
1159.81	7550	8.75	GICC05
1166.38	7610	9	GICC05
1173.11	7670	9.25	GICC05
1179.41	7730	9.5	GICC05
1186.97	7790	9.75	GICC05
1194.1	7850	10.25	GICC05
1200.51	7910	10.5	GICC05
1207.12	7970	10.75	GICC05
1213.51	8030	11	GICC05
1219.47	8090	11.25	GICC05
1225.46	8150	11.75	GICC05
1230.56	8210	12	GICC05
1237.16	8270	12.25	GICC05
1242.94	8330	12.5	GICC05
1248.7	8390	12.75	GICC05
1254.39	8450	13.25	GICC05
1260.45	8510	13.5	GICC05
1266.07	8570	13.75	GICC05
1271.79	8630	14	GICC05
1277.56	8690	14.5	GICC05
1283.04	8750	14.75	GICC05
1288.68	8810	15	GICC05
1294.04	8870	15.25	GICC05
1299.74	8930	15.5	GICC05
1305.08	8990	16	GICC05
1310.23	9050	16.25	GICC05
1315.62	9110	16.5	GICC05
1321.01	9170	16.75	GICC05
1326.11	9230	17	GICC05
1330.87	9290	17.5	GICC05
1336.18	9350	17.75	GICC05
1341.22	9410	18	GICC05
1346.41	9470	18.25	GICC05
1351.16	9530	18.5	GICC05
1356.13	9590	19	GICC05
1360.87	9650	19.25	GICC05
1365.83	9710	19.5	GICC05
1370.71	9770	19.75	GICC05
1375.15	9830	20.25	GICC05
1379.72	9890	20.5	GICC05
1384.34	9950	20.75	GICC05
1388.82	10010	21	GICC05
1393.18	10070	21.25	GICC05
1397.61	10130	21.75	GICC05
1402.07	10190	22	GICC05
1406.44	10250	22.25	GICC05
1410.77	10310	22.25	GICC05
1414.8	10370	22.5	GICC05
1418.84	10430	22.5	GICC05
1422.87	10490	22.5	GICC05
1426.93	10550	22.75	GICC05
1430.85	10610	22.75	GICC05
1434.84	10670	23	GICC05
1438.71	10730	23	GICC05
1442.44	10790	23.25	GICC05
1446.33	10850	23.25	GICC05
1449.92	10910	23.25	GICC05
1453.54	10970	23.5	GICC05
1457.18	11030	23.5	GICC05
1460.85	11090	23.75	GICC05
1464.37	11150	23.75	GICC05
1467.9	11210	23.75	GICC05
1471.51	11270	24	GICC05
1475.02	11330	24	GICC05
1478.16	11390	24.25	GICC05
1481.24	11450	24.25	GICC05
1484.59	11510	24.5	GICC05
1488.1	11570	24.5	GICC05
1491.45	11630	24.5	GICC05
1493.62	11690	25	GICC05
1495.43	11750	25.5	GICC05
1497.25	11810	26	GICC05
1498.93	11870	26.5	GICC05
1500.74	11930	27	GICC05
1502.51	11990	27.5	GICC05
1504.25	12050	28	GICC05
1505.87	12110	28.5	GICC05
1507.49	12170	28.75	GICC05
1509.2	12230	29.25	GICC05
1510.78	12290	29.75	GICC05
1512.41	12350	30.25	GICC05
1514.2	12410	30.75	GICC05
1515.84	12470	31.25	GICC05
1517.46	12530	31.75	GICC05
1518.9	12590	32.25	GICC05
1520.59	12650	32.75	GICC05
1522.36	12710	33.25	GICC05
1524.02	12770	33.75	GICC05
1525.94	12830	34.25	GICC05
1528.24	12890	34.75	GICC05
1530.73	12950	35	GICC05
1533.12	13010	35.5	GICC05
1535.21	13070	35.75	GICC05
1537.23	13130	36.25	GICC05
1539.37	13190	36.75	GICC05
1541.65	13250	37	GICC05
1544.2	13310	37.5	GICC05
1546.78	13370	37.75	GICC05
1549.46	13430	38.25	GICC05
1552.17	13490	38.75	GICC05
1554.75	13550	39	GICC05
1557.08	13610	39.5	GICC05
1559.72	13670	39.75	GICC05
1562.43	13730	40.25	GICC05
1565.2	13790	40.5	GICC05
1568.06	13850	41	GICC05
1570.75	13910	41.5	GICC05
1572.97	13970	41.75	GICC05
1575.03	14030	42.25	GICC05
1577.59	14090	42.5	GICC05
1580.19	14150	43	GICC05
1583.16	14210	43.5	GICC05
1586.22	14270	43.75	GICC05
1589.2	14330	44.25	GICC05
1592.08	14390	44.75	GICC05
1595.05	14450	45	GICC05
1598.32	14510	45.5	GICC05
1601.4	14570	46	GICC05
1604.17	14630	46.25	GICC05
1605.96	14690	47.25	GICC05
1607.68	14750	47.75	GICC05
1609.36	14810	48.25	GICC05
1610.9	14870	48.75	GICC05
1612.3	14930	49	GICC05
1613.72	14990	49.5	GICC05
1615.13	15050	50	GICC05
1616.39	15110	50	GICC05
1617.73	15170	50	GICC05
1619.12	15230	50	GICC05
1620.56	15290	50	GICC05
1621.92	15350	50	GICC05
1623.27	15410	50	GICC05
1624.71	15470	50	GICC05
1626.03	15530	50	GICC05
1627.34	15590	50	GICC05
1628.56	15650	50	GICC05
1629.81	15710	50	GICC05
1631.06	15770	50	GICC05
1632.52	15830	50	GICC05
1633.83	15890	50	GICC05
1635.26	15950	50	GICC05
1636.66	16010	50	GICC05
1637.99	16070	50	GICC05
1639.3	16130	50	GICC05
1640.66	16190	50	GICC05
1641.94	16250	50	GICC05
1643.27	16310	50	GICC05
1644.71	16370	50	GICC05
1646.11	16430	50	GICC05
1647.48	16490	50	GICC05
1648.75	16550	50	GICC05
1650.24	16610	50	GICC05
1651.66	16670	50	GICC05
1653.03	16730	50	GICC05
1654.49	16790	50	GICC05
1655.84	16850	50	GICC05
1657.11	16910	50	GICC05
1658.5	16970	50	GICC05
1659.92	17030	50	GICC05
1661.36	17090	50	GICC05
1662.8	17150	50	GICC05
1664.18	17210	50	GICC05
1665.49	17270	50	GICC05
1666.86	17330	50	GICC05
1668.19	17390	50	GICC05
1669.55	17450	50	GICC05
1670.8	17510	50	GICC05
1672.12	17570	50	GICC05
1673.63	17630	50	GICC05
1674.92	17690	50	GICC05
1676.27	17750	50	GICC05
1677.78	17810	50	GICC05
1679.16	17870	50	GICC05
1680.47	17930	50	GICC05
1681.82	17990	50	GICC05
1683.07	18050	50	GICC05
1684.55	18110	50	GICC05
1686.04	18170	50	GICC05
1687.35	18230	50	GICC05
1688.78	18290	50	GICC05
1690.04	18350	50	GICC05
1691.32	18410	50	GICC05
1692.67	18470	50	GICC05
1693.97	18530	50	GICC05
1695.36	18590	50	GICC05
1696.74	18650	50	GICC05
1698.13	18710	50	GICC05
1699.51	18770	50	GICC05
1700.94	18830	50	GICC05
1702.27	18890	50	GICC05
1703.56	18950	50	GICC05
1704.87	19010	50	GICC05
1706.18	19070	50	GICC05
1707.55	19130	50	GICC05
1708.82	19190	50	GICC05
1710.14	19250	50	GICC05
1711.47	19310	50	GICC05
1712.79	19370	50	GICC05
1714.18	19430	50	GICC05
1715.54	19490	50	GICC05
1716.99	19550	50	GICC05
1718.29	19610	50	GICC05
1719.51	19670	50	GICC05
1720.73	19730	50	GICC05
1722.09	19790	50	GICC05
1723.44	19850	50	GICC05
1724.81	19910	50	GICC05
1726.07	19970	50	GICC05
1727.42	20030	50	GICC05
1728.67	20090	50	GICC05
1730.04	20150	50	GICC05
1731.47	20210	50	GICC05
1732.92	20270	50	GICC05
1734.14	20330	50	GICC05
1735.43	20390	50	GICC05
1736.75	20450	50	GICC05
1738.09	20510	50	GICC05
1739.44	20570	50	GICC05
1740.77	20630	50	GICC05
1741.97	20690	50	GICC05
1743.32	20750	50	GICC05
1744.54	20810	50	GICC05
1745.74	20870	50	GICC05
1746.92	20930	50	GICC05
1748.07	20990	50	GICC05
1749.18	21050	50	GICC05
1750.29	21110	50	GICC05
1751.5	21170	50	GICC05
1752.71	21230	50	GICC05
1753.85	21290	50	GICC05
1755	21350	50	GICC05
1756.14	21410	50	GICC05
1757.26	21470	50	GICC05
1758.4	21530	50	GICC05
1759.55	21590	50	GICC05
1760.62	21650	50	GICC05
1761.8	21710	50	GICC05
1762.91	21770	50	GICC05
1764.07	21830	50	GICC05
1765.26	21890	50	GICC05
1766.36	21950	50	GICC05
1767.43	22010	50	GICC05
1768.5	22070	50	GICC05
1769.61	22130	50	GICC05
1770.73	22190	50	GICC05
1771.81	22250	50	GICC05
1772.95	22310	50	GICC05
1774.12	22370	50	GICC05
1775.33	22430	50	GICC05
1776.59	22490	50	GICC05
1777.75	22550	50	GICC05
1778.9	22610	50	GICC05
1780.04	22670	50	GICC05
1781.31	22730	50	GICC05
1782.46	22790	50	GICC05
1783.62	22850	50	GICC05
1784.96	22910	50	GICC05
1786.28	22970	50	GICC05
1787.52	23030	50	GICC05
1788.78	23090	50	GICC05
1789.92	23150	50	GICC05
1791.16	23210	50	GICC05
1792.62	23270	50	GICC05
1794.08	23330	50	GICC05
1795.27	23390	50	GICC05
1796.35	23450	50	GICC05
1797.36	23510	50	GICC05
1798.4	23570	50	GICC05
1799.34	23630	50	GICC05
1800.31	23690	50	GICC05
1801.27	23750	50	GICC05
1802.21	23810	50	GICC05
1803.16	23870	50	GICC05
1804.06	23930	50	GICC05
1804.94	23990	50	GICC05
1805.87	24050	50	GICC05
1806.81	24110	50	GICC05
1807.74	24170	50	GICC05
1808.74	24230	50	GICC05
1809.73	24290	50	GICC05
1810.72	24350	50	GICC05
1811.69	24410	50	GICC05
1812.7	24470	50	GICC05
1813.57	24530	50	GICC05
1814.49	24590	50	GICC05
1815.37	24650	50	GICC05
1816.3	24710	50	GICC05
1817.14	24770	50	GICC05
1818.11	24830	50	GICC05
1819.1	24890	50	GICC05
1820.06	24950	50	GICC05
1821.11	25010	50	GICC05
1822.06	25070	50	GICC05
1823	25130	50	GICC05
1823.88	25190	50	GICC05
1824.74	25250	50	GICC05
1825.67	25310	50	GICC05
1826.6	25370	50	GICC05
1827.49	25430	50	GICC05
1828.35	25490	50	GICC05
1829.24	25550	50	GICC05
1830.13	25610	50	GICC05
1830.99	25670	50	GICC05
1831.89	25730	50	GICC05
1832.79	25790	50	GICC05
1833.64	25850	50	GICC05
1834.53	25910	50	GICC05
1835.45	25970	50	GICC05
1836.53	26030	50	GICC05
1837.5	26090	50	GICC05
1838.64	26150	50	GICC05
1839.83	26210	50	GICC05
1840.92	26270	50	GICC05
1841.99	26330	50	GICC05
1842.98	26390	50	GICC05
1844.13	26450	50	GICC05
1845.05	26510	50	GICC05
1846.02	26570	50	GICC05
1847	26630	50	GICC05
1848	26690	50	GICC05
1849.04	26750	50	GICC05
1850.04	26810	50	GICC05
1851.08	26870	50	GICC05
1852.17	26930	50	GICC05
1853.15	26990	50	GICC05
1854.21	27050	50	GICC05
1855.2	27110	50	GICC05
1856.18	27170	50	GICC05
1857.23	27230	50	GICC05
1858.23	27290	50	GICC05
1859.24	27350	50	GICC05
1860.22	27410	50	GICC05
1861.22	27470	50	GICC05
1862.75	27530	50	GICC05
1864.58	27590	50	GICC05
1866.38	27650	50	GICC05
1868.43	27710	50	GICC05
1869.9	27770	50	GICC05
1870.85	27830	50	GICC05
1871.82	27890	50	GICC05
1872.81	27950	50	GICC05
1873.77	28010	50	GICC05
1874.69	28070	50	GICC05
1875.58	28130	50	GICC05
1876.5	28190	50	GICC05
1877.47	28250	50	GICC05
1878.44	28310	50	GICC05
1879.38	28370	50	GICC05
1880.45	28430	50	GICC05
1881.49	28490	50	GICC05
1882.62	28550	50	GICC05
1884.17	28610	50	GICC05
1885.91	28670	50	GICC05
1887.77	28730	50	GICC05
1889.79	28790	50	GICC05
1891.57	28850	50	GICC05
1892.65	28910	50	GICC05
1893.6	28970	50	GICC05
1894.52	29030	50	GICC05
1895.35	29090	50	GICC05
1896.2	29150	50	GICC05
1897.05	29210	50	GICC05
1897.89	29270	50	GICC05
1898.78	29330	50	GICC05
1899.61	29390	50	GICC05
1900.4	29450	50	GICC05
1901.16	29510	50	GICC05
1902.06	29570	50	GICC05
1902.87	29630	50	GICC05
1903.67	29690	50	GICC05
1904.57	29750	50	GICC05
1905.42	29810	50	GICC05
1906.28	29870	50	GICC05
1907.22	29930	50	GICC05
1908.09	29990	50	GICC05
1908.95	30050	50	GICC05
1909.77	30110	50	GICC05
1910.63	30170	50	GICC05
1911.46	30230	50	GICC05
1912.33	30290	50	GICC05
1913.19	30350	50	GICC05
1913.92	30410	50	GICC05
1914.78	30470	50	GICC05
1915.75	30530	50	GICC05
1916.77	30590	50	GICC05
1917.81	30650	50	GICC05
1919.11	30710	50	GICC05
1920.21	30770	50	GICC05
1921.27	30830	50	GICC05
1922.22	30890	50	GICC05
1923.16	30950	50	GICC05
1924.13	31010	50	GICC05
1925.11	31070	50	GICC05
1926.08	31130	50	GICC05
1926.96	31190	50	GICC05
1927.94	31250	50	GICC05
1928.83	31310	50	GICC05
1929.77	31370	50	GICC05
1930.66	31430	50	GICC05
1931.55	31490	50	GICC05
1932.51	31550	50	GICC05
1933.48	31610	50	GICC05
1934.47	31670	50	GICC05
1935.46	31730	50	GICC05
1936.42	31790	50	GICC05
1937.36	31850	50	GICC05
1938.28	31910	50	GICC05
1939.32	31970	50	GICC05
1940.48	32030	50	GICC05
1941.84	32090	50	GICC05
1943.31	32150	50	GICC05
1944.73	32210	50	GICC05
1946.41	32270	50	GICC05
1948.01	32330	50	GICC05
1949.79	32390	50	GICC05
1951.65	32450	50	GICC05
1952.71	32510	50	GICC05
1953.58	32570	50	GICC05
1954.58	32630	50	GICC05
1955.38	32690	50	GICC05
1956.25	32750	50	GICC05
1957.11	32810	50	GICC05
1958.02	32870	50	GICC05
1958.85	32930	50	GICC05
1959.76	32990	50	GICC05
1960.55	33050	50	GICC05
1961.35	33110	50	GICC05
1962.23	33170	50	GICC05
1963.03	33230	50	GICC05
1963.95	33290	50	GICC05
1965.14	33350	50	GICC05
1966.73	33410	50	GICC05
1968.38	33470	50	GICC05
1970.1	33530	50	GICC05
1971.75	33590	50	GICC05
1973.59	33650	50	GICC05
1974.91	33710	50	GICC05
1975.97	33770	50	GICC05
1977	33830	50	GICC05
1977.99	33890	50	GICC05
1978.9	33950	50	GICC05
1979.86	34010	50	GICC05
1980.7	34070	50	GICC05
1981.63	34130	50	GICC05
1982.55	34190	50	GICC05
1983.48	34250	50	GICC05
1984.38	34310	50	GICC05
1985.31	34370	50	GICC05
1986.32	34430	50	GICC05
1987.14	34490	50	GICC05
1988	34550	50	GICC05
1988.88	34610	50	GICC05
1989.94	34670	50	GICC05
1991.25	34730	50	GICC05
1992.79	34790	50	GICC05
1994.21	34850	50	GICC05
1995.66	34910	50	GICC05
1997.04	34970	50	GICC05
1998.5	35030	50	GICC05
2000.08	35090	50	GICC05
2001.7	35150	50	GICC05
2003.34	35210	50	GICC05
2005	35270	50	GICC05
2006.65	35330	50	GICC05
2008.32	35390	50	GICC05
2009.93	35450	50	GICC05
2011.04	35510	50	GICC05
2011.94	35570	50	GICC05
2012.82	35630	50	GICC05
2013.71	35690	50	GICC05
2014.58	35750	50	GICC05
2015.47	35810	50	GICC05
2016.33	35870	50	GICC05
2017.22	35930	50	GICC05
2018.1	35990	50	GICC05
2018.98	36050	50	GICC05
2019.82	36110	50	GICC05
2020.7	36170	50	GICC05
2021.63	36230	50	GICC05
2022.54	36290	50	GICC05
2023.5	36350	50	GICC05
2024.53	36410	50	GICC05
2025.71	36470	50	GICC05
2026.66	36530	50	GICC05
2027.78	36590	50	GICC05
2029.03	36650	50	GICC05
2030.34	36710	50	GICC05
2031.65	36770	50	GICC05
2033.18	36830	50	GICC05
2034.33	36890	50	GICC05
2035.62	36950	50	GICC05
2036.96	37010	50	GICC05
2038.23	37070	50	GICC05
2039.68	37130	50	GICC05
2041.31	37190	50	GICC05
2042.92	37250	50	GICC05
2044.54	37310	50	GICC05
2046.08	37370	50	GICC05
2047.79	37430	50	GICC05
2049.53	37490	50	GICC05
2051.29	37550	50	GICC05
2053.04	37610	50	GICC05
2054.86	37670	50	GICC05
2056.53	37730	50	GICC05
2058.28	37790	50	GICC05
2060.05	37850	50	GICC05
2061.84	37910	50	GICC05
2063.68	37970	50	GICC05
2065.63	38030	50	GICC05
2067.6	38090	50	GICC05
2069.5	38150	50	GICC05
2070.71	38210	50	GICC05
2071.7	38270	50	GICC05
2072.7	38330	50	GICC05
2073.59	38390	50	GICC05
2074.52	38450	50	GICC05
2075.39	38510	50	GICC05
2076.3	38570	50	GICC05
2077.2	38630	50	GICC05
2078.08	38690	50	GICC05
2079.03	38750	50	GICC05
2079.88	38810	50	GICC05
2080.75	38870	50	GICC05
2081.76	38930	50	GICC05
2082.69	38990	50	GICC05
2083.51	39050	50	GICC05
2084.36	39110	50	GICC05
2085.23	39170	50	GICC05
2086.09	39230	50	GICC05
2086.93	39290	50	GICC05
2087.84	39350	50	GICC05
2088.7	39410	50	GICC05
2089.47	39470	50	GICC05
2090.3	39530	50	GICC05
2091.15	39590	50	GICC05
2091.94	39650	50	GICC05
2092.72	39710	50	GICC05
2093.49	39770	50	GICC05
2094.31	39830	50	GICC05
2095.27	39890	50	GICC05
2096.31	39950	50	GICC05
2097.56	40010	50	GICC05
2098.85	40070	50	GICC05
2099.97	40130	50	GICC05
2100.97	40190	50	GICC05
2101.93	40250	50	GICC05
2102.93	40310	50	GICC05
2103.87	40370	50	GICC05
2104.73	40430	50	GICC05
2105.67	40490	50	GICC05
2106.57	40550	50	GICC05
2107.54	40610	50	GICC05
2108.43	40670	50	GICC05
2109.4	40730	50	GICC05
2110.34	40790	50	GICC05
2111.37	40850	50	GICC05
2112.38	40910	50	GICC05
2113.62	40970	50	GICC05
2114.79	41030	50	GICC05
2116.07	41090	50	GICC05
2117.49	41150	50	GICC05
2118.92	41210	50	GICC05
2120.41	41270	50	GICC05
2121.89	41330	50	GICC05
2123.6	41390	50	GICC05
2124.72	41450	50	GICC05
2125.67	41510	50	GICC05
2126.48	41570	50	GICC05
2127.35	41630	50	GICC05
2128.2	41690	50	GICC05
2129.02	41750	50	GICC05
2129.85	41810	50	GICC05
2130.64	41870	50	GICC05
2131.46	41930	50	GICC05
2132.25	41990	50	GICC05
2133.12	42050	50	GICC05
2133.91	42110	50	GICC05
2134.71	42170	50	GICC05
2135.63	42230	50	GICC05
2136.71	42290	50	GICC05
2137.75	42350	50	GICC05
2138.83	42410	50	GICC05
2139.88	42470	50	GICC05
2140.97	42530	50	GICC05
2142.05	42590	50	GICC05
2143.14	42650	50	GICC05
2144.24	42710	50	GICC05
2145.33	42770	50	GICC05
2146.66	42830	50	GICC05
2148.01	42890	50	GICC05
2149.35	42950	50	GICC05
2150.74	43010	50	GICC05
2152.19	43070	50	GICC05
2153.67	43130	50	GICC05
2155.1	43190	50	GICC05
2156.58	43250	50	GICC05
2157.79	43310	50	GICC05
2158.61	43370	50	GICC05
2159.46	43430	50	GICC05
2160.23	43490	50	GICC05
2160.97	43550	50	GICC05
2161.74	43610	50	GICC05
2162.52	43670	50	GICC05
2163.31	43730	50	GICC05
2164.09	43790	50	GICC05
2164.9	43850	50	GICC05
2165.7	43910	50	GICC05
2166.5	43970	50	GICC05
2167.26	44030	50	GICC05
2168.04	44090	50	GICC05
2168.83	44150	50	GICC05
2169.72	44210	50	GICC05
2170.59	44270	50	GICC05
2171.53	44330	50	GICC05
2172.59	44390	50	GICC05
2173.77	44450	50	GICC05
2174.8	44510	50	GICC05
2175.75	44570	50	GICC05
2176.61	44630	50	GICC05
2177.62	44690	50	GICC05
2178.59	44750	50	GICC05
2179.58	44810	50	GICC05
2180.55	44870	50	GICC05
2181.54	44930	50	GICC05
2182.58	44990	50	GICC05
2183.63	45050	50	GICC05
2184.73	45110	50	GICC05
2185.69	45170	50	GICC05
2186.71	45230	50	GICC05
2187.77	45290	50	GICC05
2188.83	45350	50	GICC05
2189.99	45410	50	GICC05
2191.24	45470	50	GICC05
2192.49	45530	50	GICC05
2193.77	45590	50	GICC05
2195.01	45650	50	GICC05
2196.28	45710	50	GICC05
2197.67	45770	50	GICC05
2198.99	45830	50	GICC05
2200.27	45890	50	GICC05
2201.51	45950	50	GICC05
2202.84	46010	50	GICC05
2204.23	46070	50	GICC05
2205.68	46130	50	GICC05
2207.05	46190	50	GICC05
2208.41	46250	50	GICC05
2209.81	46310	50	GICC05
2211.23	46370	50	GICC05
2212.61	46430	50	GICC05
2213.92	46490	50	GICC05
2215.43	46550	50	GICC05
2217.02	46610	50	GICC05
2218.67	46670	50	GICC05
2220.26	46730	50	GICC05
2221.89	46790	50	GICC05
2222.9	46850	50	GICC05
2223.79	46910	50	GICC05
2224.58	46970	50	GICC05
2225.41	47030	50	GICC05
2226.2	47090	50	GICC05
2227.03	47150	50	GICC05
2227.82	47210	50	GICC05
2228.66	47270	50	GICC05
2229.43	47330	50	GICC05
2230.18	47390	50	GICC05
2230.96	47450	50	GICC05
2231.69	47510	50	GICC05
2232.43	47570	50	GICC05
2233.18	47630	50	GICC05
2233.88	47690	50	GICC05
2234.64	47750	50	GICC05
2235.42	47810	50	GICC05
2236.1	47870	50	GICC05
2236.8	47930	50	GICC05
2237.49	47990	50	GICC05
2238.17	48050	50	GICC05
2238.85	48110	50	GICC05
2239.53	48170	50	GICC05
2240.24	48230	50	GICC05
2240.96	48290	50	GICC05
2241.72	48350	50	GICC05
2242.43	48410	50	GICC05
2243.31	48470	50	GICC05
2244.26	48530	50	GICC05
2245.23	48590	50	GICC05
2246.12	48650	50	GICC05
2247.12	48710	50	GICC05
2248.15	48770	50	GICC05
2249.2	48830	50	GICC05
2250.36	48890	50	GICC05
2251.61	48950	50	GICC05
2252.8	49010	50	GICC05
2253.84	49070	50	GICC05
2254.96	49130	50	GICC05
2256.12	49190	50	GICC05
2257.26	49250	50	GICC05
2258.15	49310	50	GICC05
2258.96	49370	50	GICC05
2259.76	49430	50	GICC05
2260.62	49490	50	GICC05
2261.46	49550	50	GICC05
2262.39	49610	50	GICC05
2263.35	49670	50	GICC05
2264.34	49730	50	GICC05
2265.35	49790	50	GICC05
2266.38	49850	50	GICC05
2267.32	49910	50	GICC05
2268.29	49970	50	GICC05
2269.24	50030	50	GICC05
2270.23	50090	50	GICC05
2271.22	50150	50	GICC05
2272.19	50210	50	GICC05
2273.17	50270	50	GICC05
2274.13	50330	50	GICC05
2275.19	50390	50	GICC05
2276.17	50450	50	GICC05
2277.2	50510	50	GICC05
2278.25	50570	50	GICC05
2279.25	50630	50	GICC05
2280.3	50690	50	GICC05
2281.31	50750	50	GICC05
2282.31	50810	50	GICC05
2283.33	50870	50	GICC05
2284.35	50930	50	GICC05
2285.36	50990	50	GICC05
2286.45	51050	50	GICC05
2287.44	51110	50	GICC05
2288.49	51170	50	GICC05
2289.5	51230	50	GICC05
2290.55	51290	50	GICC05
2291.62	51350	50	GICC05
2292.62	51410	50	GICC05
2293.57	51470	50	GICC05
2294.61	51530	50	GICC05
2295.57	51590	50	GICC05
2296.59	51650	50	GICC05
2297.74	51710	50	GICC05
2298.84	51770	50	GICC05
2299.99	51830	50	GICC05
2301.11	51890	50	GICC05
2302.2	51950	50	GICC05
2303.28	52010	50	GICC05
2304.27	52070	50	GICC05
2305.35	52130	50	GICC05
2306.45	52190	50	GICC05
2307.57	52250	50	GICC05
2308.72	52310	50	GICC05
2309.8	52370	50	GICC05
2310.99	52430	50	GICC05
2312.19	52490	50	GICC05
2313.35	52550	50	GICC05
2314.5	52610	50	GICC05
2315.7	52670	50	GICC05
2316.84	52730	50	GICC05
2318.06	52790	50	GICC05
2319.22	52850	50	GICC05
2320.39	52910	50	GICC05
2321.54	52970	50	GICC05
2322.68	53030	50	GICC05
2323.85	53090	50	GICC05
2324.99	53150	50	GICC05
2326.12	53210	50	GICC05
2327.32	53270	50	GICC05
2328.52	53330	50	GICC05
2329.77	53390	50	GICC05
2330.98	53450	50	GICC05
2332.19	53510	50	GICC05
2333.45	53570	50	GICC05
2334.69	53630	50	GICC05
2335.85	53690	50	GICC05
2337.05	53750	50	GICC05
2338.31	53810	50	GICC05
2339.62	53870	50	GICC05
2340.73	53930	50	GICC05
2341.78	53990	50	GICC05
2343.06	54050	50	GICC05
2344.25	54110	50	GICC05
2345.52	54170	50	GICC05
2346.31	54230	50	GICC05
2347.09	54290	50	GICC05
2347.85	54350	50	GICC05
2348.52	54410	50	GICC05
2349.2	54470	50	GICC05
2349.88	54530	50	GICC05
2350.57	54590	50	GICC05
2351.24	54650	50	GICC05
2351.89	54710	50	GICC05
2352.63	54770	50	GICC05
2353.38	54830	50	GICC05
2354.29	54890	50	GICC05
2355.34	54950	50	GICC05
2356.09	55010	50	GICC05
2356.7	55070	50	GICC05
2357.31	55130	50	GICC05
2357.93	55190	50	GICC05
2358.56	55250	50	GICC05
2359.2	55310	50	GICC05
2359.93	55370	50	GICC05
2360.91	55430	50	GICC05
2361.88	55490	50	GICC05
2362.86	55550	50	GICC05
2364.01	55610	50	GICC05
2365.12	55670	50	GICC05
2366.06	55730	50	GICC05
2366.83	55790	50	GICC05
2367.51	55850	50	GICC05
2368.16	55910	50	GICC05
2368.83	55970	50	GICC05
2369.5	56030	50	GICC05
2370.14	56090	50	GICC05
2370.83	56150	50	GICC05
2371.5	56210	50	GICC05
2372.22	56270	50	GICC05
2372.88	56330	50	GICC05
2373.62	56390	50	GICC05
2374.41	56450	50	GICC05
2375.21	56510	50	GICC05
2376.08	56570	50	GICC05
2377	56630	50	GICC05
2377.97	56690	50	GICC05
2378.95	56750	50	GICC05
2379.82	56810	50	GICC05
2380.74	56870	50	GICC05
2381.61	56930	50	GICC05
2382.49	56990	50	GICC05
2383.42	57050	50	GICC05
2384.33	57110	50	GICC05
2385.22	57170	50	GICC05
2386.16	57230	50	GICC05
2387.04	57290	50	GICC05
2387.96	57350	50	GICC05
2388.88	57410	50	GICC05
2389.81	57470	50	GICC05
2390.74	57530	50	GICC05
2391.79	57590	50	GICC05
2392.8	57650	50	GICC05
2393.79	57710	50	GICC05
2394.9	57770	50	GICC05
2396.09	57830	50	GICC05
2397.08	57890	50	GICC05
2398.03	57950	50	GICC05
2399.05	58010	50	GICC05
2399.8	58070	50	GICC05
2400.66	58130	50	GICC05
2401.88	58190	50	GICC05
2402.87	58250	50	GICC05
2403.66	58310	50	GICC05
2404.37	58370	50	GICC05
2405.07	58430	50	GICC05
2405.73	58490	50	GICC05
2406.62	58550	50	GICC05
2407.59	58610	50	GICC05
2408.74	58670	50	GICC05
2409.78	58730	50	GICC05
2410.65	58790	50	GICC05
2411.65	58850	50	GICC05
2412.76	58910	50	GICC05
2413.89	58970	50	GICC05
2415.01	59030	50	GICC05
2415.78	59090	50	GICC05
2416.48	59150	50	GICC05
2417.17	59210	50	GICC05
2417.95	59270	50	GICC05
2419.2	59330	50	GICC05
2420.44	59390	50	GICC05
