# Supplementary material for: An optimized multi-proxy, multi-site Antarctic ice and gas orbital chronology (AICC2012): 120–800 ka
Source: Copernicus journal article supplement (doi:10.5194/cp-9-1715-2013), 2013-08-01
Supplement: Supplementary file 2 [file AICC2012_gas_stratigraphic_links.xls]

## Sheet: Intro
AICC2012 Gas stratigraphic links
These gas stratigraphic links are used to construct the AICC2012 chronology for EDC, Vostok, EDML, TALDICE and NGRIP
The origin of the data is specified in the source column.
For more description on data and uncertainty determination please refer to the original paper.
When using the AICC2012 chronology, please cite Bazin et al., 2013 and Veres et al., 2013
Bazin et al., 2013:
Bazin, L., Landais, A., Lemieux-Dudon, B., Toye Mahamadou Kele, H., Veres, D., Parrenin, F., Martinerie, P.,
Ritz, C., Capron, E., Lipenkov, V., Loutre, M.-F., Raynaud, D., Vinther, B., Svensson, A., Rasmussen, S.,
Severi, M., Blunier, T., Leuenberger, M., Fischer, H., Masson-Delmotte, V., Chappellaz, J., and Wolff, E.:
An optimized multi-proxies, multi-site Antarctic ice and gas orbital chronology (AICC2012): 120-800 ka,
Climate of the Past, 9, 1715-1731, doi:10.5194/cp-9-1715-2013, 2013.
Veres et al., 2013:
Veres, D., Bazin, L., Landais, A., Toye Mahamadou Kele,H., Lemieux-Dudon, B., Parrenin, F., Martinerie, P.,
Blayo, E., Blunier, T., Capron, E., Chappellaz, J., Rasmussen, S., Severi, M., Svensson, A., Vinther, B., and Wolff, E.: The
Antarctic ice core chronology (AICC2012): an optimized multi-parameter and multi-site dating approach
for the last 120 thousand years, Climate of the Past, 9, 1733-1748, doi:10.5194/cp-9-1733-2013, 2013.
References:
Bazin et al., 2013:
Bazin, L., Landais, A., Lemieux-Dudon, B., Toy«e Mahamadou Kele, H., Veres, D., Parrenin, F., Martinerie, P.,
Ritz, C., Capron, E., Lipenkov, V., Loutre, M.-F., Raynaud, D., Vinther, B., Svensson, A., Rasmussen, S.,
Severi, M., Blunier, T., Leuenberger, M., Fischer, H., Masson-Delmotte, V., Chappellaz, J., and Wolff, E.:
An optimized multi-proxies, multi-site Antarctic ice and gas orbital chronology (AICC2012): 120-800 ka,
Climate of the Past, 9, 1715-1731, doi:10.5194/cp-9-1715-2013, 2013.
Buiron et al., 2011:
Buiron, D., Chappellaz, J., Stenni, B., Frezzotti, M., Baumgartner, M., Capron, E., Landais, A.,
Lemieux-Dudon, B., Masson-Delmotte, V., Montagnat, M., Parrenin, F., and Schilt, A.:
TALDICE-1 age scale of the Talos Dome deep ice core, East Antarctica, Clim. Past, 7, 1-16, doi:10.5194/cp-7-1-2011, 2011.
Capron et al., 2010:
Capron, E., Landais, A., Lemieux-Dudon, B., Schilt, A., Masson- Delmotte, V., Buiron, D.,
Chappellaz, J., Dahl-Jensen, D., Johnsen, S., Leuenberger, M., Loulergue, L., and Oerter, H.:
Synchronising EDML and NorthGRIP ice cores using δ18O of atmospheric oxygen (δ18Oatm) and CH4
measurements over MIS5 (80–123 kyr), Quaternary Sci. Rev., 29, 222–234, doi:10.1016/j.quascirev.2009.07.014, 2010.
Landais et al., 2006:
Landais, A., C. Waelbroeck, and V. Masson-Delmotte (2006), On the limits of Antarctic and
marine climate records synchronization: Lag estimates during marine isotopic stages 5d and 5c,
Paleoceanography, 21, PA1001, doi:10.1029/2005PA001171.
Lemieux-Dudon et al, 2010:
Lemieux-Dudon, B., Blayo, E., Petit, J.-R., Waelbroeck, C., Svens- son, A., Ritz, C., Barnola, J.-M.,
Narcisi, B. M., and Parrenin, F.: Consistent dating for Antarctic and Greenland ice cores,
Quater- nary Sci. Rev., 29, 8–20, doi:10.1016/j.quascirev.2009.11.010, 2010.
loulergue et al., 2007:
Loulergue, L., Parrenin, F., Blunier, T., Barnola, J.-M., Spahni, R., Schilt, A., Raisbeck, G., and Chappellaz, J.:
New constraints on the gas age-ice age difference along the EPICA ice cores, 0-50 kyr, Climate of the Past,
3, 527–540, 2007.
PHD loulergue:
Loulergue, L.: Contraintes chronologiques et biogeochimiques grace au methane dans la glace naturelle : une
application aux forages du projet EPICA, 2007, Ph.D. thesis, UJF, France, 2007.
Schilt at al., 2010:
Schilt, A., Baumgartner, M., Blunier, T., Schwander, J., Spahni, R., Fischer, H., and Stocker, T. F.:
Glacial-interglacial and millennial-scale variations in the atmospheric nitrous oxide concentration
during the last 800,000 years , Quaternary Sci. Rev., 29, 182–192, doi:10.1016/j.quascirev.2009.03.011, 2010.
Schüpbach et al., 2011:
Schüpbach, S., Federer, U., Bigler, M., Fischer, H., and Stocker, T. F.: A refined TALDICE-1a age scale
from 55 to 112 ka before present for the Talos Dome ice core based on high-resolution
methane measurements, Clim. Past Discuss., 7, 1175-1193, doi:10.5194/cpd-7-1175-2011, 2011.

## Sheet: 1 EDC-Vk
Depth EDC (m)	Depth Vostok (m)	Uncertainty (a)	type	Source
418.2	319.96	500	CH4	Lemieux-Dudon et al, 2010
442.7	346.16	500	CH4	Lemieux-Dudon et al, 2010
476.1	372.2	500	CH4	Lemieux-Dudon et al, 2010
743.44	614.71	1070	CH4	PHD loulergue
770.36	643.37	740	CH4	PHD loulergue
924.98	838.37	1400	CH4	PHD loulergue
930.69	845.47	1316	CH4	PHD loulergue
942.97	862.05	740	CH4	PHD loulergue
986.35	911.19	1152	CH4	PHD loulergue
1037.68	983.38	1234	CH4	PHD loulergue
1102.98	1075.79	1152	CH4	PHD loulergue
1110.47	1085.92	1317	CH4	PHD loulergue
1139.22	1125.46	987	CH4	PHD loulergue
1144.04	1133.77	5349	CH4	PHD loulergue
1200.36	1198.09	2551	CH4	PHD loulergue
1238.26	1264.36	1399	CH4	PHD loulergue
1285.5	1334.78	2139	CH4	PHD loulergue
1321.73	1386.92	1975	CH4	PHD loulergue
1358.99	1413.67	1070	CH4	PHD loulergue
1422.98	1464.13	1316	CH4	PHD loulergue
1462.4	1522.89	1481	CH4	PHD loulergue
1463	1529.3	1000	d18Oatm	Bazin et al., 2013
1472.7	1537	1000	CH4	Bazin et al., 2013
1476.8	1542.1	1000	CH4	Bazin et al., 2013
1477.76	1536.1	1481	CH4	PHD loulergue
1509.8	1592	1200	d18Oatm	Bazin et al., 2013
1541.46	1626.19	1234	CH4	PHD loulergue
1584	1685	1200	d18Oatm	Bazin et al., 2013
1589.64	1760.88	3000	CH4	PHD loulergue
1650.2	1784.3	1000	d18Oatm	Bazin et al., 2013
1694.33	1842.42	1563	CH4	PHD loulergue
1705.5	1863	1500	d18Oatm	Bazin et al., 2013
1718.28	1868.43	1200	CH4	PHD loulergue
1721.5	1881.05	1000	CH4	Bazin et al., 2013
1726.3	1887.27	1646	CH4	PHD loulergue
1816.12	2017.88	1600	CH4	PHD loulergue
1936.22	2230.19	2304	CH4	PHD loulergue
1980.41	2332.16	1234	CH4	PHD loulergue
1991.43	2345.69	3127	CH4	PHD loulergue
2001.29	2370.03	2057	CH4	PHD loulergue
2014.34	2386.66	1481	CH4	PHD loulergue
2028.34	2408.82	3539	CH4	PHD loulergue
2062.54	2461.55	2000	CH4	PHD loulergue
2072.17	2479.52	1481	CH4	PHD loulergue
2087.63	2499.76	2304	CH4	PHD loulergue
2104.96	2536.02	3950	CH4	PHD loulergue
2123.52	2558.66	2000	CH4	PHD loulergue
2193.65	2648.44	4197	CH4	PHD loulergue
2203.51	2658.35	2880	CH4	PHD loulergue
2265.7	2730.97	2551	CH4	PHD loulergue
2286.64	2760.31	2000	CH4	PHD loulergue
2305	2775.12	1500	CH4	PHD loulergue
2309.08	2780.59	1234	CH4	PHD loulergue
2315.56	2783.54	1500	CH4	PHD loulergue
2326.7	2799.61	1893	CH4	PHD loulergue
2335.99	2809.77	1810	CH4	PHD loulergue
2338.36	2815.25	1810	CH4	PHD loulergue
2361.48	2844.91	1564	CH4	PHD loulergue
2365.62	2857.56	1152	CH4	PHD loulergue
2370.96	2864.81	1481	CH4	PHD loulergue
2419.34	2911.06	1500	CH4	Bazin et al., 2013
2451.33	2954.61	1500	CH4	Bazin et al., 2013
2501.4	3018.01	1500	CH4	Bazin et al., 2013
2521.2	3051.5	1500	CH4	Bazin et al., 2013
2544.83	3079.41	1500	CH4	Bazin et al., 2013
2583.9	3123.5	1500	CH4	Bazin et al., 2013
2613	3162.8	1500	CH4	Bazin et al., 2013

## Sheet: 2 EDML-Vk
	NO DATA

## Sheet: 3 TD-Vk
Depth TALDICE (m)	Depth Vostok (m)	Uncertainty (a)	type	Source
668.93	310.5	1000	d18Oatm	Bazin et al.,2013
1255.55	907	1000	d18Oatm	Bazin et al.,2013
1308.39	1113	1000	d18Oatm	Bazin et al.,2013
1333.37	1244	1000	d18Oatm	Bazin et al.,2013
1357.95	1415	1500	d18Oatm	Bazin et al.,2013
1373.99	1535	1500	d18Oatm	Bazin et al.,2013
1390.4	1672.18	2000	d18Oatm	Bazin et al.,2013
1406.27	1853.15	2000	d18Oatm	Bazin et al.,2013

## Sheet: 4 NG-Vk
Depth NGRIP (m)	Depth Vostok (m)	Uncertainty (a)	type	Source
2897.4	1480.8	1200	d18Oatm	Landais et al., 2006
2944.7	1534.8	1000	CH4	Landais et al., 2006
2946.4	1538	1000	d18Oatm	Landais et al., 2006
3038	1643.2	1200	d18Oatm	Landais et al., 2006
3049.8	1678.4	1200	d18Oatm	Landais et al., 2006

## Sheet: 5 EDML-EDC
Depth EDML (m)	Depth EDC (m)	Uncertainty (a)	type	Comments	Source
717.962	418.275	500	CH4	YD-Hol	Schilt at al., 2010
765.334	443.13	500	CH4	BA-YD	Schilt at al., 2010
828.855	475.434	500	CH4	Start YD	Schilt at al., 2010
920.615	519.562	500	CH4	Start T1	Schilt at al., 2010
1032.9	579.9	500	CH4	end DO2	loulergue et al., 2007
1051.67	592.04	500	CH4	Max DO2	Schilt at al., 2010
1072.9	599.9	500	CH4	start DO2	loulergue et al., 2007
1148	635.4	500	CH4	end DO3	loulergue et al., 2007
1150.16	638.129	500	CH4	MaxDO3	Schilt at al., 2010
1155.1	639.1	500	CH4	start DO3	loulergue et al., 2007
1162.7	645.9	500	CH4	end DO4	loulergue et al., 2007
1171.67	649.597	500	CH4	Max DO4	Schilt at al., 2010
1174.2	651.9	500	CH4	start DO4	loulergue et al., 2007
1223.93	682.542	500	CH4	End DO5	Schilt at al., 2010
1233.61	688.397	500	CH4	Start DO5	Schilt at al., 2010
1248.14	697.413	500	CH4	End DO6	Schilt at al., 2010
1261.14	702.201	500	CH4	Start DO6	Schilt at al., 2010
1271.76	711.635	500	CH4	End DO7	Schilt at al., 2010
1286.78	719.924	500	CH4	Start DO7	Schilt at al., 2010
1308.77	732.523	500	CH4	End DO8	Schilt at al., 2010
1337.55	750.973	500	CH4	Start DO8	Schilt at al., 2010
1375.67	775.191	500	CH4	Max DO9	Schilt at al., 2010
1391.28	784.278	500	CH4	End DO10	Schilt at al., 2010
1404.34	790.6	500	CH4	Start DO10	Schilt at al., 2010
1415.16	797.677	500	CH4	End DO11	Schilt at al., 2010
1442.06	809.47	500	CH4	Start DO11	Schilt at al., 2010
1452.9	820.4	500	CH4	end DO12	loulergue et al., 2007
1490.53	848.853	500	CH4	Start DO12	Schilt at al., 2010
1503.1	858.7	500	CH4	end DO13	PHD loulergue
1511.1	862	500	CH4	start DO13	PHD loulergue
1552.56	891.015	500	CH4	End DO14	Schilt at al., 2010
1601.72	924.887	500	CH4	Start DO14	Schilt at al., 2010
1621.5	940.7	500	CH4	end DO15	PHD loulergue
1626.08	943.748	500	CH4	Max DO15	Schilt at al., 2010		modified EDML depth
1677.98	976.778	500	CH4	Max DO17	Schilt at al., 2010
1754.3	1030.9	612	CH4	end DO18	PHD loulergue
1758.98	1037.28	800	CH4	Max DO18	Schilt at al., 2010
1760	1038.6	487	CH4	start DO18	PHD loulergue
1846.6	1090.5	800	CH4	end DO19	PHD loulergue
1865.34	1105.54	800	CH4	start DO19	Schilt at al., 2010
1911.32	1138.52	800	CH4	Max DO20	Schilt at al., 2010
1914.3	1142.65	800	CH4		Bazin et al., 2013
1976.21	1188.02	1000	CH4	End DO21	Schilt at al., 2010
2023.77	1240.27	800	CH4	Start DO21	Schilt at al., 2010
2066.1	1280.3	488	CH4	End DO22	PHD loulergue
2088.15	1300.8	1000	CH4		Bazin et al., 2013
2155.88	1377.77	800	CH4	End DO23	Schilt at al., 2010
2190.01	1427.27	800	CH4	Start DO23	Schilt at al., 2010
2209.5	1445.15	1000	CH4		Bazin et al., 2013
2223.9	1463	3000	d18Oatm		Bazin et al., 2013
2230.4	1472.75	1000	CH4		Bazin et al., 2013
2230.49	1473.19	800	CH4	Start DO24	Schilt at al., 2010
2233.8	1476.8	1200	CH4		Bazin et al., 2013
2236.48	1485.02	800	CH4	End DO25	Schilt at al., 2010
2259.9	1509.8	3000	CH4		Bazin et al., 2013
2262.67	1512.52	800	CH4	Start DO25	Schilt at al., 2010
2299.98	1567.52	800	CH4	End MIS 5.5	Schilt at al., 2010
2309.85	1584	3000	d18Oatm		Bazin et al., 2013
2342.4	1650.2	3000	d18Oatm		Bazin et al., 2013
2366.9	1705.5	3000	d18Oatm		Bazin et al., 2013
2368.32	1718.77	800	CH4	Max MIS 5.5	Schilt at al., 2010
2369.25	1721.5	1200	CH4		Bazin et al., 2013
2380.9	1746.3	2000	d18Oatm		Bazin et al., 2013
2382.25	1757.27	800	CH4	Start MIS 5.5	Schilt at al., 2010

## Sheet: 6 TD-EDC
Depth TALDICE (m)	Depth EDC (m)	Uncertainty (a)	type	Comments	Source
1228	924.9	500	CH4		Buiron et al., 2011
1239	944.5	500	CH4		Buiron et al., 2011
1255.5	969.65	500	CH4		Schüpbach et al., 2011
1260.5	980.39	500	CH4	Onset DO17	Schüpbach et al., 2011
1262.67	984.52	500	CH4	precursor DO17	Schüpbach et al., 2011
1287.75	1039.51	500	CH4	onset DO18	Schüpbach et al., 2011
1306.25	1105.55	800	CH4	onset DO19	Schüpbach et al., 2011
1314.57	1141.27	800	CH4	onset DO20	Schüpbach et al., 2011
1326.14	1196.27	800	CH4		Schüpbach et al., 2011
1332.75	1234.77	800	CH4	peak DO21	Schüpbach et al., 2011
1335.25	1248.52	800	CH4		Schüpbach et al., 2011
1345	1302.7	800	CH4		Buiron et al., 2011
1356	1369.3	800	CH4		Buiron et al., 2011
1367.1	1427.27	800	CH4	onset DO23	Schüpbach et al., 2011
1368.4	1432.77	800	CH4		Schüpbach et al., 2011
1374.75	1471.27	800	CH4	onset DO24	Schüpbach et al., 2011
1380	1515.4	1000	CH4		Buiron et al., 2011
1385	1544.8	1500	CH4		Buiron et al., 2011
1394	1622	2000	CH4		Buiron et al., 2011
1410	1717.3	1000	CH4		Buiron et al., 2011
1420	1763.6	2000	CH4		Buiron et al., 2011
1428	1817.4	2000	CH4		Buiron et al., 2011

## Sheet: 7 NG-EDC
Depth NGRIP (m)	Depth EDC (m)	Uncertainty (a)	type	comments	Source
1692.09	519.562	500	CH4	Start T1	Schilt at al., 2010
2088.36	750.973	800	CH4	Start DO8	Schilt at al., 2010
2115.88	775.191	800	CH4	MAX DO9	Schilt at al., 2010
2149.07	797.677	800	CH4	END DO11	Schilt at al., 2010
2185.24	825.565	800	CH4	END DO12	Schilt at al., 2010
2377.68	943.748	800	CH4	Max DO15	Schilt at al., 2010

## Sheet: 8 TD-EDML
Depth TALDICE (m)	Depth EDML (m)	Uncertainty (a)	type	Source
1255.5	1663.5	500	CH4		Schüpbach et al., 2011
1260.5	1681.03	500	CH4	Onset DO17	Schüpbach et al., 2011
1262.67	1686.98	500	CH4	precursor DO17	Schüpbach et al., 2011
1287.75	1764.1	500	CH4	onset DO18	Schüpbach et al., 2011
1306.25	1862.5	500	CH4	onset DO19	Schüpbach et al., 2011
1314.57	1914.5	500	CH4	onset DO20	Schüpbach et al., 2011
1326.14	1978.1	500	CH4		Schüpbach et al., 2011
1332.75	2019.8	500	CH4	peak DO21	Schüpbach et al., 2011
1334	2025.2	500	CH4	precursor DO21	Schüpbach et al., 2011
1335.25	2031.2	500	CH4		Schüpbach et al., 2011
1367.1	2196	500	CH4	onset DO23	Schüpbach et al., 2011
1368.4	2199.32	500	CH4		Schüpbach et al., 2011
1374.75	2228.99	500	CH4	onset DO24	Schüpbach et al., 2011

## Sheet: 9 NG-EDML
Depth NGRIP (m)	Depth EDML (m)	Uncertainty (a)	type	Comments	Source
1511.54	716.554	300	CH4	YD-PB	Lemieux-Dudon et al, 2010
1540.08	767.193	300	CH4	BA-YD	Lemieux-Dudon et al, 2010
1627.89	827.531	300	CH4	GL-BA	Lemieux-Dudon et al, 2010
1673.15	905.3	300	CH4	slow raise	Lemieux-Dudon et al, 2010
1692.09	920.615	500	CH4	Start T1	Schilt at al., 2010
1796.95	1044.32	300	CH4	end DO2	Lemieux-Dudon et al, 2010
1818.63	1070.99	300	CH4	onset DO2	Lemieux-Dudon et al, 2010
1879.28	1149.2	300	CH4	end DO3	Lemieux-Dudon et al, 2010
1891.96	1152.9	300	CH4	onset DO3	Lemieux-Dudon et al, 2010
1901.97	1165.33	300	CH4	end DO4	Lemieux-Dudon et al, 2010
1909.45	1173.42	300	CH4	onset DO4	Lemieux-Dudon et al, 2010
1954.86	1224.54	300	CH4	end DO5	Lemieux-Dudon et al, 2010
1963.88	1233.39	300	CH4	onset DO5	Lemieux-Dudon et al, 2010
1981.94	1248.48	300	CH4	end DO6	Lemieux-Dudon et al, 2010
1991.88	1260.59	300	CH4	onset DO6	Lemieux-Dudon et al, 2010
2003.66	1272.56	300	CH4	end DO7	Lemieux-Dudon et al, 2010
2024.93	1286.72	300	CH4	onset DO7	Lemieux-Dudon et al, 2010
2042.86	1311.85	300	CH4	end DO8	Lemieux-Dudon et al, 2010
2088.36	1337.55	800	CH4	Start DO8	Schilt at al., 2010
2115.88	1375.67	800	CH4	Max DO9	Schilt at al., 2010
2124.36	1391.28	800	CH4	End DO10	Schilt at al., 2010
2141.1	1404.34	800	CH4	Start DO10	Schilt at al., 2010
2149.07	1415.16	800	CH4	End DO11	Schilt at al., 2010
2173.81	1442.06	800	CH4	Start DO11	Schilt at al., 2010
2185.66	1451.82	500	CH4	end DO12	Lemieux-Dudon et al, 2010
2236.86	1490.22	500	CH4	onset DO12	Lemieux-Dudon et al, 2010
2356.64	1601.72	800	CH4	Start DO14	Schilt at al., 2010
2377.68	1626.08	800	CH4	Max DO15	Schilt at al., 2010
2544	1860	800	CH4	mid-slope DO19	Capron et al., 2010
2552	1880.7	1000	d18Oatm		Capron et al., 2010
2581.4	1902.2	700	d18Oatm		Capron et al., 2010
2586.4	1914.3	700	CH4	mid-slope DO20	Capron et al., 2010
2667.1	1995.4	2000	d18Oatm		Capron et al., 2010
2680.6	2011.6	1000	d18Oatm		Capron et al., 2010
2694	2021.6	700	CH4	mid-slope DO21	Capron et al., 2010
2704.4	2034.3	1220	d18Oatm		Capron et al., 2010
2721.9	2068.9	1500	d18Oatm		Capron et al., 2010
2759.1	2091.5	1160	d18Oatm		Capron et al., 2010
2897.4	2198	700	CH4		Capron et al., 2010
2903.4	2204.5	700	CH4	mid-slope DO23	Capron et al., 2010
2911.7	2209.9	700	CH4		Capron et al., 2010
2932.6	2224.9	1000	d18Oatm		Capron et al., 2010
2945.2	2230.4	700	CH4		Capron et al., 2010
2948.5	2233.8	700	CH4	mid-slope DO24	Capron et al., 2010
2958.5	2239	700	CH4		Capron et al., 2010

[truncated: 1 more sheets: 10 NG-TD]
