# Supplementary material for: An optimized multi-proxy, multi-site Antarctic ice and gas orbital chronology (AICC2012): 120–800 ka
Source: Copernicus journal article supplement (doi:10.5194/cp-9-1715-2013), 2013-08-01
Supplement: Supplementary file 3 [file AICC2012_ice_stratigraphic_links.xls]

## Sheet: Intro
AICC2012 Ice stratigraphic links
These ice stratigraphic links are used to construct the AICC2012 chronology for EDC, Vostok, EDML, TALDICE and NGRIP
The origin of the data is specified in the source column.
When using the AICC2012 chronology, please cite Bazin et al., 2013 and Veres et al., 2013
Bazin et al., 2013:
Bazin, L., Landais, A., Lemieux-Dudon, B., Toye Mahamadou Kele, H., Veres, D., Parrenin, F., Martinerie, P.,
Ritz, C., Capron, E., Lipenkov, V., Loutre, M.-F., Raynaud, D., Vinther, B., Svensson, A., Rasmussen, S.,
Severi, M., Blunier, T., Leuenberger, M., Fischer, H., Masson-Delmotte, V., Chappellaz, J., and Wolff, E.:
An optimized multi-proxies, multi-site Antarctic ice and gas orbital chronology (AICC2012): 120-800 ka,
Climate of the Past, 9, 1715-1731, doi:10.5194/cp-9-1715-2013, 2013.
Veres et al., 2013:
Veres, D., Bazin, L., Landais, A., Toye Mahamadou Kele,H., Lemieux-Dudon, B., Parrenin, F., Martinerie, P.,
Blayo, E., Blunier, T., Capron, E., Chappellaz, J., Rasmussen, S., Severi, M., Svensson, A., Vinther, B., and Wolff, E.: The
Antarctic ice core chronology (AICC2012): an optimized multi-parameter and multi-site dating approach
for the last 120 thousand years, Climate of the Past, 9, 1733-1748, doi:10.5194/cp-9-1733-2013, 2013.
References:
Loulergue et al., 2007:
Loulergue, L., Parrenin, F., Blunier, T., Barnola, J.-M., Spahni, R., Schilt, A., Raisbeck, G., and Chappellaz, J.:
New constraints on the gas age-ice age difference along the EPICA ice cores, 0-50 kyr, Climate of the Past,
3, 527–540, 2007.
Narcisi et al., 2005:
B. Narcisi, J.R. Petit, B. Delmonte, I. Basile-Doelsch, V. Maggi: Characteristics and sources of tephra layers in the EPICA-Dome C
ice record (East Antarctica): Implications for past atmospheric circulation and ice core stratigraphic correlations,
Earth and Planetary Science Letters, 239, 253– 265, doi:10.1016/j.epsl.2005.09.005, 2005.
Parrenin et al., 2012:
Parrenin, F., Petit, J.-R., Masson-Delmotte, V., Wolff, E., Basile-Doelsch, I., Jouzel, J., Lipenkov, V., Rasmussen,
S. O., Schwander, J., Severi, M., Udisti, R., Veres, D., and Vinther, B. M.: Volcanic synchronisation
between the EPICA Dome C and Vostok ice cores (Antarctica) 0-145 kyr BP, Climate of the Past, 8, 1031–
1045, doi:10.5194/cp-8-1031-2012, 2012.
Ruth et al. 2007:
Ruth, U., Barnola, J.-M., Beer, J., Bigler, M., Blunier, T., Castellano, E., Fischer, H., Fundel, F., Huybrechts,
P., Kaufmann, P., Kipfstuhl, S., Lambrecht, A., Morganti, A., Oerter, H., Parrenin, F., Rybak, O., Severi,
M., Udisti, R., Wilhelms, F., and Wolff, E.: ”EDML1”: a chronology for the EPICA deep ice core from
Dronning Maud Land, Antarctica, over the last 150 000 years, Climate of the Past, 3, 475–484, doi:10.5194/
cp-3-475-2007, 2007.
Severi et al. 2007:
Severi, M., Becagli, S., Castellano, E., Morganti, A., Traversi, R., Udisti, R., Ruth, U., Fischer, H., Huybrechts,
P., Wolff, E., Parrenin, F., Kaufmann, P., Lambert, F., and Steffensen, J. P.: Synchronisation of the EDML
and EDC ice cores for the last 52 kyr by volcanic signature matching, Climate of the Past, 3, 367–374, 2007.
Severi et al., 2012:
Severi, M., Udisti, R., Becagli, S., Stenni, B., and Traversi, R.: Volcanic synchronisation of the EPICA-DC and
TALDICE ice cores for the last 42 kyr BP, Climate of the Past, 8, 509–517, doi:10.5194/cp-8-509-2012,
2012
Svensson et al., 2013:
Svensson, A., Bigler, M., Blunier, T., Clausen, H. B., Dahl-Jensen, D., Fischer, H., Fujita, S., Goto-Azuma, K.,
Johnsen, S. J., Kawamura, K., Kipfstuhl, S., Kohno, M., Parrenin, F., Popp, T., Rasmussen, S. O., Schwander,
J., Seierstad, I., Severi, M., Steffensen, J. P., Udisti, R., Uemura, R., Vallelonga, P., Vinther, B. M., Wegner,
A.,Wilhelms, F., andWinstrup, M.: Direct linking of Greenland and Antarctic ice cores at the Toba eruption
(74 ka BP), Climate of the Past, 9, 749–766, doi:10.5194/cp-9-749-2013, 2013.
Udisti et al., 2004:
Udisti, R., Becagli, S., Castellano, E., Delmonte, B., Jouzel, J., Petit, J. R., Schwander, J., Stenni, B., andWolff,
E. W.: Stratigraphic correlations between the European Project for Ice Coring in Antarctica (EPICA) Dome
C and Vostok ice cores showing the relative variations of snow accumulation over the past 45 kyr, Journal of
Geophysical Research (Atmospheres), 109, D08101, doi:10.1029/2003JD004180, 2004.
Vinther et al., 2013 in prep:
Vinther, B., Clausen, H., Kipfstuhl, S., Fischer, H., Bigler, M., Oerter, H., Wegner, A., Wilhelms, F., Sevri, M.,
Udisti, R., Beer, J., Steinhilber, F., Adolphi, F., Muschler, R., Rasmussen, S., Steffensen, J., and Svensson,
A.: A stratigraphic Antarctic chronology covering the past 16700 years in the EPICA deep ice core from
Dronning Maud Land, In prep, 2013.

## Sheet: 1 EDC-Vk
All depths are on EDC 99 and Vostok 5G cores
Depth EDC (m)	Depth Vostok (m)	Uncertainty (a)	type	Source
12.59	10.01	200	volcanic	Parrenin et al., 2012
29.6	23.57	200	volcanic	Parrenin et al., 2012
37.93	30.21	200	volcanic	Parrenin et al., 2012
96.86	76.96	200	volcanic	Parrenin et al., 2012
232.57	179.67	200	volcanic	Parrenin et al., 2012
243.13	187.31	200	volcanic	Parrenin et al., 2012
387.31	289.94	200	volcanic	Udisti et al., 2004, reconfirmed by Parrenin et al. 2012
389.32	291.41	200	volcanic	Udisti et al., 2004, reconfirmed by Parrenin et al. 2012
393	294.21	200	volcanic	Udisti et al., 2004, reconfirmed by Parrenin et al. 2012
404.14	302.92	200	volcanic	Udisti et al., 2004, reconfirmed by Parrenin et al. 2012
438.09	328.62	200	volcanic	Udisti et al., 2004, reconfirmed by Parrenin et al. 2012
492.53	372.65	200	volcanic	Udisti et al., 2004, reconfirmed by Parrenin et al. 2012
494.64	374.29	200	volcanic	Parrenin et al., 2012
553.12	422.85	200	volcanic	Parrenin et al., 2012
564.39	432.36	200	volcanic	Udisti et al., 2004, reconfirmed by Parrenin et al. 2012
632.23	496.49	200	volcanic	Udisti et al., 2004, reconfirmed by Parrenin et al. 2012
645.92	511.15	200	volcanic	Udisti et al., 2004, reconfirmed by Parrenin et al. 2012
677.14	547.33	200	volcanic	Udisti et al., 2004, reconfirmed by Parrenin et al. 2012
700.62	571.76	200	volcanic	Parrenin et al., 2012
790.52	657.45	500	volcanic	Parrenin et al., 2012
791.87	658.85	500	volcanic	Parrenin et al., 2012
798.49	665.45	500	volcanic	Parrenin et al., 2012
874.22	766.44	500	volcanic	Parrenin et al., 2012
1013.73	947.52	500	volcanic	Parrenin et al., 2012
1019.45	955.56	500	volcanic	Parrenin et al., 2012
1040.5	983.8	500	volcanic	Parrenin et al., 2012
1071.2	1023.5	500	volcanic	Parrenin et al., 2012
1078.95	1035	500	volcanic	Parrenin et al., 2012
1079.7	1036	500	volcanic	Parrenin et al., 2012
1081.28	1038.45	500	volcanic	Parrenin et al., 2012
1084.73	1043.56	500	volcanic	Parrenin et al., 2012
1087.94	1048.35	500	volcanic	Parrenin et al., 2012
1097.96	1063	500	volcanic	Parrenin et al., 2012
1098.63	1063.96	500	volcanic	Parrenin et al., 2012
1140.58	1119.53	500	volcanic	Parrenin et al., 2012
1173.05	1156.55	500	volcanic	Parrenin et al., 2012
1176.13	1160.5	500	volcanic	Parrenin et al., 2012
1179	1164.35	500	volcanic	Parrenin et al., 2012
1238.72	1244.91	500	volcanic	Parrenin et al., 2012
1271.2	1283.45	500	volcanic	Parrenin et al., 2012
1278.6	1291.8	500	volcanic	Parrenin et al., 2012
1312.4	1332.6	500	volcanic	Parrenin et al., 2012
1314.15	1334.65	500	volcanic	Parrenin et al., 2012
1316.3	1337.6	500	volcanic	Parrenin et al., 2012
1342.72	1372.44	500	volcanic	Parrenin et al., 2012
1344.23	1374.64	500	volcanic	Parrenin et al., 2012
1353.24	1386.73	500	volcanic	Parrenin et al., 2012
1429.12	1465.02	252	volcanic	Parrenin et al., 2012
1439.88	1478.49	243	volcanic	Parrenin et al., 2012
1443.42	1483.12	222	volcanic	Parrenin et al., 2012
1447.72	1488.81	218	volcanic	Parrenin et al., 2012
1448.39	1489.7	230	volcanic	Parrenin et al., 2012
1451.03	1493.34	230	volcanic	Parrenin et al., 2012
1452.38	1495.23	237	volcanic	Parrenin et al., 2012
1454.69	1498.5	228	volcanic	Parrenin et al., 2012
1455.98	1500.34	224	volcanic	Parrenin et al., 2012
1456.59	1501.33	237	volcanic	Parrenin et al., 2012
1470.51	1521.75	251	volcanic	Parrenin et al., 2012
1480.96	1537.39	237	volcanic	Parrenin et al., 2012
1482.8	1540.2	236	volcanic	Parrenin et al., 2012
1489.18	1550.39	236	volcanic	Parrenin et al., 2012
1494.9	1559.18	243	volcanic	Parrenin et al., 2012
1502.62	1571.15	246	volcanic	Parrenin et al., 2012
1506.28	1576.67	231	volcanic	Parrenin et al., 2012
1510.12	1582.09	246	volcanic	Parrenin et al., 2012
1511.51	1584	233	volcanic	Parrenin et al., 2012
1538.62	1618.24	215	volcanic	Parrenin et al., 2012
1541.13	1621.23	213	volcanic	Parrenin et al., 2012
1554.63	1637.66	186	volcanic	Parrenin et al., 2012
1563	1648.56	180	volcanic	Parrenin et al., 2012
1572.65	1662.08	171	volcanic	Parrenin et al., 2012
1580.3	1673.03	176	volcanic	Parrenin et al., 2012
1580.78	1673.74	176	volcanic	Parrenin et al., 2012
1581.11	1674.22	176	volcanic	Parrenin et al., 2012
1587.15	1682.91	168	volcanic	Parrenin et al., 2012
1598.85	1699.71	167	volcanic	Parrenin et al., 2012
1604.1	1707.25	161	volcanic	Parrenin et al., 2012
1607.2	1711.5	167	volcanic	Parrenin et al., 2012
1610.1	1715.55	159	volcanic	Parrenin et al., 2012
1631.16	1743.59	173	volcanic	Parrenin et al., 2012
1676	1801.7	161	volcanic	Parrenin et al., 2012
1678.9	1805.43	156	volcanic	Parrenin et al., 2012
1683.97	1811.99	153	volcanic	Parrenin et al., 2012
1690.85	1820.8	152	volcanic	Parrenin et al., 2012
1696.67	1828.3	138	volcanic	Parrenin et al., 2012
1704.3	1838.34	146	volcanic	Parrenin et al., 2012
1708.9	1844.6	153	volcanic	Parrenin et al., 2012
1711.1	1847.65	141	volcanic	Parrenin et al., 2012
1716.85	1855.5	149	volcanic	Parrenin et al., 2012
1726.85	1869.7	167	volcanic	Parrenin et al., 2012
1731.78	1876.63	180	volcanic	Parrenin et al., 2012
1734.65	1880.8	182	volcanic	Parrenin et al., 2012
1745.91	1896.85	230	volcanic	Parrenin et al., 2012
1748.07	1899.85	231	volcanic	Parrenin et al., 2012
1767.4	1926.7	315	volcanic	Parrenin et al., 2012
1769	1929	345	volcanic	Parrenin et al., 2012
1771.48	1932.75	356	volcanic	Parrenin et al., 2012
1772.9	1934.9	357	volcanic	Parrenin et al., 2012
1781.6	1948.7	350	volcanic	Parrenin et al., 2012
1782.85	1950.95	344	volcanic	Parrenin et al., 2012
1789.22	1962.65	371	volcanic	Parrenin et al., 2012
1791.25	1966.36	351	volcanic	Parrenin et al., 2012
1799.25	1982.11	335	volcanic	Parrenin et al., 2012
1804	1991.93	100	volcanic	Narcisi et al., 2005, reconfirmed by F. Parrenin

## Sheet: 2 EDML-Vk
	NO DATA

## Sheet: 3 TD-Vk
NO DATA

## Sheet: 4 NG-Vk
NO DATA

## Sheet: 5 EDML-EDC
Ruth et al. 2007; Severi et al. 2007 matching was on EDC96. Transfer on EDC99 made by F. Parrenin
Depth EDML (m)	Depth EDC (m)	Uncertainty (a)	type	Source
17.19	8.17	20	Volcanic	Ruth et al. 2007; Severi et al. 2007
24.94	12.16	20	Volcanic	Ruth et al. 2007; Severi et al. 2007
46.1	23.051	20	Volcanic	Ruth et al. 2007; Severi et al. 2007
59.11	29.64	20	Volcanic	Ruth et al. 2007; Severi et al. 2007
75.38	37.94	20	Volcanic	Ruth et al. 2007; Severi et al. 2007
77.67	39.05	20	Volcanic	Ruth et al. 2007; Severi et al. 2007
82.32	41.24	20	Volcanic	Ruth et al. 2007; Severi et al. 2007
117.725	60.28	20	Volcanic	Ruth et al. 2007; Severi et al. 2007
125.243	64.045	20	Volcanic	Ruth et al. 2007; Severi et al. 2007
127.65	65.151	20	Volcanic	Ruth et al. 2007; Severi et al. 2007
130.917	67.034	20	Volcanic	Ruth et al. 2007; Severi et al. 2007
134.69	68.977	20	Volcanic	Ruth et al. 2007; Severi et al. 2007
143.59	73.39	20	Volcanic	Ruth et al. 2007; Severi et al. 2007
146.22	74.685	20	Volcanic	Ruth et al. 2007; Severi et al. 2007
148.233	75.591	20	Volcanic	Ruth et al. 2007; Severi et al. 2007
150.413	76.647	20	Volcanic	Ruth et al. 2007; Severi et al. 2007
152.857	77.813	20	Volcanic	Ruth et al. 2007; Severi et al. 2007
154.75	78.699	100	Volcanic	Ruth et al. 2007; Severi et al. 2007
155.98	79.277	100	Volcanic	Ruth et al. 2007; Severi et al. 2007
164.4	83.67	100	Volcanic	Ruth et al. 2007; Severi et al. 2007
165.22	84.059	100	Volcanic	Ruth et al. 2007; Severi et al. 2007
167.01	84.866	100	Volcanic	Ruth et al. 2007; Severi et al. 2007
190.64	95.764	100	Volcanic	Ruth et al. 2007; Severi et al. 2007
192.75	96.84	100	Volcanic	Ruth et al. 2007; Severi et al. 2007
256.47	126.33	100	Volcanic	Ruth et al. 2007; Severi et al. 2007
257.09	126.61	100	Volcanic	Ruth et al. 2007; Severi et al. 2007
265.78	130.54	100	Volcanic	Ruth et al. 2007; Severi et al. 2007
272.31	133.61	100	Volcanic	Ruth et al. 2007; Severi et al. 2007
276.3	135.38	100	Volcanic	Ruth et al. 2007; Severi et al. 2007
285.7	139.762	100	Volcanic	Ruth et al. 2007; Severi et al. 2007
286.3	140.04	100	Volcanic	Ruth et al. 2007; Severi et al. 2007
289.31	141.3	100	Volcanic	Ruth et al. 2007; Severi et al. 2007
292.44	142.826	100	Volcanic	Ruth et al. 2007; Severi et al. 2007
296.29	144.66	100	Volcanic	Ruth et al. 2007; Severi et al. 2007
322.34	156.535	100	Volcanic	Ruth et al. 2007; Severi et al. 2007
329.71	159.99	100	Volcanic	Ruth et al. 2007; Severi et al. 2007
338.1	163.976	100	Volcanic	Ruth et al. 2007; Severi et al. 2007
349.69	169.29	100	Volcanic	Ruth et al. 2007; Severi et al. 2007
363.66	175.91	100	Volcanic	Ruth et al. 2007; Severi et al. 2007
429.16	208.58	100	Volcanic	Ruth et al. 2007; Severi et al. 2007
431.26	209.73	100	Volcanic	Ruth et al. 2007; Severi et al. 2007
438.98	213.771	100	Volcanic	Ruth et al. 2007; Severi et al. 2007
442.63	215.749	100	Volcanic	Ruth et al. 2007; Severi et al. 2007
448.28	218.812	100	Volcanic	Ruth et al. 2007; Severi et al. 2007
473.98	232.57	100	Volcanic	Ruth et al. 2007; Severi et al. 2007
477.15	234.427	100	Volcanic	Ruth et al. 2007; Severi et al. 2007
493.58	243.13	100	Volcanic	Ruth et al. 2007; Severi et al. 2007
508.32	251.22	100	Volcanic	Ruth et al. 2007; Severi et al. 2007
512.77	253.766	100	Volcanic	Ruth et al. 2007; Severi et al. 2007
523.07	259.31	100	Volcanic	Ruth et al. 2007; Severi et al. 2007
531.88	264.03	100	Volcanic	Ruth et al. 2007; Severi et al. 2007
543.65	270.42	100	Volcanic	Ruth et al. 2007; Severi et al. 2007
565.03	283	100	Volcanic	Ruth et al. 2007; Severi et al. 2007
576.69	290.034	100	Volcanic	Ruth et al. 2007; Severi et al. 2007
578.33	291.224	100	Volcanic	Ruth et al. 2007; Severi et al. 2007
582.64	293.996	100	Volcanic	Ruth et al. 2007; Severi et al. 2007
598.31	304.28	100	Volcanic	Ruth et al. 2007; Severi et al. 2007
600.41	305.579	100	Volcanic	Ruth et al. 2007; Severi et al. 2007
608.42	310.94	100	Volcanic	Ruth et al. 2007; Severi et al. 2007
611.2	312.701	100	Volcanic	Ruth et al. 2007; Severi et al. 2007
618.14	317.34	100	Volcanic	Ruth et al. 2007; Severi et al. 2007
623.49	321.034	100	Volcanic	Ruth et al. 2007; Severi et al. 2007
624.94	321.95	100	Volcanic	Ruth et al. 2007; Severi et al. 2007
625.58	322.375	100	Volcanic	Ruth et al. 2007; Severi et al. 2007
629.89	325.17	100	Volcanic	Ruth et al. 2007; Severi et al. 2007
650.26	338.56	100	Volcanic	Ruth et al. 2007; Severi et al. 2007
651.35	339.278	100	Volcanic	Ruth et al. 2007; Severi et al. 2007
657.72	343.61	100	Volcanic	Ruth et al. 2007; Severi et al. 2007
667.05	349.921	100	Volcanic	Ruth et al. 2007; Severi et al. 2007
668.07	350.634	100	Volcanic	Ruth et al. 2007; Severi et al. 2007
671.25	352.81	100	Volcanic	Ruth et al. 2007; Severi et al. 2007
703.31	371.933	100	Volcanic	Ruth et al. 2007; Severi et al. 2007
712.255	377.042	100	Volcanic	Ruth et al. 2007; Severi et al. 2007
731.47	387.31	100	Volcanic	Ruth et al. 2007; Severi et al. 2007
733.62	388.69	100	Volcanic	Ruth et al. 2007; Severi et al. 2007
734.75	389.33	100	Volcanic	Ruth et al. 2007; Severi et al. 2007
741.25	393	100	Volcanic	Ruth et al. 2007; Severi et al. 2007
750.2	397.821	100	Volcanic	Ruth et al. 2007; Severi et al. 2007
754.72	400.397	100	Volcanic	Ruth et al. 2007; Severi et al. 2007
761.69	404.14	100	Volcanic	Ruth et al. 2007; Severi et al. 2007
793.2	421.895	100	Volcanic	Ruth et al. 2007; Severi et al. 2007
801.47	425.962	100	Volcanic	Ruth et al. 2007; Severi et al. 2007
805.33	427.872	100	Volcanic	Ruth et al. 2007; Severi et al. 2007
806.03	428.18	100	Volcanic	Ruth et al. 2007; Severi et al. 2007
808.23	429.229	100	Volcanic	Ruth et al. 2007; Severi et al. 2007
813.77	431.95	100	Volcanic	Ruth et al. 2007; Severi et al. 2007
825.99	438.09	100	Volcanic	Ruth et al. 2007; Severi et al. 2007
845.35	447.22	100	Volcanic	Ruth et al. 2007; Severi et al. 2007
852.35	450.49	100	Volcanic	Ruth et al. 2007; Severi et al. 2007
854.43	451.51	100	Volcanic	Ruth et al. 2007; Severi et al. 2007
859.65	453.97	100	Volcanic	Ruth et al. 2007; Severi et al. 2007
873.07	460.39	100	Volcanic	Ruth et al. 2007; Severi et al. 2007
879.86	463.49	100	Volcanic	Ruth et al. 2007; Severi et al. 2007
882.82	464.96	100	Volcanic	Ruth et al. 2007; Severi et al. 2007
896.77	471.6	100	Volcanic	Ruth et al. 2007; Severi et al. 2007
916.59	481.5	100	Volcanic	Ruth et al. 2007; Severi et al. 2007
940.82	494.7	100	Volcanic	Ruth et al. 2007; Severi et al. 2007
949.18	499.206	100	Volcanic	Ruth et al. 2007; Severi et al. 2007
952.25	500.895	100	Volcanic	Ruth et al. 2007; Severi et al. 2007
955.21	502.553	100	Volcanic	Ruth et al. 2007; Severi et al. 2007
955.6	502.723	100	Volcanic	Ruth et al. 2007; Severi et al. 2007
956.11	503.023	100	Volcanic	Ruth et al. 2007; Severi et al. 2007
958.25	504.362	100	Volcanic	Ruth et al. 2007; Severi et al. 2007
961.37	505.99	100	Volcanic	Ruth et al. 2007; Severi et al. 2007
968.87	510.047	100	Volcanic	Ruth et al. 2007; Severi et al. 2007
972.71	512.544	100	Volcanic	Ruth et al. 2007; Severi et al. 2007
976.48	514.782	100	Volcanic	Ruth et al. 2007; Severi et al. 2007
988.3	521.51	100	Volcanic	Ruth et al. 2007; Severi et al. 2007
1001.4	528.28	100	Volcanic	Ruth et al. 2007; Severi et al. 2007
1008.8	532.32	100	Volcanic	Ruth et al. 2007; Severi et al. 2007
1024.18	540.36	100	Volcanic	Ruth et al. 2007; Severi et al. 2007
1026.45	541.44	100	Volcanic	Ruth et al. 2007; Severi et al. 2007
1027.58	541.95	100	Volcanic	Ruth et al. 2007; Severi et al. 2007
1037.16	546.42	100	Volcanic	Ruth et al. 2007; Severi et al. 2007
1038.99	547.34	100	Volcanic	Ruth et al. 2007; Severi et al. 2007
1049.49	552.23	100	Volcanic	Ruth et al. 2007; Severi et al. 2007
1051.35	553.11	100	Volcanic	Ruth et al. 2007; Severi et al. 2007
1051.81	553.32	100	Volcanic	Ruth et al. 2007; Severi et al. 2007
1059.06	556.72	100	Volcanic	Ruth et al. 2007; Severi et al. 2007
1061.17	557.67	100	Volcanic	Ruth et al. 2007; Severi et al. 2007
1069.71	561.36	100	Volcanic	Ruth et al. 2007; Severi et al. 2007
1076.93	564.39	100	Volcanic	Ruth et al. 2007; Severi et al. 2007
1080.95	566.111	100	Volcanic	Ruth et al. 2007; Severi et al. 2007
1084.13	567.524	100	Volcanic	Ruth et al. 2007; Severi et al. 2007
1085.66	568.21	100	Volcanic	Ruth et al. 2007; Severi et al. 2007
1089.42	569.942	100	Volcanic	Ruth et al. 2007; Severi et al. 2007
1097.16	573.255	100	Volcanic	Ruth et al. 2007; Severi et al. 2007
1103.61	576.02	100	Volcanic	Ruth et al. 2007; Severi et al. 2007
1109.62	578.96	100	Volcanic	Ruth et al. 2007; Severi et al. 2007
1122.95	585.638	100	Volcanic	Ruth et al. 2007; Severi et al. 2007
1125.78	586.979	100	Volcanic	Ruth et al. 2007; Severi et al. 2007
1126.79	587.52	100	Volcanic	Ruth et al. 2007; Severi et al. 2007
1132.84	590.636	100	Volcanic	Ruth et al. 2007; Severi et al. 2007
1137.99	593.44	100	Volcanic	Ruth et al. 2007; Severi et al. 2007
1140.6	595.02	100	Volcanic	Ruth et al. 2007; Severi et al. 2007
1146.8	598.841	100	Volcanic	Ruth et al. 2007; Severi et al. 2007
1160.14	606.979	100	Volcanic	Ruth et al. 2007; Severi et al. 2007
1174.51	615.99	100	Volcanic	Ruth et al. 2007; Severi et al. 2007
1176.38	617.35	100	Volcanic	Ruth et al. 2007; Severi et al. 2007
1181.29	620.575	100	Volcanic	Ruth et al. 2007; Severi et al. 2007
1190.6	626.5	100	Volcanic	Ruth et al. 2007; Severi et al. 2007
1191.33	627.004	100	Volcanic	Ruth et al. 2007; Severi et al. 2007
1194.68	629.134	100	Volcanic	Ruth et al. 2007; Severi et al. 2007
1196.25	630.12	100	Volcanic	Ruth et al. 2007; Severi et al. 2007
1199.56	632.23	100	Volcanic	Ruth et al. 2007; Severi et al. 2007
1203.16	634.589	100	Volcanic	Ruth et al. 2007; Severi et al. 2007
1206.07	636.359	100	Volcanic	Ruth et al. 2007; Severi et al. 2007
1207.67	637.437	100	Volcanic	Ruth et al. 2007; Severi et al. 2007
1210.25	638.941	100	Volcanic	Ruth et al. 2007; Severi et al. 2007
1220.1	644.762	100	Volcanic	Ruth et al. 2007; Severi et al. 2007
1221.99	645.919	100	Volcanic	Ruth et al. 2007; Severi et al. 2007
1233.79	653.216	100	Volcanic	Ruth et al. 2007; Severi et al. 2007
1246.35	660.782	100	Volcanic	Ruth et al. 2007; Severi et al. 2007
1247.97	661.84	100	Volcanic	Ruth et al. 2007; Severi et al. 2007
1254.95	666.342	100	Volcanic	Ruth et al. 2007; Severi et al. 2007
1262.27	670.994	100	Volcanic	Ruth et al. 2007; Severi et al. 2007
1265.77	673.176	100	Volcanic	Ruth et al. 2007; Severi et al. 2007
1268.42	674.849	100	Volcanic	Ruth et al. 2007; Severi et al. 2007
1269.4	675.397	100	Volcanic	Ruth et al. 2007; Severi et al. 2007
1272.26	677.14	100	Volcanic	Ruth et al. 2007; Severi et al. 2007
1276.31	679.525	100	Volcanic	Ruth et al. 2007; Severi et al. 2007
1281.54	682.588	100	Volcanic	Ruth et al. 2007; Severi et al. 2007
1283.81	684.035	100	Volcanic	Ruth et al. 2007; Severi et al. 2007
1291.84	689.074	100	Volcanic	Ruth et al. 2007; Severi et al. 2007
1295.08	691.08	100	Volcanic	Ruth et al. 2007; Severi et al. 2007
1295.79	691.592	100	Volcanic	Ruth et al. 2007; Severi et al. 2007
1297.64	692.778	100	Volcanic	Ruth et al. 2007; Severi et al. 2007
1302.36	695.574	100	Volcanic	Ruth et al. 2007; Severi et al. 2007
1304.84	697.254	100	Volcanic	Ruth et al. 2007; Severi et al. 2007
1307.64	699.004	100	Volcanic	Ruth et al. 2007; Severi et al. 2007
1308.58	699.674	100	Volcanic	Ruth et al. 2007; Severi et al. 2007
1309.97	700.63	100	Volcanic	Ruth et al. 2007; Severi et al. 2007
1311.09	701.28	100	Volcanic	Ruth et al. 2007; Severi et al. 2007
1313.07	702.541	100	Volcanic	Ruth et al. 2007; Severi et al. 2007
1329.22	711.676	100	Volcanic	Ruth et al. 2007; Severi et al. 2007
1339.69	717.444	100	Volcanic	Ruth et al. 2007; Severi et al. 2007
1341.79	718.601	100	Volcanic	Ruth et al. 2007; Severi et al. 2007
1342.5	719.03	100	Volcanic	Ruth et al. 2007; Severi et al. 2007
1350.59	723.82	100	Volcanic	Ruth et al. 2007; Severi et al. 2007
1354.56	726.28	100	Volcanic	Ruth et al. 2007; Severi et al. 2007
1356.1	727.238	100	Volcanic	Ruth et al. 2007; Severi et al. 2007
1357.33	728.038	100	Volcanic	Ruth et al. 2007; Severi et al. 2007
1358.12	728.532	100	Volcanic	Ruth et al. 2007; Severi et al. 2007
1360.17	729.816	100	Volcanic	Ruth et al. 2007; Severi et al. 2007
1364.97	732.848	100	Volcanic	Ruth et al. 2007; Severi et al. 2007
1372.71	737.46	100	Volcanic	Ruth et al. 2007; Severi et al. 2007
1375.14	739.13	100	Volcanic	Ruth et al. 2007; Severi et al. 2007
1386.56	746.004	100	Volcanic	Ruth et al. 2007; Severi et al. 2007
1387.27	746.434	100	Volcanic	Ruth et al. 2007; Severi et al. 2007
1389.99	748.122	100	Volcanic	Ruth et al. 2007; Severi et al. 2007
1393.78	750.29	100	Volcanic	Ruth et al. 2007; Severi et al. 2007
1398.6	753.397	100	Volcanic	Ruth et al. 2007; Severi et al. 2007
1400.11	754.297	100	Volcanic	Ruth et al. 2007; Severi et al. 2007
1403.4	756.335	100	Volcanic	Ruth et al. 2007; Severi et al. 2007
1411.98	762.22	100	Volcanic	Ruth et al. 2007; Severi et al. 2007
1431.26	775.04	100	Volcanic	Ruth et al. 2007; Severi et al. 2007
1435.08	777.67	100	Volcanic	Ruth et al. 2007; Severi et al. 2007
1439.06	780.59	20	Volcanic	Ruth et al. 2007; Severi et al. 2007
1454.37	791.88	20	Volcanic	Ruth et al. 2007; Severi et al. 2007
1461.66	797.39	20	Volcanic	Ruth et al. 2007; Severi et al. 2007
1491.92	818.41	20	Volcanic	Ruth et al. 2007; Severi et al. 2007
1497.9	822.07	20	Volcanic	Ruth et al. 2007; Severi et al. 2007
1528.64	843.53	20	Volcanic	Ruth et al. 2007; Severi et al. 2007
1551.82	859.7	20	Volcanic	Ruth et al. 2007; Severi et al. 2007
1555.78	862.52	20	Volcanic	Ruth et al. 2007; Severi et al. 2007
1568.31	871.41	100	Volcanic	Ruth et al. 2007; Severi et al. 2007
1572.18	874.22	100	Volcanic	Ruth et al. 2007; Severi et al. 2007
1576.65	877.448	100	Volcanic	Ruth et al. 2007; Severi et al. 2007
1580.79	880.523	100	Volcanic	Ruth et al. 2007; Severi et al. 2007
1627.04	913.034	100	Volcanic	Ruth et al. 2007; Severi et al. 2007
1628.86	914.42	100	Volcanic	Ruth et al. 2007; Severi et al. 2007
1645.95	927.113	20	Volcanic	Ruth et al. 2007; Severi et al. 2007
1648.9	929.197	20	Volcanic	Ruth et al. 2007; Severi et al. 2007
1699.12	963.982	100	Volcanic	Ruth et al. 2007; Severi et al. 2007
1775.2	1019.41	100	Volcanic	Ruth et al. 2007; Severi et al. 2007
1809.65	1041.9	20	Volcanic	Ruth et al. 2007; Severi et al. 2007
1831.68	1055.94	100	Volcanic	Ruth et al. 2007; Severi et al. 2007
1833.97	1057.51	100	Volcanic	Ruth et al. 2007; Severi et al. 2007
1853.65	1070.21	100	Volcanic	Ruth et al. 2007; Severi et al. 2007
1853.91	1070.4	100	Volcanic	Ruth et al. 2007; Severi et al. 2007
1866.24	1078.68	100	Volcanic	Ruth et al. 2007; Severi et al. 2007
1866.61	1078.96	100	Volcanic	Ruth et al. 2007; Severi et al. 2007
1867.5	1079.72	100	Volcanic	Ruth et al. 2007; Severi et al. 2007
1869.47	1081.27	100	Volcanic	Ruth et al. 2007; Severi et al. 2007
1870.94	1082.29	100	Volcanic	Ruth et al. 2007; Severi et al. 2007
1877.84	1087.94	100	Volcanic	Ruth et al. 2007; Severi et al. 2007
1890.59	1097.96	100	Volcanic	Ruth et al. 2007; Severi et al. 2007
1891.46	1098.63	100	Volcanic	Ruth et al. 2007; Severi et al. 2007
1987.55	1176.08	100	Volcanic	Ruth et al. 2007; Severi et al. 2007
2080.2	1271.19	20	Volcanic	Ruth et al. 2007; Severi et al. 2007
2088.84	1279.13	20	Volcanic	Ruth et al. 2007; Severi et al. 2007
2096.05	1285.88	20	Volcanic	Ruth et al. 2007; Severi et al. 2007
2098.38	1287.94	20	Volcanic	Ruth et al. 2007; Severi et al. 2007
2145.57	1342.71	100	Volcanic	Ruth et al. 2007; Severi et al. 2007
2171.7	1373.89	100	Volcanic	Ruth et al. 2007; Severi et al. 2007
2211.32	1426.86	100	Volcanic	Ruth et al. 2007; Severi et al. 2007
2213.01	1429.11	20	Volcanic	Ruth et al. 2007; Severi et al. 2007
2215.23	1432.47	100	Volcanic	Ruth et al. 2007; Severi et al. 2007
2273.06	1510.78	20	Volcanic	Ruth et al. 2007; Severi et al. 2007
2294.09	1538.61	100	Volcanic	Ruth et al. 2007; Severi et al. 2007

## Sheet: 6 TD-EDC
Depth TALDICE (m)	Depth EDC (m)	Uncertainty (a)	type	Source
20.37	8.28	100	Volcanic	Severi et al., 2012, reconfirmed E. Wolff
29.56	12.16	20	Volcanic	Severi et al., 2012, reconfirmed E. Wolff
30.37	12.501	20	Volcanic	Severi et al., 2012, reconfirmed E. Wolff
36.14	15.1887	100	Volcanic	Severi et al., 2012, reconfirmed E. Wolff
48.82	21.0856	100	Volcanic	Severi et al., 2012, reconfirmed E. Wolff
67.36	29.6397	20	Volcanic	Severi et al., 2012, reconfirmed E. Wolff
77.96	34.3912	100	Volcanic	Severi et al., 2012, reconfirmed E. Wolff
83.49	36.7868	20	Volcanic	Severi et al., 2012, reconfirmed E. Wolff
85.94	37.94	20	Volcanic	Severi et al., 2012, reconfirmed E. Wolff
88.27	39.05	20	Volcanic	Severi et al., 2012, reconfirmed E. Wolff
91.55	40.569	20	Volcanic	Severi et al., 2012, reconfirmed E. Wolff
93.12	41.24	20	Volcanic	Severi et al., 2012, reconfirmed E. Wolff
128.6	57.685	20	Volcanic	Severi et al., 2012, reconfirmed E. Wolff
133.52	60.2797	20	Volcanic	Severi et al., 2012, reconfirmed E. Wolff
142.17	64.0453	20	Volcanic	Severi et al., 2012, reconfirmed E. Wolff
152.84	68.9765	100	Volcanic	Severi et al., 2012, reconfirmed E. Wolff
162.54	73.3896	20	Volcanic	Severi et al., 2012, reconfirmed E. Wolff
167.45	75.5912	20	Volcanic	Severi et al., 2012, reconfirmed E. Wolff
172.32	77.8127	20	Volcanic	Severi et al., 2012, reconfirmed E. Wolff
182.82	82.3952	20	Volcanic	Severi et al., 2012, reconfirmed E. Wolff
186.19	84.0588	20	Volcanic	Severi et al., 2012, reconfirmed E. Wolff
188.31	84.8658	20	Volcanic	Severi et al., 2012, reconfirmed E. Wolff
215.33	96.84	20	Volcanic	Severi et al., 2012, reconfirmed E. Wolff
264.63	119.53	20	Volcanic	Severi et al., 2012, reconfirmed E. Wolff
276.55	125.009	20	Volcanic	Severi et al., 2012, reconfirmed E. Wolff
280.07	126.61	20	Volcanic	Severi et al., 2012, reconfirmed E. Wolff
288.48	130.54	100	Volcanic	Severi et al., 2012, reconfirmed E. Wolff
294.93	133.61	20	Volcanic	Severi et al., 2012, reconfirmed E. Wolff
298.8	135.389	20	Volcanic	Severi et al., 2012, reconfirmed E. Wolff
308.21	140.049	20	Volcanic	Severi et al., 2012, reconfirmed E. Wolff
310.73	141.3	20	Volcanic	Severi et al., 2012, reconfirmed E. Wolff
317.32	144.66	20	Volcanic	Severi et al., 2012, reconfirmed E. Wolff
335.05	153.64	20	Volcanic	Severi et al., 2012, reconfirmed E. Wolff
340.77	156.534	20	Volcanic	Severi et al., 2012, reconfirmed E. Wolff
353.04	162.97	20	Volcanic	Severi et al., 2012, reconfirmed E. Wolff
354.84	163.976	20	Volcanic	Severi et al., 2012, reconfirmed E. Wolff
365.04	169.289	20	Volcanic	Severi et al., 2012, reconfirmed E. Wolff
419.21	198.573	100	Volcanic	Severi et al., 2012, reconfirmed E. Wolff
437.33	208.58	100	Volcanic	Severi et al., 2012, reconfirmed E. Wolff
439.3	209.729	100	Volcanic	Severi et al., 2012, reconfirmed E. Wolff
450.03	215.524	100	Volcanic	Severi et al., 2012, reconfirmed E. Wolff
450.54	215.749	100	Volcanic	Severi et al., 2012, reconfirmed E. Wolff
455.95	218.811	100	Volcanic	Severi et al., 2012, reconfirmed E. Wolff
509.25	249.099	100	Volcanic	Severi et al., 2012, reconfirmed E. Wolff
512.89	251.219	100	Volcanic	Severi et al., 2012, reconfirmed E. Wolff
526.24	259.309	100	Volcanic	Severi et al., 2012, reconfirmed E. Wolff
544.06	270.42	20	Volcanic	Severi et al., 2012, reconfirmed E. Wolff
562.84	283	20	Volcanic	Severi et al., 2012, reconfirmed E. Wolff
594.22	304.279	20	Volcanic	Severi et al., 2012, reconfirmed E. Wolff
596.32	305.579	20	Volcanic	Severi et al., 2012, reconfirmed E. Wolff
606.62	312.7	20	Volcanic	Severi et al., 2012, reconfirmed E. Wolff
608.05	313.695	20	Volcanic	Severi et al., 2012, reconfirmed E. Wolff
613.61	317.34	20	Volcanic	Severi et al., 2012, reconfirmed E. Wolff
619.24	321.034	20	Volcanic	Severi et al., 2012, reconfirmed E. Wolff
620.48	321.949	20	Volcanic	Severi et al., 2012, reconfirmed E. Wolff
645.21	338.559	20	Volcanic	Severi et al., 2012, reconfirmed E. Wolff
651.34	342.69	20	Volcanic	Severi et al., 2012, reconfirmed E. Wolff
652.67	343.61	20	Volcanic	Severi et al., 2012, reconfirmed E. Wolff
663.28	350.633	100	Volcanic	Severi et al., 2012, reconfirmed E. Wolff
666.74	352.81	20	Volcanic	Severi et al., 2012, reconfirmed E. Wolff
717.18	387.31	100	Volcanic	Severi et al., 2012, reconfirmed E. Wolff
720.4	389.33	100	Volcanic	Severi et al., 2012, reconfirmed E. Wolff
725.67	392.999	100	Volcanic	Severi et al., 2012, reconfirmed E. Wolff
804.46	453.96	100	Volcanic	Severi et al., 2012, reconfirmed E. Wolff
905.95	561.36	100	Volcanic	Severi et al., 2012, reconfirmed E. Wolff
908.84	564.39	20	Volcanic	Severi et al., 2012, reconfirmed E. Wolff
911.74	567.523	20	Volcanic	Severi et al., 2012, reconfirmed E. Wolff
912.39	568.21	20	Volcanic	Severi et al., 2012, reconfirmed E. Wolff
913.97	569.941	20	Volcanic	Severi et al., 2012, reconfirmed E. Wolff
922.24	578.96	20	Volcanic	Severi et al., 2012, reconfirmed E. Wolff
929.86	587.519	100	Volcanic	Severi et al., 2012, reconfirmed E. Wolff
935.31	593.439	20	Volcanic	Severi et al., 2012, reconfirmed E. Wolff
940.35	598.84	20	Volcanic	Severi et al., 2012, reconfirmed E. Wolff
948.24	606.978	20	Volcanic	Severi et al., 2012, reconfirmed E. Wolff
956.75	615.99	20	Volcanic	Severi et al., 2012, reconfirmed E. Wolff
966.75	626.5	20	Volcanic	Severi et al., 2012, reconfirmed E. Wolff
972.18	632.23	20	Volcanic	Severi et al., 2012, reconfirmed E. Wolff
976.26	636.358	20	Volcanic	Severi et al., 2012, reconfirmed E. Wolff
977.38	637.436	20	Volcanic	Severi et al., 2012, reconfirmed E. Wolff
984.68	644.761	20	Volcanic	Severi et al., 2012, reconfirmed E. Wolff
985.84	645.918	20	Volcanic	Severi et al., 2012, reconfirmed E. Wolff
1000.52	660.103	100	Volcanic	Severi et al., 2012, reconfirmed E. Wolff
1002.32	661.84	20	Volcanic	Severi et al., 2012, reconfirmed E. Wolff
1007.25	666.342	100	Volcanic	Severi et al., 2012, reconfirmed E. Wolff
1012.29	670.994	20	Volcanic	Severi et al., 2012, reconfirmed E. Wolff
1016.93	675.396	20	Volcanic	Severi et al., 2012, reconfirmed E. Wolff
1018.75	677.14	20	Volcanic	Severi et al., 2012, reconfirmed E. Wolff
1021.31	679.524	20	Volcanic	Severi et al., 2012, reconfirmed E. Wolff
1028.38	685.911	100	Volcanic	Severi et al., 2012, reconfirmed E. Wolff
1032.05	689.074	20	Volcanic	Severi et al., 2012, reconfirmed E. Wolff
1034.28	691.08	20	Volcanic	Severi et al., 2012, reconfirmed E. Wolff
1034.81	691.591	20	Volcanic	Severi et al., 2012, reconfirmed E. Wolff
1042.92	699	20	Volcanic	Severi et al., 2012, reconfirmed E. Wolff
1044.49	700.63	20	Volcanic	Severi et al., 2012, reconfirmed E. Wolff
1045.22	701.28	20	Volcanic	Severi et al., 2012, reconfirmed E. Wolff
1046.56	702.541	20	Volcanic	Severi et al., 2012, reconfirmed E. Wolff
1064.44	718.601	20	Volcanic	Severi et al., 2012, reconfirmed E. Wolff
1064.88	719.03	20	Volcanic	Severi et al., 2012, reconfirmed E. Wolff
1072.91	726.279	20	Volcanic	Severi et al., 2012, reconfirmed E. Wolff
1085.66	737.46	20	Volcanic	Severi et al., 2012, reconfirmed E. Wolff
1087.39	739.129	20	Volcanic	Severi et al., 2012, reconfirmed E. Wolff
1097.72	748.122	20	Volcanic	Severi et al., 2012, reconfirmed E. Wolff

## Sheet: 7 NG-EDC
	Depth NGRIP (m)	Depth EDC (m)	Uncertainty (a)	type	Source
	2110.1	735.5	110	10Be	Loulergue et al., 2007
	2127.5	744.8	111	10Be	Loulergue et al., 2007

## Sheet: 8 TD-EDML
NO DATA

## Sheet: 9 NG-EDML
Depth NGRIP (m)	Depth EDML (m)	Uncertainty (a)	type	Source
35.59	17.2	50	Layer count.	Vinther et al., 2013 in prep
47.85	22.8	50	Layer count.	Vinther et al., 2013 in prep
48.7	23.24	50	Layer count.	Vinther et al., 2013 in prep
52.4	24.95	50	Layer count.	Vinther et al., 2013 in prep
53.83	25.64	50	Layer count.	Vinther et al., 2013 in prep
78.47	37.49	50	Layer count.	Vinther et al., 2013 in prep
89.19	42.39	50	Layer count.	Vinther et al., 2013 in prep
96.94	46.15	50	Layer count.	Vinther et al., 2013 in prep
124.13	59.09	50	Layer count.	Vinther et al., 2013 in prep
145.89	68.55	50	Layer count.	Vinther et al., 2013 in prep
158.12	74.01	50	Layer count.	Vinther et al., 2013 in prep
161.49	75.38	50	Layer count.	Vinther et al., 2013 in prep
166.77	77.68	50	Layer count.	Vinther et al., 2013 in prep
177.61	82.32	50	Layer count.	Vinther et al., 2013 in prep
265.32	117.71	50	Layer count.	Vinther et al., 2013 in prep
284.21	125.25	50	Layer count.	Vinther et al., 2013 in prep
290.21	127.65	50	Layer count.	Vinther et al., 2013 in prep
331.21	143.58	50	Layer count.	Vinther et al., 2013 in prep
337.42	146.15	50	Layer count.	Vinther et al., 2013 in prep
342.27	148.27	50	Layer count.	Vinther et al., 2013 in prep
353.26	152.87	50	Layer count.	Vinther et al., 2013 in prep
406.79	173.84	50	Layer count.	Vinther et al., 2013 in prep
410.73	175.32	50	Layer count.	Vinther et al., 2013 in prep
453	192.75	50	Layer count.	Vinther et al., 2013 in prep
476.48	202.87	50	Layer count.	Vinther et al., 2013 in prep
481.98	204.91	50	Layer count.	Vinther et al., 2013 in prep
500.31	212.09	50	Layer count.	Vinther et al., 2013 in prep
570.73	240.7	50	Layer count.	Vinther et al., 2013 in prep
609.52	256.45	50	Layer count.	Vinther et al., 2013 in prep
641.01	270.72	50	Layer count.	Vinther et al., 2013 in prep
644.87	272.3	50	Layer count.	Vinther et al., 2013 in prep
678.63	286.44	50	Layer count.	Vinther et al., 2013 in prep
684.97	289.28	50	Layer count.	Vinther et al., 2013 in prep
702.01	296.28	50	Layer count.	Vinther et al., 2013 in prep
761.04	322.34	50	Layer count.	Vinther et al., 2013 in prep
777.54	329.6	50	Layer count.	Vinther et al., 2013 in prep
793.59	336.67	50	Layer count.	Vinther et al., 2013 in prep
824.1	349.69	50	Layer count.	Vinther et al., 2013 in prep
907.48	384.76	50	Layer count.	Vinther et al., 2013 in prep
926.39	392.82	50	Layer count.	Vinther et al., 2013 in prep
964.59	409.51	50	Layer count.	Vinther et al., 2013 in prep
971.87	412.67	50	Layer count.	Vinther et al., 2013 in prep
1011.62	429.15	50	Layer count.	Vinther et al., 2013 in prep
1016.23	431.24	50	Layer count.	Vinther et al., 2013 in prep
1056.33	448.29	50	Layer count.	Vinther et al., 2013 in prep
1118.32	473.97	50	Layer count.	Vinther et al., 2013 in prep
1163.62	493.58	50	Layer count.	Vinther et al., 2013 in prep
1234.93	525.5	50	Layer count.	Vinther et al., 2013 in prep
1248.69	531.9	50	Layer count.	Vinther et al., 2013 in prep
1256.52	535.54	50	Layer count.	Vinther et al., 2013 in prep
1273.39	543.62	50	Layer count.	Vinther et al., 2013 in prep
1296.21	554.93	50	Layer count.	Vinther et al., 2013 in prep
1316.18	565.03	50	Layer count.	Vinther et al., 2013 in prep
1338.36	576.69	50	Layer count.	Vinther et al., 2013 in prep
1341.32	578.32	50	Layer count.	Vinther et al., 2013 in prep
1349.38	582.64	50	Layer count.	Vinther et al., 2013 in prep
1371.54	595.34	50	Layer count.	Vinther et al., 2013 in prep
1376.59	598.32	50	Layer count.	Vinther et al., 2013 in prep
1380.09	600.4	50	Layer count.	Vinther et al., 2013 in prep
1399.37	611.23	50	Layer count.	Vinther et al., 2013 in prep
1410.64	618.13	50	Layer count.	Vinther et al., 2013 in prep
1416.85	622.08	50	Layer count.	Vinther et al., 2013 in prep
1419.07	623.52	50	Layer count.	Vinther et al., 2013 in prep
1421.17	624.93	50	Layer count.	Vinther et al., 2013 in prep
1424.22	626.94	50	Layer count.	Vinther et al., 2013 in prep
1426.16	628.21	50	Layer count.	Vinther et al., 2013 in prep
1428.52	629.89	50	Layer count.	Vinther et al., 2013 in prep
1458.67	650.25	50	Layer count.	Vinther et al., 2013 in prep
1462.87	653.38	50	Layer count.	Vinther et al., 2013 in prep
1466.11	655.88	50	Layer count.	Vinther et al., 2013 in prep
1468.59	657.71	50	Layer count.	Vinther et al., 2013 in prep
1470.65	659.14	50	Layer count.	Vinther et al., 2013 in prep
1479.72	667.04	50	Layer count.	Vinther et al., 2013 in prep
1485.09	671.28	50	Layer count.	Vinther et al., 2013 in prep
2111.58	1369.54	100	Layer count./volcanic	Svensson et al., 2013
2115.41	1372.73	100	Layer count./volcanic	Svensson et al., 2013
2118.62	1375.15	100	Layer count./volcanic	Svensson et al., 2013
2547.22	1866.62	100	Layer count./volcanic	Svensson et al., 2013
2547.97	1867.56	100	Layer count./volcanic	Svensson et al., 2013
2550.06	1869.51	100	Layer count./volcanic	Svensson et al., 2013
2551.45	1870.93	100	Layer count./volcanic	Svensson et al., 2013
2558.43	1877.57	100	Layer count./volcanic	Svensson et al., 2013
2558.76	1877.85	100	Layer count./volcanic	Svensson et al., 2013
2564.35	1882.96	100	Layer count./volcanic	Svensson et al., 2013
2564.7	1883.31	100	Layer count./volcanic	Svensson et al., 2013
2572.61	1890.58	100	Layer count./volcanic	Svensson et al., 2013

[truncated: 1 more sheets: 10 NG-TD]
