# Supplementary material for: An optimized multi-proxy, multi-site Antarctic ice and gas orbital chronology (AICC2012): 120–800 ka
Source: Copernicus journal article supplement (doi:10.5194/cp-9-1715-2013), 2013-08-01
Supplement: Supplementary file 4 [file AICC2012_official.xls]

## Sheet: Intro
AICC2012 age scale.
The new age scale is tuned to GICC05 over the last 60 ka.
References:
Bazin et al., 2013:
Bazin, L., Landais, A., Lemieux-Dudon, B., Toye Mahamadou Kele, H., Veres, D., Parrenin, F., Martinerie, P.,
Ritz, C., Capron, E., Lipenkov, V., Loutre, M.-F., Raynaud, D., Vinther, B., Svensson, A., Rasmussen, S.,
Severi, M., Blunier, T., Leuenberger, M., Fischer, H., Masson-Delmotte, V., Chappellaz, J., and Wolff, E.:
An optimized multi-proxies, multi-site Antarctic ice and gas orbital chronology (AICC2012): 120-800 ka,
Climate of the Past, 9, 1715-1731, doi:10.5194/cp-9-1715-2013, 2013.
Veres et al., 2013:
Veres, D., Bazin, L., Landais, A., Toye Mahamadou Kele,H., Lemieux-Dudon, B., Parrenin, F., Martinerie, P.,
Blayo, E., Blunier, T., Capron, E., Chappellaz, J., Rasmussen, S., Severi, M., Svensson, A., Vinther, B., and Wolff, E.: The
Antarctic ice core chronology (AICC2012): an optimized multi-parameter and multi-site dating approach
for the last 120 thousand years, Climate of the Past, 9, 1733-1748, doi:10.5194/cp-9-1733-2013, 2013.

## Sheet: Vostok
VOSTOK
Depth (m)	Ice age (a B1950)	Ice age std (a)	Gas age (a B1950)	Gas age std (a)	Accu. Rate (m ie)	Thinning	LIDIE (m ie)
0	-50	3.78234	-1	-1	0.021701	0.994166	-1
2	-14.2632	7.58548	-1	-1	0.0217034	0.99327	-1
4	22.5688	11.4203	-1	-1	0.0217062	0.992435	-1
6	60.6805	15.3081	-1	-1	0.0217094	0.991479	-1
8	100.031	19.3891	-1	-1	0.0210255	0.9905	-1
10	142.142	23.4811	-1	-1	0.0212334	0.98953	-1
12	185.215	28.0605	-1	-1	0.0192533	0.988528	-1
14	234.447	32.3612	-1	-1	0.0208906	0.987515	-1
16	281.418	36.7808	-1	-1	0.0206661	0.986546	-1
18	330.564	40.7758	-1	-1	0.0231934	0.985647	-1
20	375.882	44.9559	-1	-1	0.0222285	0.984824	-1
22	424.806	49.4019	-1	-1	0.0207613	0.984022	-1
24	478.845	54.1738	-1	-1	0.0192362	0.983183	-1
26	539.069	58.6152	-1	-1	0.0204867	0.982369	-1
28	597.354	62.843	-1	-1	0.0216178	0.981451	-1
30	654.195	67.534	-1	-1	0.019457	0.980537	-1
32	719.191	71.8184	-1	-1	0.0209991	0.979711	-1
34	780.971	76.12	-1	-1	0.0210094	0.978741	-1
36	844.24	80.3741	-1	-1	0.0210217	0.977854	-1
38	908.941	84.5124	-1	-1	0.0213895	0.976965	-1
40	973.927	88.6393	-1	-1	0.0211222	0.976083	-1
42	1041.06	92.6412	-1	-1	0.0214054	0.975197	-1
44	1108.51	96.6409	-1	-1	0.0210963	0.974313	-1
46	1178.13	100.729	-1	-1	0.0200891	0.973424	-1
48	1252.43	104.693	-1	-1	0.0201835	0.97253	-1
50	1327.52	108.237	-1	-1	0.0221947	0.971644	-1
52	1396.85	111.754	-1	-1	0.0218003	0.97074	-1
54	1468.44	115.373	-1	-1	0.0206856	0.969853	-1
56	1544.95	119.009	-1	-1	0.019998	0.968933	-1
58	1625.2	122.555	-1	-1	0.0199304	0.967985	-1
60	1706.84	126.039	-1	-1	0.0200305	0.967175	-1
62	1789.07	129.454	-1	-1	0.0200967	0.966273	-1
64	1872.03	132.598	-1	-1	0.021682	0.965389	-1
66	1949.9	135.762	-1	-1	0.021376	0.964496	-1
68	2029.74	138.939	-1	-1	0.0212249	0.963606	-1
70	2111	142.212	-1	-1	0.020677	0.96272	-1
72	2195.34	145.365	-1	-1	0.0215158	0.96176	-1
74	2277.16	148.43	-1	-1	0.0223038	0.96082	-1
76	2356.86	151.782	-1	-1	0.0201878	0.959758	-1
78	2445.79	154.966	-1	-1	0.021792	0.958914	-1
80	2528.91	158.369	-1	-1	0.0206741	0.958074	-1
82	2617.26	161.63	-1	-1	0.0219268	0.957214	-1
84	2701.31	165.273	-1	-1	0.0194008	0.956256	-1
86	2797.04	168.417	-1	-1	0.0221001	0.955205	-1
88	2881.78	171.721	-1	-1	0.0206133	0.954281	-1
90	2973.34	175.048	-1	-1	0.0202631	0.953465	-1
92	3067.18	178.13	-1	-1	0.0214326	0.952579	-1
94	3156.57	181.018	-1	-1	0.0221974	0.951673	-1
96	3243.53	466.911	-1	-1	0.0212142	0.950749	-1
98	3335.15	482.422	-1	-1	0.0217657	0.949797	-1
100	3425.08	484.574	-1	-1	0.0225142	0.948782	-1
102	3512.53	532.469	-1	-1	0.0205877	0.947756	-1
104	3608.72	504.785	-1	-1	0.0230685	0.946791	-1
106	3695.12	525.629	-1	-1	0.022775	0.945732	-1
108	3783.15	587.047	-1	-1	0.0212422	0.94461	-1
110	3877.99	597.015	-1	-1	0.0220229	0.943633	-1
112	3969.94	620.369	-1	-1	0.021008	0.942638	-1
114	4066.8	625.445	-1	-1	0.0207904	0.941684	-1
116	4165.07	607.342	-1	-1	0.0204329	0.9407	-1
118	4265.48	570.33	-1	-1	0.0223124	0.939656	-1
120	4357.77	540.431	-1	-1	0.0244333	0.938623	-1
122	4442.41	543.406	-1	-1	0.0244394	0.937611	-1
124	4527.29	581.843	-1	-1	0.0241993	0.936579	-1
126	4613.28	615.119	-1	-1	0.0221812	0.935578	-1
128	4707.39	593.222	-1	-1	0.0210033	0.93462	-1
130	4807.04	598.124	-1	-1	0.0225342	0.933538	-1
132	4900.21	624.267	-1	-1	0.0207135	0.932577	-1
134	5001.78	584.073	-1	-1	0.0213916	0.931572	-1
136	5100.38	571.586	-1	-1	0.0226078	0.930602	-1
138	5193.92	560.802	-1	-1	0.0217827	0.929639	-1
140	5291.16	550.318	-1	-1	0.02268	0.928586	-1
142	5384.79	548.136	-1	-1	0.0228732	0.927693	-1
144	5477.77	549.536	-1	-1	0.0229863	0.926712	-1
146	5570.49	550.004	-1	-1	0.0224354	0.92564	-1
148	5665.69	549.976	-1	-1	0.0223239	0.924611	-1
150	5761.52	545.818	-1	-1	0.0219895	0.923566	60.4455
152	5858.96	541.611	3168.82	435.448	0.0223039	0.922696	61.8132
154	5955.22	561.326	3205.19	442.851	0.0226655	0.921691	63.1893
156	6050.1	552.25	3241.75	466.549	0.0215355	0.920561	64.3581
158	6150.12	554.473	3290.01	476.38	0.0225247	0.919601	65.8257
160	6245.91	550.199	3324.37	480.354	0.0221772	0.918699	67.1027
162	6343.38	576.629	3366.72	488.472	0.0221591	0.917709	68.4253
164	6441.04	585.584	3407.13	481.597	0.0200645	0.916664	69.4154
166	6549.13	540.05	3461.5	490.616	0.0215769	0.915664	70.9858
168	6649.75	533.294	3490.39	539.723	0.022178	0.914574	72.4074
170	6747.86	566.776	3598.05	504.44	0.0224461	0.913713	73.7768
172	6844.89	577.167	3634.17	505.608	0.020566	0.912571	74.7805
174	6950.98	579.719	3684.64	523.4	0.0209133	0.911607	76.1652
176	7055.46	589.653	3720.09	530.94	0.0209875	0.910598	77.5001
178	7159.75	592.12	3758	578.803	0.0208359	0.909685	78.7933
180	7264.9	546.324	3798.46	592.065	0.0224395	0.908733	80.4135
182	7362.73	553.045	3827.04	600.383	0.0221044	0.907711	81.6778
184	7462.16	576.081	3871.35	593.068	0.0212152	0.906714	82.8359
186	7565.87	546.933	3918.98	621.412	0.0224616	0.905625	83.3313
188	7664	541.872	3995.76	619.841	0.0228947	0.904431	83.0963
190	7760.44	569.669	4108.32	628.72	0.0224426	0.903401	82.699
192	7858.99	602.193	4229.82	582.95	0.0213101	0.902457	82.1687
194	7962.88	625.834	4350.68	540.182	0.0208509	0.901467	81.7632
196	8069.23	624	4454.85	543.843	0.0213746	0.900439	81.5498
198	8173.09	606.385	4551.77	594.684	0.0221964	0.899553	81.3839
200	8273.26	570.239	4650.5	627.481	0.0251121	0.898629	81.5667
202	8361.88	601.973	4742.36	572.167	0.0210361	0.897692	80.5369
204	8467.79	596.565	4886.35	629.957	0.0218373	0.897178	80.3694
206	8569.88	591.352	4996.41	584.753	0.0218345	0.896574	79.4209
208	8672.04	578.111	5137.48	566.887	0.021362	0.895841	77.4417
210	8776.55	564.145	5320.39	547.166	0.0214227	0.895162	75.5583
212	8880.84	585.088	5494.61	549.789	0.0230471	0.894533	73.9327
214	8977.85	610.17	5659.25	550.256	0.0214227	0.893844	73.0776
216	9082.3	637.512	5794.65	544.38	0.0213791	0.89324	73.1848
218	9187.03	616.189	5889.21	540.308	0.0218804	0.892725	73.3827
220	9289.42	593.102	5978.44	568.717	0.0217046	0.892205	73.4691
222	9392.7	581.686	6072.63	547.073	0.0228775	0.891659	73.7736
224	9490.75	572.093	6160.62	555.475	0.0224485	0.891184	73.5884
226	9590.72	563.496	6266.34	548.935	0.0214309	0.890692	72.6103
228	9695.49	554.486	6408.16	599.914	0.0225433	0.890228	71.9802
230	9795.15	578.723	6544.88	540.336	0.0237713	0.889732	71.5017
232	9889.71	599.922	6668.52	532.034	0.021749	0.889259	71.2603
234	9993.12	596.359	6778.48	580.183	0.0214853	0.888779	71.386
236	10097.9	567.863	6874.26	575.834	0.0222952	0.888448	71.6837
238	10198.8	527.866	6967.32	580.546	0.0221479	0.888259	71.8282
240	10300.5	545.255	7065.79	590.719	0.0220542	0.888004	71.9841
242	10402.6	562.724	7163.84	592.181	0.0238619	0.887396	72.4322
244	10497.1	577.961	7250.39	545.435	0.021755	0.886623	72.2607
246	10600.8	624.164	7359.41	552.115	0.0218418	0.885923	72.4263
248	10704.1	600.154	7454.01	578.588	0.0217463	0.885541	72.5555
250	10808	584.424	7552.87	548.21	0.0216413	0.884679	72.6787
252	10912.4	569.504	7649.41	538.727	0.0216997	0.883718	72.8806
254	11016.7	572.997	7740.87	558.448	0.0226035	0.88297	73.7404
256	11116.9	576.353	7804.27	594.796	0.0225742	0.882095	74.5476
258	11217.4	574.584	7871.55	603.892	0.023004	0.881346	75.3626
260	11316	583.384	7941.04	627.823	0.0234771	0.880556	76.1799
262	11412.8	648.348	8011.77	621.381	0.0249322	0.879531	77.1518
264	11504	669.444	8076.63	624.338	0.0228071	0.878473	77.5306
266	11603.8	709.772	8167.45	611.046	0.0225143	0.877456	78.1909
268	11705	757.112	8242.76	548.769	0.0211782	0.876326	78.6422
270	11812.8	770.641	8321.29	604.046	0.0206267	0.874984	75.3183
272	11923.6	800.374	8574.87	591.097	0.020407	0.873582	72.0712
274	12035.8	828.476	8830.78	556.898	0.0194853	0.872168	72.5775
276	12153.5	849.379	8914.81	604.211	0.0188193	0.870871	73.1085
278	12275.5	881.077	8995.19	611.808	0.0191203	0.869463	73.8109
280	12395.8	926.386	9073.11	639.122	0.0184888	0.867958	77.2513
282	12520.5	974.663	9027.42	641.115	0.0178774	0.866372	77.0276
284	12649.6	1076.67	9148.57	625.9	0.0169156	0.864717	76.765
286	12786.3	1153.99	9269.97	595.252	0.0174886	0.862954	75.3619
288	12918.8	1264.67	9440.06	576.451	0.0166622	0.861128	71.1219
290	13058.2	1324.24	9733.11	551.252	0.017355	0.859305	71.2146
292	13192.3	1369.76	9833.21	595.573	0.0179386	0.857427	71.0349
294	13322.4	1448.87	9946.21	604.27	0.0174926	0.855383	70.8583
296	13456	1433.29	10065.9	584.092	0.0171235	0.853509	70.6819
298	13592.9	1391.11	10182.3	525.037	0.0173812	0.851683	66.7715
300	13728	1401.89	10456.1	571.867	0.0179343	0.849848	67.0362
302	13859.2	1432.45	10550.4	585.894	0.0167016	0.848933	69.0493
304	14000.3	1378.59	10568.7	604.99	0.0168952	0.847715	71.337
306	14139.9	1304.03	10576.2	625.636	0.0178907	0.846468	73.7934
308	14272	1257.97	10576.7	635.218	0.0193752	0.84524	75.0977
310	14394.1	1288.97	10627.9	611.703	0.0192948	0.844377	71.1688
312	14516.8	1370.64	10907.6	569.341	0.0188022	0.843908	68.6162
314	14642.9	1425.46	11121.7	576.511	0.0179857	0.843336	69.5363
316	14774.8	1467.18	11185.1	571.682	0.0172011	0.843093	70.4568
318	14912.7	1482.06	11246.9	577.238	0.0164719	0.842874	71.3893
320	15056.7	1476.35	11307.5	576.28	0.0168267	0.843912	72.9078
322	15197.6	1450.65	11338.9	602.488	0.0162149	0.844904	73.4429
324	15343.5	1474.34	11410.2	647.765	0.0163812	0.845471	72.3731
326	15487.9	1482.25	11544.4	678.803	0.0155942	0.846198	71.228
328	15639.5	1494.86	11691.2	755.377	0.0156364	0.847326	70.3185
330	15790.5	1594.68	11835.9	773.544	0.0145732	0.848616	69.2674
332	15952.2	1583.16	11992	821.288	0.0151287	0.849614	68.6008
334	16107.8	1623.74	12136.8	845.035	0.0150565	0.850533	67.8221
336	16264	1755.98	12294.5	886.001	0.0141583	0.851156	67.2191
338	16429.9	1734.09	12444.8	945.905	0.014331	0.852004	67.828
340	16593.7	1757.21	12534	979.824	0.0145647	0.852896	68.4545
342	16754.7	1834.65	12624.8	1073.07	0.0136395	0.853808	68.8659
344	16926.5	1903.35	12731.7	1088.6	0.0138618	0.854784	69.5605
346	17095.3	1945.15	12822.1	1196.93	0.0131596	0.855437	70.1161
348	17272.9	1997.3	12920.2	1265.65	0.0128011	0.855825	70.8611
350	17455.5	1986.33	13013.3	1289.66	0.0129674	0.856278	71.7229
352	17635.6	2075.56	13097.5	1354.45	0.0126555	0.85683	72.4283
354	17820	2216.9	13188.4	1366.32	0.0117941	0.857436	72.9322
356	18017.8	2127.64	13287.6	1452.91	0.0114493	0.858225	72.2202
358	18221.3	2157.42	13457.3	1433.14	0.0122047	0.858884	71.3342
360	18412.1	2196.76	13642.3	1375.77	0.0120284	0.85934	70.0654
362	18605.6	2207.28	13845.4	1437.72	0.0118418	0.859806	68.7416
364	18802.1	2211.49	14062.8	1354.71	0.0120432	0.860327	68.3968
366	18995.1	2236.86	14216.3	1253.85	0.0121221	0.860828	68.0536
368	19186.8	2347.08	14358.5	1264.37	0.0119579	0.861237	67.5833
370	19381	2248.3	14504.2	1365.17	0.0115701	0.86157	67.0326
372	19581.6	2315	14659.2	1432.53	0.0122174	0.861968	66.4588
374	19771.5	2366.07	14824	1481.96	0.0118313	0.862337	65.4548
376	19967.5	2298.43	15024.7	1482.19	0.0115234	0.862659	64.5054
378	20168.7	2226.53	15223.4	1445.93	0.0121479	0.86296	63.8414
380	20359.5	2200.73	15409.1	1489.84	0.0123415	0.86317	63.0947
382	20547.3	2180.15	15604.5	1471.03	0.0120833	0.863358	62.5961
384	20739	2114.83	15787.2	1595.52	0.0126221	0.863483	63.3428
386	20922.5	2177.99	15896	1567.37	0.0123619	0.863646	64.0378
388	21109.8	2164.25	16006.2	1598.31	0.0116669	0.863676	64.6881
390	21308.3	2042.26	16118	1626.29	0.011645	0.863705	65.5288
392	21507.1	2016.53	16217.3	1748.61	0.0123851	0.863644	66.5781
394	21694.1	2065	16305.5	1762.55	0.0124523	0.863603	67.4563
396	21880.1	2109.26	16408.7	1737.52	0.0120695	0.863482	67.8405
398	22072	2128.01	16546.3	1715.27	0.0119004	0.863417	68.1421
400	22266.6	2135.97	16687.5	1840.15	0.0118773	0.863524	68.4773
402	22461.6	2154.83	16829.3	1828.56	0.0118933	0.864169	68.8953
404	22656.2	2208.76	16965.5	1933.41	0.0115966	0.864819	69.2268
406	22855.7	2250.52	17106.9	1946.2	0.0116954	0.865426	69.6656
408	23053.3	2283.21	17247.1	2003.14	0.0115673	0.86606	70.0324
410	23252.9	2288.86	17395.9	1969.47	0.0115209	0.866761	69.8835
412	23453.2	2319.32	17584.1	2022.74	0.0118296	0.86734	69.5807
414	23648.1	2434.84	17787.7	2231.47	0.0109467	0.868026	68.9283
416	23858.6	2504.94	18034.9	2119.9	0.0109802	0.868786	68.5414
418	24068.3	2522.06	18264.5	2166.11	0.0104066	0.869505	67.978
420	24289.3	2465.28	18498.5	2214.69	0.010268	0.870075	67.548
422	24513.1	2429.82	18726.3	2198.93	0.0104217	0.870962	68.1359
424	24733.5	2408.34	18865.4	2221.98	0.0101928	0.871621	68.9071
426	24958.6	2434.63	18989.2	2234.19	0.0103135	0.872203	69.7795
428	25180.9	2450.64	19104.2	2286.49	0.0103478	0.87298	70.6106
430	25402.3	2454.26	19221.6	2372.6	0.00978357	0.873807	70.9271
432	25636.3	2488.66	19383.3	2246.47	0.00987696	0.874705	70.534
434	25867.8	2502.97	19610.4	2324.96	0.0106292	0.875426	70.3489
436	26082.7	2336.92	19812.2	2376.44	0.0100764	0.876196	69.7376
438	26309.2	2253.41	20057.7	2253.16	0.0102087	0.876961	69.3411
440	26532.6	2292.42	20282.3	2199.29	0.0106208	0.877824	69.0157
442	26747.2	2337.87	20492.5	2203.22	0.0105604	0.878685	68.5228
444	26962.7	2175.22	20718.8	2107.91	0.0100412	0.879451	67.882
446	27189.2	2075.13	20950.7	2187.7	0.0114173	0.880305	68.0258
448	27388.2	2064.69	21121.4	2162.55	0.0116202	0.881099	67.8794
450	27583.5	2080.76	21327.3	2030.01	0.0117782	0.881891	67.7175
452	27776.1	2100.19	21533.4	2014.57	0.0110604	0.88269	67.3131
454	27980.9	2106.29	21748.4	2082.02	0.0114162	0.883479	67.2111
456	28179.2	2112.41	21939.6	2121.56	0.0111623	0.884355	67.7516
458	28381.8	2071.94	22080.1	2128.4	0.0113934	0.885269	68.7033
460	28580.1	1999.78	22186.7	2137.24	0.0123964	0.886107	69.8691
462	28762.2	2162.98	22275.3	2135.84	0.0121962	0.88697	70.7011
464	28947.1	2111.72	22392.4	2137.46	0.0120551	0.887845	71.5491
466	29133.9	2108.71	22507.9	2166.44	0.0124026	0.888703	72.1737
468	29315.4	2086.62	22642.5	2205.89	0.0119398	0.88958	71.4733
470	29503.7	2039.03	22897	2259.19	0.0115826	0.89048	70.8049
472	29697.6	1955.5	23148.1	2297.79	0.0117705	0.891355	70.2971
474	29888.2	1989.66	23387.1	2277.41	0.0119896	0.892253	69.7976
476	30075.2	2060.55	23621.1	2425.84	0.0109106	0.893156	68.1317
478	30280.4	2081.89	23978.9	2545.01	0.0108598	0.894058	66.4954
480	30486.4	2045.79	24350.8	2449.49	0.0114293	0.894953	65.0304
482	30681.9	2060.33	24711.5	2405.78	0.0117947	0.895923	63.5004
484	30871.2	2186.56	25081.8	2449.02	0.0112989	0.896879	61.748
486	31068.5	2100.88	25474.8	2455.44	0.0117641	0.897633	62.5882
488	31257.9	2032.29	25615.1	2477.11	0.0122181	0.898572	64.21
490	31440.1	2000	25671.3	2507.74	0.012253	0.899531	65.724
492	31621.6	2069.13	25738	2516.91	0.0114552	0.900568	67.019
494	31815.4	1824.17	25826.7	2542.07	0.0122387	0.901554	69.29
496	31996.7	1690.61	25813.5	2324.94	0.0130705	0.902492	69.3779
498	32166.2	1562.68	26016.8	2361.2	0.0137483	0.903411	68.1261
500	32327.3	1549.83	26360	2234.71	0.0133596	0.90414	66.6099
502	32492.9	1542.64	26723.1	2356.06	0.012845	0.905108	65.0648
504	32664.9	1532.8	27088.3	2080.42	0.0123471	0.906562	63.5276
506	32843.6	1462.02	27428	2062.6	0.0122904	0.90766	62.0989
508	33022.8	1377.42	27740.9	2099.14	0.0122108	0.908616	60.6705
510	33203.1	1282.77	28067.6	2108.88	0.0126912	0.909704	60.036
512	33376.3	1416.12	28319.5	2116.85	0.0139383	0.910618	61.5603
514	33533.9	1456.34	28376	2070.74	0.0132047	0.911496	62.6641
516	33700.1	1527.87	28469.2	2089.83	0.0132681	0.912842	63.9395
518	33865.2	1554.15	28543.7	1973.3	0.013569	0.914025	65.2712
520	34026.5	1615.99	28611.1	2022.34	0.0136227	0.914888	66.5454
522	34186.9	1615.98	28681.9	2108.13	0.0130859	0.915782	67.6807
524	34353.8	1612.29	28764	2164.2	0.0131579	0.916483	68.9649
526	34519.7	1651.38	28835.7	2222.3	0.0134522	0.917864	69.719
528	34681.7	1608.95	28947.8	2111.02	0.0129626	0.918923	68.5109
530	34849.6	1514.08	29228.6	2107.54	0.0134271	0.919808	67.5385
532	35011.5	1484.45	29492.1	2044	0.0142057	0.920739	66.6284
534	35164.4	1464.54	29759.8	1928.7	0.0143586	0.921597	65.5701
536	35315.5	1453.2	30035	2059.36	0.0137726	0.922191	65.7547
538	35473	1461.11	30214.9	2064.69	0.0141117	0.922797	66.6153
540	35626.6	1460.96	30334.7	2096.16	0.0135627	0.923646	67.2471
542	35786.3	1455.48	30474.8	2047.73	0.0141804	0.924549	68.1499
544	35938.8	1441.32	30583.4	2029.52	0.013146	0.925266	68.6622
546	36103.2	1444.47	30726.3	2074.22	0.0130933	0.925746	69.1731
548	36268.2	1454.96	30867.7	2187.97	0.0127998	0.92624	69.5478
550	36436.9	1451.62	31027.3	2123.33	0.0131391	0.926752	70.0813
552	36601.2	1439.59	31168.2	2046.65	0.0127017	0.927265	70.4133
554	36771	1456.41	31322.5	2021.97	0.012885	0.927723	70.9078
556	36938.3	1438.78	31459.8	1996.32	0.0127074	0.928203	71.3049
558	37107.9	1429.62	31604.7	2091.04	0.0130588	0.928675	71.8411
560	37272.8	1427.8	31745.9	1907.23	0.0129808	0.929129	72.2625
562	37438.6	1391.86	31893.3	1731.17	0.0133296	0.929591	72.7297
564	37600	1349.87	32029.9	1677.61	0.0136626	0.929988	73.1315
566	37757.4	1316.43	32165.3	1562.76	0.0136169	0.930291	72.2398
568	37915.3	1231.07	32393.2	1544.57	0.0142349	0.930628	71.1358
570	38066.3	1186.88	32647.6	1539.64	0.0147386	0.930989	70.0069
572	38212	1283.27	32917.5	1432.75	0.0136583	0.931304	68.4941
574	38369.3	1311.05	33221.4	1273.17	0.0134403	0.931612	67.1806
576	38529	1311.37	33487.7	1311.09	0.0139925	0.931892	69.0002
578	38682.4	1360.57	33510.2	1377.29	0.0137146	0.932322	71.5728
580	38838.8	1396.31	33476.5	1508.51	0.0135259	0.932827	72.6296
582	38997.3	1446.63	33554.6	1525.42	0.0132429	0.933688	71.5192
584	39159	1506.31	33801.1	1529.57	0.0127573	0.933215	70.3228
586	39327	1571.64	34056.5	1627.49	0.0120355	0.933016	69.0322
588	39505.1	1631.65	34319.8	1604.26	0.0113385	0.933404	67.7244
590	39694.1	1618.77	34583.3	1666.39	0.0108779	0.934034	66.4797
592	39891	1473.03	34841.6	1515.53	0.0114592	0.93436	65.5252
594	40077.8	1390.15	35070.8	1473.59	0.0118912	0.9345	64.521
596	40257.7	1345.13	35293.3	1452.08	0.011714	0.935432	63.3818
598	40440.3	1373.92	35527.6	1463.86	0.0113244	0.93505	62.1982
600	40629.1	1406.01	35773.6	1456.65	0.0111961	0.935832	61.1115
602	40820	1414.08	36005.4	1435.14	0.0111036	0.935653	60.5372
604	41012.5	1425.41	36215.3	1455.14	0.0118837	0.935914	60.336
606	41192.4	1490.38	36397.3	1454.51	0.0112729	0.936091	59.7351
608	41381.9	1520.25	36608.2	1439.08	0.0115812	0.935978	59.3364
610	41566.4	1587.49	36809.7	1460.52	0.011355	0.936527	58.7797
612	41754.5	1652.37	37018.9	1425.14	0.0109868	0.936473	58.1723
614	41948.8	1690.6	37233.5	1435.95	0.0107165	0.93692	57.8896
616	42148	1693.09	37418.9	1397.49	0.0107862	0.937386	57.9077
618	42345.8	1721.25	37577.3	1352.25	0.0111504	0.937797	58.0685
620	42537.1	1768.3	37721.5	1337.18	0.0112862	0.938419	58.4114
622	42725.9	1749.26	37851	1262.36	0.0115912	0.938819	58.8757
624	42909.7	1730.83	37970.1	1204.38	0.0121255	0.939855	59.3745
626	43085.2	1735.2	38080.6	1184.28	0.0119001	0.943085	59.6442
628	43263.4	1722.48	38193.8	1277.61	0.0119555	0.943448	59.9109
630	43440.8	1759.96	38328.2	1319.41	0.0121466	0.943519	60.1426
632	43615.3	1827.99	38469.4	1290.7	0.0123224	0.943951	59.7963
634	43787.2	1836.56	38648.3	1352.78	0.0112353	0.943982	58.9572
636	43975.8	1784.28	38866.2	1402.57	0.011046	0.944455	58.3378
638	44167.5	1727.09	39070.3	1471.16	0.0117962	0.945351	57.998
640	44346.8	1685.59	39257.5	1545.27	0.0114577	0.947462	57.6132
642	44531.1	1614.84	39452.9	1619.35	0.0117394	0.949626	57.9406
644	44710.5	1574.03	39597.6	1653.41	0.0123973	0.951703	58.6128
646	44880	1552.07	39715.6	1611.07	0.0125771	0.952078	59.1984
648	45047	1470.03	39855.4	1495.69	0.0125256	0.951776	59.7267
650	45214.8	1460.52	39998.7	1404.41	0.0138906	0.952798	60.3761
652	45365.9	1458.77	40120.4	1382.45	0.0141286	0.954472	60.6631
654	45514.2	1462.76	40266.8	1342.69	0.0141375	0.956726	60.8429
656	45662.1	1407.9	40421.1	1370.71	0.0146393	0.958622	61.0579
658	45804.6	1387.47	40579	1397.13	0.0147924	0.959588	61.1534
660	45945.5	1430.19	40754.9	1428.25	0.0139652	0.960883	61.0359
662	46094.5	1366.4	40950.1	1385.77	0.0148373	0.962006	61.23
664	46234.6	1442.25	41111.1	1488.03	0.0140715	0.963347	61.0833
666	46382.2	1482.06	41301.9	1493.54	0.0142043	0.96479	61.103
668	46528.1	1544.47	41478.6	1552.53	0.014141	0.966305	61.0416
670	46674.5	1518.26	41661.8	1625.5	0.0136376	0.967797	60.8715
672	46826	1471.67	41860.3	1683.08	0.0138728	0.969425	60.8568
674	46974.7	1469.91	42048.8	1699.1	0.0142424	0.970811	60.8663
676	47119.4	1455.85	42238.1	1687.63	0.0141916	0.972125	61.2602
678	47264.3	1446.71	42388.6	1734.6	0.0140676	0.973432	61.7998
680	47410.4	1466.1	42522	1769.52	0.01398	0.974725	62.3498
682	47557.2	1466.85	42652.9	1758.9	0.0134913	0.976021	61.8888
684	47709.1	1456.6	42872.5	1729.91	0.0131387	0.977216	61.1083
686	47864.8	1452.47	43110.5	1735.83	0.0132713	0.978299	60.3915
688	48018.9	1440.19	43344.9	1715.36	0.0130604	0.979367	59.5934
690	48175.2	1402.72	43583.5	1826.41	0.0129699	0.980396	58.7733
692	48332.5	1389.25	43822.9	1838.34	0.0137279	0.981407	57.9827
694	48481	1401.49	44080.8	1747.15	0.0133653	0.982436	56.9622
696	48633.3	1378.47	44350.4	1684.77	0.0135645	0.983396	56.0241
698	48783.2	1408.72	44612.3	1583.38	0.0137882	0.984348	55.0348
700	48930.6	1464.68	44865.3	1559.28	0.0126053	0.985307	54.1511
702	49091.6	1464.75	45101.1	1443.47	0.0126401	0.985859	54.6954
704	49252.1	1413.41	45220.7	1461.4	0.0128034	0.986215	55.2614
706	49410.5	1383.46	45328.1	1457.87	0.0138916	0.98677	56.0082
708	49556.4	1401.15	45420.2	1460.07	0.0135716	0.987223	56.4855
710	49705.7	1423.87	45531.7	1463.26	0.0131464	0.987806	56.9365
712	49859.7	1427.82	45644.2	1411.01	0.0130244	0.988263	57.4459
714	50015.1	1394.38	45749.6	1392.68	0.0136241	0.988664	58.1414
716	50163.5	1398.13	45841.1	1384.01	0.0136809	0.988997	58.7431
718	50311.4	1401.11	45938.7	1435.26	0.0140385	0.988778	59.408
720	50455.4	1455.91	46039.3	1360.35	0.0137802	0.989313	59.9527
722	50602.1	1433.22	46142.7	1371.68	0.0146176	0.989858	60.719
724	50740.4	1493.33	46227.4	1441.43	0.0141846	0.99008	61.2324
726	50882.8	1502.5	46336.1	1453.76	0.0139185	0.990374	62.4657
728	51027.9	1494.72	46392.1	1488.13	0.0139029	0.990744	63.9804
730	51173.1	1485.88	46426.8	1500.13	0.0141018	0.99084	64.8862
732	51316.2	1477.1	46506.8	1548.29	0.0139189	0.991206	64.5309
734	51461.2	1444.82	46677.3	1517.76	0.0140153	0.991492	64.5128
736	51605.1	1431.69	46828.7	1470.84	0.0146675	0.991693	64.5063
738	51742.6	1437.18	46976.9	1469.89	0.0149367	0.992121	64.5065
740	51877.6	1429.76	47119.5	1455.83	0.0143071	0.992418	64.5066
742	52018.4	1396.24	47263.1	1446.55	0.0141489	0.992469	64.5064
744	52160.8	1367.64	47408.9	1465.66	0.0146817	0.99257	66.0867
746	52298.1	1346.68	47440.1	1474.86	0.0148845	0.99307	64.4885
748	52433.4	1342.76	47705.9	1456.69	0.0152938	0.993232	62.9254
750	52565.1	1367.12	47980.4	1449.41	0.014738	0.993516	61.1741
752	52701.6	1358.41	48271.4	1379.68	0.0147387	0.993936	60.8426
754	52838.2	1317.25	48445.8	1406.97	0.0153599	0.994196	61.0667
756	52969.1	1310.71	48579	1386.2	0.0154172	0.994334	61.1834
758	53099.6	1292.8	48720.5	1366.04	0.0156074	0.994421	61.3251
760	53228.5	1284.12	48858.2	1459.71	0.0152165	0.994713	61.3565
762	53360.6	1256.27	49008.5	1470.04	0.0152094	0.995294	61.4597
764	53492.7	1225.64	49158.2	1460.51	0.0151068	0.9957	61.3109
766	53625.7	1190.2	49327.6	1375.58	0.0153105	0.995892	61.1394
768	53756.8	1189.06	49491.6	1391.17	0.0146325	0.996011	60.7997
770	53894.1	1142.4	49664.1	1417.73	0.0154847	0.996033	60.7505
772	54023.8	1076.22	49820.4	1440.8	0.0172576	0.996566	60.8508
774	54140	1122.72	49965.2	1392.91	0.01527	0.996803	60.296
776	54271.4	1186.12	50155.9	1398.54	0.014122	0.99702	60.462
778	54413.5	1157.29	50290.5	1391.35	0.0147012	0.997136	61.1614
780	54549.9	1165.96	50384.4	1435.33	0.014886	0.997536	61.7823
782	54684.6	1154.59	50482.6	1463.76	0.0152088	0.997787	62.4246
784	54816.4	1145.29	50581.1	1422.87	0.01487	0.997887	62.9358
786	54951.2	1175.78	50684.9	1474	0.0155785	0.997908	63.6464
788	55079.8	1200.83	50775	1505.41	0.0148317	0.997927	63.7131
790	55215	1232.03	50913.2	1501.68	0.0140727	0.997978	62.7769
792	55357.4	1300.23	51125.9	1488.77	0.0144899	0.998046	62.0828
794	55495.7	1272.64	51319	1476.93	0.0133583	0.998313	61.0623
796	55645.6	1238.5	51536.1	1427.91	0.0137542	0.998574	60.3589
798	55791.3	1290.92	51723.8	1438.21	0.0151175	0.998674	59.8451
800	55923.7	1307.16	51894.1	1428.85	0.0141574	0.998621	59.0327
802	56065.2	1320.98	52093.1	1376.65	0.013829	0.998199	58.8446
804	56210.1	1350.07	52247.4	1356.14	0.0143806	0.997807	58.8359
806	56349.5	1398.93	52385.6	1330.36	0.0141338	0.997452	58.6705
808	56491.3	1430.15	52530.8	1368	0.0135022	0.997081	58.4267
810	56639.9	1431.64	52684.1	1364.04	0.0136589	0.996705	58.3422
812	56786.8	1413.7	52827.9	1317.75	0.013649	0.996309	58.2296
814	56933.9	1421.31	52968.2	1310.9	0.0141069	0.995919	58.7337
816	57076.2	1441.43	53067.4	1291.04	0.0140071	0.995513	59.3054
818	57219.7	1441.18	53161.5	1296.19	0.0137599	0.995159	59.853
820	57365.7	1411.54	53257.3	1278.92	0.0145098	0.994801	60.608
822	57504.3	1405.36	53341.2	1260.01	0.0149603	0.994393	61.3035
824	57638.7	1429.05	53429.3	1243.01	0.0151672	0.994032	61.955
826	57771.4	1471.33	53520.3	1218.09	0.0149265	0.993747	62.5196
828	57906.2	1483.69	53617.1	1186.84	0.0148634	0.993351	63.1187
830	58041.7	1513.99	53711	1223.7	0.0155916	0.992713	63.86
832	58170.9	1710.29	53798.4	1157.68	0.015723	0.99227	64.4855
834	58299.1	1726.22	53894.9	1142.26	0.0154577	0.991886	65.0328
836	58429.5	1697.34	53991	1044.12	0.0155584	0.991667	65.6544
838	58559.1	1664.11	54075.7	1127.1	0.0158217	0.991638	66.2815
840	58686.6	1641.96	54158	1121.5	0.0158988	0.991491	66.7394
842	58813.5	1634.38	54260.2	1189.57	0.0166653	0.991229	67.3288
844	58934.6	1640.69	54361.1	1158.69	0.0168807	0.991109	67.8276
846	59054.1	1680.38	54466.4	1155.89	0.0158843	0.991263	68.1495
848	59181.1	1722.55	54579.9	1169.58	0.0167094	0.991504	68.8525
850	59301.8	1697.69	54666.6	1156.63	0.0155867	0.991797	68.8164
852	59431.2	1663.4	54799.8	1141.54	0.0149742	0.992053	67.7643
854	59565.8	1647.35	55001	1187.04	0.0152768	0.992361	66.8794
856	59697.8	1641.62	55190.1	1220.11	0.0156119	0.992656	65.9682
858	59826.8	1634.77	55393.1	1317.32	0.0156821	0.992954	64.9804
860	59955.3	1616.02	55606.5	1224.4	0.0158692	0.993296	64.0191
862	60082.1	1619.15	55818.4	1300.69	0.0159173	0.993321	62.9421
864	60208.6	1752.43	56028.3	1313.57	0.0147774	0.993355	62.0506
866	60344.9	1782.08	56235.3	1355.13	0.0141199	0.993384	61.3896
868	60487.5	1807.91	56421.6	1426.58	0.0142036	0.993402	60.8757
870	60629.2	1841.44	56604.7	1435.94	0.0137901	0.993395	60.2576
872	60775.2	1843.44	56797.1	1412.44	0.0139563	0.993406	59.7442
874	60919.5	1833.03	56980.1	1424.32	0.0141328	0.993409	59.22
876	61061.9	1826.27	57160.2	1456.38	0.0144289	0.993469	59.1941
878	61201.4	1872.66	57306.7	1418.92	0.0146342	0.99353	59.3094
880	61339	1891.64	57440.1	1402.22	0.013878	0.993534	59.2466
882	61484.1	1904.98	57580.7	1409.11	0.0136567	0.993545	59.2974
884	61631.5	1927.7	57710.7	1453.78	0.0138685	0.993611	59.4487
886	61776.6	1937.83	57834.1	1489.49	0.0136104	0.993682	59.5126
888	61924.5	1950.82	57964.7	1478.99	0.0135691	0.993696	60.0247
890	62072.8	2015.41	58064.5	1524.38	0.0133448	0.993638	61.7027
892	62223.6	2002.24	58086.2	1564.25	0.0124548	0.993569	63.2192
894	62385.3	1953.39	58118.4	1608.33	0.013006	0.993574	65.0545
896	62540	1938.2	58129.8	1646.04	0.0132267	0.993554	66.7919
898	62692.2	1923.93	58147.5	1673.31	0.0129749	0.993434	68.4065
900	62847.4	1894.79	58173.6	1714.63	0.0128303	0.993379	70.0539
902	63004.3	1922.72	58197.1	1746.41	0.0134106	0.993106	69.2771
904	63154.5	1938.95	58377.4	1710.71	0.0128401	0.9927	67.3325
906	63311.4	1983.88	58633	1645.17	0.0126129	0.9919	65.0987
908	63471.2	2030.58	58900	1629.21	0.012128	0.990478	62.3962
910	63637.7	1998.94	59193.1	1726.52	0.0117294	0.989242	59.961
912	63810.1	2004.38	59477.3	1651.19	0.0121908	0.988525	58.104
914	63976.1	2029.11	59734.1	1640.04	0.0122941	0.98786	58.2218
916	64140.7	2070.78	59858	1633	0.012294	0.987151	59.0513
918	64305.5	2006.55	59936.5	1618.83	0.0131138	0.986411	60.0691
920	64460.2	1953.67	60002.7	1608.93	0.0133594	0.985585	60.9723
922	64612	1927.59	60076.2	1611.64	0.0133712	0.984783	61.8361
924	64763.9	1915.05	60152	1707.69	0.0130299	0.984003	62.6275
926	64919.9	1928.38	60234.1	1772.59	0.0129704	0.98324	62.1977
928	65076.7	2000.9	60405.1	1787.24	0.0122746	0.982442	61.1948
930	65242.6	2041.73	60620.7	1841.33	0.0122632	0.981646	60.3542
932	65408.7	2099.14	60829.6	1844.18	0.0120353	0.980993	59.4659
934	65578.1	2155.03	61038	1818.33	0.0119479	0.980409	58.6209
936	65748.9	2154.18	61237.7	1884.73	0.0116047	0.979795	57.7203
938	65924.8	2070.45	61443.9	1898.79	0.0116645	0.979017	57.0825
940	66099.9	1972.66	61639.8	1928.99	0.0121265	0.97839	57.0368
942	66268.5	1957.1	61791.1	1938.77	0.012005	0.977592	56.8691
944	66438.9	1995.3	61954.5	1953.54	0.0110812	0.976945	56.5211
946	66623.6	1917.77	62131.8	2046.26	0.0119914	0.976207	56.6003
948	66794.5	1987.57	62283.9	1973.34	0.0112764	0.975634	56.3172
950	66976.3	1950.84	62466.9	1937.31	0.0118404	0.975078	56.1977
952	67149.5	2013.6	62631.6	1939.32	0.0125884	0.974437	55.7297
954	67312.6	2049.81	62823.7	1890.58	0.0117586	0.973379	54.958
956	67487.3	2053.01	63042.2	1929.46	0.011856	0.972586	54.4884
958	67660.7	2064.31	63233.3	1945.62	0.0121492	0.971996	54.0973
960	67830.1	2118.1	63424.7	2039.43	0.0118994	0.971491	53.5155
962	68003.1	2160.25	63638.6	1998.77	0.0117517	0.970863	52.8831
964	68178.4	2213.95	63864.7	2006.16	0.0115933	0.970315	52.6045
966	68356.2	2203.9	64054.9	2045.35	0.011249	0.969796	53.353
968	68539.5	2231.73	64162	2077.09	0.0116015	0.96915	54.2464
970	68717.4	2213.08	64258.3	2010.96	0.0112803	0.968511	54.9876
972	68900.5	2219.18	64363	2001.17	0.0117747	0.968266	55.9016
974	69075.9	2224.27	64450.3	1956.82	0.0113752	0.967994	56.608
976	69257.5	2090.33	64551.6	1924.49	0.0114906	0.967712	57.0445
978	69437.4	1979.22	64672.6	1930.69	0.0134837	0.967642	57.7534
980	69590.7	1959.05	64772.9	1913.51	0.0137668	0.967584	58.0996
982	69740.8	1971.99	64903.1	1919.51	0.013391	0.967297	58.3063
984	69895.2	1992.21	65045.4	1994.4	0.0122824	0.966979	58.336
986	70063.6	1931.41	65208.6	2028.29	0.0123908	0.966704	58.6386
988	70230.6	1939.6	65351.7	2084.91	0.0129675	0.966612	59.1069
990	70390.2	1926.62	65482.1	2117.46	0.0120238	0.966442	59.426
992	70562.3	1883.57	65626.6	2174.02	0.012293	0.96612	60.0077
994	70730.7	1854	65751.1	2153.82	0.0125991	0.965981	60.5906
996	70895	1763.37	65878.2	2109.85	0.0139128	0.965898	61.3872
998	71043.8	1732.38	65986.6	2018.11	0.0145126	0.965789	62.0252
1000	71186.5	1715.24	66108.1	1969.39	0.0146011	0.965701	62.5612
1002	71328.4	1722.58	66233.5	1940.62	0.0145898	0.965552	63.0798
1004	71470.3	1716.41	66361.6	2000.94	0.0143661	0.965396	63.5565
1006	71614.5	1704.06	66498.3	1990.96	0.0152683	0.965211	64.2712
1008	71750.3	1712.62	66620.4	1915.55	0.0157924	0.965051	64.9073
1010	71881.5	1760.17	66739.9	1997.26	0.0157802	0.964892	65.4409
1012	72012.8	1765.95	66872.4	1973.75	0.0148821	0.964748	65.7892
1014	72152.1	1801.02	67022.2	1940.72	0.0153061	0.964617	65.7598
1016	72287.6	1842.66	67195.7	2040.06	0.0150137	0.964227	65.3599
1018	72425.7	1913.71	67398	2056.95	0.0147132	0.963822	64.9492
1020	72566.8	2009.86	67608.8	2047.66	0.0139859	0.963379	64.4264
1022	72715.2	2018.05	67824.4	2116.72	0.0143114	0.962962	64.1279
1024	72860.3	1920.6	68024.8	2165.53	0.0155355	0.962552	64.0091
1026	72994.1	1921.31	68212.9	2224.81	0.015276	0.961963	63.9685
1028	73130.2	1971.72	68398.8	2197.69	0.0147116	0.961287	63.9597
1030	73271.6	1882.78	68585.5	2242.83	0.0134608	0.96055	63.687
1032	73426.3	1859.77	68793	2196.04	0.0146358	0.959761	63.9411
1034	73568.7	1844.65	68955.9	2231.12	0.0142431	0.958874	63.8521
1036	73715.1	1846.03	69146.2	2220.26	0.0145188	0.958041	63.9122
1038	73858.9	1803.7	69326.7	2009.58	0.0142397	0.957046	63.7344
1040	74005.7	1759.07	69514.3	1958.13	0.0151699	0.95593	63.4343
1042	74143.6	1820.29	69692.9	1960.28	0.0163819	0.955324	63.1972
1044	74271.4	1809.15	69866.4	2002.63	0.0145965	0.955279	62.3731
1046	74414.8	1785.26	70098.4	1918.86	0.0153009	0.955197	62.0616
1048	74551.6	1777.78	70288	1948.59	0.0155143	0.955121	61.6578
1050	74686.6	1777.51	70485.6	1906.1	0.0155574	0.955121	61.9723
1052	74821.2	1755.57	70630.4	1863.54	0.0158944	0.955122	62.6031
1054	74953	1732.35	70747.6	1852.38	0.0157086	0.955191	63.2523
1056	75086.2	1691.75	70860.7	1762.25	0.0163014	0.95475	64.2126
1058	75214.7	1657.25	70946.6	1765.05	0.0168667	0.95461	65.187
1060	75339	1651.97	71026.8	1735.2	0.016235	0.954329	65.9373
1062	75468.1	1635.57	71120.5	1719.65	0.0161324	0.953734	66.5061
1064	75598	1623.88	71227	1712.53	0.0162596	0.953199	66.25
1066	75727.1	1640.37	71388.7	1728.57	0.0167383	0.952811	66.0403
1068	75852.5	1649.16	71547.9	1704.85	0.0157216	0.952497	65.5066
1070	75986	1644.62	71723.5	1702.78	0.015727	0.952105	65.1495
1072	76119.6	1649.82	71879.6	1760.08	0.0159284	0.951602	64.8423
1074	76251.6	1677.32	72033.4	1766.85	0.0150559	0.951234	64.3636
1076	76391.2	1711.87	72204.6	1816.13	0.014759	0.950939	64.8109
1078	76533.7	1695.13	72313.1	1850.8	0.0136173	0.950592	65.3828
1080	76688.2	1672.42	72415.2	1903.73	0.0131252	0.950262	66.1467
1082	76848.6	1676.58	72506.4	1990.1	0.0143116	0.95002	67.303
1084	76995.7	1681.56	72571.3	2011.33	0.0138119	0.949803	68.1118
1086	77148.1	1671.98	72663.8	2012.34	0.0132196	0.950622	69.2904
1088	77307.3	1661.52	72724.7	2019.11	0.0130568	0.951249	70.3276
1090	77468.3	1642.85	72795.1	1930.15	0.0153501	0.951855	71.0751
1092	77605.2	1624.9	72883.5	1917.2	0.0131954	0.952007	70.839
1094	77764.4	1619.67	73032.2	1922.73	0.0134624	0.95212	71.0668
1096	77920.4	1618.58	73153.9	1983.6	0.0138694	0.952725	71.2296
1098	78071.8	1603.83	73282.3	1873.65	0.013564	0.95314	71.1689
1100	78226.5	1593.92	73438.1	1858.63	0.0151264	0.954196	71.4019
1102	78365	1603.12	73559.3	1844.56	0.0150141	0.954592	71.1298
1104	78504.6	1608.63	73722.3	1846.1	0.0150173	0.95498	70.9073
1106	78644	1630.21	73879.8	1797.22	0.0143793	0.956035	70.6183
1108	78789.5	1621.97	74039.2	1748.91	0.0146698	0.956867	70.5848
1110	78932	1600.19	74172.9	1840.38	0.0145428	0.957705	70.491
1112	79075.6	1652.48	74306.5	1797.99	0.0157079	0.955302	70.1359
1114	79208.9	1662.32	74483.2	1777.22	0.0132167	0.951138	69.5133
1116	79368	1627.2	74678.7	1778.83	0.0136044	0.947986	69.8522
1118	79523.1	1605.01	74806.5	1757.41	0.015528	0.944364	70.4856
1120	79659.5	1612.59	74915.8	1743.8	0.015264	0.940535	70.5445
1122	79798.8	1613.19	75063	1698.46	0.0152494	0.93685	70.6179
1124	79938.8	1618.94	75204.6	1657.66	0.0150908	0.933738	70.7372
1126	80080.7	1623.83	75335.9	1652.37	0.0154186	0.932151	70.5299
1128	80219.9	1596.93	75484.7	1633.46	0.0169	0.930557	70.4708
1130	80347	1606.62	75625.3	1621.58	0.0161444	0.929004	70.1225
1132	80480.4	1589.21	75780.8	1650.28	0.0170242	0.927631	70.12
1134	80607	1581.61	75916.2	1648.17	0.0167013	0.926466	69.8676
1136	80736.3	1574.16	76070.9	1640.3	0.0168207	0.92544	69.704
1138	80864.8	1566.7	76218.1	1669.05	0.0169695	0.924659	69.0527
1140	80992.2	1558.82	76401.9	1714.51	0.0175338	0.923938	67.0097
1142	81115.7	1592.18	76695.2	1671.39	0.017872	0.923182	64.9288
1144	81236.9	1600.66	77000.2	1681.71	0.0156023	0.922479	62.3733
1146	81375.9	1600.67	77344.5	1659.08	0.016046	0.921956	60.2876
1148	81511	1614.48	77638.4	1620.54	0.0159719	0.921569	58.1229
1150	81646.9	1596.71	77953.4	1618.36	0.017538	0.921465	57.0395
1152	81770.7	1572.94	78183.2	1590.17	0.018712	0.920981	58.2492
1154	81886.7	1573.63	78251	1596.04	0.0182747	0.920906	59.2132
1156	82005.6	1579.69	78328.3	1601.26	0.016984	0.920803	60.0214
1158	82133.5	1573.61	78416.1	1605.71	0.0172031	0.920797	61.0723
1160	82259.7	1568.87	78488.2	1608.88	0.0178192	0.920908	62.1968
1162	82381.6	1567.03	78555	1607.86	0.0170015	0.921196	63.0701
1164	82509.3	1582.22	78637.1	1630.49	0.0182941	0.921037	63.2807
1166	82628	1584.26	78768.9	1625.12	0.0173015	0.920976	62.751
1168	82753.5	1578.21	78946.9	1597.91	0.0166115	0.920991	62.2745
1170	82884.2	1584	79118.6	1670.73	0.0174603	0.921185	62.0825
1172	83008.6	1589.51	79273.4	1656.3	0.0174487	0.921382	61.748
1174	83133	1580.83	79453.8	1600.82	0.0187828	0.921248	61.6452
1176	83248.6	1565.62	79605.5	1610.01	0.0204816	0.921115	62.2681
1178	83354.6	1595.37	79704.3	1614.74	0.0187622	0.920938	62.646
1180	83470.3	1592.44	79820.2	1612.84	0.0185752	0.920752	63.2438
1182	83587.3	1578.36	79922.5	1619.13	0.0196189	0.921096	64.0182
1184	83697.9	1587.22	80012.1	1618.08	0.0198178	0.922013	64.6518
1186	83807.4	1585.79	80107.8	1626.11	0.0191005	0.922859	65.1281
1188	83920.9	1586.3	80212.6	1595.84	0.0199931	0.923424	65.5477
1190	84029.2	1599.27	80313.4	1611.06	0.0204875	0.923807	65.0028
1192	84134.9	1619.87	80477	1589.41	0.0197758	0.92374	64.2362
1194	84244.3	1634.49	80649.8	1579.05	0.0188024	0.923574	63.4039
1196	84359.5	1664.85	80828.9	1568.92	0.0187746	0.92369	62.7199
1198	84474.8	1664.48	80996.3	1558.56	0.0190283	0.923309	62.1079
1200	84588.7	1660.03	81155.4	1603.36	0.0188554	0.922927	61.4287
1202	84703.6	1653.8	81327.6	1597.66	0.0185609	0.921906	62.2618
1204	84820.5	1641.27	81416.4	1603.2	0.0183565	0.920601	63.6198
1206	84938.8	1628.18	81472.6	1608.12	0.0172376	0.919155	64.8293
1208	85065.1	1615.89	81539	1619.12	0.017903	0.917902	66.358
1210	85186.8	1613.08	81585.1	1634.68	0.0179725	0.916744	67.7822
1212	85308.2	1602.31	81637.5	1601.21	0.0177313	0.915119	69.1497
1214	85431.4	1583.12	81691.5	1575.45	0.0174959	0.913474	68.8034
1216	85556.6	1582.42	81837.4	1570.82	0.0186771	0.911351	68.1525
1218	85674.1	1586.47	81999	1580.01	0.0173885	0.909385	67.0536
1220	85800.5	1594.29	82198	1570.53	0.0179961	0.907615	66.2863
1222	85923	1586.3	82371.7	1565.85	0.0174708	0.90565	65.2957
1224	86049.4	1593.75	82560.6	1588.33	0.0178278	0.903499	64.4526
1226	86173.6	1609.07	82738.9	1577.57	0.0174141	0.901258	61.3342
1228	86301	1612.93	83053.5	1591.5	0.0166181	0.898945	62.4578
1230	86434.9	1610.61	83123.9	1578.83	0.0163417	0.89653	63.6781
1232	86571.4	1608.41	83185.6	1592.39	0.016299	0.89388	64.9591
1234	86708.7	1606.36	83244.8	1565.48	0.0163133	0.8916	66.2737
1236	86846.2	1597.4	83296.8	1567.48	0.0162976	0.889317	67.6047
1238	86984.1	1582.13	83348.1	1594.88	0.0169686	0.887564	68.6092
1240	87116.9	1586.71	83418.5	1600.28	0.0174126	0.884271	68.1555
1242	87246.8	1614.5	83571.6	1577.11	0.0163507	0.880926	67.3988
1244	87385.7	1637.91	83732.2	1589.96	0.0152174	0.879619	66.8402
1246	87535.1	1620.44	83875.8	1582	0.015904	0.877735	66.6347
1248	87678.4	1605.62	84002.8	1594.12	0.0153854	0.875996	66.2008
1250	87826.8	1578.68	84135.3	1619.96	0.0150689	0.875644	66.2038
1252	87978.3	1630.45	84246	1634.71	0.015671	0.875327	67.5136
1254	88124.1	1622.76	84296.4	1653.76	0.0139538	0.872711	68.3785
1256	88288.4	1623.81	84378.3	1668.15	0.0144579	0.871009	69.7506
1258	88447.2	1619.38	84431.4	1662.75	0.0143528	0.87067	70.9716
1260	88607.2	1596.66	84486.6	1664.95	0.0145091	0.868935	72.2438
1262	88765.9	1575.71	84544.6	1668.08	0.0155469	0.867337	73.6861
1264	88914.2	1588.45	84593.8	1659.1	0.0151544	0.86588	74.6146
1266	89066.6	1590.69	84668.7	1655.26	0.0149801	0.864731	75.5415
1268	89221	1614.41	84743.2	1652.14	0.0147099	0.862213	75.8343
1270	89378.7	1571.49	84856.9	1636.16	0.0139893	0.861345	74.2102
1272	89544.7	1554.35	85069.9	1615.42	0.0160904	0.860228	73.2502
1274	89689.2	1558.65	85246.7	1611.87	0.0164666	0.858675	71.8974
1276	89830.6	1563.25	85447.9	1580.55	0.0162102	0.856643	70.9448
1278	89974.7	1600.63	85628.6	1583.65	0.0151805	0.855941	70.0121
1280	90128.6	1612.85	85805.1	1594.57	0.0151664	0.853783	69.3051
1282	90283	1600.91	85975.3	1582.62	0.0148758	0.852765	68.5412
1284	90440.7	1598.46	86145.6	1608.22	0.0156636	0.851596	68.0078
1286	90590.6	1584.72	86306.7	1613.1	0.0152917	0.850427	67.2242
1288	90744.4	1575.33	86491.6	1609.51	0.0145302	0.849897	66.5337
1290	90906.4	1579.33	86671.1	1607.02	0.0160253	0.850108	66.8262
1292	91053.2	1570.02	86790.5	1604.91	0.0154349	0.849948	66.6949
1294	91205.6	1572.09	86936.7	1585.19	0.0157861	0.850049	66.7479
1296	91354.7	1583.45	87067.9	1576.72	0.0147778	0.848977	66.518
1298	91514.1	1594.83	87216.2	1606.9	0.01517	0.847729	66.5698
1300	91669.6	1631.06	87355.6	1641.49	0.0152335	0.846673	66.4633
1302	91824.7	1629.01	87514.7	1622.54	0.0144041	0.846464	65.9757
1304	91988.7	1631.4	87689.8	1604.44	0.0154698	0.847904	65.876
1306	92141.2	1588.03	87837.6	1576.63	0.0170666	0.847642	65.8613
1308	92279.4	1585.85	87991	1635.28	0.017145	0.846807	65.6024
1310	92417.2	1610.91	88160.9	1619.31	0.0157206	0.846228	65.0653
1312	92567.5	1612.21	88363	1626.45	0.0151155	0.845744	64.6918
1314	92724	1583.3	88550.2	1610.73	0.0165089	0.845983	64.6079
1316	92867.2	1587.57	88713.8	1570.38	0.0166293	0.846344	64.2424
1318	93009.3	1600.65	88886.7	1588.05	0.0158732	0.846277	63.7193
1320	93158.2	1588.39	89072.5	1590.78	0.0165078	0.846677	63.4555
1322	93301.3	1601.47	89242.6	1617.85	0.0166516	0.846765	63.122
1324	93443.1	1611.13	89424.4	1555.93	0.0157339	0.847005	62.6101
1326	93593.2	1597.46	89614.7	1553.44	0.0162114	0.847319	62.9808
1328	93738.8	1589	89734.1	1561.79	0.0171227	0.847638	63.6589
1330	93876.6	1591.76	89833.5	1563.3	0.016642	0.847933	64.1176
1332	94018.3	1584.86	89948.2	1599.8	0.0167895	0.848343	64.7008
1334	94158.7	1584.14	90060.2	1603.33	0.0171493	0.847979	65.2311
1336	94296.3	1593.34	90181.5	1620.22	0.0169703	0.847334	65.6047
1338	94435.3	1578.03	90315.4	1594.75	0.0166131	0.846398	65.6238
1340	94577.6	1585.78	90474.9	1599.47	0.017533	0.84533	64.9133
1342	94712.5	1596.85	90677.3	1573.67	0.0170684	0.844291	63.9528
1344	94851.3	1599.41	90906.8	1579.34	0.0164348	0.84328	62.9666
1346	94995.6	1594.64	91121.9	1565.64	0.0164062	0.842183	62.0926
1348	95140.4	1595.94	91332.8	1581.89	0.0167534	0.840929	61.2775
1350	95282.3	1611.42	91550.6	1597.43	0.0160485	0.839669	61.2517
1352	95430.7	1630.18	91713.7	1643.52	0.0160676	0.838213	61.6435
1354	95579.2	1648.5	91851.7	1625.47	0.015215	0.836777	61.8543
1356	95736.3	1648.1	92007.1	1632.2	0.0159858	0.834934	62.3662
1358	95886.2	1675.75	92135.7	1588.14	0.0149443	0.832861	62.4832
1360	96046.9	1648.61	92276.7	1585.31	0.0158655	0.830775	62.926
1362	96198.6	1631.71	92398.1	1609.31	0.016913	0.828347	63.3548
1364	96341.4	1678.24	92531.5	1620.43	0.0157811	0.826245	63.3789
1366	96494.7	1706.6	92695.3	1583.09	0.0149693	0.824143	63.4469
1368	96656.9	1684.64	92846.5	1584.2	0.0158407	0.821808	63.8774
1370	96810.5	1666.49	92974.1	1604.98	0.0158913	0.819266	64.2165
1372	96964.1	1643.13	93112.7	1587.91	0.0170686	0.816682	64.7683
1374	97107.6	1643.37	93237.2	1589.22	0.0165686	0.813953	65.0163
1376	97255.9	1667.15	93377.8	1616.12	0.015462	0.811079	64.9905
1378	97415.4	1667.84	93539.7	1603.75	0.015782	0.808311	65.1846
1380	97572.2	1672.87	93688.6	1586.23	0.0161037	0.805362	65.3812
1382	97726.4	1673.2	93831.4	1594.11	0.0153771	0.802647	65.3782
1384	97888.4	1667.35	93984.6	1586.15	0.0157872	0.800275	65.5987
1386	98046.7	1667.92	94123.8	1580.85	0.0158131	0.796348	65.6329
1388	98205.5	1663.4	94277.9	1595.36	0.0158512	0.791564	65.5786
1390	98364.9	1652.51	94441.8	1577.32	0.0157039	0.7869	65.5026
1392	98526.8	1653.88	94608.3	1587.69	0.0162991	0.782197	65.5997
1394	98683.6	1656.1	94760.3	1601.05	0.0162585	0.777541	65.5795
1396	98841.9	1653.28	94924.1	1598.1	0.0158279	0.773756	65.4793
1398	99005.2	1646.11	95092.2	1589.97	0.0156421	0.769597	65.4234
1400	99171.3	1639.66	95257.5	1610.47	0.0165693	0.7656	66.419
1402	99329	1642.14	95367.6	1614.68	0.0159328	0.762034	67.3787
1404	99493.7	1641.1	95479.4	1642.13	0.0157342	0.759051	68.4161
1406	99661.1	1639.87	95584.6	1648.84	0.0159194	0.755754	69.525
1408	99827.4	1640.85	95693.6	1632.95	0.0157456	0.753376	70.5516
1410	99996	1637.15	95799.9	1670.63	0.0160256	0.750777	71.6727
1412	100162	1630.26	95901.4	1676.66	0.0162404	0.747799	72.7303
1414	100327	1626.93	96015.7	1654.75	0.0166528	0.744026	73.7016
1416	100488	1625.4	96135.2	1631.22	0.0170113	0.742465	74.7626
1418	100647	1614	96233.7	1631.99	0.016654	0.741526	75.6582
1420	100809	1617.88	96334	1675.44	0.0174824	0.737465	76.8154
1422	100964	1635.88	96445	1717.88	0.017354	0.733093	77.7584
1424	101121	1650.16	96575.5	1688.28	0.0177662	0.731339	77.7872
1426	101275	1670.04	96742.2	1680.83	0.0177626	0.731136	77.3776
1428	101429	1673.84	96920.1	1643.48	0.017017	0.730464	76.8006
1430	101590	1666.94	97100.4	1642.03	0.0176628	0.735344	76.538
1432	101744	1680.59	97235	1667.06	0.0177902	0.732906	76.166
1434	101897	1694.36	97429.3	1667.9	0.0168866	0.726799	75.5652
1436	102060	1687.19	97655.4	1675.76	0.0168125	0.724744	74.343
1438	102224	1685.6	97897.9	1667.01	0.0175259	0.724684	73.0341
1440	102382	1695.96	98131.9	1668.43	0.0166247	0.723144	71.3875
1442	102548	1687.97	98395.4	1650.43	0.0173052	0.721263	70.0839
1444	102708	1709.26	98640.6	1656.87	0.0162382	0.72182	68.4253
1446	102879	1724.4	98891.6	1652.39	0.0162355	0.723137	67.0206
1448	103049	1777.66	99132.7	1639.05	0.0154028	0.724162	65.4814
1450	103229	1805.63	99376.8	1642.89	0.0156081	0.723507	64.5671
1452	103406	1824.52	99601.3	1639.46	0.0156109	0.722522	63.7517
1454	103583	1848.92	99822.2	1640.96	0.0159846	0.721827	63.0101
1456	103756	1890.77	100039	1636.21	0.0162993	0.722176	62.2533
1458	103926	1963.38	100248	1626.11	0.016444	0.723659	61.4656
1460	104094	2037.73	100450	1628.19	0.016233	0.72466	60.6184
1462	104264	2016.59	100653	1613.58	0.0164541	0.725945	59.8518
1464	104432	1981.75	100851	1619.06	0.0166394	0.728395	60.5883
1466	104597	1972.34	100953	1634.45	0.0169425	0.730524	61.8407
1468	104758	1953.8	101029	1644.96	0.0163457	0.73257	62.9205
1470	104925	1906.36	101114	1649.37	0.0166425	0.734461	64.1825
1472	105089	1916.41	101187	1657.19	0.0173122	0.736286	65.5578
1474	105246	1981.31	101254	1664.47	0.0173531	0.737841	66.8066
1476	105402	1922.53	101329	1684.69	0.0169369	0.739308	66.6831
1478	105562	1888.91	101485	1667.7	0.017743	0.740427	66.3664
1480	105714	1852.44	101656	1666.46	0.0181369	0.741949	66.0174
1482	105863	1812.51	101822	1693.16	0.0184691	0.743724	65.6996
1484	106008	1794.29	101990	1695.83	0.019851	0.74554	65.5477
1486	106143	1826.64	102153	1675.78	0.0187373	0.746809	65.0579
1488	106286	1853.02	102336	1700.94	0.0177701	0.74792	64.7688
1490	106437	1856.71	102511	1682	0.0181568	0.748898	64.7187
1492	106584	1879.06	102671	1707.91	0.0177476	0.749781	64.4972
1494	106734	1874.76	102848	1714.31	0.0171123	0.750683	64.213
1496	106890	1859.76	103032	1774.85	0.017816	0.751659	64.1478
1498	107039	1888.4	103209	1803.56	0.018228	0.752614	63.6532
1500	107185	1923.77	103414	1825.41	0.0173255	0.753614	62.8334
1502	107338	1945.01	103639	1856.73	0.0159784	0.754402	62.3483
1504	107504	1959.79	103838	1914.56	0.0157887	0.75507	63.2592
1506	107672	1966.78	103946	1974.33	0.01583	0.755454	64.2442
1508	107839	1970.34	104050	2034.28	0.0155419	0.755871	65.1889
1510	108009	1960.8	104156	2042.49	0.0155068	0.756231	65.772
1512	108180	1970.1	104286	2011.36	0.0157444	0.756291	65.1497
1514	108348	1960.61	104492	1969.53	0.01583	0.756828	64.4494
1516	108515	1941.63	104696	1974.99	0.0160149	0.757149	63.7499
1518	108680	1929.71	104903	1904.99	0.0162906	0.756736	63.0581
1520	108842	1910.01	105111	1917.77	0.0162922	0.756203	64.5096
1522	109004	1915.08	105185	1947.1	0.016127	0.756158	66.6496
1524	109168	1866.28	105215	1967.05	0.0155781	0.755128	68.6883
1526	109338	1849.51	105256	1986	0.0163281	0.754295	70.9454
1528	109501	1834.2	105284	1981.4	0.0165599	0.753619	71.9415
1530	109661	1807.28	105385	1926.09	0.0162958	0.751986	71.1068
1532	109824	1793.43	105602	1880.44	0.017083	0.750582	70.7618
1534	109980	1791.8	105780	1835.96	0.0172283	0.747139	70.41
1536	110136	1793.61	105964	1783.74	0.0171892	0.74608	70.333
1538	110292	1783.46	106111	1818.94	0.0172134	0.745513	70.3582
1540	110447	1772.73	106254	1853.22	0.017258	0.743419	70.3975
1542	110603	1766.52	106412	1852.24	0.0169901	0.742998	70.3298
1544	110762	1758.33	106565	1879.48	0.0162401	0.742633	70.2471
1546	110928	1747.42	106722	1875.97	0.016755	0.740768	70.1668
1548	111089	1741.76	106892	1859.6	0.0171966	0.740143	70.0131
1550	111246	1740.88	107052	1890.96	0.0172022	0.739714	69.6229
1552	111403	1742.44	107223	1933.23	0.017211	0.73853	68.1487
1554	111560	1745.31	107477	1959.21	0.0169755	0.738228	68.9644
1556	111720	1746.12	107596	1961.75	0.0162507	0.73775	68.6507
1558	111887	1739.99	107785	1974.21	0.0167341	0.736289	68.2409
1560	112049	1732.38	107989	1959.66	0.0168996	0.734997	67.5886
1562	112210	1725.37	108207	1971.58	0.0168876	0.734251	68.7766
1564	112371	1719.97	108306	1965.82	0.0169362	0.734248	68.5924
1566	112532	1721.77	108485	1943.63	0.017156	0.73311	68.3179
1568	112691	1725.86	108673	1931.27	0.0166671	0.731079	69.9943
1570	112855	1712.33	108747	1914.61	0.0167116	0.72899	70.4737
1572	113020	1707.2	108893	1907.55	0.0175868	0.727386	71.0348
1574	113176	1705.93	109032	1916.91	0.0178609	0.725225	71.5984
1576	113330	1710.8	109175	1863.92	0.0178073	0.722419	71.7275
1578	113486	1717.45	109353	1848.2	0.017324	0.719711	72.3722
1580	113646	1714.35	109494	1835.39	0.0168355	0.717207	71.9051
1582	113812	1702.94	109696	1801.4	0.0178947	0.714538	71.9145
1584	113968	1702.38	109872	1790.46	0.0180692	0.71158	71.5862
1586	114124	1706.63	110063	1792.82	0.0180019	0.708787	72.1271
1588	114281	1719.81	110204	1794.35	0.0180798	0.706136	72.6689
1590	114437	1718.61	110345	1776.8	0.0172595	0.703415	69.5355
1592	114602	1709.28	110690	1763.09	0.0172914	0.699726	67.1951
1594	114767	1697.59	111007	1742.21	0.0179691	0.6965	65.0965
1596	114927	1702.83	111298	1740.59	0.018852	0.693577	64.5251
1598	115080	1695.64	111501	1744.16	0.0180103	0.690569	64.4556
1600	115241	1683.38	111679	1747.62	0.0198413	0.688285	63.3754
1602	115387	1683.39	111918	1738.86	0.020588	0.685951	62.2832
1604	115529	1686.85	112152	1727.32	0.0205699	0.683549	60.1765
1606	115671	1694.2	112441	1717.63	0.0204731	0.681055	59.1826
1608	115815	1708.08	112667	1727.87	0.0198561	0.679195	58.7603
1610	115963	1713.77	112863	1711.72	0.0189119	0.677497	58.5687
1612	116119	1715.03	113045	1706.48	0.0196095	0.676007	58.315
1614	116270	1712.57	113221	1705.74	0.0198783	0.674574	58.0241
1616	116419	1709.1	113397	1713.88	0.0200335	0.673407	57.736
1618	116567	1708.93	113576	1721.07	0.0202397	0.672208	57.4361
1620	116714	1708.68	113761	1703.4	0.0203169	0.671179	57.211
1622	116861	1705.2	113937	1701.82	0.0207052	0.670367	57.0628
1624	117005	1697.58	114104	1704.86	0.0216578	0.669849	56.906
1626	117143	1693.28	114271	1719.88	0.0225323	0.66906	56.6326
1628	117276	1693.81	114446	1718.54	0.0226089	0.668287	56.323
1630	117408	1690.51	114632	1707.51	0.0223694	0.667712	56.0979
1632	117542	1688.46	114811	1694.42	0.0228342	0.667287	55.7831
1634	117673	1686.35	114986	1707.13	0.0224977	0.667159	55.6598
1636	117806	1685.58	115150	1687.08	0.0238036	0.667381	55.7496
1638	117932	1691.01	115299	1681.01	0.0229769	0.667486	56.0383
1640	118063	1695.11	115429	1684.52	0.0225969	0.66789	56.4182
1642	118195	1703.69	115552	1687.38	0.0229862	0.669099	56.9426
1644	118325	1698.59	115664	1693.58	0.0242629	0.671328	57.4402
1646	118448	1701.1	115774	1703.27	0.024754	0.673211	57.8228
1648	118568	1700.33	115894	1717.59	0.0240787	0.674825	58.3129
1650	118691	1701.65	116014	1710.96	0.0242661	0.67665	58.9365
1652	118813	1693.25	116128	1715.39	0.0256078	0.679328	59.424
1654	118928	1695.58	116242	1713.44	0.0257278	0.68127	59.5419
1656	119042	1708.97	116377	1709.23	0.0238897	0.682077	59.5558
1658	119165	1698.95	116521	1708.8	0.0248947	0.684062	59.5756
1660	119282	1694.99	116659	1709.19	0.0260053	0.686038	59.3627
1662	119394	1695.22	116808	1707.81	0.0250363	0.688862	59.2271
1664	119510	1690.81	116947	1700.97	0.0247243	0.69189	59.1829
1666	119627	1688.93	117078	1693.32	0.0251782	0.693757	59.0844
1668	119742	1684.58	117210	1693.24	0.0251788	0.694817	59.0759
1670	119856	1687.69	117339	1694.36	0.025993	0.69506	58.8803
1672	119967	1691.55	117480	1686.52	0.0251186	0.694432	58.8358
1674	120081	1689.06	117617	1690.81	0.0250584	0.695837	58.8862
1676	120196	1684.92	117741	1680.92	0.0258105	0.69793	58.7991
1678	120307	1685.1	117867	1689.92	0.0253673	0.698375	58.7192
1680	120420	1686.22	117997	1692.09	0.0260591	0.696653	58.5592
1682	120530	1680.84	118142	1698.78	0.0263224	0.695442	60.5398
1684	120639	1675.46	118188	1702.36	0.027351	0.69247	63.3058
1686	120745	1675.57	118206	1705.77	0.0281186	0.691703	64.0425
1688	120848	1682.17	118306	1700.13	0.0275383	0.69114	65.5605
1690	120953	1687.9	118367	1695.24	0.0266862	0.689641	65.5506
1692	121062	1693.78	118496	1704.57	0.0263692	0.68796	66.5538
1694	121172	1695.87	118581	1699.57	0.0257632	0.685047	66.5378
1696	121285	1696.28	118717	1702.14	0.027213	0.683474	67.5593
1698	121393	1704.45	118802	1693.19	0.026614	0.683812	67.5818
1700	121503	1710.39	118916	1693.87	0.0262162	0.683278	67.6063
1702	121614	1706.89	119031	1709.88	0.0262127	0.681334	67.6195
1704	121726	1702.77	119160	1699.27	0.0270815	0.678058	68.7614
1706	121835	1696.89	119245	1692.96	0.0276742	0.677408	69.497
1708	121942	1704.99	119334	1697.85	0.0287213	0.675953	68.6431
1710	122045	1707.77	119487	1691.18	0.0271068	0.672762	68.068
1712	122154	1703.76	119639	1688.74	0.0277041	0.670842	67.4985
1714	122262	1703.33	119783	1682.92	0.0282977	0.670546	66.7888
1716	122367	1706.03	119923	1692.07	0.0276333	0.670453	66.5072
1718	122475	1706.53	120047	1690.56	0.0274118	0.668197	66.3976
1720	122585	1712.69	120175	1684.9	0.0274217	0.667126	66.1569
1722	122694	1727.88	120300	1685.03	0.0261727	0.665602	65.9804
1724	122809	1734.8	120424	1686.27	0.0254133	0.665113	65.9759
1726	122927	1740.83	120537	1680.51	0.025968	0.663683	65.8237
1728	123043	1744.45	120656	1674.64	0.0253134	0.661102	65.8409
1730	123163	1733.17	120769	1675.82	0.0259726	0.657876	65.9935
1732	123280	1730.62	120878	1684.65	0.0278054	0.65801	65.6272
1734	123389	1734.5	120997	1689.84	0.0269152	0.657795	65.2474
1736	123502	1741.01	121121	1697.43	0.0265508	0.656715	64.9093
1738	123617	1739.93	121250	1693.48	0.0261941	0.655452	64.778
1740	123733	1739.81	121368	1702.81	0.0268715	0.654223	64.5938
1742	123847	1749.7	121488	1710.84	0.026927	0.652463	64.3227
1744	123961	1750.19	121616	1706.83	0.0263177	0.651066	64.2601
1746	124077	1768.83	121735	1702.45	0.0277319	0.650108	63.8375
1748	124188	1785.56	121862	1695.41	0.0263877	0.649962	63.5217
1750	124305	1802.6	121978	1709.38	0.0261936	0.651354	63.1675
1752	124422	1822.26	122092	1706.62	0.0259089	0.652568	62.8606
1754	124541	1835.24	122207	1701.36	0.0261618	0.652958	62.5216
1756	124658	1847.48	122324	1705.56	0.0261695	0.653311	62.3267
1758	124775	1866.39	122437	1706.78	0.0260331	0.652631	62.5716
1760	124892	1887.59	122539	1706.12	0.0256689	0.650866	62.6927
1762	125012	1917.07	122650	1722.09	0.0245369	0.650433	63.0176
1764	125137	1907.01	122752	1735.53	0.0252938	0.649675	63.3726
1766	125259	1889.49	122858	1734.17	0.0262007	0.648051	63.6655
1768	125377	1904.86	122970	1744.96	0.0266782	0.647039	63.7833
1770	125493	1898.69	123087	1744.15	0.0258721	0.646539	64.0471
1772	125612	1911.1	123197	1728.17	0.026559	0.645456	64.1611
1774	125729	1920.83	123312	1731.58	0.0263077	0.643751	64.1434
1776	125847	1952.3	123429	1736.01	0.025267	0.64365	64.2674
1778	125970	2003.89	123538	1743.5	0.0255581	0.644385	64.354
1780	126091	2033.62	123648	1738.51	0.0254308	0.643845	64.4622
1782	126214	2084.23	123761	1740.24	0.0250703	0.643061	64.7004
1784	126338	2067.96	123869	1752.17	0.0250875	0.641426	65.0359
1786	126462	2000.89	123977	1749.83	0.0264371	0.640104	65.1429
1788	126580	1954.99	124094	1772.01	0.0262419	0.637885	65.3559
1790	126700	1915.46	124206	1788.16	0.0264598	0.636066	65.7641
1792	126818	1881.5	124315	1804.05	0.0279428	0.634862	66.2287
1794	126931	1875.81	124420	1821.96	0.0298974	0.633827	66.2056
1796	127037	1876.21	124543	1835.48	0.0278658	0.632589	66.3765
1798	127150	1866.75	124658	1847.54	0.0282745	0.631667	66.5137
1800	127262	1859.47	124774	1866.24	0.0287162	0.631857	66.566
1802	127372	1855.84	124889	1886.65	0.0289129	0.632172	66.6094
1804	127482	1858.39	125006	1917.57	0.0294925	0.632004	66.6095
1806	127589	1858.82	125131	1907.91	0.0300233	0.63164	66.5362
1808	127695	1860.87	125257	1889.28	0.0301082	0.631049	66.4519
1810	127800	1860.58	125381	1905.36	0.0300619	0.630472	66.4388
1812	127905	1850.82	125499	1898.29	0.0304119	0.630833	66.4135
1814	128010	1838.22	125618	1911.78	0.030212	0.631549	66.4938
1816	128114	1830.33	125729	1920.86	0.0308037	0.632921	66.435
1818	128217	1811.51	125844	1952.25	0.0298174	0.633734	66.5736
1820	128323	1794.8	125958	1954.44	0.0304849	0.634298	66.753
1822	128426	1780.73	126071	1987.17	0.0313429	0.634994	69.2704
1824	128527	1767.07	126092	2035.49	0.0310731	0.636062	74.3984
1826	128628	1767.36	126011	2074.95	0.0321559	0.637339	77.9856
1828	128726	1770.7	125988	2080.2	0.0324918	0.63882	77.7889
1830	128822	1776.53	126110	2090.37	0.0319319	0.640576	77.803
1832	128920	1778.23	126224	2083.63	0.0303643	0.642394	77.8101
1834	129022	1780.55	126339	2067.84	0.0298515	0.643726	77.9517
1836	129126	1801.66	126451	2005.22	0.0306477	0.645094	76.1426
1838	129227	1806.62	126633	1934.56	0.0294907	0.646751	73.5691
1840	129332	1798.26	126842	1874.75	0.0285755	0.648728	71.1711
1842	129440	1794.56	127028	1876.96	0.02902	0.650555	68.8961
1844	129546	1795.01	127216	1861.24	0.0309105	0.652284	68.5172
1846	129645	1824.89	127334	1856.69	0.031187	0.654323	68.6417
1848	129743	1819.14	127432	1854.51	0.0258641	0.656274	69.6706
1850	129861	1808.79	127497	1859.54	0.0276148	0.657714	70.7755
1852	129971	1804.65	127560	1857.57	0.0298518	0.658685	71.5464
1854	130073	1809.22	127635	1860.76	0.0295113	0.659413	72.1776
1856	130176	1811.47	127716	1860.91	0.0285458	0.659658	72.8706
1858	130282	1816.52	127796	1861.01	0.0281587	0.659592	73.735
1860	130390	1821.91	127872	1852.06	0.0292791	0.660136	74.145
1862	130493	1822.64	127960	1848.79	0.0273319	0.660283	74.656
1864	130604	1826.72	128047	1830.29	0.0270882	0.659607	74.9746
1866	130716	1827.96	128142	1830.35	0.0264777	0.659171	75.2858
1868	130830	1832.28	128237	1806.51	0.0262321	0.660158	74.0536
1870	130946	1842.04	128380	1786.96	0.0256665	0.661167	72.2869
1872	131064	1844.7	128537	1765.65	0.0248272	0.661696	70.6302
1874	131186	1844.77	128690	1768.53	0.0243054	0.662309	69.3687
1876	131310	1845.1	128825	1776.7	0.0241001	0.662691	68.1197
1878	131435	1842.22	128964	1778.94	0.023984	0.663302	66.9969
1880	131561	1850.39	129103	1782.79	0.0248405	0.662395	65.3815
1882	131682	1895.16	129264	1794.65	0.0225102	0.659395	73.4461
1884	131817	1908.1	129104	1800.56	0.021579	0.65639	72.9838
1886	131958	1931.52	129232	1806.86	0.0221741	0.653102	72.3621
1888	132096	1964.87	129372	1800.37	0.0218764	0.649033	71.5894
1890	132237	2000.17	129522	1787.6	0.0208024	0.645128	70.8772
1892	132386	2028.31	129659	1828.95	0.0201546	0.64123	70.2544
1894	132541	2041.02	129799	1812.63	0.0200467	0.637636	69.7268
1896	132697	2044.3	129946	1803.52	0.0204892	0.634132	69.1026
1898	132851	2062.51	130082	1809.64	0.020287	0.630551	68.5057
1900	133008	2079.96	130218	1812.31	0.0202425	0.627331	67.8207
1902	133165	2105.76	130360	1821.7	0.0196089	0.624266	67.1063
1904	133329	2127.65	130499	1822.68	0.0187716	0.621411	66.4691
1906	133500	2138.6	130643	1828.22	0.0183445	0.618981	65.9543
1908	133676	2145.79	130783	1827.73	0.0185589	0.616477	65.4057
1910	133851	2161.54	130927	1841.63	0.018393	0.614315	65.0531
1912	134028	2188.04	131066	1844.75	0.0192511	0.612577	64.3508
1914	134198	2205.04	131222	1844.78	0.017915	0.611065	63.7859
1916	134380	2236.59	131374	1845.33	0.0174142	0.609852	63.1791
1918	134569	2268.34	131527	1837.52	0.0165587	0.608866	62.6163
1920	134767	2309.88	131675	1894.43	0.0158661	0.608156	62.1005
1922	134974	2330.64	131834	1909.68	0.0152842	0.60785	61.7291
1924	135190	2386.07	131991	1937.3	0.0156562	0.607942	61.0406
1926	135400	2459.86	132159	1981.32	0.0145201	0.608249	60.523
1928	135626	2514.23	132326	2021.5	0.0143306	0.608688	60.0472
1930	135855	2548.87	132498	2040.91	0.0140185	0.609081	59.6279
1932	136090	2480.55	132673	2041.34	0.0139132	0.609618	59.3988
1934	136325	2483.14	132835	2060.7	0.0146409	0.610305	58.7948
1936	136549	2477.89	133017	2080.98	0.0142877	0.610933	58.223
1938	136778	2486.07	133200	2111.62	0.0143802	0.611364	57.5489
1940	137006	2549.87	133399	2136.39	0.0139451	0.611786	57.0326
1942	137240	2538.46	133598	2140.73	0.0143353	0.612258	56.456
1944	137468	2554.37	133802	2153.88	0.0144316	0.612615	55.8097
1946	137694	2571.83	134011	2186.36	0.0141448	0.612963	55.2696
1948	137925	2590.54	134209	2206.15	0.0144243	0.613432	54.624
1950	138151	2853.19	134427	2244.8	0.0141057	0.614436	54.0536
1952	138382	2803.99	134647	2281.28	0.0142052	0.615662	53.7231
1954	138611	2782.09	134863	2332.67	0.0147788	0.616682	53.9047
1956	138830	2862.99	135056	2329.17	0.0145604	0.61776	53.1363
1958	139052	2944.92	135313	2438.6	0.0134811	0.618763	52.4982
1960	139292	2921.25	135571	2501.93	0.0131552	0.620449	52.034
1962	139537	2883.55	135823	2558.38	0.0137712	0.621573	51.4758
1964	139771	2858.59	136090	2480.41	0.0138204	0.622627	50.9672
1966	140003	2831.99	136355	2483.48	0.0141462	0.622875	51.0214
1968	140230	2794.08	136574	2477.17	0.0142318	0.624315	51.2736
1970	140455	2754.18	136777	2485.68	0.0143265	0.62547	51.4453
1972	140678	2721.64	136986	2551.33	0.0139439	0.626464	51.7437
1974	140907	2708.29	137192	2536.4	0.0143167	0.626182	51.9392
1976	141131	2687.06	137409	2545.59	0.0140364	0.626683	52.2392
1978	141358	2664.54	137611	2575.41	0.0143551	0.627472	52.4948
1980	141580	2663.19	137817	2566.57	0.0143982	0.628477	53.3176
1982	141801	2669.98	137981	2602.83	0.0144911	0.628207	55.8334
1984	142021	2697.67	138030	2653.95	0.014672	0.628606	58.2733
1986	142238	2724.98	138080	2712.8	0.0143798	0.628312	60.8567
1988	142459	2746.38	138124	2822.98	0.0145134	0.628802	63.4067
1990	142678	2747.2	138166	2870.07	0.0141574	0.628507	65.4438
1992	142903	2718	138251	2845.01	0.0142733	0.627683	65.5363
1994	143126	2690.13	138481	2772.95	0.0142518	0.627028	65.6531
1996	143350	2696.04	138702	2788.53	0.0142944	0.626247	65.7081
1998	143573	2752.94	138925	2918.01	0.0140201	0.625938	65.7227
2000	143801	2778.08	139156	2966.68	0.013488	0.625378	65.9015
2002	144038	2793.9	139388	2889.17	0.0136233	0.624644	66.1225
2004	144273	2776.84	139619	2880.47	0.0139393	0.624046	66.1867
2006	144503	2828.51	139852	2846.96	0.013573	0.623501	66.2675
2008	144740	2845.59	140081	2824.34	0.0132513	0.622937	65.744
2010	144982	2804.17	140348	2770.26	0.0129778	0.622008	64.4474
2012	145230	2767.59	140669	2722.21	0.0134769	0.621418	62.9884
2014	145468	2742.64	141003	2702.72	0.013531	0.620839	61.9976
2016	145706	2758.64	141302	2665.97	0.0135415	0.620263	62.4301
2018	145945	2794.37	141500	2660.9	0.0131582	0.619156	62.6243
2020	146190	2806.91	141715	2667.06	0.0128686	0.617847	62.9636
2022	146442	2820.71	141922	2674.09	0.0131489	0.616763	63.1674
2024	146688	2878.14	142134	2724.53	0.0127876	0.615759	63.349
2026	146942	2901.88	142347	2725.45	0.012367	0.614716	63.6507
2028	147205	2881.38	142555	2764.32	0.0125048	0.613977	63.9512
2030	147466	2841.23	142761	2735.73	0.0127406	0.613086	64.2363
2032	147722	2809.05	142972	2709.39	0.0129784	0.612121	64.5091
2034	147974	2819.14	143183	2682.97	0.0131483	0.611227	64.698
2036	148222	2826.45	143401	2700.03	0.0128636	0.61037	64.9873
2038	148477	2868.2	143611	2764.59	0.0129128	0.609618	65.27
2040	148731	2936.99	143826	2779.85	0.0128488	0.608945	65.5528
2042	148987	2989.28	144048	2794.53	0.0127234	0.608224	65.892
2044	149245	3035.2	144264	2774.69	0.0127995	0.607594	66.1428
2046	149503	3109.2	144482	2826.28	0.0124958	0.607024	66.2648
2048	149766	3034.95	144713	2850.13	0.0123136	0.606486	66.0009
2050	150034	3018.13	144978	2804.69	0.0132934	0.605989	65.4984
2052	150282	3005	145266	2762.15	0.0132226	0.605604	64.9663
2054	150532	2979.51	145547	2735.09	0.0130456	0.605304	64.5257
2056	150785	2951.31	145819	2775.15	0.0132449	0.604879	64.2129
2058	151035	2933.86	146087	2816.08	0.0133271	0.604533	64.3974
2060	151283	2939.26	146325	2794.94	0.0134665	0.604317	64.5099
2062	151529	2939.26	146567	2848.28	0.0132868	0.604102	64.6783
2064	151778	2931.86	146806	2907.12	0.0133603	0.603954	64.8962
2066	152026	2944.38	147048	2897.79	0.0136719	0.60371	65.0159
2068	152268	2940.39	147303	2871.19	0.0135581	0.603517	65.2938
2070	152513	2994.66	147542	2827.25	0.0141729	0.603495	65.313
2072	152747	2973.76	147795	2801.62	0.0136216	0.603439	65.6607
2074	152990	2991.46	148021	2823.77	0.0145419	0.603362	65.7616
2076	153218	3002.02	148263	2826.99	0.0142981	0.603459	65.8755
2078	153450	3026.79	148509	2874.24	0.0140833	0.603279	65.9517
2080	153685	3030.06	148758	2944.65	0.0136756	0.603227	66.0628
2082	153927	3070.54	149006	2993.05	0.0134263	0.603435	66.1538
2084	154174	3119.84	149256	3037.03	0.0131079	0.60353	66.3625
2086	154427	3111.07	149496	3111.15	0.0133099	0.6036	66.4208
2088	154676	3134.66	149754	3035.71	0.0128961	0.603721	66.0003
2090	154933	3047.55	150053	3016.92	0.0133448	0.603896	65.081
2092	155181	2980.33	150369	3000.46	0.0135807	0.604204	64.1011
2094	155425	2929.64	150693	2958.8	0.0134703	0.60447	63.2238
2096	155670	2870.87	151008	2933.27	0.0138109	0.604618	62.1832
2098	155910	2872.03	151333	2940.33	0.0133945	0.604937	61.2191
2100	156157	2833.45	151649	2938.61	0.0133445	0.605388	61.1521
2102	156404	2781.04	151899	2925.5	0.0136755	0.605679	61.4046
2104	156646	2742.15	152124	2959	0.0134615	0.605963	61.7819
2106	156891	2657.15	152337	2931.53	0.0138292	0.606323	61.8842
2108	157130	2673.92	152569	3014.76	0.0129297	0.606563	62.021
2110	157385	2621.18	152793	2963.1	0.0126684	0.606799	62.2007
2112	157645	2576	153019	2995.67	0.0129412	0.606974	62.4035
2114	157899	2570.9	153232	3002.47	0.0132935	0.60722	62.5281
2116	158147	2606.61	153453	3027.2	0.0133064	0.607382	62.5297
2118	158395	2633.22	153687	3030.1	0.0127601	0.607517	62.7127
2120	158653	2667.25	153915	3067.95	0.0130173	0.607591	62.7274
2122	158905	2700	154160	3120.78	0.0125344	0.60769	62.9705
2124	159168	2704.48	154393	3105.05	0.0130264	0.60776	63.0474
2126	159421	2745.33	154637	3148.48	0.0128026	0.607815	63.1641
2128	159678	2736.85	154883	3062.5	0.0127423	0.607914	63.2328
2130	159936	2727.15	155126	2990.08	0.0130801	0.607957	63.2128
2132	160187	2720.48	155372	2946.2	0.0135167	0.608005	63.1945
2134	160431	2687.83	155619	2868.53	0.0135791	0.608094	63.2557
2136	160673	2616.35	155854	2879.17	0.0138638	0.60822	63.4266
2138	160910	2542.64	156086	2849.54	0.0146457	0.608414	62.9972
2140	161135	2568.72	156364	2786.74	0.0136331	0.608665	62.7341
2142	161376	2548.46	156624	2750.34	0.0139044	0.608975	62.561
2144	161612	2517.93	156879	2656.21	0.01474	0.609333	62.4563
2146	161834	2547.98	157123	2675.31	0.0162048	0.609765	61.9166
2148	162037	2594.46	157416	2614.58	0.0154963	0.610267	61.5972
2150	162248	2680.64	157697	2567.2	0.0158767	0.610799	61.0688
2152	162455	2704.96	157986	2572.48	0.0149982	0.611404	60.8363
2154	162673	2798.98	158247	2627.69	0.0154369	0.612024	60.4007
2156	162884	2836.25	158528	2638.2	0.0145973	0.61271	60.0631
2158	163108	2860.97	158804	2702.57	0.0144727	0.613459	59.3784
2160	163333	2896.8	159112	2694.76	0.014032	0.614253	58.7973
2162	163565	2875.61	159406	2745.82	0.0142444	0.61496	58.0534
2164	163794	2918.18	159716	2735.57	0.0136508	0.615734	57.3406
2166	164032	2946.63	160023	2723.81	0.0132587	0.616477	57.6483
2168	164276	2903.71	160243	2719.35	0.0136945	0.61671	58.1167
2170	164513	2857.45	160450	2684.59	0.0140537	0.616931	58.4073
2172	164744	2798	160669	2617.86	0.0144344	0.617083	58.7109
2174	164968	2718.97	160883	2537.78	0.015118	0.617447	59.1366
2176	165183	2744.88	161077	2572.49	0.0163792	0.617974	59.1948
2178	165380	2739.99	161306	2557.53	0.0150983	0.618213	59.586
2180	165594	2770.47	161513	2530.66	0.0153883	0.618305	59.7909
2182	165805	2734.52	161727	2503.15	0.0143974	0.618837	60.2282
2184	166029	2685.17	161908	2578.61	0.0146097	0.61958	60.6384
2186	166250	2625.63	162082	2600.05	0.0146957	0.620192	60.8573
2188	166469	2614.32	162275	2693.49	0.0141639	0.620953	60.9681
2190	166697	2584.6	162470	2705.95	0.0141102	0.621569	60.9193
2192	166925	2601.74	162687	2805.51	0.0134218	0.622118	60.9413
2194	167164	2588.25	162894	2837.77	0.0132023	0.62256	61.1406
2196	167408	2545.89	163101	2859.67	0.0139082	0.623561	61.162
2198	167638	2531.12	163318	2899.05	0.0138488	0.624876	61.3399
2200	167869	2553.45	163527	2868.77	0.0143687	0.62585	61.4591
2202	168092	2601.36	163741	2906.95	0.0144897	0.625432	61.5202
2204	168313	2583.31	163975	2956.59	0.0140298	0.625838	61.8308
2206	168540	2571.39	164191	2918.64	0.0145831	0.626239	62.0458
2208	168759	2555.98	164412	2879.96	0.0146092	0.626166	62.3353
2210	168978	2542.27	164625	2832.65	0.0150262	0.62572	62.5936
2212	169191	2562.03	164837	2770.75	0.015263	0.625846	62.6861
2214	169400	2582.24	165051	2686.42	0.0146744	0.626102	63.014
2216	169618	2604.57	165237	2768.81	0.0153385	0.625362	63.2018
2218	169826	2651.39	165431	2729.76	0.0152291	0.624896	63.3455
2220	170036	2658.39	165638	2781.37	0.0151879	0.624753	63.5915
2222	170247	2608.43	165835	2725.96	0.0159628	0.62494	63.8998
2224	170448	2582.83	166036	2683.63	0.0168715	0.624961	64.0055
2226	170637	2558.59	166250	2625.63	0.0165224	0.624197	64.1158
2228	170831	2523.56	166467	2614.66	0.0161496	0.623308	64.4298
2230	171030	2461.38	166679	2582.87	0.01682	0.623545	64.7999
2232	171221	2438.28	166879	2601.98	0.0169547	0.623442	65.0361
2234	171410	2386.79	167099	2600.85	0.0182145	0.62368	64.6036
2236	171586	2410.76	167372	2548.23	0.0171297	0.623682	64.1741
2238	171773	2440.81	167636	2530.84	0.0162902	0.623322	63.7758
2240	171970	2459.03	167897	2556.1	0.0157364	0.623631	63.6657
2242	172174	2435.2	168125	2608.95	0.0167153	0.623443	63.3911
2244	172366	2457.68	168367	2575.87	0.0167306	0.623091	63.0079
2246	172558	2505.31	168621	2569.29	0.0160128	0.622612	62.6219
2248	172758	2519.29	168870	2545.31	0.0152208	0.622603	62.6258
2250	172969	2562.03	169085	2539.26	0.0164356	0.622858	62.5808
2252	173165	2577.15	169298	2585.13	0.016071	0.621572	62.7414
2254	173365	2618.94	169509	2579.15	0.0158838	0.621338	62.7211
2256	173568	2636.71	169725	2629.67	0.0147503	0.620797	62.8789
2258	173786	2577.19	169928	2673.14	0.014397	0.619642	63.2949
2260	174010	2562.71	170119	2647.24	0.0151687	0.619993	63.5439
2262	174223	2544.24	170308	2590.18	0.0150878	0.62038	63.8012
2264	174436	2547.98	170487	2580.74	0.015098	0.619977	64.1259
2266	174650	2562.78	170661	2555.1	0.0156981	0.618788	64.2333
2268	174856	2600.86	170856	2518.9	0.015558	0.619192	64.6114
2270	175064	2586.86	171029	2461.46	0.0169282	0.61936	64.6118
2272	175254	2581.59	171219	2438.78	0.016362	0.619444	64.7
2274	175452	2522.32	171402	2385.8	0.0161968	0.61894	64.9394
2276	175651	2441.46	171569	2407.98	0.0168333	0.618353	64.9965
2278	175843	2392.33	171755	2438.3	0.0165229	0.618983	65.1376
2280	176039	2361.9	171939	2464.13	0.0167915	0.619214	65.1847
2282	176231	2379.43	172137	2431.96	0.0165224	0.618939	65.0639
2284	176427	2347.94	172340	2449.72	0.0152851	0.618278	65.4429
2286	176639	2348	172513	2502.89	0.0166321	0.616954	65.1624
2288	176833	2367.94	172738	2515.18	0.0151922	0.616253	64.879
2290	177047	2370.75	172971	2562.39	0.0148053	0.616106	63.9306
2292	177266	2375.56	173226	2581.82	0.0147615	0.61508	62.8617
2294	177487	2401.35	173500	2655.07	0.0145335	0.612595	61.8361
2296	177711	2426.12	173799	2573.54	0.0147642	0.611797	61.1334
2298	177933	2461	174074	2559.44	0.0150779	0.611412	61.7072
2300	178150	2497	174252	2541.29	0.015269	0.609881	62.2192
2302	178364	2531.03	174442	2548.19	0.0145821	0.607897	63.0153
2304	178590	2568.66	174617	2551.4	0.0151237	0.606125	63.6508
2306	178808	2610.64	174796	2613.55	0.0145638	0.604801	64.2552
2308	179035	2586.74	174974	2575.78	0.0136816	0.603574	64.4442
2310	179277	2513.39	175169	2599.89	0.0135174	0.601054	64.4542
2312	179524	2486.6	175379	2555.02	0.0149907	0.600086	64.0949
2314	179746	2464.4	175605	2453.67	0.0153837	0.599077	63.7056
2316	179963	2427.13	175828	2394.79	0.0158765	0.597889	63.5012
2318	180174	2393.25	176042	2361.41	0.0173732	0.59659	62.8261
2320	180367	2445.12	176282	2384.27	0.0159956	0.595024	62.4953
2322	180577	2435.81	176513	2326.35	0.0160706	0.594173	62.2314
2324	180786	2425.98	176738	2365.2	0.0164195	0.592488	62.0149
2326	180992	2427.16	176968	2371.8	0.0170471	0.591597	61.7095
2328	181190	2434.58	177211	2368.6	0.0172254	0.590187	61.6913
2330	181387	2541.97	177441	2397.48	0.0154724	0.588792	62.556
2332	181606	2501.09	177618	2412.61	0.0165657	0.585877	62.8647
2334	181812	2546.76	177841	2444.82	0.015555	0.583818	63.2216
2336	182033	2571.22	178051	2481.8	0.0150588	0.580973	63.1587
2338	182261	2590.3	178290	2518.61	0.0140254	0.577796	62.1769
2340	182508	2556.69	178598	2570.01	0.0144437	0.575729	61.0021
2342	182749	2546.79	178908	2629.94	0.0143105	0.573247	59.866
2344	182992	2579.31	179239	2517.58	0.0142084	0.57039	58.6416
2346	183239	2558.6	179585	2479.93	0.0134409	0.567432	57.8508
2348	183501	2530.54	179873	2452.13	0.0139282	0.566241	57.1568
2350	183755	2522.28	180135	2379.1	0.0136071	0.563568	57.6224
2352	184016	2456.17	180321	2447.48	0.0138028	0.561819	58.371
2354	184274	2488.44	180493	2438.61	0.0146586	0.559614	58.6895
2356	184517	2464.56	180698	2431.74	0.0131492	0.557464	59.4915
2358	184790	2417.67	180872	2420.38	0.0137628	0.555713	60.1777
2360	185052	2415.27	181047	2430.3	0.0136766	0.553852	60.8295
2362	185316	2357.62	181220	2435.49	0.0132662	0.551138	61.7477
2364	185589	2298.83	181384	2542.96	0.0135812	0.549344	62.6331
2366	185857	2238.64	181562	2486.29	0.0137174	0.548805	63.419
2368	186123	2186.7	181729	2541.9	0.0135961	0.54742	63.7831
2370	186392	2156.28	181932	2553.74	0.013796	0.54516	63.4061
2372	186658	2143.79	182196	2599.6	0.0140911	0.542286	62.9655
2374	186919	2138.79	182490	2557.43	0.0142666	0.540392	62.3374
2376	187179	2136.48	182787	2545.21	0.0137239	0.53808	61.9912
2378	187450	2112.15	183072	2592.49	0.0146533	0.535643	61.4372
2380	187705	2114.33	183382	2529.62	0.0143712	0.532189	60.7092
2382	187966	2118.37	183716	2532.21	0.0140179	0.528887	59.9832
2384	188236	2112.83	184051	2447.16	0.0140531	0.525871	59.3318
2386	188506	2098.55	184371	2506.52	0.0145936	0.522542	58.8365
2388	188769	2096.66	184689	2415.47	0.0155374	0.519554	58.2363
2390	189016	2118.34	185018	2422.61	0.014895	0.516576	57.9616
2392	189276	2116.81	185324	2355.87	0.0158708	0.513521	57.5376
2394	189522	2114.23	185650	2285.78	0.0157882	0.510469	57.2735
2396	189770	2062.68	185959	2215.57	0.0166011	0.507521	57.1367
2398	190007	2006.34	186258	2163.03	0.0180706	0.504607	56.8834
2400	190227	1975.2	186564	2147.6	0.0183841	0.501645	57.0857
2402	190444	1968.55	186836	2136.51	0.0199623	0.498958	57.1213
2404	190644	1975.94	187114	2144.11	0.017933	0.496375	57.3222
2406	190869	1973.9	187388	2111.91	0.0171353	0.493967	57.638
2408	191105	1962.19	187645	2112.91	0.0171007	0.491555	58.018
2410	191343	1948.7	187898	2118.93	0.0174461	0.489013	58.4153
2412	191578	1965.63	188160	2116.76	0.0178785	0.486495	58.6038
2414	191808	1988.14	188437	2102.45	0.0167581	0.483962	58.9127
2416	192054	1989.15	188702	2087.54	0.0163034	0.481374	59.3923
2418	192309	1971.85	188943	2120.4	0.0168441	0.478958	59.618
2420	192557	1970.06	189204	2113.04	0.0158987	0.476499	59.9258
2422	192821	1956.4	189454	2126.09	0.0155161	0.47396	60.4781
2424	193093	1944.6	189688	2085.35	0.0165192	0.471481	60.863
2426	193350	1929.78	189925	2020.1	0.0165727	0.469193	61.429
2428	193607	1915.92	190137	1984.82	0.0177026	0.466864	61.8669
2430	193849	1913.12	190348	1962.28	0.0180832	0.464548	62.2421
2432	194087	1906.55	190553	1975.68	0.0184474	0.462288	61.5573
2434	194322	1940.28	190818	1976.44	0.0174686	0.460156	60.878
2436	194570	1955.22	191104	1962.28	0.0179066	0.457584	60.0434
2438	194814	2001.19	191405	1945.21	0.0173875	0.455216	59.1219
2440	195067	1997.03	191703	1980.38	0.0163311	0.453394	59.0611
2442	195337	1995.11	191958	1999.28	0.0165443	0.451672	59.436
2444	195605	1991.69	192201	1973.63	0.0166996	0.449721	59.7993
2446	195871	1966.72	192446	1969.58	0.0168376	0.447905	60.2977
2448	196136	1943.91	192688	1970.62	0.0178253	0.446193	60.7529
2450	196388	1950.96	192942	1943.42	0.018586	0.444616	60.9818
2452	196630	1955.87	193207	1945.49	0.0176372	0.443227	61.6386
2454	196886	1941.94	193437	1920.17	0.0180304	0.441969	62.3324
2456	197137	1930.84	193661	1914.55	0.0184604	0.440676	63.0339
2458	197382	1925.48	193875	1912.91	0.018948	0.439316	63.7783
2460	197623	1913.64	194085	1906.18	0.0197078	0.438217	64.5276
2462	197854	1908.5	194289	1940.08	0.0198648	0.437171	65.8698
2464	198085	1898.51	194471	1941.2	0.0207496	0.436172	67.2003
2466	198306	1912.44	194654	1967.12	0.0211797	0.435367	68.3051
2468	198523	1910.98	194848	2008.24	0.0201961	0.434614	68.7566
2470	198750	1906.68	195083	1996.22	0.020389	0.433893	68.524
2472	198976	1890.75	195373	1994.95	0.0206124	0.433131	68.4043
2474	199200	1882.2	195654	1990.99	0.0215835	0.432052	68.1461
2476	199415	1882.24	195945	1958.44	0.0218857	0.430558	67.8324
2478	199627	1876.17	196236	1936.32	0.0220801	0.429192	67.6287
2480	199838	1878.34	196506	1962.34	0.0229098	0.428267	67.2342
2482	200042	1880.84	196784	1947.83	0.0221421	0.427292	66.9128
2484	200253	1884.88	197062	1931.7	0.0218761	0.426242	66.787
2486	200468	1864.77	197325	1928.67	0.0229818	0.425313	66.6487
2488	200673	1872.28	197581	1914.48	0.024023	0.424481	66.3554
2490	200869	1883.44	197835	1909.37	0.0234036	0.423579	66.1756
2492	201070	1885.4	198081	1898.29	0.0231931	0.422635	66.0252
2494	201274	1880.01	198316	1913.1	0.0232047	0.421617	65.9353
2496	201479	1878.62	198545	1910.75	0.0236616	0.420634	65.6333
2498	201680	1887.42	198795	1905.8	0.0225352	0.419759	64.4877
2500	201891	1891.63	199081	1882.11	0.0227594	0.419134	62.1116
2502	202101	1871.76	199411	1882.34	0.0228723	0.418712	60.4532
2504	202310	1869.98	199700	1874.1	0.0232931	0.418274	60.0285
2506	202515	1874.66	199929	1881.12	0.0234253	0.417769	59.502
2508	202719	1884.55	200163	1893.39	0.0227021	0.416971	64.9522
2510	202931	1896.97	200139	1880.59	0.0220752	0.416189	61.9678
2512	203148	1902.59	200489	1862.76	0.0216404	0.415563	59.1218
2514	203371	1918.34	200813	1879.58	0.0221634	0.414796	62.312
2516	203588	1903.16	200884	1884.51	0.0213648	0.413862	65.7622
2518	203815	1907.71	200948	1887.12	0.022191	0.413093	65.4143
2520	204033	1912.48	201170	1884	0.0217651	0.411951	64.9567
2522	204256	1915.36	201401	1875.15	0.0205934	0.41052	64.662
2524	204492	1920.88	201625	1885.15	0.0205162	0.409497	63.7834
2526	204730	1932.34	201879	1895.67	0.0197332	0.408053	67.2669
2528	204979	1953.63	201949	1873.06	0.0192052	0.406505	61.7195
2530	205235	1979.49	202403	1869.18	0.0182242	0.405202	60.7592
2532	205506	1977.41	202656	1881.58	0.0189424	0.403755	61.7264
2534	205767	1988.92	202833	1889.9	0.0187345	0.401551	62.7926
2536	206033	1992.4	203016	1903.17	0.0192086	0.399755	63.7464
2538	206294	2003.74	203206	1902.33	0.0192167	0.397791	64.6635
2540	206555	2015.51	203401	1921.27	0.0189765	0.395891	65.6012
2542	206821	2025.53	203592	1902.84	0.0188533	0.394039	59.5485
2544	207091	2024.1	204092	1913.79	0.0195158	0.391979	58.3446
2546	207352	2031.66	204389	1916.64	0.019568	0.390605	57.1953
2548	207614	2033.49	204690	1929.01	0.0200124	0.388584	57.0963
2550	207871	2040.03	204956	1950.87	0.0202477	0.387209	57.4789
2552	208126	2045.76	205202	1980.18	0.0201893	0.385437	58.0181
2554	208383	2040.28	205457	1974.82	0.0213194	0.383686	58.3156
2556	208628	2054.58	205718	1988.62	0.020622	0.381755	58.6211
2558	208882	2064.65	205983	1990.22	0.0201971	0.379452	58.9974
2560	209143	2063.81	206243	2001.52	0.0206789	0.377015	59.4688
2562	209399	2056.2	206500	2012.83	0.0220223	0.374391	59.7163
2564	209642	2062.86	206774	2026.18	0.0216263	0.371968	60.0685
2566	209890	2064.02	207044	2022.5	0.0220518	0.369451	60.5443
2568	210136	2081.05	207304	2031.47	0.0227748	0.36708	60.8382
2570	210375	2077.07	207570	2032.48	0.02189	0.364527	61.2724
2572	210626	2074.16	207828	2038.5	0.0220875	0.362188	61.7053
2574	210876	2073.87	208082	2047.5	0.0222902	0.359834	62.1267
2576	211125	2068.66	208337	2037.49	0.0223803	0.357439	62.6583
2578	211375	2064	208579	2052.27	0.0232946	0.355174	63.024
2580	211617	2063.71	208833	2064.37	0.0229242	0.352966	63.3826
2582	211864	2063.51	209094	2065.84	0.0234865	0.350866	63.6281
2584	212107	2056.6	209357	2054.82	0.0234881	0.348733	63.9495
2586	212351	2054.51	209605	2063.03	0.0240438	0.34664	64.1317
2588	212591	2049.98	209862	2061.85	0.0235068	0.344597	64.2473
2590	212838	2045.4	210119	2081.34	0.0237419	0.342569	63.8123
2592	213084	2044.06	210393	2076.78	0.0237651	0.340528	63.4585
2594	213331	2042.29	210675	2073.61	0.0243554	0.338546	63.0343
2596	213573	2037.85	210958	2073.98	0.0244041	0.336629	62.5917
2598	213817	2037.83	211241	2064.97	0.0243215	0.334689	62.1738
2600	214062	2036.48	211519	2062.95	0.0244212	0.332894	61.4928
2602	214308	2035.73	211806	2065.17	0.0247088	0.331515	59.877
2604	214553	2032.07	212125	2056.08	0.0243411	0.330143	58.4023
2606	214802	2024.98	212437	2053.9	0.0251882	0.328841	56.8465
2608	215043	2023.96	212752	2045.86	0.0253376	0.327525	55.1608
2610	215284	2031.13	213075	2044.13	0.0242522	0.326194	56.2748
2612	215537	2041.48	213287	2042.37	0.0233844	0.324815	58.369
2614	215800	2035.18	213457	2042.06	0.0229613	0.32346	60.5455
2616	216069	2021.09	213624	2036.01	0.0232099	0.321974	62.9209
2618	216337	2012.73	213785	2037.88	0.0249949	0.320484	64.7906
2620	216587	2010.35	213969	2037.6	0.0252192	0.318898	65.7086
2622	216835	2010.1	214191	2034.95	0.0254762	0.317279	66.5653
2624	217083	2024.48	214416	2036.43	0.0252237	0.315659	67.4237
2626	217334	2040.34	214642	2029.23	0.0249557	0.314036	68.0627
2628	217589	2042.27	214877	2022.97	0.0230898	0.312519	67.1177
2630	217866	2051.77	215166	2024.69	0.0234447	0.311074	65.4253
2632	218141	2036.6	215492	2042.55	0.0229651	0.30975	63.5952
2634	218422	2056.4	215841	2034.2	0.0214754	0.308467	61.9396
2636	218724	2084.94	216189	2014.23	0.0211734	0.307255	60.3534
2638	219031	2079.87	216519	2010.89	0.0213805	0.305956	59.5234
2640	219337	2151.69	216809	2008.58	0.0207887	0.304689	59.0894
2642	219653	2228.42	217082	2024.45	0.0209946	0.303133	58.5686
2644	219967	2244.06	217365	2042.32	0.0189199	0.301604	59.1354
2646	220317	2276.74	217612	2042.26	0.018921	0.300116	59.5591
2648	220670	2286.3	217884	2052.41	0.017985	0.298493	60.2151
2650	221042	2327.25	218144	2036.37	0.0187461	0.297005	60.6143
2652	221401	2366.55	218421	2056.37	0.0178994	0.295613	60.8996
2654	221779	2383.17	218723	2084.95	0.0172993	0.294314	61.0522
2656	222172	2361.07	219036	2079.79	0.0162005	0.293168	61.4023
2658	222593	2325	219337	2151.65	0.0160969	0.291842	61.4952
2660	223019	2317.64	219661	2230.45	0.0146953	0.29077	61.7014
2662	223487	2314.18	219977	2244.52	0.0154387	0.289442	60.9669
2664	223935	2348.19	220380	2282.64	0.0150538	0.288314	60.2149
2666	224395	2407.34	220789	2287.8	0.0144446	0.287249	59.5692
2668	224877	2500.75	221202	2352.1	0.0143699	0.286133	58.9855
2670	225364	2550.91	221613	2381.91	0.0145229	0.284971	58.7723
2672	225847	2482.33	222025	2385.04	0.0153317	0.283837	59.3812
2674	226307	2393.3	222413	2321.73	0.0165673	0.282554	59.7923
2676	226734	2357.26	222828	2329.28	0.0166156	0.281572	60.3457
2678	227161	2413.38	223255	2303.21	0.0174464	0.279933	60.5994
2680	227571	2479.25	223719	2325.14	0.0164416	0.278859	61.4015
2682	228007	2476.76	224137	2369.81	0.0167986	0.277484	62.132
2684	228436	2457.42	224578	2433.91	0.0159338	0.276053	62.8273
2686	228891	2429.89	225037	2536.44	0.0145777	0.2748	62.9566
2688	229390	2393.62	225533	2558.39	0.014421	0.273577	62.9601
2690	229897	2345.38	226025	2439.18	0.0149866	0.272426	62.93
2692	230387	2303.24	226490	2363.47	0.0159865	0.271512	62.7939
2694	230848	2304.77	226937	2352.09	0.0156192	0.270364	63.3201
2696	231321	2321.57	227342	2462.66	0.0144451	0.269329	64.3217
2698	231835	2295.26	227718	2489.93	0.014711	0.268246	65.2703
2700	232342	2263.85	228113	2471.95	0.0151855	0.267042	65.1003
2702	232835	2249.06	228576	2451.13	0.0160298	0.265859	64.3469
2704	233305	2238.58	229114	2414.84	0.0164287	0.264468	63.6847
2706	233765	2228.61	229683	2371.09	0.0165655	0.263307	63.4498
2708	234224	2214.49	230214	2307.25	0.0169552	0.261929	63.3901
2710	234674	2207.75	230709	2295.8	0.0179242	0.261048	63.2422
2712	235101	2229.99	231201	2327.56	0.018212	0.260058	62.4569
2714	235524	2253.44	231773	2299.12	0.0190442	0.259124	61.3592
2716	235929	2243.69	232367	2262.32	0.0194199	0.258127	60.2748
2718	236328	2277.41	232939	2246.13	0.0198084	0.257003	59.2573
2720	236721	2272.15	233482	2234.92	0.0205356	0.255971	58.1554
2722	237101	2287.72	234020	2222.92	0.0204271	0.254816	57.2499
2724	237485	2274.45	234541	2201.29	0.0215293	0.253545	56.3472
2726	237852	2270.23	235040	2225.61	0.0226357	0.252203	59.9532
2728	238202	2300.42	235287	2269.41	0.0221212	0.250686	68.3218
2730	238563	2352.16	235286	2243.19	0.0230335	0.249659	66.3809
2732	238911	2471.59	235813	2233.91	0.0225459	0.248795	64.5835
2734	239267	2624.89	236314	2276.17	0.0222094	0.247958	70.1823
2736	239630	2790.49	236445	2288.14	0.0234447	0.247295	72.7491
2738	239975	2862.09	236723	2272.05	0.0228668	0.246694	73.3539
2740	240330	2770.91	237083	2288.37	0.0231652	0.24595	74.0577
2742	240681	2705.85	237444	2275.55	0.02423	0.245221	74.5501
2744	241017	2640.37	237800	2265.97	0.0247481	0.244556	74.9231
2746	241348	2531.43	238146	2294.51	0.024859	0.244066	75.3416
2748	241678	2418.34	238493	2330.82	0.0262917	0.243365	76.0212
2750	241990	2322.01	238824	2431.59	0.0271678	0.242675	76.7386
2752	242293	2233.22	239156	2584.35	0.0275711	0.241949	78.6683
2754	242593	2168.41	239443	2688.98	0.0295788	0.241244	81.028
2756	242874	2136.09	239708	2832.69	0.0302159	0.240632	82.5344
2758	243149	2112.95	240000	2864.82	0.0299138	0.239898	83.0452
2760	243427	2095.57	240343	2767.03	0.0293369	0.238739	81.3959
2762	243713	2084.75	240776	2688.53	0.0288854	0.237698	81.1844
2764	244004	2085.41	241134	2617.18	0.0283431	0.236876	81.4898
2766	244302	2101.49	241463	2485.48	0.0277523	0.236165	80.7669
2768	244607	2121.18	241822	2373.12	0.0270816	0.235601	80.2498
2770	244921	2128.34	242156	2271.55	0.0251966	0.235296	80.1302
2772	245258	2136.74	242465	2185.35	0.0232688	0.235202	80.0784
2774	245623	2158.05	242757	2146.79	0.0226277	0.234911	79.3288
2776	246000	2182.32	243061	2118.92	0.0210311	0.234597	78.647
2778	246405	2287.62	243365	2098.18	0.0203254	0.234268	77.5857
2780	246825	2402.61	243688	2084.71	0.0190614	0.233242	77.3059
2782	247275	2454.76	244000	2085.17	0.017508	0.232272	76.3314
2784	247767	2447.72	244343	2103.72	0.0165947	0.23231	76.0247
2786	248286	2452.01	244660	2124.69	0.0171038	0.232749	75.8324
2788	248788	2448.35	244980	2129.17	0.0173484	0.233736	76.45
2790	249281	2437.48	245282	2137.39	0.0184816	0.234545	75.9524
2792	249743	2484.74	245658	2160.16	0.0179841	0.235365	74.9775
2794	250215	2530.86	246071	2186.96	0.0167825	0.235972	73.694
2796	250720	2588.26	246533	2326.27	0.0157861	0.236562	73.1774
2798	251256	2654.52	246980	2443.15	0.0155713	0.236909	72.0407
2800	251798	2631.7	247504	2463.79	0.0158488	0.236965	71.4628
2802	252330	2577.57	248043	2430.8	0.0161164	0.23722	71.5404
2804	252854	2534.26	248544	2474.63	0.0154486	0.237416	72.5624
2806	253399	2506.18	248979	2427.81	0.0158124	0.237634	72.6192
2808	253931	2445.62	249453	2442.95	0.0156881	0.237896	72.8244
2810	254467	2416.24	249902	2507.75	0.0158973	0.238889	72.1748
2812	254994	2465.26	250407	2545	0.0156274	0.239772	70.5788
2814	255527	2537.53	251009	2628.05	0.0154294	0.24055	71.3491
2816	256066	2538.8	251483	2678.83	0.0151157	0.24077	72.3628
2818	256616	2470.83	251952	2608.72	0.0157167	0.240951	71.3382
2820	257144	2427.07	252543	2560.12	0.0165171	0.241095	71.1018
2822	257646	2431.5	253087	2514.81	0.0169978	0.241074	71.2123
2824	258134	2432.19	253620	2500.04	0.0170025	0.241176	71.158
2826	258622	2385.26	254156	2406.27	0.0186815	0.240891	70.6197
2828	259066	2294.86	254727	2424.59	0.0177207	0.240967	70.7276
2830	259535	2306.44	255249	2504.26	0.0173483	0.240686	70.8769
2832	260014	2371.51	255781	2567.83	0.0175545	0.240222	70.5885
2834	260488	2405.47	256353	2509.63	0.0171379	0.239396	70.4476
2836	260975	2430.13	256916	2426.58	0.0178642	0.238144	69.9099
2838	261446	2584.18	257483	2427.8	0.0166901	0.236762	69.1129
2840	261952	2713.49	258046	2440.57	0.0169246	0.234799	68.2755
2842	262455	2697.99	258614	2386.8	0.0168064	0.232713	68.6319
2844	262966	2690.92	259073	2293.51	0.0183189	0.231513	69.7132
2846	263438	2757.23	259502	2302	0.0177723	0.23104	69.2534
2848	263925	2846.42	260014	2371.51	0.0165486	0.230577	68.1758
2850	264449	2925.4	260556	2410.36	0.0161408	0.230357	68.9223
2852	264987	2938.17	261004	2431.5	0.0153606	0.230275	70.5476
2854	265552	2979.77	261388	2567.87	0.014885	0.230054	72.5218
2856	266137	3025.24	261779	2678.42	0.0140986	0.229486	75.1024
2858	266755	3056.51	262144	2752.5	0.0136132	0.22725	75.4787
2860	267401	3095.79	262672	2659.97	0.0137691	0.225181	74.7693
2862	268046	3148.97	263241	2719.72	0.0131994	0.22331	74.2894
2864	268725	3168.74	263781	2822.54	0.0130436	0.221344	73.2744
2866	269418	3201.23	264392	2924.04	0.0129473	0.219255	70.4477
2868	270122	3220.28	265144	2941.88	0.0127565	0.21765	67.5192
2870	270842	3059.2	265933	3015.08	0.012536	0.215872	65.3315
2872	271581	3071.24	266723	3054.57	0.0127842	0.214512	63.4991
2874	272311	3118.5	267523	3103.22	0.0128899	0.213207	63.6729
2876	273038	2973.64	268190	3161.57	0.0129675	0.211836	64.5712
2878	273767	2968.32	268836	3170.23	0.0130121	0.21094	65.6049
2880	274495	2976.01	269474	3204.26	0.0131556	0.209823	66.6033
2882	275220	2814.29	270131	3220.5	0.013161	0.209002	66.9794
2884	275947	2662.69	270843	3059.1	0.0139169	0.208241	66.987
2886	276637	2678.18	271600	3071.54	0.0135679	0.207977	67.0906
2888	277346	2711.85	272328	3119.63	0.0133911	0.207766	67.9503
2890	278065	2641.22	272996	2974.45	0.0145051	0.207888	68.7308
2892	278728	2571.12	273662	2961.76	0.014278	0.208166	69.476
2894	279401	2495.7	274327	3003.36	0.0143559	0.208324	70.3556
2896	280069	2449.53	274982	2897.04	0.0152668	0.208983	70.7815
2898	280696	2429.93	275659	2661.58	0.0165286	0.209389	69.4177
2900	281274	2457.46	276452	2664.64	0.0160314	0.210131	68.0566
2902	281868	2474.35	277239	2722.3	0.0160565	0.210986	66.686
2904	282458	2467.23	278039	2643.87	0.0164483	0.21195	65.4653
2906	283032	2438.46	278770	2566.69	0.0173323	0.213075	65.0058
2908	283574	2418.27	279451	2490.09	0.0179415	0.21428	64.7259
2910	284094	2412.83	280110	2446.85	0.0182383	0.215884	64.3916
2912	284602	2389.68	280725	2429.1	0.017968	0.21783	64.4852
2914	285113	2369.13	281261	2457.04	0.0196294	0.219352	64.7264
2916	285577	2360.21	281809	2473.93	0.0195499	0.220474	66.4
2918	286041	2353.44	282270	2477.22	0.0202369	0.221496	67.9854
2920	286487	2351.37	282728	2452.93	0.0203564	0.222468	69.008
2922	286929	2342.41	283207	2430.09	0.0203769	0.223343	68.5295
2924	287368	2340.55	283754	2412.43	0.0212475	0.223956	67.856
2926	287789	2339.62	284298	2413.07	0.0209733	0.224601	67.1976
2928	288213	2339.06	284834	2371.84	0.020968	0.22572	66.5993
2930	288636	2316.71	285337	2366.95	0.0214516	0.226304	66.2039
2932	289048	2304	285813	2353.57	0.0217299	0.227022	65.828
2934	289453	2301.83	286277	2353.3	0.0215565	0.227944	65.6196
2936	289860	2310.38	286718	2349.27	0.0224961	0.228547	65.1355
2938	290249	2318.72	287174	2334.48	0.021454	0.229069	65.3252
2940	290656	2355.39	287586	2347.34	0.0205006	0.229683	67.4603
2942	291081	2345.71	287896	2335.53	0.0196414	0.230243	69.7511
2944	291523	2331.84	288201	2339.8	0.0196331	0.230796	71.3761
2946	291965	2341.33	288536	2320.31	0.0194051	0.230858	70.8603
2948	292411	2365.87	288974	2304.53	0.0182118	0.230009	70.144
2950	292889	2396.43	289426	2301.27	0.0168738	0.229053	69.8862
2952	293406	2448.92	289859	2310.34	0.0178948	0.227812	69.2927
2954	293897	2512.21	290293	2319.66	0.0173266	0.226459	68.7695
2956	294406	2480.39	290747	2364.3	0.0165133	0.224788	68.6856
2958	294945	2382.52	291205	2338.82	0.0174714	0.223212	68.5244
2960	295458	2339.65	291679	2328.43	0.0187703	0.221561	68.1032
2962	295939	2326.02	292168	2350.5	0.0181973	0.219937	67.7148
2964	296439	2401.35	292675	2382.58	0.0176732	0.218429	67.0811
2966	296957	2411.18	293237	2419.07	0.0158083	0.21664	66.7325
2968	297541	2405.19	293785	2515.84	0.0153641	0.215008	66.8141
2970	298146	2349.2	294313	2498.72	0.0161693	0.213292	66.9346
2972	298726	2317.03	294871	2389.07	0.0167729	0.211403	66.9926
2974	299290	2308.28	295416	2341.09	0.0170417	0.209624	67.1017
2976	299850	2285.27	295923	2323.61	0.0174995	0.207761	67.4747
2978	300400	2267.19	296434	2401.26	0.0183906	0.20597	67.9661
2980	300928	2290.47	296957	2411.19	0.0175021	0.204181	68.4377
2982	301488	2247.42	297549	2405.11	0.016457	0.202623	69.3182
2984	302088	2218.12	298132	2349.98	0.0172628	0.201154	70.0034
2986	302663	2191.94	298702	2317.35	0.0173898	0.199803	71.2162
2988	303239	2162.19	299225	2310.35	0.0175078	0.198543	72.8392
2990	303814	2131.91	299721	2294.47	0.0187469	0.196849	74.0061
2992	304356	2111.77	300244	2257.22	0.0185935	0.195298	73.1211
2994	304907	2080.05	300854	2296.17	0.0196431	0.193802	71.5683
2996	305433	2047.95	301527	2244.42	0.0212044	0.19243	69.5573
2998	305923	2046.38	302265	2209.81	0.0200145	0.191207	67.4663
3000	306445	2065.19	302980	2177.75	0.0183183	0.190065	65.9578
3002	307020	2081.64	303660	2136.89	0.0175349	0.18841	65.8978
3004	307625	2054.98	304244	2118.03	0.0181817	0.187399	65.7959
3006	308212	2047.64	304816	2086.2	0.0188791	0.185828	65.6901
3008	308782	2043.56	305378	2048.2	0.0193965	0.184165	65.4904
3010	309342	2059.09	305908	2045.84	0.0193614	0.182633	65.9194
3012	309908	2072.43	306435	2064.88	0.0192215	0.180785	66.6125
3014	310483	2073.12	307008	2082.19	0.019302	0.178772	67.3766
3016	311063	2061.82	307611	2055.15	0.019722	0.177579	68.031
3018	311634	2048.02	308188	2047.9	0.0205921	0.176906	68.904
3020	312183	2050.14	308728	2042.08	0.0208012	0.177025	69.9141
3022	312726	2031.73	309237	2056.07	0.0217394	0.176702	70.8064
3024	313247	2032.42	309763	2071.14	0.0219747	0.176766	71.3304
3026	313762	2034.65	310308	2076	0.0221847	0.176406	70.6618
3028	314273	2032.91	310928	2065.82	0.0221786	0.175973	69.9396
3030	314785	2028.3	311546	2047.48	0.0224048	0.175372	69.0787
3032	315294	2031.19	312151	2051.2	0.0218849	0.174801	68.4025
3034	315817	2013.78	312737	2031.35	0.0227384	0.174338	69.3864
3036	316321	1992.36	313222	2032.29	0.0243829	0.173858	70.4586
3038	316793	2020.19	313697	2034.71	0.0229504	0.173423	71.585
3040	317296	2057.82	314167	2034.28	0.0217399	0.173053	71.3146
3042	317827	2108.63	314698	2027.41	0.0203762	0.172775	70.6812
3044	318395	2164.92	315240	2032.96	0.0194156	0.172571	70.0598
3046	318992	2274.84	315793	2014.8	0.0182471	0.172436	69.6708
3048	319628	2268.14	316318	1992.15	0.0181203	0.172124	69.743
3050	320269	2269.06	316792	2020.12	0.0187691	0.171786	70.544
3052	320890	2279.26	317266	2054.96	0.0191567	0.170604	71.1518
3054	321501	2300.16	317790	2105.32	0.0197709	0.169514	71.7491
3056	322098	2334.48	318349	2155.52	0.0203184	0.168516	72.2888
3058	322682	2329.38	318938	2275.42	0.0205541	0.167536	71.3534
3060	323263	2347.81	319643	2267.99	0.0212562	0.166754	69.912
3062	323827	2365.38	320375	2269.24	0.0220364	0.16581	68.3716
3064	324375	2384.54	321092	2283.22	0.0228963	0.164847	69.1629
3066	324905	2422.04	321680	2307.57	0.0232827	0.163891	70.6958
3068	325429	2484.62	322219	2342.25	0.023091	0.163073	72.4012
3070	325960	2532.74	322738	2327.82	0.023718	0.16243	74.1454
3072	326479	2563.56	323251	2347.42	0.0245878	0.161745	75.4519
3074	326982	2628.45	323770	2363.52	0.0253036	0.161227	75.3853
3076	327472	2643.22	324333	2381.69	0.0253721	0.160765	75.4036
3078	327963	2633.29	324872	2418.13	0.0260321	0.16041	75.4217
3080	328441	2669.48	325403	2482.23	0.0265786	0.160495	75.5261
3082	328910	2703.08	325928	2530.92	0.027312	0.160419	75.2954
3084	329367	2735.44	326459	2560.9	0.027617	0.16034	74.9739
3086	329818	2756.59	326977	2628.29	0.0278346	0.160159	74.6266
3088	330267	2789.55	327484	2643.58	0.0277262	0.159522	75.0527
3090	330719	2860.6	327969	2633.15	0.0277249	0.158847	75.8193
3092	331173	2978.47	328431	2668.73	0.0282575	0.158392	76.5587
3094	331620	3096.17	328881	2700.88	0.0283863	0.158128	77.2764
3096	332066	3169.25	329317	2733.2	0.0282196	0.158137	78.0929
3098	332514	3214.29	329740	2752.05	0.0283731	0.158356	78.934
3100	332959	3284.31	330155	2775.94	0.0275136	0.158501	79.891
3102	333418	3271.23	330569	2826.25	0.0280008	0.158314	81.0561
3104	333869	3148.31	330984	2921.36	0.0299931	0.158224	82.2413
3106	334290	2998.15	331394	3045.14	0.0311298	0.158142	81.1627
3108	334697	2814.04	331880	3154.71	0.0326482	0.158077	79.0443
3110	335084	2644.58	332403	3195.62	0.0329362	0.15812	76.7983
3112	335468	2484.41	332927	3283.83	0.0331367	0.158246	77.7667
3114	335850	2361.1	333347	3290.1	0.0331388	0.158443	79.7546
3116	336230	2297.88	333725	3188.59	0.0328303	0.158692	81.7421
3118	336614	2271.22	334086	3087.52	0.0327357	0.158989	83.5834
3120	336999	2253.79	334435	2935.1	0.0316684	0.159396	84.7441
3122	337395	2243.17	334792	2769.95	0.030987	0.160171	83.551
3124	337798	2235.86	335203	2593.71	0.0285061	0.160942	82.5435
3126	338234	2229.11	335605	2428.25	0.0269244	0.161724	81.4537
3128	338693	2224.45	336007	2317.92	0.0242548	0.162511	80.8794
3130	339200	2229.6	336395	2283.14	0.0235068	0.163229	80.3338
3132	339722	2337.86	336785	2261.97	0.0228994	0.164001	79.5129
3134	340254	2443.45	337189	2246.52	0.0216329	0.1646	78.179
3136	340816	2465.4	337623	2239.47	0.0201768	0.164827	76.9247
3138	341417	2458.34	338086	2229.93	0.0191878	0.164636	75.7227
3140	342050	2461.83	338586	2227.17	0.0180973	0.164557	74.7718
3142	342722	2510.11	339123	2213.53	0.0172113	0.164508	73.6388
3144	343428	2545.02	339692	2331.96	0.0155634	0.164357	72.6628
3146	344210	2538.61	340270	2446.64	0.0151499	0.163886	71.7986
3148	345016	2519.99	340886	2467.81	0.0153093	0.163122	71.0458
3150	345817	2387.92	341547	2456.02	0.0159062	0.161967	70.3455
3152	346593	2343.19	342254	2464.19	0.0159537	0.161004	70.2383
3154	347372	2364.73	342966	2534.07	0.0160381	0.159937	70.2409
3156	348151	2380.99	343728	2552.11	0.0159561	0.158783	71.1216
3158	348941	2377.61	344495	2530.64	0.0163844	0.157267	73.9311
3160	349717	2394.41	345165	2516.93	0.0162738	0.155609	74.8101
3162	350507	2429.6	345956	2360.33	0.0174997	0.153409	73.802
3164	351252	2451.16	346857	2336.09	0.0172375	0.150694	72.8862
3166	352022	2470.04	347768	2386.79	0.0168998	0.147866	72.1601
3168	352822	2497.53	348676	2373.04	0.0169944	0.144888	71.2168
3170	353634	2535.45	349593	2388.91	0.0170155	0.141752	69.7783
3172	354463	2557.21	350547	2431.4	0.0167699	0.138763	68.5095
3174	355323	2554.78	351442	2456.49	0.0166873	0.135624	67.4868
3176	356207	2593.9	352361	2477.96	0.0164865	0.132509	67.325
3178	357122	2559.39	353260	2516.11	0.0158889	0.129422	67.2354
3180	358095	2501.91	354172	2563.28	0.0156038	0.126364	67.1052
3182	359109	2466.88	355117	2543.59	0.015524	0.123278	66.6556
3184	360154	2456.28	356111	2597.52	0.0151508	0.120131	66.433
3186	361253	2404.62	357131	2559.04	0.0151888	0.117226	66.4996
3188	362376	2361.44	358198	2495.75	0.015529	0.114451	67.1391
3190	363501	2321.16	359274	2461.64	0.0157562	0.111849	67.7511
3192	364636	2286.44	360386	2454.86	0.0161925	0.109145	68.3841
3194	365768	2253.59	361554	2387.16	0.0166736	0.10678	69.9669
3196	366891	2225.23	362674	2352.13	0.0173255	0.104491	69.6587
3198	367996	2215.36	363911	2305.84	0.0175293	0.102349	68.7137
3200	369111	2224.76	365184	2271.8	0.0174263	0.100461	67.9014
3202	370253	2231.2	366430	2232.97	0.0172767	0.0984827	67.3496
3204	371429	2234.75	367647	2212.56	0.0175593	0.0965049	67.4447
3206	372609	2242.65	368827	2222.03	0.0170845	0.094988	70.0986
3208	373841	2219.29	369877	2232.15	0.0182131	0.0936739	70.7229
3210	375014	2218.23	371061	2229.16	0.0188637	0.0922052	70.1073
3212	376164	2280.4	372335	2248.55	0.0190699	0.090813	69.5261
3214	377318	2254.55	373648	2220.29	0.0197631	0.0895165	68.6064
3216	378449	2284.67	374931	2213.66	0.0180182	0.0886887	67.9671
3218	379700	2355.31	376147	2280.76	0.01666	0.0879168	68.1602
3220	381066	2397.88	377323	2254.46	0.0163084	0.0874663	68.7351
3222	382468	2394.91	378442	2284.29	0.0172967	0.0871198	69.0626
3224	383795	2402.21	379690	2354.97	0.0181285	0.0870613	69.6873
3226	385062	2410.93	381020	2398	0.0189844	0.0873722	70.5159
3228	386268	2401.55	382355	2394.38	0.021003	0.0880693	71.0843
3230	387349	2433.73	383622	2400.36	0.0216334	0.0888245	71.1321
3232	388390	2501.78	384861	2413.63	0.0197864	0.0897793	71.4485
3234	389516	2537.92	386018	2398.13	0.0193926	0.091026	71.7876
3236	390649	2541.08	387060	2412.38	0.0206005	0.0925522	71.4119
3238	391698	2545.51	388073	2487.21	0.0224433	0.0941323	70.9854
3240	392645	2598.99	389132	2535.88	0.0240898	0.0958136	70.4685
3242	393511	2697.35	390223	2541.67	0.0222668	0.0974584	71.1519
3244	394433	2811.03	391208	2540.32	0.0200845	0.0988893	72.0243
3246	395440	2928.51	392113	2549.9	0.0190415	0.100148	72.5477
3248	396489	3079.53	392963	2628.39	0.0194863	0.101174	71.1929
3250	397503	3273.14	393879	2743.55	0.0192575	0.102019	69.9438
3252	398521	3495	394868	2864.01	0.0189989	0.102793	69.1401
3254	399545	3743.78	395908	2981.33	0.0188787	0.103658	69.4597
3256	400567	3961.58	396894	3148.16	0.0189079	0.103928	70.0294
3258	401585	4107.11	397871	3348.59	0.0201338	0.103919	70.8588
3260	402541	4301.68	398847	3568.34	0.0228707	0.103784	71.5313
3262	403383	4560.59	399840	3817.76	0.0243402	0.103589	72.15
3264	404177	4812.96	400835	4014.5	0.0250606	0.10328	73.0436
3266	404949	5110.74	401803	4134.02	0.0258227	0.102818	74.3247
3268	405703	5422.25	402692	4335.96	0.0259394	0.102274	75.7555
3270	406457	5788.09	403483	4593.06	0.0269945	0.10168	76.5761
3272	407185	6092.91	404259	4839.16	0.0267508	0.101155	76.2886

## Sheet: EDC
EDC
Depth (m)	Ice age (a B1950)	Ice age std (a)	Gas age (a B1950)	Gas age std (a)	Accu. Rate (m ie)	Thinning	LIDIE (m ie)
0	-55	22.4438	-1	-1	0.0291194	0.994786	-1
1.65	-41.5367	32.03	-1	-1	0.0291198	0.994464	-1
3.3	-20.4721	63.2147	-1	-1	0.0292301	0.994217	-1
4.95	4.30329	81.8158	-1	-1	0.0293298	0.994052	-1
6.6	31.0565	90.5212	-1	-1	0.0290199	0.994088	-1
8.25	57.0545	88.2457	-1	-1	0.0287542	0.994014	-1
9.9	85.0442	84.331	-1	-1	0.0273208	0.99386	-1
11.55	114.507	92.0587	-1	-1	0.0264006	0.993781	-1
13.2	144.999	98.9025	-1	-1	0.0266514	0.993883	-1
14.85	176.333	99.8596	-1	-1	0.026763	0.993821	-1
16.5	207.539	101.99	-1	-1	0.0269911	0.993714	-1
18.15	239.976	105.304	-1	-1	0.0264693	0.993481	-1
19.8	274.201	108.707	-1	-1	0.0260878	0.993181	-1
21.45	310.094	103.277	-1	-1	0.0259131	0.992649	-1
23.1	346.638	113.601	-1	-1	0.0252925	0.992188	-1
24.75	384.893	118.778	-1	-1	0.0254333	0.991917	-1
26.4	423.739	117.343	-1	-1	0.0262991	0.991562	-1
28.05	461.703	116.864	-1	-1	0.026464	0.991336	-1
29.7	500.202	120.22	-1	-1	0.0262077	0.991009	-1
31.35	539.86	120.134	-1	-1	0.0264677	0.990687	-1
33	579.522	118.768	-1	-1	0.0274429	0.99062	-1
34.65	618.146	117.785	-1	-1	0.0284176	0.990552	-1
36.3	655.803	136.907	-1	-1	0.0268785	0.990497	-1
37.95	696.744	130.566	-1	-1	0.0255221	0.990448	-1
39.6	740.26	130.802	-1	-1	0.0255855	0.990491	-1
41.25	784.06	122.544	-1	-1	0.0277548	0.990577	-1
42.9	824.798	131.82	-1	-1	0.0300925	0.990451	-1
44.55	863.046	132.196	-1	-1	0.0283981	0.990272	-1
46.2	903.94	135.385	-1	-1	0.0267333	0.990074	-1
47.85	947.766	139.373	-1	-1	0.0263841	0.989886	-1
49.5	992.564	138.979	-1	-1	0.0272652	0.989706	-1
51.15	1037.03	138.05	-1	-1	0.0280102	0.989392	-1
52.8	1080.33	136.935	-1	-1	0.0273653	0.989179	-1
54.45	1124.67	118.879	-1	-1	0.0280131	0.988779	-1
56.1	1169.43	126.989	-1	-1	0.0291463	0.98849	32.7441
57.75	1212.13	146.707	81.119	94.2602	0.0291931	0.988101	33.9325
59.4	1255.11	145.191	85.8587	97.9961	0.0284524	0.987652	35.1358
61.05	1300.31	148.993	91.3756	101.517	0.0284287	0.98728	36.3713
62.7	1345.56	133.518	95.7687	104.796	0.0292159	0.98682	37.6326
64.35	1390.3	136.058	100.108	108.345	0.0297599	0.986586	38.8548
66	1433.9	149.064	105.071	112.116	0.0271947	0.986147	40.0999
67.65	1482.74	138.282	110.463	116.51	0.0275933	0.985839	41.4078
69.3	1530.9	148.653	113.694	124.753	0.02792	0.985503	42.695
70.95	1578.87	146.646	117.982	128.689	0.0277623	0.985276	44.0167
72.6	1627.5	141.386	121.437	131.857	0.0272473	0.985001	45.3569
74.25	1677.8	146.335	124.986	135.16	0.0275545	0.984764	46.7143
75.9	1727.92	153.514	128.149	139.069	0.027269	0.984486	48.0839
77.55	1778.58	152.972	130.963	143.41	0.0274656	0.98424	49.4912
79.2	1829.26	138.672	132.924	146.83	0.0271114	0.983778	50.8787
80.85	1881.37	157.04	136.333	150.367	0.0284311	0.983346	52.2906
82.5	1930.73	142.349	138.762	154.033	0.028485	0.982836	53.6551
84.15	1980.74	154.327	143.232	162.769	0.0278837	0.982425	55.0572
85.8	2031.85	146.416	146.465	167.323	0.0270281	0.98195	56.483
87.45	2084.97	177.596	149.449	171.633	0.0282005	0.981496	58.0015
89.1	2136.64	171.641	150.21	176.462	0.0279981	0.98105	59.464
90.75	2188.7	149.237	152.654	180.504	0.0269567	0.980594	60.9346
92.4	2243.55	164.198	155.413	184.449	0.0290264	0.980063	62.4129
94.05	2294.52	161.917	158.125	188.513	0.0286223	0.979639	63.8957
95.7	2346.95	164.731	161.005	192.915	0.0249764	0.97908	65.403
97.35	2407.06	169.934	163.435	195.105	0.0261873	0.978654	66.4592
99	2464.03	177.152	178.571	211.179	0.0266249	0.978209	65.4697
100.65	2520.86	184.35	255.471	230.411	0.0282582	0.977701	64.1605
102.3	2574.79	180.928	348.567	235.677	0.0286364	0.977195	65.6179
103.95	2628.03	176.699	353.371	231.87	0.0292777	0.976741	65.0658
105.6	2680.49	166.639	426.347	241.217	0.0284272	0.976387	64.3336
107.25	2734.89	176.961	503.534	243.927	0.0290533	0.975826	64.9194
108.9	2788.15	164.984	538.324	249.592	0.0304546	0.97535	66.4768
110.55	2838.65	166.698	539.944	243.537	0.0313971	0.974796	66.3761
112.2	2888.64	166.026	597.524	253.8	0.0289041	0.974271	65.1374
113.85	2942.97	171.378	690.308	268.169	0.0287913	0.973617	64.703
115.5	2997.2	179.978	763.045	230.722	0.0275589	0.973129	63.9823
117.15	3054.25	192.639	840.702	248.366	0.0286289	0.97243	64.635
118.8	3109.2	193.506	870.908	251.529	0.0295792	0.972031	65.6441
120.45	3162.77	197.649	891.048	267.945	0.0283848	0.971407	64.1099
122.1	3219.34	185.485	1001.09	261.806	0.0266818	0.970818	63.8463
123.75	3279.95	185.283	1066.1	270.506	0.0275135	0.970244	63.5176
125.4	3338.77	176.45	1133.02	273.221	0.0280717	0.969594	64.1395
127.05	3396.81	179.604	1168.94	261.401	0.0272798	0.969089	63.7154
128.7	3456.58	200.237	1236.33	278.044	0.0282316	0.968385	64.4204
130.35	3514.74	201.242	1268.58	283.055	0.0292242	0.967976	65.3492
132	3570.59	197.071	1293.39	278.305	0.0289613	0.9674	64.8619
133.65	3627.34	179.635	1365.6	272.817	0.0299547	0.966975	65.5203
135.3	3682.58	204.01	1399.01	305.684	0.0304054	0.96665	66.0442
136.95	3737.02	188.986	1435.78	298.99	0.030711	0.966185	65.9027
138.6	3790.94	187.694	1499.6	295.295	0.0289336	0.96574	64.5992
140.25	3848.2	190.222	1602.09	299.25	0.0285124	0.965265	63.9936
141.9	3906.34	175.995	1682.3	301.349	0.0287316	0.964995	64.9227
143.55	3964.41	200.114	1708.86	304.772	0.0284676	0.964304	64.7553
145.2	4023.05	197.468	1775.41	311.758	0.0294743	0.963895	64.6456
146.85	4079.72	188.729	1838.93	314.074	0.0294524	0.963474	65.258
148.5	4136.81	201.67	1878.43	301.063	0.0288927	0.962683	64.782
150.15	4194.7	181.164	1953.14	305.727	0.0292586	0.9623	64.2592
151.8	4252.23	202.655	2029.43	313.387	0.0300321	0.961756	66.074
153.45	4308.32	207.914	2026.32	312.077	0.0290032	0.96134	64.8204
155.1	4366.42	203.822	2129.89	316.281	0.0287166	0.960829	65.1447
156.75	4425.14	206.495	2178.07	304.42	0.0288601	0.96062	64.3711
158.4	4483.57	206.391	2264.68	311.295	0.0303741	0.960354	66.0621
160.05	4539.45	202.328	2265.56	336.966	0.0280176	0.959714	63.7239
161.7	4599.7	214.759	2412.28	345.242	0.0288443	0.959395	65.2516
163.35	4658.6	216.695	2419.43	341.047	0.0287629	0.958819	64.4847
165	4717.34	219.556	2510.9	326.323	0.028722	0.958345	64.8371
166.65	4776.56	205.134	2559.21	313.606	0.0278294	0.958124	64.5061
168.3	4837.69	213.195	2628.86	315.833	0.0281016	0.957493	64.7459
169.95	4898.27	201.723	2678.98	329.927	0.0298046	0.957201	65.1269
171.6	4955.4	207.809	2725.33	302.599	0.029128	0.956748	64.4057
173.25	5013.89	232.417	2807.22	307.5	0.028512	0.956348	65.4209
174.9	5073.67	225.971	2829.86	321.618	0.028097	0.956074	63.8584
176.55	5134.35	236.356	2936.85	334.559	0.0296515	0.955613	66.5114
178.2	5192.23	247.376	2905.93	333.007	0.0294898	0.955328	66.2119
179.85	5250.09	214.623	2974.82	334.335	0.0282774	0.954843	65.5463
181.5	5310.46	233	3059.16	322.561	0.0293718	0.954448	64.6631
183.15	5368.96	243.879	3147.28	364.764	0.0293107	0.953846	64.0675
184.8	5427.26	226.388	3227.76	369.802	0.0260259	0.953449	64.6206
186.45	5493.35	236.087	3271.71	364.592	0.0265508	0.9532	65.8391
188.1	5557.76	241.04	3290.14	357.451	0.0287625	0.952795	63.532
189.75	5617.6	237.819	3433.73	345.395	0.0289337	0.952525	63.1337
191.4	5676.74	249.267	3508.7	335.484	0.0284494	0.952255	64.2813
193.05	5737.28	230.046	3528.9	337.796	0.0293935	0.951841	63.7092
194.7	5795.9	223.243	3607.11	332.314	0.0303198	0.95173	64.2736
196.35	5852.38	245.956	3645.63	328.98	0.0302706	0.951314	64.7621
198	5909.33	252.621	3687.07	335.313	0.0285482	0.951047	65.8835
199.65	5969.74	230.272	3707.18	344.949	0.0272478	0.950737	64.5213
201.3	6033.05	270.886	3808.08	349.116	0.0293384	0.950162	65.9677
202.95	6091.88	239.945	3818.92	356.081	0.0284251	0.950045	65.9834
204.6	6152.24	258.026	3877.45	357.16	0.0289605	0.949796	64.9761
206.25	6211.86	280.018	3971.81	358.754	0.0287405	0.949508	65.2853
207.9	6271.95	280.254	4021.55	346.993	0.0278885	0.94937	64.3649
209.55	6333.9	271.768	4110.28	351.102	0.0280418	0.949004	64.1912
211.2	6395.52	271.076	4175.61	347.719	0.02725	0.948589	64.5681
212.85	6458.97	260.028	4222.23	341.078	0.0298368	0.948144	65.307
214.5	6516.94	254.667	4256.51	354.343	0.0272469	0.947904	65.1969
216.15	6580.44	269.315	4317.78	351.996	0.0279451	0.947426	64.5393
217.8	6642.38	243.434	4400.42	349.868	0.0270426	0.94679	64.7084
219.45	6706.43	239.303	4455.4	340.605	0.0287944	0.946884	65.2357
221.1	6766.59	233.301	4495.58	363.976	0.0278094	0.946921	64.0482
222.75	6828.86	231.867	4594.62	358.861	0.0281668	0.946697	64.3977
224.4	6890.37	224.19	4642.58	365.594	0.0307866	0.946203	65.9479
226.05	6946.67	235.423	4650.04	362.22	0.0282175	0.945965	64.7844
227.7	7008.11	211.535	4749.95	370.616	0.0282429	0.945388	64.3892
229.35	7069.53	217.497	4826.02	369.335	0.0275486	0.945084	64.7989
231	7132.9	220.069	4891.28	350.5	0.0272752	0.944882	64.6424
232.65	7196.54	207.913	4938.3	355.299	0.0254833	0.944209	64.4439
234.3	7264.7	210.565	5005.04	363.643	0.0268073	0.943713	63.8765
235.95	7329.52	198.037	5085.98	372.246	0.029765	0.943214	65.5759
237.6	7387.94	211.061	5088.55	351.735	0.0264006	0.942513	65.191
239.25	7453.85	203.243	5163.14	362.298	0.0270552	0.941922	64.7357
240.9	7518.59	196.491	5252.8	353.421	0.0284082	0.942146	64.298
242.55	7579.87	199.184	5313	358.063	0.0302235	0.941993	64.9152
244.2	7637.47	207.03	5351.11	364.698	0.0289021	0.94199	66.0513
245.85	7697.71	205.472	5371.54	393.407	0.0290284	0.941843	64.0291
247.5	7758.06	192.798	5522.42	395.114	0.0289976	0.941377	64.4813
249.15	7818.14	190.507	5556.91	374.093	0.0285267	0.941059	65.5013
250.8	7879.23	196.397	5582.54	367.487	0.0285424	0.940365	63.8503
252.45	7940.7	191.792	5713.71	350.474	0.0291122	0.939604	63.6138
254.1	8001.02	211.546	5782.69	334.18	0.0272372	0.939373	62.1103
255.75	8065.51	201.051	5888.81	349.439	0.0261619	0.938801	65.5571
257.4	8132.69	204.962	5835.44	362.731	0.0275419	0.93805	64.3365
259.05	8196.56	219.632	5934.93	377.08	0.0255879	0.937288	64.2547
260.7	8265.36	196.412	6001.39	386.994	0.0271822	0.937218	65.5576
262.35	8330.12	229.002	6018.02	362.696	0.0273072	0.936971	65.901
264	8394.61	222.054	6067.02	371.789	0.0265171	0.936874	65.4558
265.65	8461.03	209.371	6142.22	362.588	0.0274863	0.936581	64.0377
267.3	8525.12	221.78	6250.96	371.022	0.0283848	0.936292	63.5638
268.95	8587.21	224.387	6329.61	377.36	0.028541	0.936284	64.5645
270.6	8648.95	252.921	6356.28	392.211	0.0292985	0.936171	65.0145
272.25	8709.11	233.924	6402.65	352.698	0.0284148	0.935692	64.3104
273.9	8771.17	241.484	6489.72	386.214	0.0282934	0.935465	64.367
275.55	8833.51	248.981	6549.15	378.261	0.0274822	0.935643	64.0495
277.2	8897.68	238.188	6622.58	363.521	0.0295845	0.935518	63.2415
278.85	8957.3	254.754	6715.05	377.49	0.0294981	0.935344	63.4225
280.5	9017.1	240.101	6769.53	389.171	0.0295907	0.935269	65.0011
282.15	9076.72	246.944	6776.27	380.115	0.0294503	0.935657	63.6211
283.8	9136.6	229.888	6885.61	349.679	0.0288098	0.935537	63.7202
285.45	9197.82	228.049	6939.41	375.472	0.0280902	0.935312	62.6177
287.1	9260.62	229.768	7039.11	388.899	0.0311302	0.935645	64.4274
288.75	9317.27	242.491	7036.72	395.88	0.0294089	0.93522	63.8046
290.4	9377.26	241.072	7122.48	418.724	0.0303305	0.934936	63.0467
292.05	9435.45	238.207	7215.35	406.113	0.0310102	0.935034	65.4696
293.7	9492.35	235.751	7190.12	406.108	0.0323524	0.934939	64.1321
295.35	9546.9	233.209	7307.53	364.371	0.029194	0.93495	63.7281
297	9607.35	236.363	7381.47	402.749	0.0308095	0.935113	63.4315
298.65	9664.62	228.513	7457.16	382.917	0.0310162	0.935122	63.4825
300.3	9721.51	245.736	7519.93	365.05	0.031898	0.935514	61.3347
301.95	9776.8	249.776	7651	372.488	0.0323888	0.935333	62.6335
303.6	9831.27	250.429	7667.29	375.171	0.0333392	0.935352	63.0135
305.25	9884.18	245.793	7714.54	384.559	0.0292203	0.935705	64.2662
306.9	9944.53	249.845	7731.21	377.437	0.0309143	0.935623	62.2046
308.55	10001.6	247.921	7862.57	385.433	0.0305609	0.935678	63.1484
310.2	10059.3	269.845	7890.91	379.189	0.0308862	0.935474	63.1418
311.85	10116.4	272.994	7952.86	392.236	0.0319071	0.935383	65.1097
313.5	10171.7	267.059	7946.1	416.565	0.0318009	0.935247	64.5187
315.15	10227.1	263.174	8028.74	429.86	0.0323526	0.934893	63.896
316.8	10281.7	257.532	8119.02	409.208	0.0313662	0.935148	63.8188
318.45	10338	257.034	8185.72	450.599	0.0303249	0.935084	65.207
320.1	10396.1	257.857	8199.72	408.59	0.0313145	0.935407	62.8417
321.75	10452.5	255.485	8354.26	419.312	0.0298274	0.935263	64.7106
323.4	10511.6	262.461	8350.78	408.475	0.0294798	0.935116	63.4681
325.05	10571.5	262.793	8462.97	392.133	0.0332135	0.935622	62.6402
326.7	10624.6	251.547	8554.94	386.097	0.0344843	0.935331	62.0941
328.35	10675.7	248.064	8636.66	379.77	0.030006	0.935396	62.5873
330	10734.5	242.605	8680.16	386.446	0.0303076	0.935297	61.4706
331.65	10792.7	243.273	8780.87	396.139	0.0310702	0.934605	63.2697
333.3	10849.5	244.768	8781.29	405.517	0.0294723	0.934413	63.0227
334.95	10909.5	228.527	8853.38	372.541	0.0304932	0.933989	62.2388
336.6	10967.4	231.577	8943.55	377.252	0.0306625	0.93358	62.8993
338.25	11025	231.63	8981.89	377.752	0.0303354	0.933149	63.3422
339.9	11083.3	242.843	9027.66	383.114	0.0291413	0.932549	64.1572
341.55	11144	248.521	9061.19	387.377	0.0314626	0.93239	64.1599
343.2	11200.3	238.533	9121.28	394.913	0.0299987	0.931617	63.9792
344.85	11259.3	219.846	9190.24	361.269	0.0285216	0.930465	63.4138
346.5	11321.5	239.922	9274.2	380.803	0.0315691	0.929893	63.1709
348.15	11377.7	228.127	9341.18	389.557	0.0302703	0.929299	64.3784
349.8	11436.4	239.507	9361.74	378.924	0.0307147	0.92884	64.4223
351.45	11494.2	255.633	9420	377.098	0.0311013	0.928603	65.4647
353.1	11551.3	266.973	9444.39	359.199	0.0288657	0.928087	64.8749
354.75	11612.9	229.461	9520.14	370.853	0.0318627	0.927704	66.8733
356.4	11668.7	252.682	9514.22	378.921	0.0318328	0.927286	68.2732
358.05	11724.6	286.172	9526.77	427.554	0.0286401	0.92688	69.2566
359.7	11786.8	291.352	9552.67	438.526	0.0296357	0.926757	70.7357
361.35	11846.9	316.502	9563.21	448.49	0.0303984	0.926137	72.2645
363	11905.5	313.96	9573.39	425.695	0.029362	0.9256	72.4713
364.65	11966.2	338.977	9627.15	416.658	0.0280965	0.925108	71.3596
366.3	12029.7	330.805	9720.98	391.525	0.026137	0.924507	70.1519
367.95	12097.9	346.887	9814.57	427.219	0.0255888	0.924007	69.0635
369.6	12167.7	383.528	9903.74	398.624	0.0257334	0.92359	68.1341
371.25	12237.2	405.743	9993.7	395.928	0.0246139	0.922839	67.7109
372.9	12309.8	396.698	10066.7	384.865	0.0228973	0.92239	67.7871
374.55	12387.9	424.702	10122.2	389.191	0.023707	0.922074	68.2846
376.2	12463.4	409.123	10162.8	394.431	0.0239881	0.921909	68.5864
377.85	12538	433.739	10209.3	397.785	0.0215458	0.921609	67.8947
379.5	12621.1	440.577	10286.1	426.198	0.0221056	0.921297	68.2936
381.15	12702.1	437.102	10330.5	467.006	0.0215974	0.921144	68.3769
382.8	12785.1	458.116	10386.1	490.903	0.0194054	0.92103	67.4468
384.45	12877.4	454.06	10473.2	511.924	0.0202614	0.921001	66.8793
386.1	12965.8	433.183	10551.7	443.662	0.0201185	0.921009	66.0547
387.75	13054.9	431.822	10631.2	467.683	0.0201692	0.920826	61.8531
389.4	13143.7	457.599	10820.1	479.948	0.0203801	0.920737	62.8954
391.05	13231.6	452.315	10844	505.48	0.0202752	0.920708	66.0585
392.7	13320	452.993	10800.6	518.469	0.0200529	0.920758	67.7873
394.35	13409.4	421.311	10802.5	509.325	0.0207127	0.920719	65.6526
396	13495.9	430.484	10930.6	496.992	0.0210944	0.920743	64.9982
397.65	13580.9	455.009	11009.4	511.869	0.0210853	0.920733	64.2999
399.3	13665.8	462.833	11090.6	467.537	0.0192501	0.920945	64.1151
400.95	13758.9	439.195	11156.1	470.571	0.0208802	0.921093	65.6482
402.6	13844.7	469.479	11163.9	468.629	0.0206832	0.921212	66.7023
404.25	13931.3	465.336	11186.7	484.385	0.0192927	0.921245	67.1624
405.9	14024.1	470.673	11229.9	491.68	0.0200711	0.921514	66.301
407.55	14113.3	482.055	11319.7	446.544	0.0213378	0.921825	65.3419
409.2	14197.2	440.087	11406.7	416.041	0.0205669	0.921977	63.9635
410.85	14284.2	456.919	11509	440.382	0.0229645	0.922204	64.3955
412.5	14362.2	433.732	11551.9	416.277	0.0214826	0.922396	66.9022
414.15	14445.4	437.264	11528.5	424.089	0.0220932	0.922586	68.5641
415.8	14526.4	415.03	11532.1	434.891	0.0224339	0.922999	70.0181
417.45	14606.1	442.191	11541.7	447.445	0.0255919	0.922799	71.952
419.1	14675.9	456.733	11537.6	432.542	0.0239479	0.922059	71.2388
420.75	14750.7	436.135	11623.5	471.952	0.0214874	0.921418	69.831
422.4	14834	435.552	11724.9	453.497	0.0213161	0.920575	68.9094
424.05	14918.1	448.239	11820.1	463.631	0.020554	0.919739	67.8774
425.7	15005.4	451.849	11915.4	490.675	0.0192383	0.918684	66.7524
427.35	15098.7	479.153	12019.1	551.723	0.0201958	0.917694	65.9158
429	15187.7	487.854	12121.6	561.626	0.0209463	0.916815	64.9431
430.65	15273.7	472.498	12231.2	642.038	0.0199093	0.915726	63.7907
432.3	15364.2	515.807	12356.4	651.154	0.0208148	0.914952	64.4056
433.95	15450.8	533.642	12409.5	680.444	0.0199215	0.914159	65.0281
435.6	15541.4	515.16	12461.3	702.674	0.0198184	0.913288	65.7578
437.25	15632.6	508.946	12508.4	809.288	0.0182732	0.912508	65.9533
438.9	15731.5	554.299	12581.7	814.172	0.0179632	0.911682	66.0274
440.55	15832.3	571.918	12663	858.691	0.0186599	0.910805	66.285
442.2	15929.4	555.627	12736.2	978.25	0.0181849	0.910134	66.2941
443.85	16029.1	564.283	12825	958.594	0.0182232	0.909257	66.2938
445.5	16128.6	579.584	12918.7	981.191	0.0184485	0.908361	65.9985
447.15	16227.1	614.298	13025.1	963.67	0.0177094	0.907526	64.1927
448.8	16329.8	655.242	13204.6	974.125	0.0174995	0.906697	62.3738
450.45	16433.8	663.297	13384.8	926.515	0.0168509	0.905723	60.8686
452.1	16541.9	717.31	13545.8	960.407	0.0171153	0.905003	61.3908
453.75	16648.4	741.954	13608.7	1088.44	0.0168474	0.904202	61.9857
455.4	16756.7	719.135	13668.8	1133.31	0.0167361	0.903451	62.7182
457.05	16865.8	784.79	13727.2	1077.37	0.01626	0.902588	62.7146
458.7	16978.3	711.35	13818.4	1185.21	0.015443	0.901746	61.902
460.35	17096.7	763.17	13947.1	1166	0.0154345	0.900989	61.3043
462	17215.4	795.455	14070.9	1120.27	0.0146727	0.900203	60.6417
463.65	17340.3	788.052	14190.1	1207.48	0.0143535	0.89945	61.2433
465.3	17468.1	748.649	14250.7	1277.86	0.01505	0.898663	63.1353
466.95	17590.1	808.02	14250.6	1194.52	0.0144447	0.89793	64.1998
468.6	17717.3	790.561	14289.1	1293.5	0.0141166	0.897114	63.783
470.25	17847.6	888.679	14388.9	1268.12	0.0137135	0.896182	63.1485
471.9	17981.9	897.011	14502.2	1104.47	0.0131938	0.895241	62.4565
473.55	18121.6	889.953	14614	1195.38	0.0141068	0.894168	62.6961
475.2	18252.4	911.205	14677.7	1220.7	0.0138414	0.893164	63.5501
476.85	18385.8	943.138	14720.7	1378.93	0.0135133	0.89219	64.1367
478.5	18522.7	911.375	14777.3	1402.25	0.0141454	0.891109	65.0429
480.15	18653.6	900.168	14823.4	1417.82	0.0138837	0.890209	64.9605
481.8	18787.1	924.902	14914.1	1538.35	0.0135204	0.889274	63.4567
483.45	18924.3	1035.08	15080	1394.29	0.0146298	0.888265	62.3404
485.1	19051.3	1009.35	15225.5	1374.26	0.013985	0.887208	61.0079
486.75	19184.3	1001.1	15381.1	1414.65	0.0142622	0.886301	60.1098
488.4	19314.8	999.084	15515.3	1519.21	0.0141359	0.885558	59.1261
490.05	19446.6	943.663	15659	1544.09	0.0140178	0.884876	58.9076
491.7	19579.6	902.226	15772.7	1569.77	0.0146049	0.884179	59.7359
493.35	19707.4	866.448	15831.2	1536.65	0.0151794	0.88338	60.5699
495	19830.5	944.424	15887.8	1593.28	0.0142869	0.882635	61.0474
496.65	19961.3	963.014	15963.6	1618.02	0.0140811	0.881919	61.8094
498.3	20094.2	930.084	16025.4	1640.46	0.014403	0.881167	62.5978
499.95	20224.2	953.859	16085.8	1649.43	0.015308	0.880381	63.6099
501.6	20346.6	1000.36	16134.5	1700.49	0.014398	0.879567	62.9223
503.25	20476.9	998.694	16274.1	1738.5	0.0153022	0.878947	61.0333
504.9	20599.6	999.001	16486.5	1679.64	0.0149647	0.878295	58.7707
506.55	20725.1	1017.95	16726	1704.51	0.0145125	0.877488	57.504
508.2	20854.7	1106.11	16912.9	1807.07	0.0155239	0.876757	57.9178
509.85	20975.9	1046.63	17004.8	1807.37	0.0148422	0.875908	57.9452
511.5	21102.9	1116.05	17125.2	1914.86	0.0152709	0.875295	58.382
513.15	21226.3	1064.5	17219.1	1937.84	0.0147048	0.874441	59.2457
514.8	21354.6	1019.57	17290.6	2017.88	0.0151163	0.873782	60.4216
516.45	21479.5	1006.38	17340.7	2037.02	0.0144599	0.87313	61.1264
518.1	21610.2	1011.69	17423.9	1993.57	0.0154599	0.872375	60.1321
519.75	21732.6	948.363	17616.5	2019.48	0.0144475	0.871653	57.6613
521.4	21863.6	968.738	17920	1902.31	0.0139189	0.870962	55.4615
523.05	21999.7	928.228	18216.3	1973.73	0.0148982	0.87015	54.8777
524.7	22127	934.334	18394	1993.03	0.0140025	0.869509	55.3112
526.35	22262.5	888.572	18502.5	1932.77	0.0134903	0.868807	55.8088
528	22403.3	950.567	18603.1	1984.5	0.0138306	0.867986	56.1336
529.65	22540.7	1049.23	18716.5	2010.87	0.0143312	0.867283	55.3135
531.3	22673.5	1028.75	18914.2	1918.73	0.0142712	0.866614	54.2892
532.95	22806.9	1093.07	19116	1861.25	0.0136973	0.865988	53.6757
534.6	22946	1058.15	19292.5	1880.11	0.0136112	0.865186	54.0142
536.25	23086.1	1019.54	19404.1	1898.48	0.013663	0.864522	54.3488
537.9	23225.8	1006.22	19516.3	1841.94	0.0145497	0.863897	54.9831
539.55	23357.1	963.462	19606.8	1786.76	0.0139031	0.863368	55.2751
541.2	23494.5	973.592	19716.9	1792.96	0.0131784	0.862614	55.5565
542.85	23639.7	910.249	19825	1921.14	0.0137402	0.861829	56.1903
544.5	23779	984.419	19915.6	1981.32	0.0136795	0.86112	56.9201
546.15	23919.1	1041.89	20000.4	1973.2	0.012615	0.860581	57.5007
547.8	24071.1	1072.87	20095.4	2013.47	0.0123153	0.859904	58.3389
549.45	24226.9	1110.97	20171.7	1935.41	0.0120781	0.859099	59.0736
551.1	24385.9	1130.18	20253.9	2044.52	0.0126377	0.858606	58.4822
552.75	24537.9	1097.08	20420.6	1937.82	0.0118665	0.857911	57.1956
554.4	24700	1030.56	20632.4	1968.26	0.0127387	0.857057	56.3361
556.05	24851.2	1070.92	20820.7	1885.17	0.0113669	0.856384	54.9188
557.7	25020.7	995.668	21038.9	1850.61	0.011604	0.855787	53.2502
559.35	25186.8	1031.06	21275.2	1792.08	0.0115504	0.855122	52.874
561	25353.9	1012.35	21429.3	1857.41	0.0116908	0.854431	54.9005
562.65	25519	996.076	21425.9	1919.55	0.0109084	0.853556	54.5497
564.3	25696.3	958.281	21581.6	1832.62	0.0113104	0.852993	55.6103
565.95	25867.3	944.809	21641	1953	0.0116333	0.852282	55.7545
567.6	26033.7	962.347	21758.9	2006.72	0.0114921	0.851726	57.4393
569.25	26202.3	990.235	21778.4	2066.16	0.0118048	0.851085	57.1166
570.9	26366.5	902.699	21936.9	2141.19	0.0117168	0.850526	59.2227
572.55	26532.1	837.991	21927.9	1994.19	0.0114545	0.849833	58.9151
574.2	26701.6	873.744	22083.2	2040.02	0.0116754	0.849178	60.35
575.85	26868	857.555	22119.4	2206.95	0.0116634	0.848739	61.6353
577.5	27034.7	893.39	22167	2249.97	0.0115279	0.848143	60.9776
579.15	27203.4	856.9	22354.8	2199.55	0.0116505	0.847186	61.8548
580.8	27370.6	844.696	22436.4	2197.67	0.0115769	0.847041	62.5378
582.45	27538.9	803.862	22526.4	2106.41	0.0121059	0.846036	63.1054
584.1	27700	726.664	22626	2153.42	0.0133763	0.84594	62.3548
585.75	27845.8	707.112	22811.2	2151.06	0.012582	0.845312	62.8646
587.4	28000.9	657.478	22917.3	2181.36	0.0124985	0.845194	63.4908
589.05	28157.1	694.426	23012.9	2258.92	0.0134647	0.844952	65.6978
590.7	28302.2	703.92	22996	2226.95	0.0130391	0.84439	64.8147
592.35	28452	750.928	23202.2	2173.34	0.0121823	0.842978	64.2757
594	28612.7	803.109	23379.3	2221.72	0.0123444	0.842925	65.5103
595.65	28771.3	807.747	23430.3	2326.26	0.01362	0.842355	65.1945
597.3	28915.1	749.062	23598.6	2327.65	0.0139147	0.842113	62.6637
598.95	29055.9	767.69	23921.8	2348.83	0.0132689	0.841497	62.3372
600.6	29203.7	874.717	24103.5	2380.98	0.0131791	0.841341	62.6755
602.25	29352.5	836.403	24233.5	2223.02	0.0137748	0.840959	61.9016
603.9	29494.9	800.588	24454.4	2337.99	0.0141936	0.840356	61.7867
605.55	29633.2	854.875	24624.1	2344	0.014682	0.839463	59.5953
607.2	29767.1	907.874	24966.4	2300.95	0.0143068	0.838535	59.6917
608.85	29904.6	859.479	25131.1	2333.83	0.0139886	0.837957	59.8741
610.5	30045.4	856.299	25285.8	2327.23	0.0144864	0.837746	59.6729
612.15	30181.4	929.567	25469.9	2407.29	0.0133749	0.836788	59.0384
613.8	30328.8	961.373	25706.3	2366.69	0.0126835	0.836037	58.9378
615.45	30484.4	981.691	25890.1	2410.42	0.0128567	0.835801	59.4078
617.1	30638	940.13	26018.3	2375.42	0.013154	0.835593	58.9894
618.75	30788.1	865.509	26223.1	2390.18	0.0131091	0.834932	59.305
620.4	30938.8	883.421	26364.9	2451.81	0.0128943	0.834088	59.145
622.05	31092.2	881.174	26549.3	2381.7	0.0131005	0.833414	58.6443
623.7	31243.4	881.707	26764.6	2396.88	0.0136844	0.832478	59.1174
625.35	31388.2	916.155	26896.9	2417.47	0.0130367	0.831359	59.1004
627	31540.4	893.635	27072.1	2386.43	0.0123605	0.831562	58.9528
628.65	31701	883.357	27251.8	2396.06	0.0125577	0.8313	59.115
630.3	31859	879.936	27407.1	2278.01	0.0127816	0.830521	59.243
631.95	32014.5	881.019	27567.9	2309.1	0.0123243	0.830181	60.7283
633.6	32175.7	816.308	27610.6	2350.13	0.0134903	0.829806	62.5693
635.25	32323.1	923.757	27624.8	2158.18	0.013893	0.829622	60.1637
636.9	32466.3	839.164	27962.1	2234.9	0.0137578	0.82927	62.6354
638.55	32610.9	818.56	27926.5	2033.28	0.0131945	0.82775	61.2053
640.2	32762	817.883	28200	2095.85	0.0134216	0.826708	61.1144
641.85	32910.7	851.742	28359	2266.41	0.0130233	0.826335	61.5401
643.5	33064	873.269	28481	2313.02	0.0117924	0.825224	62.8569
645.15	33233.6	905.529	28542.5	2402.47	0.0121322	0.825229	65.3634
646.8	33398.4	816.028	28501.7	2312.69	0.0128945	0.823258	64.3561
648.45	33553.8	802.283	28753.8	2004.9	0.0138841	0.822511	63.0873
650.1	33698.3	832.082	28992.7	2134.71	0.0140391	0.822478	64.0958
651.75	33841.2	806.709	29063.3	2167.91	0.0133142	0.822545	64.8211
653.4	33991.8	770.183	29157.2	2227.09	0.0134467	0.821441	65.7783
655.05	34141.2	881.735	29241.3	2148.41	0.0127537	0.819028	65.9516
656.7	34299.2	856.513	29389.9	1978.59	0.0117925	0.819588	63.5658
658.35	34469.9	877.34	29690.2	2073.79	0.0118318	0.818871	64.4643
660	34640.2	864.567	29768.1	2070.14	0.0123587	0.818076	63.0637
661.65	34803.4	925.539	30007.8	2068.13	0.012208	0.817152	60.967
663.3	34968.8	868.928	30300.3	2141.5	0.0133038	0.816225	61.2068
664.95	35120.8	910.282	30441.2	2072.55	0.0134493	0.815577	61.4471
666.6	35271.2	897.892	30580.7	1971.05	0.0137878	0.814506	61.2753
668.25	35418.1	912.506	30750.8	1932.37	0.0137029	0.813514	61.084
669.9	35566.1	898.235	30921.2	1956.71	0.0140524	0.813482	61.4279
671.55	35710.5	848.351	31048.5	1949.95	0.0144324	0.813157	62.3505
673.2	35851.1	865.058	31133.4	1912.78	0.0138561	0.812351	60.5923
674.85	35997.6	831.946	31413.8	2018.99	0.0138109	0.811741	60.1378
676.5	36144.8	889.316	31607	2080.62	0.0141266	0.810992	61.205
678.15	36288.8	885.242	31687.7	2072.38	0.0130364	0.809651	61.2583
679.8	36445.2	836.229	31849.7	2067.04	0.0138633	0.808056	61.5812
681.45	36592.5	810.092	31989.9	2158.78	0.0131879	0.807456	63.7711
683.1	36747.4	806.336	31982.2	2237.65	0.0136964	0.807045	65.7896
684.75	36896.7	851.263	31986.7	2054.99	0.0140733	0.806455	63.7597
686.4	37042.1	800.317	32299.1	1983.75	0.0142325	0.806226	63.6977
688.05	37185.9	766.208	32448.5	1978.75	0.0142726	0.805874	63.6345
689.7	37329.3	723.109	32599.4	1973.67	0.0142957	0.805063	61.1245
691.35	37472.7	728.109	32937.7	2079.3	0.015991	0.803658	60.0107
693	37601.1	672.572	33194.7	1993.54	0.015576	0.801822	61.1567
694.65	37733.2	676.275	33279.8	1978.64	0.0160589	0.800588	62.7593
696.3	37861.5	632.763	33324	1831.02	0.0161521	0.800471	63.2593
697.95	37989.1	612.799	33446.7	1641.97	0.017716	0.800308	62.4978
699.6	38105.5	576.104	33653	1579.83	0.018849	0.799846	62.0185
701.25	38215	591.299	33832.1	1602.17	0.0194733	0.799401	61.0177
702.9	38321	580.366	34057.2	1769.97	0.0164111	0.798956	59.5997
704.55	38446.8	609.925	34323.2	1753.1	0.0178558	0.798261	59.4939
706.2	38562.6	598.598	34506.9	1796.46	0.0169022	0.797311	61.0461
707.85	38685	610.511	34555.3	1724.22	0.017597	0.796346	60.8102
709.5	38802.7	633.223	34746.4	1819.36	0.0177022	0.795784	63.4346
711.15	38919.9	617.652	34706.5	1876.67	0.018007	0.795022	64.3989
712.8	39035.1	611.406	34798.6	1941.59	0.0174567	0.794352	64.4072
714.45	39154.1	577.017	34967.6	1803.51	0.0179403	0.793696	64.0889
716.1	39270	608.046	35146.5	1870.4	0.0179916	0.792969	64.8233
717.75	39385.6	645.348	35248.1	1865.71	0.0161921	0.792509	63.9289
719.4	39514.2	650.029	35461.7	1874.75	0.0160539	0.791687	64.1891
721.05	39644	657.817	35595.2	1879.73	0.0155646	0.791029	64.6046
722.7	39778.1	691.033	35714.4	1973.55	0.0148	0.7902	64.0847
724.35	39919.2	673.999	35896.4	1975.98	0.0153496	0.789566	63.2837
726	40055.3	663.687	36103.2	1971.51	0.0162237	0.788868	64.3491
727.65	40184.2	636.434	36178.6	2100.37	0.016062	0.788299	63.3022
729.3	40314.5	653.017	36407.2	2002.61	0.0152821	0.787572	64.3426
730.95	40451.6	672.037	36487.6	2106.55	0.0163221	0.78679	64.8465
732.6	40580.1	690.423	36604.6	2006.47	0.0145202	0.785958	64.5514
734.25	40724.7	745.373	36785	1910.61	0.0142407	0.785472	63.5059
735.9	40872.2	767.669	37008.4	1892.09	0.0140137	0.784968	63.9976
737.55	41022.2	705.695	37121.7	1911.1	0.0148927	0.784289	65.2003
739.2	41163.5	698.975	37187.1	1905.21	0.0153123	0.783184	65.2826
740.85	41301	699.564	37331.2	1926.89	0.0148672	0.782725	65.7434
742.5	41442.8	713.721	37445.8	1774.29	0.0141299	0.781875	65.1371
744.15	41592.2	668.308	37618.8	1848.04	0.0136486	0.781065	67.1299
745.8	41747	707.731	37630.5	1885.94	0.0131136	0.779701	67.9407
747.45	41908.3	696.457	37719.3	1803.12	0.0127858	0.779295	66.5516
749.1	42073.9	774.627	37934	1500.92	0.0127573	0.779337	64.0693
750.75	42239.9	725.779	38186.3	1436.1	0.0135402	0.778615	63.9269
752.4	42396.4	750.589	38303.3	1678.5	0.0139849	0.777391	64.6302
754.05	42548.2	771.944	38390.1	1503.99	0.0139804	0.77626	64.6207
755.7	42700.2	816.583	38516.1	1567.31	0.0137637	0.775927	65.4463
757.35	42854.7	808.677	38589.9	1444.86	0.0150192	0.775629	64.1545
759	42996.4	785.484	38784.2	1451.47	0.0151884	0.775147	65.8898
760.65	43136.5	792.324	38808.1	1401.49	0.0150064	0.774585	65.1237
762.3	43278.5	827.64	38969.2	1436.44	0.0145252	0.774231	64.4716
763.95	43425.2	843.889	39124.1	1393.53	0.0145974	0.773717	63.5815
765.6	43571.3	826.542	39291.4	1574.24	0.0142854	0.772863	63.6609
767.25	43720.7	810.45	39408.9	1593.74	0.014212	0.772142	62.4987
768.9	43871.1	783.653	39612	1675.32	0.0140433	0.771503	64.3278
770.55	44023.4	773.704	39633.9	1783.52	0.0137281	0.771033	65.224
772.2	44179.2	750.049	39713.9	1909.08	0.0134748	0.770475	65.7543
773.85	44338.2	748.316	39819.8	1690.4	0.0145839	0.769746	63.8273
775.5	44485.2	723.941	40084.1	1721.87	0.013843	0.769117	65.647
777.15	44640.1	717.291	40106.8	1722.31	0.0144035	0.768806	62.8357
778.8	44789.1	740.933	40413.5	1567.96	0.014423	0.767667	62.731
780.45	44938.2	696.912	40556.2	1709.39	0.0146211	0.766754	62.7314
782.1	45085.3	670.323	40702.8	1725.03	0.0153235	0.765933	64.211
783.75	45225.9	680.058	40753.2	1709.57	0.0153795	0.765492	64.6611
785.4	45366.1	681.091	40872.4	1537.75	0.0155072	0.764934	63.9204
787.05	45505.2	682.317	41074	1427.76	0.0160732	0.764623	62.9651
788.7	45639.4	703.969	41276.5	1486.9	0.0163545	0.76415	62.3738
790.35	45771.5	662.175	41459.8	1470.42	0.0170935	0.763793	61.2221
792	45897.8	683.008	41694.3	1486.8	0.0177649	0.763338	60.8047
793.65	46019.5	698.574	41887.4	1490.31	0.0167908	0.762555	60.6563
795.3	46148.4	703.91	42068.5	1506.32	0.0163478	0.761998	62.0219
796.95	46280.8	703.934	42133.2	1414.79	0.0168477	0.760942	62.3001
798.6	46409.5	770.943	42281.9	1361.35	0.0189591	0.759826	61.7661
800.25	46524.1	760.783	42480.9	1365.9	0.0175161	0.758935	61.3228
801.9	46648.2	763.661	42668.9	1408.96	0.0168701	0.757976	61.3592
803.55	46777.2	815.03	42825.8	1334.51	0.0157259	0.756972	62.0074
805.2	46915.8	843.063	42933	1345.16	0.0158234	0.755868	61.5968
806.85	47053.8	867.542	43106	1406.18	0.0153118	0.75493	59.7392
808.5	47196.5	883.245	43376.4	1465.04	0.0159969	0.75411	60.7045
810.15	47333.3	864.638	43462.5	1508.26	0.0146727	0.753468	59.4582
811.8	47482.6	884.938	43698.1	1580.16	0.0143019	0.75265	60.4246
813.45	47635.9	896.489	43786.5	1645.52	0.0144209	0.752032	59.2251
815.1	47788	887.107	44024.4	1680.62	0.0134896	0.751072	59.5194
816.75	47950.9	918.777	44164.8	1738.92	0.0120428	0.750024	59.7087
818.4	48133.5	964.763	44315.7	1818.08	0.0115472	0.749119	61.9589
820.05	48324.3	970.295	44317.5	1778.46	0.0121865	0.748669	61.6493
821.7	48505.1	999.572	44489.4	1832.24	0.0127855	0.748155	63.5562
823.35	48677.6	1018.57	44513.3	1854.87	0.0120673	0.747675	64.4799
825	48860.5	1032.83	44606.3	1792.12	0.012041	0.747157	64.7588
826.65	49043.9	1047.4	44740.8	1815.26	0.0131505	0.746563	65.6157
828.3	49212	1072.16	44835.5	1777.11	0.0124757	0.745766	65.11
829.95	49389.3	1038.7	45022.3	1684.88	0.0123711	0.74483	64.735
831.6	49568.4	1078.62	45194.7	1664.33	0.0123629	0.743707	64.6145
833.25	49747.8	1075.98	45348.7	1644.46	0.0131044	0.743049	64.6625
834.9	49917.3	1099.62	45488.5	1590.92	0.0134404	0.742609	65.0089
836.55	50082.6	1058.01	45604.8	1564.76	0.0133529	0.74176	65.6072
838.2	50249.2	1080.07	45706.3	1387.66	0.0129703	0.740943	63.134
839.85	50420.9	1059.93	45976.8	1470.26	0.0138355	0.74022	62.091
841.5	50582	1042.73	46167.6	1472.75	0.0137654	0.73939	62.6034
843.15	50744.1	1042.4	46273.8	1520.5	0.0136729	0.738581	64.9722
844.8	50907.5	1030.49	46269.8	1306.11	0.0139819	0.737773	63.4468
846.45	51067.5	1017.13	46481.8	1437.24	0.0136767	0.737287	61.9811
848.1	51231.1	1011.91	46687.5	1538.06	0.0136407	0.736767	61.7614
849.75	51395.3	1019.41	46835.7	1539.99	0.0138773	0.736048	62.1416
851.4	51556.8	985.39	46954.4	1581.62	0.0132326	0.735213	62.2358
853.05	51726.4	960.437	47092.2	1589.04	0.0138189	0.734411	63.4541
854.7	51889	982.963	47161.8	1603.22	0.0141358	0.733679	61.9508
856.35	52048.1	954.39	47401	1617.76	0.0146108	0.733116	61.7232
858	52202.1	930.667	47570.8	1600.63	0.0143428	0.732553	62.1767
859.65	52359.2	925.272	47696	1824.36	0.0151425	0.731949	60.3196
861.3	52508	902.557	47995	1756.13	0.0158996	0.731399	58.3052
862.95	52649.9	891.305	48352.3	1754.72	0.0160441	0.730747	58.8083
864.6	52790.7	861.001	48497	1704.97	0.0148467	0.729961	60.0168
866.25	52942.9	866.459	48582.5	1778.8	0.0154769	0.729197	59.9187
867.9	53089.1	840.192	48772.7	1629.8	0.0156631	0.728712	58.575
869.55	53233.7	850.132	49065.9	1688.46	0.0159789	0.728526	58.1986
871.2	53375.4	814.989	49265.8	1692.96	0.0165906	0.728222	59.2744
872.85	53512	820.77	49360.8	1667.04	0.0153414	0.727914	57.9083
874.5	53659.7	831.283	49649.7	1581.24	0.0168922	0.727675	58.0276
876.15	53794	817.115	49817.1	1542.86	0.0169467	0.727468	58.0607
877.8	53927.8	813.777	49983.7	1560.4	0.0176702	0.727006	59.4112
879.45	54056.2	813.555	50053.3	1584.74	0.0175649	0.7268	59.8009
881.1	54185.5	809.969	50192.3	1627.74	0.015965	0.726305	59.604
882.75	54327.8	816.856	50380.2	1562.13	0.0150235	0.725768	58.8564
884.4	54479.1	828.73	50600.1	1644.3	0.0164109	0.725942	60.9742
886.05	54617.6	818.209	50610.1	1673.27	0.0156407	0.725783	60.3535
887.7	54763	844.484	50818	1730.96	0.0155931	0.725414	61.5069
889.35	54908.8	839.164	50900.8	1725.79	0.0163413	0.724694	60.5054
891	55048.2	866.342	51137.1	1749.94	0.0149238	0.724009	60.8056
892.65	55200.9	895.364	51283.4	1718.43	0.0143744	0.723316	60.2647
894.3	55359.6	867.756	51489.2	1778.87	0.0138871	0.72266	60.1587
895.95	55524	878.217	51667.4	1647.28	0.0151446	0.722107	59.1939
897.6	55674.9	899.648	51904	1661.78	0.0156621	0.721769	59.8703
899.25	55820.8	910.31	52017.9	1612.8	0.0151444	0.721144	59.9199
900.9	55971.9	927.54	52173.1	1642.92	0.0150363	0.720546	60.0237
902.55	56124.2	946.487	52325.9	1574.51	0.0145061	0.72001	59.6166
904.2	56282.2	951.808	52505.8	1549.59	0.0146524	0.719288	60.5815
905.85	56438.7	969.691	52591.8	1584.93	0.0134803	0.718754	61.7743
907.5	56609	977.3	52662.7	1676.74	0.0136499	0.717866	60.4144
909.15	56777.4	988.699	52899.6	1610.8	0.0134937	0.71719	59.955
910.8	56947.9	1002.93	53080.3	1598.62	0.0143488	0.717062	60.4789
912.45	57108.3	1008.72	53192.7	1541.65	0.0143614	0.716998	60.1757
914.1	57268.5	1006.26	53354.3	1466.75	0.0146293	0.716382	60.8969
915.75	57426	1037.83	53451.9	1523.42	0.0148588	0.715775	61.1087
917.4	57581.1	1040.86	53584.5	1322.45	0.0151461	0.715215	59.6877
919.05	57733.4	1017.61	53811	1329.25	0.0160185	0.714955	61.7318
920.7	57877.5	1032.02	53827.6	1269.19	0.0158156	0.714696	62.2639
922.35	58023.5	1017.61	53931.7	1256.68	0.0168405	0.713689	62.6797
924	58160.8	1043.24	54041.9	1338.35	0.0168236	0.71362	61.3381
925.65	58298.2	1041.78	54252.6	1393.36	0.0153775	0.713807	60.2353
927.3	58448.5	1057.07	54470.3	1315.77	0.0158982	0.714103	61.2894
928.95	58593.8	1054.57	54544.8	1387.86	0.0162144	0.713986	62.1845
930.6	58736.4	1100.48	54630.9	1362.23	0.0152085	0.713156	61.445
932.25	58888.5	1100.07	54827.5	1371.75	0.0161891	0.713051	62.705
933.9	59031.4	1117.86	54894.5	1394.18	0.0166735	0.713116	62.0036
935.55	59170.2	1123.27	55079.1	1382.5	0.017398	0.712747	60.3932
937.2	59303.3	1153.77	55345.6	1405.81	0.0175312	0.713045	60.1918
938.85	59435.3	1160.26	55522	1305.17	0.0170395	0.712813	61.0427
940.5	59571.1	1168.48	55618.9	1280.14	0.0179675	0.712183	62.1693
942.15	59700.1	1182.48	55699.1	1323.61	0.0174097	0.711276	62.5571
943.8	59833.3	1202.89	55825.8	1330.52	0.0167374	0.710164	62.0364
945.45	59972.1	1217.17	56017.5	1387.69	0.0169827	0.709524	61.597
947.1	60109	1244.07	56205.1	1407.29	0.0167316	0.70933	61.2925
948.75	60248.1	1977.55	56384	1525.11	0.0171175	0.708774	60.3184
950.4	60384.1	1969.2	56624.1	1566.81	0.0165589	0.708196	59.5902
952.05	60524.8	1962.55	56849.6	1518.61	0.0164503	0.707496	59.2177
953.7	60666.5	1951.72	57045.5	1552.78	0.016009	0.706503	59.3603
955.35	60812.4	1931.54	57201.7	1584.28	0.017281	0.705471	60.5192
957	60947.8	1971.1	57288.1	1594.3	0.0162141	0.704491	60.7061
958.65	61092.2	1978.64	57438.5	1591.59	0.0157337	0.703423	60.702
960.3	61241.3	1963.28	57599.6	1538.62	0.0156602	0.702776	60.3327
961.95	61391.2	1952.92	57777	1590.48	0.0158541	0.702372	61.0722
963.6	61539.4	1976.7	57877.9	1608.08	0.0163205	0.701703	61.6024
965.25	61683.5	2003.84	57994.6	1555.07	0.0163348	0.701024	61.8269
966.9	61827.6	2091.5	58124	1585.63	0.0157576	0.700325	62.5257
968.55	61977.1	2066.05	58224.2	1632.68	0.0159226	0.699673	59.979
970.2	62125.2	2105.03	58530.8	1653.83	0.0161032	0.698906	61.162
971.85	62271.8	2162.99	58607.1	1766.52	0.0157205	0.698291	61.3409
973.5	62422.1	2158.86	58742.5	1674.23	0.0152332	0.697777	59.1271
975.15	62577.3	2158.75	59030.8	1699.92	0.0154348	0.696959	60.7231
976.8	62730.7	2209.33	59080.1	1690.74	0.0153422	0.696298	61.2251
978.45	62885.2	2277.27	59191.9	1742.55	0.0144757	0.695676	62.6493
980.1	63049	2284.25	59248.1	1778.21	0.0141612	0.694831	63.2269
981.75	63216.7	2274.95	59352.7	1766.09	0.0142341	0.694115	61.7609
983.4	63383.7	2335.53	59573.5	1846.09	0.0142769	0.693465	64.2074
985.05	63550.4	2318.38	59573	1914	0.0134781	0.692628	63.6203
986.7	63727.1	2359.68	59739.2	1975.75	0.0136437	0.691582	62.3431
988.35	63902	2473.02	59954	1974.25	0.0132562	0.690517	62.3012
990	64082.2	2432.41	60099.1	1969.76	0.0124567	0.689376	62.1134
991.65	64274.4	2358.06	60254.7	1977.9	0.0128206	0.688426	61.0055
993.3	64461.3	2224.49	60461	1964.03	0.0133803	0.687404	61.0299
994.95	64640.7	2202.42	60606.2	1960.67	0.0151027	0.686314	60.1586
996.6	64799.9	2225.91	60809.1	1930.56	0.0143	0.685234	59.4202
998.25	64968.3	2375.08	60994.5	1984.75	0.0146709	0.684153	59.838
999.9	65132.7	2392.23	61120.4	1976.88	0.0131213	0.683147	58.3508
1001.55	65316.8	2390.42	61367.4	1949.09	0.0127197	0.682235	57.6324
1003.2	65506.9	2390.75	61564	1980.64	0.0127969	0.680983	57.843
1004.85	65696.2	2435.58	61701.8	2007.4	0.0126905	0.679794	58.3745
1006.5	65887.5	2419.48	61820.4	2094.18	0.012328	0.678836	59.106
1008.15	66084.7	2390.75	61929.7	2053.57	0.0131306	0.677909	57.5539
1009.8	66270	2461.54	62177.1	2118.68	0.0123535	0.67704	58.3828
1011.45	66467.3	2461.38	62278.4	2166.08	0.0121605	0.676226	57.9017
1013.1	66668	2368.87	62464	2156.76	0.0122567	0.675145	57.7461
1014.75	66867.4	2330.52	62634.3	2159.76	0.0120183	0.67408	57.0148
1016.4	67071	2292.26	62840	2265.54	0.0120404	0.6733	57.3416
1018.05	67274.6	2245.71	62983.7	2302.86	0.0118636	0.672473	57.3027
1019.7	67481.4	2069.28	63157.3	2253.41	0.0124546	0.672059	55.7177
1021.35	67678.5	2031.63	63434.7	2354.01	0.0128814	0.671413	56.2488
1023	67869.3	1993.86	63570.1	2312.32	0.0128943	0.670647	55.6679
1024.65	68060.1	1976.03	63792.5	2379.38	0.0128566	0.669846	56.5088
1026.3	68251.7	1978.86	63912.7	2482.15	0.0125612	0.669258	56.2508
1027.95	68448	1957.44	64117.6	2422.03	0.0126643	0.668501	56.0091
1029.6	68642.9	1931.63	64331.9	2334.58	0.0129534	0.667644	55.6966
1031.25	68833.6	1916	64544.5	2153.78	0.0133122	0.666757	56.054
1032.9	69019.5	1929.73	64696.3	2230.48	0.0137513	0.666145	56.4832
1034.55	69199.7	1995.69	64833	2215.2	0.0134604	0.665349	59.8872
1036.2	69383.9	2028.1	64776.2	2233.58	0.0124962	0.66462	59.2551
1037.85	69582.6	1931.39	64990	2400.72	0.0145398	0.663347	59.2263
1039.5	69753.6	2006.21	65167.5	2390.16	0.0145727	0.662371	56.9586
1041.15	69924.6	2079.2	65532.4	2390.79	0.0135905	0.661475	55.8923
1042.8	70108.1	2122.64	65809.7	2466.6	0.0129918	0.660488	56.0649
1044.45	70300.4	2167.78	65997.4	2352.94	0.0130548	0.659569	55.3323
1046.1	70492	2047.56	66248.1	2461.56	0.0133749	0.658624	54.6341
1047.75	70679.4	1986.62	66505.8	2461.34	0.0144159	0.657748	55.6543
1049.4	70853.4	1976.31	66630.7	2376.04	0.0152326	0.656865	53.518
1051.05	71018.3	1965.55	67008.8	2303.31	0.0150177	0.656104	52.9971
1052.7	71185.7	1922.52	67259.6	2258.77	0.0152263	0.655318	52.9416
1054.35	71351.1	1825.74	67475.9	2070.32	0.0159285	0.654532	51.8616
1056	71509.4	1766.11	67760	2016.06	0.0161731	0.653807	51.6049
1057.65	71665.4	1736.32	67974.6	1972.48	0.017228	0.653133	51.021
1059.3	71812	1681.38	68214.1	1982.42	0.017806	0.652374	51.6054
1060.95	71954.1	1664.32	68368.7	1967.74	0.0183274	0.651638	51.9347
1062.6	72092.2	1718.96	68543.3	1945.05	0.0167902	0.650978	51.9242
1064.25	72243.2	1733.36	68741	1918.4	0.0164256	0.65031	51.3908
1065.9	72397.7	1751.17	68972.2	1912.4	0.0168842	0.649677	50.7842
1067.55	72548.1	1781.12	69200.4	1995.96	0.0161188	0.648925	50.5656
1069.2	72705.8	1813.85	69406.4	2032.04	0.0165302	0.648256	51.1462
1070.85	72859.8	1877.88	69563.8	1926.62	0.0162531	0.647659	52.1212
1072.5	73016.6	1937.06	69675.2	1954.89	0.0161295	0.646936	52.4041
1074.15	73174.7	1993.19	69831.1	2056.89	0.0157483	0.646345	52.3723
1075.8	73336.8	2038.02	70013.5	2100.43	0.0152984	0.64561	51.0071
1077.45	73503.8	2089.16	70308.5	2169.67	0.0145018	0.644773	53.1349
1079.1	73680.3	2021.79	70345.7	2221.14	0.0144365	0.644276	54.711
1080.75	73857.7	1975.5	70422.5	2070.2	0.0148899	0.6438	53.5326
1082.4	74029.8	1946.02	70698.9	1980.24	0.0154047	0.643282	52.7588
1084.05	74196.3	1938.82	70924.4	1974.5	0.0159697	0.642602	53.046
1085.7	74357.1	1912.91	71075.4	1960.1	0.0161272	0.641785	54.0705
1087.35	74516.5	1902.29	71180.5	1924.66	0.0162053	0.640925	54.889
1089	74675.4	1876.68	71298	1876.75	0.0161666	0.640317	56.6238
1090.65	74834.8	1863.04	71355.2	1821.79	0.016578	0.639771	56.1308
1092.3	74990.4	1837.62	71546.2	1752.81	0.0168063	0.639522	56.6059
1093.95	75143.9	1818.19	71674.2	1735.1	0.0182604	0.63901	57.8409
1095.6	75285.3	1841.83	71753.3	1692.8	0.0180234	0.638444	58.1859
1097.25	75428.7	1833.31	71881	1667.97	0.0183363	0.637839	59.3979
1098.9	75569.8	1805.62	71959.4	1664.05	0.0184789	0.637432	60.3029
1100.55	75709.8	1770.7	72051.3	1716.06	0.0199402	0.636773	61.223
1102.2	75839.8	1799.68	72148.5	1722.94	0.0191233	0.636399	59.7852
1103.85	75975.4	1813.81	72388.6	1749.35	0.0178234	0.635938	59.3454
1105.5	76120.9	1819.6	72568.2	1785.12	0.0173197	0.635532	59.9204
1107.15	76270.8	1821.31	72693.3	1808.45	0.0165977	0.63486	60.3786
1108.8	76427.4	1820.05	72824.2	1864.8	0.0168225	0.634367	60.3167
1110.45	76582	1827.51	72986.8	1924.49	0.0160921	0.633612	61.0346
1112.1	76743.9	1845.98	73105.5	1974.65	0.0157352	0.632577	60.5313
1113.75	76909.6	1827.19	73303.3	2027.64	0.0147825	0.632076	60.0547
1115.4	77086.2	1793.38	73502.9	2089.52	0.0146554	0.631326	58.999
1117.05	77264.5	1794.39	73755.8	1992.95	0.0158287	0.630998	57.3016
1118.7	77429.8	1780.22	74044.2	1943.55	0.0152723	0.630233	57.1058
1120.35	77601.2	1768.47	74226.5	1937.89	0.0156651	0.629672	57.8464
1122	77768.5	1761.82	74345	1913.38	0.0161544	0.628765	58.1415
1123.65	77930.9	1751.21	74491.7	1907.68	0.0157552	0.62781	59.2874
1125.3	78097.7	1729.68	74586.7	1887.07	0.0161965	0.626938	58.7274
1126.95	78260.2	1704.01	74784.7	1863.88	0.0170687	0.626521	58.8745
1128.6	78414.5	1695.33	74935.1	1861.35	0.0173822	0.626366	59.2659
1130.25	78566	1711.16	75067.4	1804.53	0.0176925	0.626041	59.2861
1131.9	78715	1732.08	75215.4	1830.95	0.0167483	0.625511	61.1151
1133.55	78872.5	1712.89	75261.4	1843.05	0.0165566	0.624999	60.9084
1135.2	79032	1679.8	75418.4	1835.01	0.0173252	0.623921	61.6053
1136.85	79184.6	1667.57	75528.1	1816.77	0.0179826	0.623551	60.9563
1138.5	79331.8	1662.66	75704.8	1769.43	0.0183842	0.623476	62.0048
1140.15	79475.7	1658.38	75784	1789.45	0.0180638	0.623006	62.3742
1141.8	79622.3	1626.79	75900.6	1810.83	0.0190692	0.622152	59.5988
1143.45	79761.4	1602.77	76200	1822.74	0.0198212	0.622181	58.8158
1145.1	79895.2	1598.62	76399.5	1818.71	0.0200631	0.621751	57.3082
1146.75	80027.5	1597	76647.6	1830.68	0.0195031	0.621265	57.5734
1148.4	80163.6	1586.39	76797.3	1854.47	0.0192555	0.620775	56.3659
1150.05	80301.7	1550.32	77049.8	1793.17	0.020318	0.619996	55.7171
1151.7	80432.7	1547.89	77275.1	1794.45	0.0210631	0.619298	54.3875
1153.35	80559.2	1535.79	77530.3	1770.96	0.020129	0.618961	54.0493
1155	80691.6	1530.68	77722.4	1764.22	0.0214229	0.618554	55.5242
1156.65	80816.1	1535.71	77798.5	1760.25	0.0204461	0.617711	54.5009
1158.3	80946.8	1538.37	78030.4	1744.42	0.020278	0.616951	55.1139
1159.95	81078.6	1522.74	78161.5	1715.71	0.0216092	0.616192	55.5508
1161.6	81202.6	1521.89	78299.5	1699.35	0.0204116	0.615603	54.9296
1163.25	81333.9	1525.15	78491.2	1692.65	0.020996	0.615034	55.1363
1164.9	81461.6	1524.52	78632.8	1727.67	0.0207905	0.6142	56.2278
1166.55	81590.9	1521.17	78726	1732.67	0.0212327	0.613348	56.2318
1168.2	81717.6	1524.03	78888	1710.8	0.0207885	0.612485	56.502
1169.85	81847.1	1530.17	79036	1678.93	0.0201052	0.611658	55.1173
1171.5	81981.3	1527.78	79268.2	1661.18	0.0198321	0.611206	54.5318
1173.15	82117.4	1524.09	79446.9	1665.34	0.0210099	0.61044	55.2925
1174.8	82246.1	1529.41	79555.4	1639.13	0.0203997	0.609988	55.7707
1176.45	82378.7	1515.34	79675.5	1616.98	0.021159	0.609355	56.219
1178.1	82506.7	1525.18	79793.2	1597.5	0.0223736	0.60874	55.4191
1179.75	82627.8	1543.43	79968.5	1599.42	0.0218741	0.608092	56.3424
1181.4	82751.9	1562.06	80059.5	1595.69	0.0208145	0.607696	56.9926
1183.05	82882.3	1550.22	80165	1586.27	0.0209839	0.607134	57.3741
1184.7	83011.8	1547.78	80286.3	1550.6	0.0221107	0.606651	56.8261
1186.35	83134.8	1559.17	80446.2	1547.64	0.0228246	0.606023	56.0361
1188	83254.1	1575.45	80614.6	1529.98	0.0221215	0.605654	56.8458
1189.65	83377.3	1579.33	80708.3	1530.83	0.0225899	0.605411	58.473
1191.3	83497.9	1589.53	80759.5	1534.56	0.0224719	0.605232	57.1844
1192.95	83619.2	1607.6	80950	1538.43	0.0218962	0.604919	58.2449
1194.6	83743.8	1600.54	81032	1524.15	0.0223586	0.604385	58.4867
1196.25	83865.9	1600.12	81150.1	1520.59	0.023435	0.603372	57.3522
1197.9	83982.6	1627.83	81337.4	1525.24	0.0236845	0.602935	58.5711
1199.55	84098.1	1660.51	81410.2	1527.15	0.0226514	0.602558	58.7487
1201.2	84219	1680.35	81532.2	1520.92	0.0218555	0.601939	58.6389
1202.85	84344.5	1678.51	81667.9	1521.51	0.0214662	0.601196	58.1663
1204.5	84472.3	1703.05	81822.1	1529.35	0.0229418	0.600393	58.9692
1206.15	84592.1	1727.22	81920	1532.54	0.0210298	0.599799	58.7885
1207.8	84722.9	1749.73	82067	1521.13	0.0222533	0.598977	58.1122
1209.45	84846.7	1786	82233.8	1530.9	0.0213872	0.598158	58.1329
1211.1	84975.7	1771.02	82368.8	1514.58	0.0202748	0.59776	57.8746
1212.75	85111.8	1757.83	82510.7	1525.49	0.0210871	0.597268	59.6069
1214.4	85242.8	1751.68	82558	1533.09	0.0208181	0.596916	58.928
1216.05	85375.6	1741.14	82712.4	1555.97	0.0215927	0.59643	60.0141
1217.7	85503.7	1752.73	82791.8	1568.23	0.020112	0.595943	61.402
1219.35	85641.4	1749.62	82859.2	1550.65	0.0199745	0.595239	60.2092
1221	85780.2	1706.41	83046.2	1547.13	0.0197697	0.594526	60.1958
1222.65	85920.6	1721.77	83171.8	1564.2	0.021194	0.593992	60.562
1224.3	86051.6	1711.4	83278.5	1578.79	0.0197716	0.593439	62.3284
1225.95	86192.2	1704.5	83325.9	1577.2	0.0197376	0.592827	62.109
1227.6	86333.3	1700.47	83459.9	1582.77	0.0195463	0.5922	61.7154
1229.25	86475.8	1684.41	83601	1607.88	0.0190946	0.592039	62.9681
1230.9	86621.8	1654.54	83669.8	1606.82	0.0193388	0.591789	62.6388
1232.55	86765.9	1652.09	83809	1594.99	0.0198456	0.591055	62.48
1234.2	86906.6	1666.69	83938.1	1606.63	0.0189355	0.59037	63.8544
1235.85	87054.2	1680.42	84000.3	1636.25	0.0190321	0.589682	64.034
1237.5	87201.2	1661.01	84112.1	1663.97	0.0180386	0.589281	63.5239
1239.15	87356.4	1657.5	84258.3	1686.36	0.0186207	0.588949	62.8282
1240.8	87506.9	1678.94	84417.9	1671.82	0.0185755	0.588655	62.6746
1242.45	87657.8	1749.31	84549	1747.03	0.017919	0.587572	64.2047
1244.1	87814.5	1731.49	84609.9	1719.01	0.0162005	0.586823	63.1567
1245.75	87988.1	1708.89	84789.5	1767.86	0.0180143	0.586696	64.3668
1247.4	88144.2	1712.61	84861.3	1790.62	0.0174244	0.585884	63.0342
1249.05	88305.8	1715.26	85059.8	1756.61	0.0177297	0.584607	62.9145
1250.7	88465	1695.86	85204.7	1760.01	0.0176051	0.584022	63.1184
1252.35	88625.5	1689.67	85330.3	1732.58	0.0181827	0.583172	63.5643
1254	88781.1	1693.65	85444	1754.08	0.0174741	0.582444	61.8101
1255.65	88943.2	1690.64	85666.5	1749.05	0.0175132	0.581342	61.8097
1257.3	89105.3	1655.62	85811.4	1694.68	0.0178258	0.580461	61.3542
1258.95	89264.7	1627.7	85975.1	1735.31	0.018841	0.57983	62.4951
1260.6	89415.8	1618.55	86057	1709.71	0.0190721	0.578698	61.123
1262.25	89565.3	1649.81	86271.6	1701.44	0.0177671	0.57791	60.999
1263.9	89726	1619.51	86423.8	1699.05	0.0185392	0.577264	60.8554
1265.55	89880.1	1602.87	86579.3	1655.26	0.0197049	0.576669	59.7268
1267.2	90025.4	1596	86783.6	1651.79	0.0186811	0.575773	60.5874
1268.85	90178.8	1601.34	86886.6	1664.79	0.0188966	0.575139	60.2746
1270.5	90330.6	1586.93	87052.7	1680.61	0.0194015	0.574189	59.9762
1272.15	90478.7	1586.21	87221.2	1658.37	0.019861	0.573243	59.4478
1273.8	90623.6	1589.74	87408.6	1657.16	0.018999	0.572614	58.5262
1275.45	90775.3	1597.29	87610.9	1701.98	0.0187556	0.571944	60.0803
1277.1	90929.1	1616.28	87685.1	1776.86	0.0185771	0.571556	59.4298
1278.75	91084.5	1596.34	87886.3	1706.32	0.0174163	0.571099	58.2694
1280.4	91250.4	1584.97	88117.9	1712.18	0.0190184	0.570245	56.9768
1282.05	91402.5	1594.36	88354.9	1716.07	0.0190186	0.568501	57.1921
1283.7	91555.1	1592.87	88512.3	1687.18	0.0181748	0.566905	56.8357
1285.35	91715.3	1583.63	88699	1691.29	0.0179258	0.56534	55.9788
1287	91878.1	1582.24	88914	1697.48	0.019088	0.564877	56.9737
1288.65	92031.1	1579.64	89023.4	1671.86	0.0183896	0.564086	56.2621
1290.3	92190.2	1562.42	89227.4	1631.4	0.0190555	0.563163	56.0231
1291.95	92343.9	1555.96	89397.5	1614.53	0.0198873	0.562023	55.8533
1293.6	92491.6	1567.6	89561.6	1650.54	0.0192579	0.561177	56.4855
1295.25	92644.2	1553.67	89692	1624.71	0.0203591	0.559866	57.257
1296.9	92789	1559.87	89814.2	1605.99	0.0203554	0.558747	56.0337
1298.55	92934.1	1565.53	90029.2	1595.82	0.020708	0.557789	55.7982
1300.2	93076.9	1571.71	90199.6	1602.11	0.0210423	0.556676	57.3096
1301.85	93217.8	1585.74	90279.7	1587.43	0.0201564	0.555602	56.8524
1303.5	93365.1	1584.02	90457.4	1585.69	0.0204693	0.554473	55.0634
1305.15	93510.5	1577.95	90698.9	1591.58	0.0212344	0.553209	55.7324
1306.8	93650.9	1582.7	90823.6	1600.9	0.021284	0.552022	56.7052
1308.45	93791.4	1583.44	90933.6	1616.93	0.020308	0.550872	54.823
1310.1	93938.9	1580.25	91200.1	1580.58	0.0210228	0.549682	54.8215
1311.75	94081.7	1579.48	91362.5	1594.76	0.0208308	0.548583	54.0243
1313.4	94226.1	1581.47	91561.3	1592.81	0.021136	0.547359	52.024
1315.05	94368.7	1586.98	91836.1	1576.42	0.0206375	0.546286	52.9358
1316.7	94515	1596.88	91950.6	1592.28	0.0203375	0.545137	53.5005
1318.35	94663.9	1604.48	92082.7	1571.54	0.0201305	0.544089	52.3203
1320	94814.5	1605.9	92305.1	1552.66	0.019005	0.543294	51.6969
1321.65	94974.3	1572.65	92488.3	1568.2	0.0226622	0.542703	52.9248
1323.3	95108.5	1581.82	92582	1551.03	0.0216893	0.542215	51.9495
1324.95	95248.8	1602.02	92778.7	1559.36	0.0206485	0.541553	52.3751
1326.6	95396.3	1610.35	92906.5	1565.61	0.0191432	0.540962	53.0212
1328.25	95555.7	1644.55	93022.2	1565.3	0.0189377	0.540526	52.4402
1329.9	95716.8	1642.49	93192.6	1585.26	0.0190653	0.540118	52.8792
1331.55	95877.1	1648.41	93319.5	1587.68	0.0191449	0.539628	53.2919
1333.2	96036.8	1663.86	93448.1	1577.35	0.0195552	0.539386	53.5843
1334.85	96193.2	1695.58	93578.4	1578.6	0.0188938	0.5388	53.6473
1336.5	96355.3	1703.27	93718.6	1586.51	0.0198025	0.538409	53.0566
1338.15	96510.1	1705.6	93892.7	1579.16	0.0187033	0.538052	53.8974
1339.8	96674	1689.17	93999.5	1581.68	0.01864	0.53779	54.4429
1341.45	96838.6	1670.62	94118.5	1578.5	0.0190367	0.537497	54.8134
1343.1	96999.9	1669.47	94246.6	1582.04	0.0191728	0.537223	54.196
1344.75	97160.1	1672.91	94420.5	1589.08	0.0187025	0.536947	55.3891
1346.4	97324.4	1649.16	94511.4	1596.71	0.0194214	0.53673	55.529
1348.05	97482.7	1651.73	94654.5	1603.2	0.0199027	0.536584	56.2358
1349.7	97637.2	1660.02	94771.1	1619.1	0.0193746	0.536501	56.1438
1351.35	97795.9	1635.78	94933.5	1569.72	0.0193367	0.536628	56.2624
1353	97954.9	1652.03	95068.5	1579.43	0.0205602	0.536679	56.2516
1354.65	98104.4	1630.5	95207.2	1587.72	0.0193222	0.536644	55.5092
1356.3	98263.6	1623.7	95388.4	1608.29	0.0206638	0.536755	59.473
1357.95	98412.3	1623.38	95345.1	1635.18	0.020461	0.537224	58.8538
1359.6	98562.4	1611.66	95529.8	1645.01	0.0204219	0.538127	58.5197
1361.25	98712.6	1623.27	95703.1	1641.98	0.0216482	0.538691	57.6966
1362.9	98854.1	1642.61	95903.1	1649.37	0.020307	0.538755	58.3966
1364.55	99004.9	1654.01	96026	1661.48	0.0207905	0.540244	59.2538
1366.2	99151.8	1679.19	96130.5	1684.56	0.0210157	0.539768	60.2152
1367.85	99297.3	1681.59	96242.1	1704.17	0.0202705	0.54132	61.3939
1369.5	99447.6	1675.74	96332.3	1702.92	0.021002	0.541363	60.6213
1371.15	99592.7	1675.06	96528.1	1705.87	0.0219833	0.541384	61.8154
1372.8	99731.4	1683.7	96627.7	1694.53	0.02247	0.541691	61.0128
1374.45	99866.9	1697.63	96833.6	1670.66	0.021998	0.542002	60.2596
1376.1	100005	1703.77	97032.8	1669.23	0.022536	0.542047	61.15
1377.75	100140	1719.15	97145.9	1675.08	0.0231092	0.541936	61.0372
1379.4	100272	1738	97316.6	1649.04	0.0232142	0.542349	60.6034
1381.05	100403	1739.36	97495	1651.93	0.0234921	0.542575	61.0573
1382.7	100533	1729.55	97625.2	1661.96	0.0231368	0.542511	60.9337
1384.35	100664	1711.62	97790.4	1635.22	0.0236869	0.542434	60.1939
1386	100793	1706.88	97986.5	1655.26	0.0229687	0.54189	60.3794
1387.65	100925	1677.24	98131.5	1624.81	0.0227563	0.541297	60.1839
1389.3	101059	1651.29	98301.7	1623.38	0.0245591	0.540727	60.1734
1390.95	101183	1677.28	98454.4	1623.37	0.0255892	0.540947	60.0021
1392.6	101302	1683.55	98611.8	1606.31	0.0236232	0.540348	60.1273
1394.25	101432	1682.45	98756.3	1630.64	0.0232003	0.539205	60.6863
1395.9	101564	1687.26	98879.5	1645.72	0.0234055	0.539179	61.8887
1397.55	101694	1684.52	98971.2	1649.99	0.0229493	0.538168	62.9374
1399.2	101828	1683.34	99074.3	1662.29	0.023049	0.537394	63.9133
1400.85	101961	1684.16	99178.5	1685.02	0.0217834	0.536615	63.4465
1402.5	102102	1662.55	99352.3	1679.99	0.0224023	0.535352	63.1207
1404.15	102240	1656.09	99523.1	1672.37	0.0220072	0.534299	62.665
1405.8	102380	1656.93	99690.9	1678.85	0.0212958	0.533046	62.6098
1407.45	102526	1667.22	99836.2	1696.27	0.0211174	0.532529	61.9256
1409.1	102672	1682.48	100007	1703.85	0.0199579	0.53188	61.371
1410.75	102828	1685.35	100169	1722.43	0.0186473	0.530422	61.7731
1412.4	102995	1679.82	100291	1740.81	0.0183727	0.529239	62.7675
1414.05	103164	1682.06	100386	1739.88	0.0192293	0.528343	63.3697
1415.7	103327	1693.08	100495	1736.61	0.0196599	0.527331	63.459
1417.35	103486	1713.69	100627	1711.88	0.0194438	0.52646	64.0052
1419	103647	1737.17	100738	1711.1	0.01972	0.525843	64.573
1420.65	103806	1737.32	100848	1702.54	0.019779	0.525123	65.1305
1422.3	103965	1747.94	100962	1665.23	0.020723	0.524015	65.7318
1423.95	104117	1751.96	101075	1649.07	0.0207005	0.522946	66.136
1425.6	104269	1768.57	101188	1678.49	0.0211055	0.521574	66.4152
1427.25	104419	1788.71	101303	1683.58	0.019759	0.51941	65.8109
1428.9	104580	1790.2	101469	1682.13	0.0204062	0.517755	65.5909
1430.55	104736	1809.86	101618	1690.23	0.0206728	0.516432	65.2918
1432.2	104891	1792.35	101770	1678.86	0.0198456	0.514214	64.9748
1433.85	105052	1780.28	101928	1691.04	0.0211151	0.512145	65.7965
1435.5	105205	1757.85	102043	1667.27	0.021011	0.510366	65.9033
1437.15	105359	1724.62	102187	1655.86	0.0215449	0.508723	64.9551
1438.8	105509	1705.06	102377	1656.66	0.0220548	0.506709	64.4466
1440.45	105657	1694.18	102556	1669.38	0.0230974	0.504768	64.2107
1442.1	105799	1724.86	102728	1688.73	0.0212788	0.503027	62.3706
1443.75	105953	1735.71	102992	1679.78	0.0208883	0.501056	60.8531
1445.4	106110	1765.81	103249	1683.18	0.0205735	0.499151	59.7103
1447.05	106271	1781.14	103476	1712.04	0.020002	0.497213	60.0551
1448.7	106437	1781.26	103631	1737.56	0.0194827	0.495241	60.9194
1450.35	106608	1791.6	103761	1734.29	0.0196264	0.49321	60.1755
1452	106778	1822.06	103967	1748.07	0.0185276	0.491217	59.0374
1453.65	106960	1856.77	104182	1753.63	0.0178349	0.489302	58.079
1455.3	107149	1888.85	104386	1788.4	0.0171945	0.487409	57.3606
1456.95	107346	1893.55	104589	1790.28	0.0167647	0.485463	56.8156
1458.6	107548	1881.9	104780	1815.68	0.0170481	0.483444	56.5237
1460.25	107749	1878.67	104962	1777.4	0.0168439	0.481446	56.6436
1461.9	107952	1837.79	105125	1782.56	0.016823	0.479667	57.9596
1463.55	108157	1833.57	105228	1750.73	0.0176853	0.477966	57.4112
1465.2	108352	1805.15	105415	1713.52	0.0173949	0.476293	55.5858
1466.85	108551	1798.6	105650	1692.52	0.018155	0.474647	56.2582
1468.5	108742	1788.81	105773	1722.81	0.0176732	0.472996	57.0385
1470.15	108940	1775.68	105899	1732.78	0.01811	0.471406	58.0438
1471.8	109133	1758.7	106018	1739.28	0.0180276	0.469953	60.1001
1473.45	109328	1743.75	106092	1761.7	0.0180327	0.468524	62.3968
1475.1	109523	1735.37	106156	1775.86	0.0177161	0.467019	62.1645
1476.75	109723	1728.2	106338	1784.22	0.0179735	0.465871	61.7644
1478.4	109920	1723.69	106533	1778.38	0.0176763	0.464568	61.2924
1480.05	110121	1721.66	106735	1813.9	0.0172822	0.46335	61.4575
1481.7	110327	1722.06	106913	1847.06	0.0172447	0.462131	61.9371
1483.35	110534	1724.65	107083	1882.34	0.0170659	0.460999	62.3082
1485	110743	1729.58	107265	1900.39	0.0169681	0.459306	62.0933
1486.65	110955	1735.66	107491	1881.22	0.0167945	0.457669	61.7629
1488.3	111170	1736.53	107722	1883.96	0.0167631	0.455845	61.4341
1489.95	111386	1727.02	107958	1836.65	0.0174198	0.45417	61.2358
1491.6	111594	1730.76	108185	1833.14	0.0181271	0.452555	61.1925
1493.25	111795	1736.65	108395	1797.92	0.017199	0.450954	60.8332
1494.9	112008	1723.78	108623	1798.92	0.0175224	0.449398	60.6116
1496.55	112218	1719.9	108839	1780.63	0.0184727	0.448035	61.0513
1498.2	112417	1722.34	109021	1771.66	0.0177163	0.446797	61.0919
1499.85	112625	1713.17	109222	1748.37	0.0181546	0.445751	59.6006
1501.5	112829	1699.45	109503	1736.08	0.0195118	0.444659	59.0199
1503.15	113020	1695.82	109741	1727.52	0.0198202	0.443593	60.2055
1504.8	113207	1697.36	109883	1724.21	0.020572	0.442688	60.9507
1506.45	113388	1698.79	110050	1721.86	0.0201272	0.441826	61.1554
1508.1	113574	1699.25	110249	1721.29	0.0203966	0.440967	60.6321
1509.75	113757	1682.69	110491	1723.69	0.0204038	0.440399	60.2424
1511.4	113941	1685.69	110727	1729.06	0.022272	0.440233	60.5075
1513.05	114109	1678.44	110925	1735.21	0.0216474	0.440839	60.6037
1514.7	114282	1675.89	111129	1738.19	0.02251	0.440783	61.0061
1516.35	114448	1678.89	111321	1730.42	0.0225952	0.440196	61.6582
1518	114614	1678.19	111500	1720.95	0.022071	0.439541	62.1529
1519.65	114784	1680.22	111683	1740.08	0.0226766	0.438813	62.2066
1521.3	114950	1679.23	111892	1733.68	0.0227622	0.438091	62.1567
1522.95	115116	1677.27	112112	1714.87	0.02285	0.437487	61.9467
1524.6	115281	1676.84	112332	1725.38	0.0230505	0.436782	61.2229
1526.25	115445	1668.64	112582	1716.42	0.0232891	0.43616	60.9851
1527.9	115607	1670.8	112805	1699.66	0.0248974	0.435525	62.0832
1529.55	115759	1663.44	112946	1698.45	0.0243889	0.434865	62.6803
1531.2	115915	1658.05	113110	1692.6	0.0250836	0.434115	63.2804
1532.85	116066	1653.63	113271	1700.46	0.0255667	0.433369	63.6361
1534.5	116215	1650.79	113441	1698.04	0.025525	0.432652	63.9059
1536.15	116365	1652.65	113619	1699.65	0.0266609	0.431884	64.4047
1537.8	116508	1660.05	113783	1679.5	0.0273748	0.431079	64.6426
1539.45	116648	1657.44	113960	1686.43	0.0264893	0.430202	64.6385
1541.1	116793	1656.47	114135	1677.08	0.0274003	0.429448	64.8957
1542.75	116933	1657.34	114300	1675.74	0.027355	0.428611	64.8075
1544.4	117074	1651.84	114476	1679.48	0.0270838	0.427896	64.3393
1546.05	117216	1649.97	114668	1677.7	0.0291247	0.427059	65.0737
1547.7	117349	1655.51	114811	1680.79	0.0283499	0.426119	65.6974
1549.35	117485	1654.51	114956	1679.16	0.027187	0.425141	65.0324
1551	117628	1657.44	115156	1676.8	0.0287535	0.42423	64.9492
1552.65	117763	1658.42	115330	1676.85	0.0274959	0.423235	65.3078
1554.3	117905	1655.61	115485	1665.76	0.0279489	0.422364	65.9955
1555.95	118045	1652.87	115623	1671.47	0.0284296	0.421506	66.4082
1557.6	118182	1651.51	115765	1663.12	0.0300231	0.420686	65.2327
1559.25	118313	1652.57	115971	1656.17	0.0290847	0.419853	63.6313
1560.9	118448	1654.76	116187	1650.43	0.0286259	0.418934	62.628
1562.55	118586	1654.57	116379	1652.83	0.0283119	0.418039	64.0948
1564.2	118725	1653.46	116474	1655.66	0.0292003	0.41718	66.716
1565.85	118861	1651.63	116526	1662.42	0.0297842	0.416321	66.9309
1567.5	118994	1650.1	116664	1656.77	0.0310209	0.415206	66.8413
1569.15	119122	1656.97	116818	1656.41	0.0292868	0.414117	66.4008
1570.8	119258	1656.81	116980	1657.72	0.0290481	0.413015	66.1429
1572.45	119395	1654.34	117137	1647.87	0.0302025	0.411789	66.0626
1574.1	119528	1649.63	117284	1651.78	0.0315998	0.411119	66.6085
1575.75	119655	1655.82	117404	1658.69	0.0301887	0.410389	66.9203
1577.4	119788	1659.33	117536	1651.91	0.0299595	0.409459	67.3418
1579.05	119923	1661.33	117667	1659.79	0.0300086	0.408254	67.0654
1580.7	120057	1658	117821	1657.6	0.0310652	0.406867	66.4793
1582.35	120188	1657.48	117990	1653.61	0.0312956	0.405779	65.7422
1584	120318	1655.92	118159	1651.32	0.0321058	0.404709	65.0828
1585.65	120445	1659.4	118318	1652.61	0.0314327	0.403792	64.2586
1587.3	120575	1660.27	118486	1655.38	0.0308527	0.402988	64.4093
1588.95	120708	1656.77	118623	1654.27	0.0318442	0.402429	65.2683
1590.6	120836	1656.09	118736	1653.37	0.0328503	0.402707	66.0851
1592.25	120961	1660.27	118843	1652.26	0.0322719	0.402606	66.5123
1593.9	121088	1667.45	118963	1647.97	0.0316836	0.402436	66.5758
1595.55	121218	1672.7	119091	1656.92	0.0306866	0.401951	66.2862
1597.2	121351	1672.3	119238	1657.14	0.0305392	0.402181	65.8884
1598.85	121486	1670	119387	1654.69	0.0307946	0.401533	66.0191
1600.5	121619	1666.04	119519	1649.2	0.0329788	0.401516	65.8887
1602.15	121744	1672.25	119651	1655.71	0.0320381	0.401721	64.8832
1603.8	121872	1673.05	119816	1660.04	0.0318919	0.400709	65.0491
1605.45	122001	1670.48	119950	1661.66	0.0325961	0.400339	65.9668
1607.1	122127	1669.84	120057	1658	0.0328882	0.4004	66.1355
1608.75	122253	1672.36	120182	1657.59	0.0331711	0.400529	66.3712
1610.4	122377	1677.77	120303	1655.49	0.0328193	0.400716	67.101
1612.05	122502	1676.01	120407	1658.57	0.0317038	0.400776	67.0216
1613.7	122632	1679.39	120539	1661.46	0.0326511	0.400803	67.0834
1615.35	122758	1677.65	120668	1657.19	0.0319433	0.400657	66.4355
1617	122887	1678.89	120819	1655.58	0.0328351	0.400171	66.5303
1618.65	123013	1676.4	120944	1659.36	0.0324551	0.400064	67.2252
1620.3	123140	1675.24	121050	1665.04	0.03412	0.399494	67.5614
1621.95	123261	1678.22	121171	1672.71	0.0341404	0.398623	67.1678
1623.6	123382	1681.34	121321	1672.68	0.0332516	0.398585	66.8489
1625.25	123507	1678.65	121466	1670.87	0.0330675	0.398628	66.7779
1626.9	123632	1673.73	121601	1664.95	0.0364465	0.398245	67.3529
1628.55	123746	1680.12	121712	1671.7	0.0360514	0.397582	67.5084
1630.2	123861	1696.08	121838	1673.85	0.034667	0.397369	67.4578
1631.85	123980	1695.96	121969	1670.75	0.0317999	0.397266	67.0163
1633.5	124111	1696.29	122110	1669.54	0.0321641	0.39721	66.8803
1635.15	124240	1694.81	122240	1671.82	0.0321845	0.396933	66.2733
1636.8	124369	1695.75	122384	1678.08	0.0338586	0.396417	66.2178
1638.45	124492	1707.99	122514	1675.81	0.0316907	0.395961	65.8026
1640.1	124624	1710.7	122659	1680.19	0.0320001	0.395423	65.5473
1641.75	124754	1706.95	122796	1676.7	0.0320476	0.395202	65.3312
1643.4	124884	1708.97	122931	1679.95	0.0333457	0.394776	65.4468
1645.05	125010	1714.73	123056	1674.5	0.032356	0.394271	65.1586
1646.7	125139	1727.76	123192	1675.7	0.031894	0.393796	64.8734
1648.35	125271	1737.31	123324	1680.51	0.0303904	0.393064	64.4819
1650	125409	1743.25	123462	1682.46	0.0322252	0.393142	64.5745
1651.65	125539	1754.01	123584	1672.12	0.0323236	0.393155	64.4866
1653.3	125669	1763.2	123704	1676.13	0.0318095	0.393065	65.5673
1654.95	125801	1776.32	123789	1684.33	0.0324113	0.392791	67.1113
1656.6	125930	1797.44	123864	1696.55	0.0298063	0.392428	66.6131
1658.25	126071	1786.55	124001	1695.86	0.032237	0.391971	66.2492
1659.9	126202	1771.69	124145	1696.43	0.0337675	0.391471	65.6298
1661.55	126327	1769.06	124296	1693.88	0.0354599	0.390731	66.4527
1663.2	126446	1770.34	124402	1696.57	0.036616	0.389858	67.9542
1664.85	126561	1778.21	124485	1707.85	0.0366578	0.389188	67.8528
1666.5	126677	1782.09	124623	1710.71	0.0349529	0.388582	67.4918
1668.15	126799	1783.96	124768	1706.56	0.0354752	0.388097	67.376
1669.8	126918	1792.98	124904	1709.37	0.0341708	0.387622	66.2131
1671.45	127043	1778.38	125067	1717.63	0.0366994	0.386908	66.102
1673.1	127159	1775.38	125205	1737.02	0.0359047	0.386013	66.6771
1674.75	127278	1755.89	125326	1737.55	0.0355646	0.385205	67.0379
1676.4	127399	1747.2	125454	1746.38	0.0389585	0.384139	66.199
1678.05	127509	1746.53	125615	1760.88	0.0395099	0.383068	65.9683
1679.7	127618	1745.03	125759	1767.12	0.0393202	0.382094	65.6271
1681.35	127728	1747.39	125905	1799.31	0.0382175	0.381301	65.3423
1683	127841	1742.38	126057	1788.16	0.0383254	0.380348	65.1157
1684.65	127954	1731.74	126201	1771.72	0.0410909	0.379303	64.0836
1686.3	128060	1727.84	126359	1768.39	0.0412326	0.378482	63.6901
1687.95	128166	1725.9	126491	1771.35	0.0418139	0.378002	63.641
1689.6	128270	1726.43	126610	1782.94	0.0406749	0.377587	63.3155
1691.25	128378	1722.68	126739	1781.3	0.039961	0.377159	63.8409
1692.9	128487	1721.4	126847	1786.15	0.0398485	0.376844	66.0256
1694.55	128597	1722.2	126909	1794.17	0.0385874	0.376282	66.1066
1696.2	128711	1723.89	127034	1778.62	0.0395514	0.375651	65.6416
1697.85	128822	1725.18	127166	1775.21	0.0392944	0.375322	65.0647
1699.5	128934	1730.55	127302	1751.76	0.041445	0.374937	64.982
1701.15	129040	1736.43	127424	1745.98	0.0373393	0.37429	64.7618
1702.8	129158	1736.56	127543	1746.75	0.0400424	0.373776	65.7016
1704.45	129268	1743.08	127631	1744.74	0.0395668	0.37333	66.6826
1706.1	129380	1749.73	127718	1747.76	0.0389518	0.37304	66.8344
1707.75	129493	1752.66	127829	1743.56	0.0371865	0.372817	66.4151
1709.4	129612	1753.69	127953	1731.77	0.0390749	0.372588	66.3817
1711.05	129726	1760.55	128061	1727.8	0.0380251	0.372672	67.1648
1712.7	129842	1767.76	128148	1725.52	0.0374679	0.37258	68.4867
1714.35	129960	1773.62	128222	1727.08	0.0371555	0.372507	69.0721
1716	130079	1780.94	128314	1725.85	0.0372766	0.372598	69.2158
1717.65	130198	1793.28	128418	1720.67	0.0358749	0.372512	68.244
1719.3	130322	1802.83	128552	1722.09	0.0346695	0.372389	67.9571
1720.95	130450	1810.73	128672	1722.38	0.0342301	0.372891	68.2788
1722.6	130579	1821.38	128774	1726.38	0.0332351	0.373588	68.4319
1724.25	130712	1828.19	128878	1723.77	0.0316421	0.374221	68.1394
1725.9	130851	1836.3	128992	1737.67	0.0320621	0.374959	67.3527
1727.55	130988	1846.61	129122	1734.32	0.0315748	0.375767	67.5872
1729.2	131127	1857.2	129225	1740.71	0.0314854	0.376662	68.3287
1730.85	131266	1879.23	129313	1745.54	0.0311418	0.377515	67.7169
1732.5	131407	1910.02	129437	1753.34	0.0277982	0.378429	66.66
1734.15	131564	1936.5	129578	1751.64	0.0276778	0.379274	66.2217
1735.8	131721	1965.85	129700	1758.94	0.0267599	0.380245	66.2698
1737.45	131883	1969.93	129810	1765.97	0.0254398	0.381141	66.4974
1739.1	132053	1984.57	129918	1772.05	0.0271397	0.382039	66.4762
1740.75	132212	2015.77	130033	1776.3	0.0256992	0.382961	66.298
1742.4	132380	2043.98	130152	1788.16	0.0249944	0.383762	67.0372
1744.05	132552	2084.28	130249	1798.89	0.0237348	0.384491	67.0778
1745.7	132733	2121.15	130369	1805.38	0.0231871	0.385415	66.7649
1747.35	132917	2144.98	130502	1814.21	0.0228748	0.386366	66.6122
1749	133104	2122.04	130632	1826.35	0.022303	0.387127	66.4139
1750.65	133295	2162.43	130770	1829.54	0.0237444	0.387731	66.4627
1752.3	133474	2169.69	130903	1840.67	0.0213639	0.388202	65.8461
1753.95	133673	2172.29	131059	1851.57	0.0218903	0.388497	65.7605
1755.6	133867	2196.89	131199	1863.11	0.020927	0.388612	64.8937
1757.25	134070	2226.02	131367	1903.31	0.0203318	0.388035	63.8674
1758.9	134279	2265.76	131561	1935.92	0.0199263	0.38735	62.8109
1760.55	134493	2309.36	131762	1973.56	0.0192764	0.386578	61.8539
1762.2	134715	2377.03	131970	1967.32	0.0180328	0.385784	60.8547
1763.85	134952	2422.2	132176	2009.89	0.0167715	0.385224	60.3435
1765.5	135207	2412.34	132365	2040.5	0.0167485	0.384564	60.2191
1767.15	135463	2431.58	132546	2083	0.016926	0.383805	60.6221
1768.8	135717	2494.16	132715	2118.78	0.0158816	0.383011	60.2221
1770.45	135989	2550.14	132921	2145.49	0.0145717	0.382266	59.4666
1772.1	136285	2527.41	133147	2116.58	0.0150401	0.381521	59.0265
1773.75	136572	2520.82	133358	2181.89	0.0147084	0.380758	58.5209
1775.4	136867	2550.51	133573	2159.34	0.0148251	0.379961	58.1652
1777.05	137160	2570.03	133791	2187.45	0.0143679	0.379146	58.0253
1778.7	137463	2589.95	134003	2213.57	0.0141699	0.378289	58.0101
1780.35	137771	2618.09	134217	2252.97	0.0137269	0.377452	56.3742
1782	138089	2688.86	134516	2314.05	0.0134027	0.376628	55.161
1783.65	138416	2736.91	134812	2407.82	0.0123913	0.375835	55.3787
1785.3	138770	2735.07	135050	2432.3	0.0124417	0.375004	55.9212
1786.95	139124	2757.68	135282	2402.86	0.0125836	0.374205	54.9991
1788.6	139474	2768.77	135597	2452.71	0.0122653	0.373452	54.3983
1790.25	139835	2755.34	135904	2558.5	0.012279	0.372555	54.4312
1791.9	140195	2770.43	136199	2529.39	0.0124451	0.371693	52.5623
1793.55	140552	2810.44	136619	2519.74	0.0119113	0.370787	51.8551
1795.2	140926	2812.86	136969	2563.15	0.0118827	0.369876	51.9228
1796.85	141301	2789.1	137269	2573.96	0.011901	0.36889	51.9206
1798.5	141677	2800.28	137584	2599.91	0.0126395	0.368043	52.0593
1800.15	142031	2854.44	137894	2630.09	0.0123724	0.367046	51.9813
1801.8	142395	2800.69	138232	2731.89	0.0118311	0.366254	51.8666
1803.45	142776	2748.06	138589	2741.61	0.0128698	0.365335	52.1309
1805.1	143127	2742.56	138932	2729.25	0.012228	0.364724	52.3541
1806.75	143497	2775.44	139274	2779.88	0.0128688	0.363889	52.563
1808.4	143849	2851.61	139621	2760.63	0.0124234	0.363148	51.4231
1810.05	144215	2868.79	140081	2749.24	0.0125356	0.362444	51.6489
1811.7	144578	2861.74	140429	2813.61	0.0133007	0.361938	52.6095
1813.35	144920	2886.58	140724	2806.02	0.0131843	0.361244	52.7784
1815	145267	2912.38	141093	2818.53	0.0131878	0.360453	53.0063
1816.65	145614	2961.49	141459	2766.79	0.0135803	0.359984	53.4535
1818.3	145952	3065.03	141797	2818.71	0.0128933	0.359083	53.074
1819.95	146308	3076.16	142195	2879.3	0.013337	0.358453	53.0512
1821.6	146653	3075.45	142576	2729.58	0.0136589	0.357686	53.0071
1823.25	146991	3115.99	142954	2764.57	0.0149329	0.357302	53.2159
1824.9	147300	3129.16	143303	2720.05	0.0142809	0.356579	52.9818
1826.55	147624	3224.27	143690	2830.86	0.0138868	0.355922	52.9156
1828.2	147958	3340.52	144063	2879.64	0.013143	0.355689	52.7934
1829.85	148311	3352.66	144440	2852.69	0.0140176	0.355152	53.3911
1831.5	148642	3395.94	144752	2873.13	0.0145932	0.35482	53.3814
1833.15	148961	3445.98	145101	2900.97	0.0144583	0.354121	52.4573
1834.8	149283	3467.54	145524	2930.07	0.0139526	0.353735	51.958
1836.45	149618	3508.58	145905	3063.31	0.0138658	0.353338	51.9826
1838.1	149954	3505.73	146261	3076.43	0.0140602	0.352746	51.5957
1839.75	150287	3521.37	146643	3074.19	0.0152139	0.352158	51.4663
1841.4	150595	3557.26	146996	3116.57	0.0155526	0.351882	50.4977
1843.05	150896	3583.51	147375	3132.25	0.0155063	0.351121	52.3058
1844.7	151200	3664.81	147582	3208.91	0.0149343	0.350693	51.9444
1846.35	151515	3703.95	147944	3340.45	0.0148172	0.350058	52.9707
1848	151833	3719.64	148227	3341.94	0.0148739	0.349404	52.4342
1849.65	152150	3739.24	148608	3390.55	0.0147939	0.348844	50.8803
1851.3	152470	3786.03	149039	3458.27	0.0145688	0.348427	51.4277
1852.95	152795	3782.62	149330	3469.32	0.0144626	0.347815	52.9397
1854.6	153123	3801.53	149564	3509.45	0.0148663	0.346938	52.9088
1856.25	153443	3817.84	149912	3503.75	0.0149197	0.34628	51.8366
1857.9	153762	3875.75	150324	3523.13	0.0149473	0.345643	52.0226
1859.55	154082	3844.45	150626	3561.15	0.0138719	0.345042	52.0113
1861.2	154426	3885.87	150934	3586.6	0.0142556	0.34436	53.3189
1862.85	154762	3847.06	151161	3658.96	0.0130739	0.343682	54.0465
1864.5	155130	3832.62	151433	3700.12	0.0137508	0.343069	54.0255
1866.15	155479	3802.28	151759	3715.48	0.012818	0.342576	53.2753
1867.8	155855	3754.74	152131	3736.39	0.0128692	0.341967	53.0805
1869.45	156230	3710.88	152470	3786.04	0.0130697	0.341465	53.1514
1871.1	156600	3701.49	152795	3782.62	0.0133935	0.340916	53.0622
1872.75	156961	3734.69	153135	3802.2	0.0119968	0.340342	52.7314
1874.4	157365	3722.6	153482	3819.83	0.0124426	0.339782	52.7709
1876.05	157756	3707.38	153805	3884.23	0.0128054	0.339232	53.2748
1877.7	158135	3681.49	154098	3842.13	0.012758	0.338585	52.7081
1879.35	158517	3703.3	154488	3894.12	0.0131819	0.337994	52.2183
1881	158888	3711.2	154874	3827.95	0.0131924	0.337303	52.0134
1882.65	159259	3605.1	155258	3834.96	0.015232	0.336703	51.7366
1884.3	159580	3589.96	155646	3777.73	0.0147573	0.33599	51.0052
1885.95	159913	3493.62	156085	3729.49	0.0157375	0.335376	51.1811
1887.6	160226	3441.99	156451	3682.53	0.0163116	0.334822	50.3447
1889.25	160528	3449.1	156883	3737.55	0.0162702	0.334268	50.587
1890.9	160831	3480.21	157265	3723.54	0.0152133	0.3336	50.8042
1892.55	161156	3499.02	157650	3719.92	0.0151066	0.332984	50.9664
1894.2	161484	3504.06	158027	3675.3	0.0142743	0.332344	48.6413
1895.85	161832	3522.38	158592	3707.59	0.0143356	0.331677	50.0178
1897.5	162179	3524.01	158868	3717.94	0.0137653	0.330959	50.6556
1899.15	162541	3455.21	159199	3607.21	0.0135657	0.330143	50.1763
1900.8	162910	3352.07	159567	3594.15	0.0149137	0.329577	51.3625
1902.45	163245	3285.32	159827	3508.96	0.0157826	0.328856	50.4859
1904.1	163563	3269.51	160206	3441.53	0.0159749	0.328124	49.8173
1905.75	163878	3251.08	160556	3449.77	0.0159459	0.327433	52.332
1907.4	164194	3220.81	160714	3480.92	0.0155516	0.326867	54.5719
1909.05	164519	3212.76	160893	3479.84	0.0151499	0.326223	54.6452
1910.7	164853	3177.13	161221	3503.7	0.0139783	0.325505	53.7599
1912.35	165215	3154.24	161621	3504.26	0.0136612	0.324825	53.4367
1914	165587	3106.29	161999	3536.72	0.0122209	0.324171	53.5073
1915.65	166003	3023.5	162356	3511.56	0.0127675	0.323678	52.7016
1917.3	166403	2963.18	162785	3381.21	0.0126165	0.322742	52.0887
1918.95	166808	2972.19	163182	3288.39	0.0129123	0.32224	51.3361
1920.6	167205	2993.71	163555	3270.28	0.0127042	0.321648	53.6209
1922.25	167608	3016.12	163736	3253.35	0.0125918	0.321091	54.8167
1923.9	168016	3003.04	163983	3249.41	0.0131914	0.320352	55.8826
1925.55	168407	3021.81	164243	3214.2	0.012566	0.319852	55.2779
1927.2	168817	3020.19	164614	3212.27	0.0136263	0.319536	55.1253
1928.85	169196	3081.41	164970	3159.82	0.0142839	0.31871	55.0178
1930.5	169559	3110.69	165354	3151.09	0.0137512	0.318199	53.3022
1932.15	169936	3012.82	165887	3048.61	0.0152423	0.317556	53.3747
1933.8	170277	2968.24	166294	2960.76	0.015064	0.3173	51.3923
1935.45	170622	2971.19	166854	2973.22	0.0144949	0.31678	52.4763
1937.1	170981	2972.48	167175	2992.01	0.0147622	0.316027	52.3159
1938.75	171335	3013.92	167600	3016.4	0.01446	0.31549	52.4043
1940.4	171697	3068.16	168008	3002.63	0.0139981	0.315018	52.6117
1942.05	172071	3113.76	168389	3021.88	0.0137367	0.314337	52.4337
1943.7	172453	3143.01	168822	3020.18	0.0130232	0.313764	52.3365
1945.35	172857	3124.72	169214	3084.24	0.013184	0.313154	51.9186
1947	173256	3033.71	169614	3114.92	0.012624	0.312806	53.2815
1948.65	173674	2893.3	169898	3018.89	0.0130743	0.312165	53.7307
1950.3	174079	2799.46	170220	2967.49	0.0151899	0.311674	53.2886
1951.95	174427	2793.83	170599	2972.55	0.0158984	0.31131	55.1287
1953.6	174760	2863.21	170837	2958.33	0.0152935	0.310754	54.897
1955.25	175108	2960.41	171215	2995.41	0.0141889	0.310136	53.9712
1956.9	175483	2867.08	171644	3061.7	0.0136144	0.309785	53.6468
1958.55	175874	2794.54	172044	3111.1	0.013802	0.309681	54.0935
1960.2	176260	2694.99	172395	3145.64	0.0131136	0.30936	53.3415
1961.85	176667	2605.7	172856	3124.82	0.0135866	0.308804	52.8436
1963.5	177060	2544.14	173302	3023.23	0.0139212	0.308752	51.8731
1965.15	177444	2495.79	173793	2851.85	0.0146376	0.308436	51.7253
1966.8	177809	2502.82	174194	2778.3	0.0144915	0.308145	50.7125
1968.45	178179	2552.88	174603	2805.58	0.0146376	0.30788	51.3216
1970.1	178545	2643.58	174908	2917.23	0.0133825	0.307475	53.1866
1971.75	178946	2666.81	175141	2967.59	0.0139673	0.307084	53.3815
1973.4	179331	2637.92	175508	2859.59	0.0145567	0.306733	52.2965
1975.05	179700	2568.89	175981	2775.44	0.0161588	0.3063	51.1824
1976.7	180033	2533.57	176463	2636.43	0.017578	0.305893	50.167
1978.35	180340	2570.98	176942	2564.23	0.0168958	0.305321	49.9248
1980	180660	2561.9	177352	2494.42	0.0188239	0.305135	49.4742
1981.65	180947	2574.18	177755	2500.45	0.0182287	0.30488	50.3477
1983.3	181244	2610.88	178067	2513.99	0.0177985	0.304624	50.8593
1984.95	181549	2666.24	178402	2630.51	0.0170629	0.304411	51.2298
1986.6	181866	2698.75	178765	2663.75	0.0157425	0.304127	51.0977
1988.25	182211	2665.86	179170	2670.59	0.0149942	0.303822	50.4084
1989.9	182573	2628.72	179596	2584.05	0.0158896	0.303492	49.6215
1991.55	182915	2639.23	179991	2526.55	0.0158047	0.303027	49.8921
1993.2	183260	2692.08	180290	2576.12	0.0149975	0.302583	50.9767
1994.85	183623	2656.24	180549	2549.54	0.0154574	0.302116	53.714
1996.5	183977	2643.35	180708	2567.16	0.0154798	0.301619	53.0897
1998.15	184330	2654.26	181035	2576.74	0.015089	0.301086	52.6091
1999.8	184693	2639.54	181366	2630.75	0.0147763	0.300647	53.789
2001.45	185065	2595.12	181612	2678.53	0.0154196	0.300256	52.8039
2003.1	185421	2592.07	182001	2709.46	0.015145	0.299932	52.5206
2004.75	185784	2561.44	182375	2631.77	0.0149507	0.299857	50.8579
2006.4	186152	2522.28	182832	2624.74	0.01464	0.299784	49.9502
2008.05	186528	2494.53	183234	2694.91	0.0148014	0.299553	51.3308
2009.7	186900	2460.37	183507	2665.1	0.0145018	0.29937	51.5202
2011.35	187281	2469.6	183854	2638.64	0.0151428	0.298977	50.952
2013	187645	2508.36	184248	2653.77	0.0152968	0.2985	51.3863
2014.65	188006	2551.68	184586	2655.78	0.0152108	0.297981	50.9748
2016.3	188370	2556.26	184988	2595.03	0.0157603	0.297392	50.6403
2017.95	188722	2526.42	185376	2595.5	0.0171577	0.296669	51.3992
2019.6	189047	2541.92	185697	2571.29	0.0170474	0.295978	51.0067
2021.25	189374	2540.47	186097	2526.33	0.018363	0.295194	50.3993
2022.9	189678	2534.74	186522	2495.1	0.0193674	0.294451	50.278
2024.55	189967	2534.61	186911	2459.4	0.0214846	0.293833	50.855
2026.2	190229	2504.95	187259	2467.32	0.0195884	0.293213	50.6405
2027.85	190516	2460.56	187645	2508.39	0.0182033	0.29236	50.3992
2029.5	190826	2424.94	188032	2554.73	0.0175013	0.291685	51.4055
2031.15	191149	2423.47	188339	2559.17	0.0183412	0.290769	51.3324
2032.8	191459	2444.46	188706	2525.6	0.0172196	0.289923	51.5271
2034.45	191789	2455.8	189029	2542.04	0.0167388	0.288914	52.1793
2036.1	192130	2457.83	189329	2539.84	0.0169863	0.287927	53.4396
2037.75	192468	2447.79	189579	2543.4	0.0154699	0.286986	54.0063
2039.4	192839	2345.6	189853	2519.4	0.0159048	0.286151	55.8103
2041.05	193202	2295.18	190051	2545.83	0.0164511	0.285234	57.3761
2042.7	193553	2259.52	190252	2499.56	0.0174129	0.284317	58.6295
2044.35	193887	2168.29	190486	2463.95	0.0194685	0.283664	56.0031
2046	194186	2155.41	190946	2411.12	0.0188461	0.282852	54.9054
2047.65	194495	2131.72	191331	2434.55	0.0170822	0.281884	55.1685
2049.3	194838	2117.21	191649	2459.23	0.0173988	0.281087	54.6874
2050.95	195175	2118.23	192022	2450.1	0.0159106	0.280365	54.5671
2052.6	195545	2056.63	192376	2475.42	0.0162173	0.279546	54.0787
2054.25	195909	2020.53	192779	2353.98	0.0160533	0.278723	52.5903
2055.9	196278	1990.76	193243	2289.49	0.0166716	0.277957	53.2014
2057.55	196634	1967.95	193566	2258.31	0.0169788	0.277044	53.7677
2059.2	196985	1963.22	193877	2168.83	0.0180955	0.276273	54.5126
2060.85	197315	1953.7	194147	2153.19	0.0192994	0.275488	56.9929
2062.5	197625	1966.55	194335	2164.15	0.0182464	0.27466	58.0831
2064.15	197954	1960.71	194609	2108.65	0.0191629	0.273844	55.133
2065.8	198269	1964.22	195124	2127.91	0.0192552	0.273101	55.9849
2067.45	198582	1963.86	195446	2066.4	0.0193301	0.272317	54.17
2069.1	198896	1960.53	195931	2018.34	0.0205888	0.271558	54.1568
2070.75	199191	1965.35	196309	1988.3	0.0208563	0.270762	54.6911
2072.4	199483	1963.99	196643	1967.4	0.0222976	0.269796	54.7433
2074.05	199757	1970.16	197001	1963.02	0.0222968	0.26889	55.3824
2075.7	200033	1973.11	197306	1953.21	0.0225181	0.268012	56.7125
2077.35	200306	1971.17	197559	1968.26	0.0232879	0.267187	56.9315
2079	200571	1976.72	197882	1959.85	0.0239754	0.266354	57.3662
2080.65	200830	1982.35	198187	1963.5	0.0234435	0.265529	57.9574
2082.3	201095	1986.49	198480	1966.06	0.023561	0.264706	57.4623
2083.95	201359	1988	198827	1958.6	0.0233748	0.263917	57.728
2085.6	201627	1991.58	199122	1966.92	0.024394	0.263067	58.8518
2087.25	201884	2012.04	199371	1961.24	0.0243169	0.262233	59.7586
2088.9	202143	2032.02	199621	1967.39	0.0230527	0.261329	59.7336
2090.55	202416	2038.11	199906	1973.18	0.0238487	0.260464	60.4597
2092.2	202682	2046.26	200157	1973.03	0.0239164	0.259694	61.0852
2093.85	202948	2050.52	200408	1969.88	0.0237497	0.258918	60.1864
2095.5	203216	2046.9	200715	1982.75	0.0241404	0.258189	61.7366
2097.15	203481	2049.01	200920	1982.03	0.0235445	0.257557	60.736
2098.8	203753	2053.61	201232	1990	0.0220606	0.256879	61.2649
2100.45	204044	2055.96	201483	1986.07	0.0206685	0.256236	61.1862
2102.1	204356	2064.49	201755	1996.49	0.0206012	0.255686	60.7145
2103.75	204669	2085.33	202037	2030.49	0.0198533	0.255174	61.7301
2105.4	204995	2093.13	202267	2033.81	0.018937	0.254723	60.7644
2107.05	205337	2093.65	202581	2042.83	0.0189141	0.254324	60.4532
2108.7	205680	2106.65	202863	2052.39	0.0192179	0.254021	61.1337
2110.35	206018	2115.38	203106	2047.03	0.0189892	0.253664	60.8298
2112	206360	2127.63	203388	2046.7	0.0202503	0.253328	60.7911
2113.65	206682	2137.56	203662	2053.49	0.0200228	0.253038	60.6666
2115.3	207007	2144.43	203956	2053.88	0.0213274	0.252798	59.3228
2116.95	207314	2161.84	204328	2062.65	0.021849	0.252612	58.0476
2118.6	207612	2155.59	204706	2087.78	0.0217288	0.252249	57.9009
2120.25	207914	2185.89	205045	2094.06	0.0214385	0.251974	57.1455
2121.9	208219	2194.85	205430	2093.52	0.0223585	0.251819	56.158
2123.55	208512	2186.62	205825	2114.29	0.0225192	0.251754	56.2901
2125.2	208803	2203.32	206159	2116.17	0.0219569	0.251611	56.4638
2126.85	209102	2209.93	206486	2134.75	0.0223756	0.251592	56.4096
2128.5	209395	2221.25	206812	2139.42	0.0223434	0.251517	57.7592
2130.15	209688	2214.56	207067	2145.97	0.024018	0.251433	57.3172
2131.8	209962	2230.02	207393	2166.96	0.0232829	0.251403	58.7584
2133.45	210244	2235.86	207627	2154.85	0.0234417	0.251335	59.1656
2135.1	210524	2237.09	207910	2185.78	0.0242358	0.25125	58.9163
2136.75	210795	2240.47	208227	2195.1	0.0243622	0.251197	58.7375
2138.4	211064	2242.88	208529	2186.12	0.0246762	0.251119	59.5867
2140.05	211330	2247.51	208783	2202.91	0.0244499	0.251032	59.8645
2141.7	211599	2248.96	209070	2208.66	0.0246889	0.250946	59.2494
2143.35	211866	2245.48	209392	2221.34	0.0256496	0.250942	59.6515
2145	212122	2244.51	209667	2213.32	0.0272453	0.25086	59.5901
2146.65	212363	2252.73	209945	2229.56	0.0261779	0.250813	61.0473
2148.3	212615	2253.82	210165	2235.7	0.0248702	0.250734	60.4814
2149.95	212879	2253.65	210470	2236.32	0.0261457	0.250683	60.6874
2151.6	213131	2256.66	210735	2240.17	0.0254367	0.250613	61.0709
2153.25	213390	2256.37	210990	2241.47	0.0253293	0.250461	61.4071
2154.9	213650	2257.59	211245	2246.33	0.0254829	0.250377	61.7652
2156.55	213909	2262.3	211499	2249.84	0.0250522	0.250473	61.476
2158.2	214172	2266.56	211777	2247.4	0.0245681	0.250329	61.7902
2159.85	214440	2265.93	212026	2241.99	0.0241573	0.250247	62.378
2161.5	214713	2263.19	212252	2247.93	0.0251568	0.250027	63.2807
2163.15	214975	2266.93	212467	2257.18	0.0251791	0.25003	62.9465
2164.8	215237	2273.4	212737	2251.04	0.0249434	0.249993	61.9704
2166.45	215502	2277.92	213033	2256.47	0.0236511	0.249752	62.6933
2168.1	215781	2270.85	213263	2256.91	0.0257666	0.249593	62.3236
2169.75	216038	2282.4	213539	2255.73	0.0247223	0.249317	62.2092
2171.4	216305	2283.37	213805	2260.19	0.0248408	0.249246	61.6686
2173.05	216572	2283.36	214089	2265.98	0.0256937	0.249001	62.0424
2174.7	216830	2288.17	214342	2267.77	0.0270656	0.248631	61.4969
2176.35	217075	2307.44	214640	2262.14	0.0272909	0.248325	61.2068
2178	217318	2331.72	214920	2266.15	0.0264126	0.247995	62.0767
2179.65	217570	2354.11	215151	2269.39	0.0255341	0.247559	62.0134
2181.3	217831	2385.96	215421	2281.93	0.0247359	0.24716	61.7517
2182.95	218101	2387.05	215711	2267.51	0.0234577	0.246681	60.6563
2184.6	218386	2424.59	216020	2282.29	0.0236887	0.246099	62.4267
2186.25	218669	2464.56	216222	2283.52	0.0220455	0.245484	61.5369
2187.9	218974	2488.41	216530	2282.98	0.0211074	0.244825	61.6963
2189.55	219294	2524.75	216790	2285.36	0.02126	0.244132	62.1644
2191.2	219611	2586.71	217026	2302.05	0.0204835	0.243416	62.8625
2192.85	219942	2654.4	217252	2327.07	0.0189179	0.242636	63.0571
2194.5	220302	2696.7	217502	2344.5	0.0191433	0.241868	62.2964
2196.15	220658	2748.13	217797	2385.82	0.0198772	0.241085	61.4118
2197.8	221003	2751.44	218109	2387.08	0.0190678	0.240322	60.5332
2199.45	221363	2878.61	218438	2431.6	0.0184876	0.239592	60.3683
2201.1	221735	2929.07	218741	2474.73	0.0179594	0.238906	59.2592
2202.75	222120	2964.25	219108	2496.26	0.0171645	0.238179	58.0958
2204.4	222523	3018.08	219489	2554.75	0.0167453	0.237441	58.1865
2206.05	222938	3039.11	219819	2640.7	0.0155957	0.23651	57.2339
2207.7	223386	3023.2	220229	2686.12	0.0156538	0.235613	55.9289
2209.35	223833	3006.18	220663	2748.8	0.015015	0.234589	56.0599
2211	224301	3014.7	221013	2751.52	0.0146996	0.233617	56.5706
2212.65	224782	3090.91	221359	2878.14	0.0148113	0.232801	56.1455
2214.3	225260	3124.58	221765	2933.15	0.0143425	0.231951	54.7759
2215.95	225756	3161.24	222241	2974.86	0.0147462	0.230913	54.4395
2217.6	226241	3195.55	222682	3042.28	0.0153555	0.229865	53.6233
2219.25	226708	3188.52	223175	3036.19	0.0158093	0.229012	52.8223
2220.9	227164	3156.68	223685	3004.73	0.017493	0.228075	51.0032
2222.55	227578	3079.25	224278	3010.54	0.0189545	0.227245	52.0948
2224.2	227961	3115.12	224698	3085	0.0178427	0.226384	50.9708
2225.85	228369	3171.99	225264	3124.82	0.0173124	0.225525	50.4637
2227.5	228792	3183	225806	3164.91	0.0155156	0.224729	50.6493
2229.15	229265	3096.23	226288	3198.9	0.0150774	0.223999	50.7155
2230.8	229754	3006.79	226761	3187.22	0.0144543	0.223218	51.6944
2232.45	230265	2908.44	227167	3156.48	0.0152353	0.222597	52.4343
2234.1	230752	2893.75	227547	3077.03	0.0180651	0.221995	54.4974
2235.75	231163	2881.41	227834	3097.81	0.0165346	0.221352	56.56
2237.4	231614	2788.07	228129	3138.01	0.0150022	0.220887	54.9429
2239.05	232112	2671.72	228642	3210.55	0.015359	0.220332	54.7749
2240.7	232599	2613.62	229116	3123.47	0.0162799	0.219746	52.2984
2242.35	233061	2575.45	229772	3003.52	0.0173514	0.219238	51.6665
2244	233494	2513.17	230331	2895.78	0.0170179	0.21869	50.9322
2245.65	233938	2444.82	230854	2893.25	0.0170968	0.218194	52.0194
2247.3	234380	2402.21	231218	2879.32	0.0178661	0.217707	55.3774
2248.95	234804	2367.2	231476	2821.57	0.0187109	0.217292	53.6865
2250.6	235210	2339.87	232077	2675.87	0.0186208	0.216829	51.7957
2252.25	235619	2310.55	232689	2602.99	0.0188213	0.216401	52.2942
2253.9	236024	2286.22	233122	2570.91	0.0207755	0.21595	53.5008
2255.55	236392	2273.07	233493	2513.33	0.0210529	0.215565	55.0475
2257.2	236755	2255.6	233853	2453.16	0.0206235	0.215231	54.6847
2258.85	237127	2241.07	234321	2407.21	0.0223247	0.214819	54.7593
2260.5	237471	2231.96	234749	2370.84	0.0227005	0.214529	55.3738
2262.15	237810	2224.69	235129	2345.65	0.022458	0.21429	56.6257
2263.8	238153	2215.1	235474	2321.03	0.0224243	0.213938	56.8053
2265.45	238497	2205.23	235876	2291.93	0.0225656	0.213657	56.8182
2267.1	238839	2200.17	236260	2277.09	0.0234671	0.213485	58.2313
2268.75	239168	2192.48	236561	2267.88	0.0229019	0.213173	58.9679
2270.4	239506	2185.39	236897	2246.64	0.0239432	0.212914	58.5777
2272.05	239830	2183.51	237279	2237.4	0.0242883	0.212615	59.9961
2273.7	240149	2182.35	237562	2229.38	0.0238717	0.21228	59.8287
2275.35	240475	2168.6	237914	2222.72	0.0238079	0.211869	60.3821
2277	240802	2165.47	238237	2212.4	0.0269004	0.211528	59.6212
2278.65	241092	2173.88	238619	2201.85	0.0261972	0.211042	60.2365
2280.3	241390	2172.12	238936	2199.42	0.0266728	0.210658	60.0848
2281.95	241684	2157.82	239279	2189.15	0.0279013	0.210156	60.3029
2283.6	241965	2143.17	239609	2183.68	0.0292187	0.209545	60.6173
2285.25	242235	2134.55	239926	2183.43	0.031116	0.208894	61.0281
2286.9	242489	2130.06	240238	2181.91	0.03166	0.208359	60.8853
2288.55	242739	2109.91	240577	2162.86	0.0366029	0.207748	60.7902
2290.2	242956	2104.33	240902	2166.63	0.0372355	0.207187	60.54
2291.85	243170	2097.47	241211	2178.42	0.0373127	0.206736	62.7212
2293.5	243384	2095.19	241432	2170.67	0.0374019	0.20626	62.934
2295.15	243598	2095.08	241721	2155.92	0.0361867	0.20568	63.0449
2296.8	243819	2097.69	242003	2141.18	0.0356002	0.204988	64.121
2298.45	244045	2103.3	242244	2134.31	0.0339605	0.204294	64.9932
2300.1	244283	2113.97	242477	2131.2	0.0327931	0.20356	66.4655
2301.75	244530	2138.85	242689	2111.03	0.0332894	0.202758	66.5989
2303.4	244775	2195.49	242916	2105.96	0.0304949	0.201931	69.5857
2305.05	245043	2273.79	243059	2100.09	0.0277189	0.200924	70.1558
2306.7	245339	2263.17	243268	2095.14	0.0251825	0.19998	70.3605
2308.35	245667	2263.36	243485	2095.24	0.0240937	0.199232	70.3407
2310	246010	2278.02	243710	2094.93	0.0228662	0.198598	69.5816
2311.65	246374	2327.36	243961	2101.26	0.0213227	0.197992	69.8308
2313.3	246765	2439.95	244193	2106.86	0.0200214	0.197495	68.1683
2314.95	247182	2549.58	244491	2130.34	0.0181087	0.196813	68.4554
2316.6	247645	2568.72	244734	2182.96	0.0160056	0.196184	67.7135
2318.25	248170	2551.6	245029	2274.28	0.0163628	0.195645	65.0964
2319.9	248686	2539.44	245431	2259.87	0.0170536	0.195237	62.5725
2321.55	249181	2578.37	245872	2266.4	0.0177595	0.194708	61.4469
2323.2	249658	2689.45	246282	2300.78	0.0170263	0.194328	60.4045
2324.85	250157	2766.74	246720	2428.23	0.0163258	0.193831	59.0202
2326.5	250679	2813.62	247213	2557.69	0.0151693	0.193428	57.7786
2328.15	251241	2831.71	247764	2571.76	0.0144334	0.193197	55.8048
2329.8	251833	2824.39	248410	2539.7	0.014251	0.192859	54.1798
2331.45	252433	2839.4	249016	2539.13	0.0146607	0.192492	56.1115
2333.1	253018	2966.69	249398	2629.91	0.0133754	0.192161	57.0332
2334.75	253660	2995.96	249837	2730.22	0.0132882	0.191794	57.3789
2336.4	254307	2960.82	250329	2786.39	0.0136625	0.191449	55.8277
2338.05	254938	2876.78	250972	2836.52	0.0134149	0.191237	54.6596
2339.7	255581	2873.53	251634	2824.67	0.0144045	0.190859	52.8469
2341.35	256181	2909.25	252365	2823.64	0.0135443	0.19056	52.6825
2343	256820	2836.52	252968	2963.88	0.0136378	0.190465	52.8689
2344.65	257456	2860.57	253594	2999.54	0.0130441	0.190109	52.0462
2346.3	258121	2844.29	254309	2960.7	0.0136764	0.190132	51.1301
2347.95	258756	2864.46	255007	2867.5	0.0137764	0.189942	51.9622
2349.6	259386	2798.11	255592	2873.65	0.0133823	0.189937	52.3322
2351.25	260035	2737.41	256167	2911.89	0.0139632	0.18994	54.4761
2352.9	260657	2757.71	256647	2824.13	0.0149321	0.189861	54.5062
2354.55	261239	2782.11	257283	2869.6	0.0138542	0.190022	55.3122
2356.2	261866	2763.24	257875	2838.66	0.0137966	0.190187	54.9724
2357.85	262495	2697.54	258542	2853.93	0.0137825	0.190391	56.2899
2359.5	263124	2682.02	259074	2880.17	0.0148033	0.190538	56.9748
2361.15	263709	2761.97	259659	2726.34	0.0157354	0.190105	54.2972
2362.8	264260	2844.48	260498	2751.04	0.0150181	0.189533	52.1472
2364.45	264840	2914.75	261246	2782.37	0.0160376	0.189074	51.1824
2366.1	265384	2961.4	261951	2760.62	0.0165965	0.189006	49.677
2367.75	265910	2976.23	262690	2674.96	0.0183994	0.188915	49.1144
2369.4	266385	3097.93	263344	2685.61	0.0175626	0.188842	48.9917
2371.05	266882	3170.04	263925	2807.36	0.0172548	0.188852	49.2675
2372.7	267389	3226.72	264470	2867.67	0.0166	0.188844	51.1064
2374.35	267915	3290.64	264922	2925.18	0.0164174	0.188915	50.5049
2376	268447	3388.15	265499	2970.37	0.0150187	0.18888	52.1142
2377.65	269029	3439.09	265926	2976.47	0.0158152	0.188872	52.9724
2379.3	269581	3468.13	266355	3093.1	0.0148372	0.188723	55.1928
2380.95	270170	3497.99	266727	3152.55	0.0154103	0.188583	54.2314
2382.6	270738	3526.49	267288	3215.65	0.0150592	0.188282	53.8336
2384.25	271320	3516.57	267840	3276.43	0.0147342	0.188044	53.1291
2385.9	271916	3503.41	268418	3385.59	0.0149357	0.187979	52.3295
2387.55	272503	3502.89	269050	3440.95	0.0146403	0.187872	50.8639
2389.2	273103	3459.32	269704	3474.42	0.01435	0.187798	51.6063
2390.85	273715	3404.31	270242	3501.61	0.0141942	0.187565	50.8919
2392.5	274335	3374.37	270863	3532.76	0.0142806	0.187539	51.1599
2394.15	274951	3314.67	271430	3512.67	0.0144612	0.187516	50.6985
2395.8	275560	3234.47	272056	3500.74	0.0146289	0.187203	50.3939
2397.45	276162	3173.2	272673	3503.71	0.0147079	0.187332	50.766
2399.1	276761	3103.79	273248	3444.39	0.0152544	0.186824	49.7479
2400.75	277340	2993.87	273943	3384.8	0.014928	0.186853	49.615
2402.4	277932	2835.17	274570	3368.12	0.0144357	0.186698	49.6491
2404.05	278544	2844.82	275184	3282.07	0.0156394	0.186619	49.7667
2405.7	279109	2823.4	275783	3206.15	0.0144476	0.186386	49.8744
2407.35	279722	2744.3	276382	3154.13	0.0148978	0.186304	50.5311
2409	280316	2663.59	276932	3081.18	0.0151684	0.186107	50.6488
2410.65	280901	2640.14	277510	2957.56	0.0173392	0.186048	51.7733
2412.3	281412	2679.73	278031	2806.35	0.0163981	0.185751	50.8863
2413.95	281954	2723.76	278697	2856.33	0.015391	0.185557	51.2733
2415.6	282532	2722.37	279252	2811.95	0.0162583	0.185392	52.5651
2417.25	283079	2714.03	279778	2736.26	0.0166783	0.185202	51.819
2418.9	283613	2696.49	280424	2649.11	0.0171043	0.184784	51.9862
2420.55	284135	2685	280992	2638.43	0.0173738	0.184347	53.7378
2422.2	284651	2685.51	281410	2679.54	0.0176	0.183751	55.0521
2423.85	285161	2654.65	281883	2723.93	0.0176387	0.183506	53.4535
2425.5	285671	2633.45	282562	2722.29	0.017528	0.182743	52.9843
2427.15	286186	2637.76	283150	2712.9	0.0181551	0.182031	53.8812
2428.8	286685	2610.66	283643	2695.46	0.0189062	0.181316	54.3675
2430.45	287166	2583.29	284149	2684.72	0.0186172	0.18088	55.0059
2432.1	287656	2561.79	284635	2686.44	0.0188978	0.180359	54.8763
2433.75	288140	2560.98	285162	2654.6	0.0200649	0.180114	55.2925
2435.4	288597	2596.63	285652	2633.3	0.0195578	0.179407	54.9471
2437.05	289067	2632.15	286198	2637.87	0.0197967	0.178876	55.7924
2438.7	289533	2621.49	286661	2612.05	0.0198992	0.177966	56.1515
2440.35	289999	2663.96	287139	2584.52	0.0216854	0.177559	56.1294
2442	290428	2685.49	287637	2561.83	0.0209292	0.176655	56.0928
2443.65	290874	2793.68	288138	2560.77	0.0208913	0.176039	56.7274
2445.3	291323	2823.98	288573	2594.71	0.018664	0.175272	56.925
2446.95	291827	2847.92	289045	2632.66	0.018519	0.174376	56.437
2448.6	292338	2840.19	289550	2621.11	0.0174252	0.173366	56.0661
2450.25	292884	2888.95	290046	2668.42	0.0173074	0.172407	56.9531
2451.9	293437	2960.73	290450	2686.47	0.0160416	0.171523	58.1368
2453.55	294037	3015.55	290854	2792.37	0.0165126	0.170543	57.176
2455.2	294623	3043.07	291368	2827.05	0.0161725	0.169401	55.6816
2456.85	295225	3017.18	291972	2854.5	0.0173318	0.168302	55.3132
2458.5	295791	3006.87	292533	2832.55	0.0190964	0.167537	54.3163
2460.15	296306	3031.64	293152	2932.07	0.0170849	0.16632	54.0093
2461.8	296887	3026.61	293770	2994.26	0.0169903	0.165396	52.5101
2463.45	297474	3050.97	294468	3050.02	0.0159937	0.164001	53.0233
2465.1	298103	3056.7	295062	3023.28	0.0172297	0.162837	52.2062
2466.75	298691	3018.97	295704	2999.22	0.01744	0.161633	53.9063
2468.4	299277	2958.29	296162	3039.82	0.0185912	0.160323	56.1346
2470.05	299830	2921.83	296623	3013.74	0.0185759	0.159081	53.7652
2471.7	300389	2884.34	297366	3049.99	0.0169483	0.157781	52.1748
2473.35	301006	2799.49	298110	3056.75	0.0165925	0.156415	52.4961
2475	301641	2750.04	298705	3018.07	0.0178888	0.155084	53.9792
2476.65	302236	2713.81	299234	2961.15	0.0186417	0.15373	54.2524
2478.3	302812	2696	299800	2923.47	0.0190319	0.152423	55.7566
2479.95	303381	2690.34	300304	2896.12	0.0197105	0.151093	55.036
2481.6	303935	2629.91	300981	2801.39	0.0197655	0.149747	52.7767
2483.25	304492	2578.4	301766	2740.31	0.0210604	0.148436	53.4143
2484.9	305020	2513.51	302348	2707.48	0.0189874	0.147024	54.5734
2486.55	305611	2472.77	302890	2694.06	0.0182578	0.145729	55.6352
2488.2	306231	2367.89	303428	2689.98	0.0163766	0.144452	56.1096
2489.85	306929	2291.56	303984	2624.1	0.0168092	0.142994	56.4532
2491.5	307615	2242.27	304549	2573.3	0.0172378	0.141534	57.6116
2493.15	308291	2215.07	305054	2509.15	0.0169471	0.140146	57.9563
2494.8	308986	2181.09	305659	2469.63	0.0161219	0.138305	57.2612
2496.45	309726	2135.65	306371	2343.04	0.0162056	0.136776	54.8697
2498.1	310471	2111.68	307239	2262.95	0.016689	0.135235	56.1724
2499.75	311202	2112.23	307883	2227.56	0.0163776	0.13374	57.2954
2501.4	311955	2101.55	308539	2207.52	0.0167339	0.132245	57.0321
2503.05	312701	2078.5	309304	2162.34	0.0178206	0.130761	56.823
2504.7	313409	2071.71	310096	2112.28	0.0195424	0.129562	57.2589
2506.35	314060	2071.1	310839	2111.08	0.0196718	0.128735	58.8197
2508	314712	2074.61	311511	2113.21	0.0203571	0.12791	60.5337
2509.65	315345	2073.58	312184	2095.53	0.0205104	0.127167	60.5207
2511.3	315978	2076.33	312938	2070.65	0.0227941	0.12666	59.9595
2512.95	316550	2120.58	313668	2072.29	0.0243531	0.126241	59.4161
2514.6	317086	2170.98	314356	2070.2	0.0216744	0.125706	58.9155
2516.25	317692	2190.27	315036	2078.63	0.0209035	0.125356	58.7041
2517.9	318322	2216.36	315687	2068.02	0.0207152	0.125122	58.719
2519.55	318958	2236.97	316291	2085.25	0.0186935	0.124719	58.6601
2521.2	319666	2248.32	316853	2162.05	0.0189557	0.124597	59.3168
2522.85	320365	2258.42	317402	2183.07	0.0191792	0.124528	60.1615
2524.5	321055	2266.64	317981	2197.44	0.0199723	0.124154	61.0809
2526.15	321721	2277.73	318579	2230.65	0.0213564	0.124077	61.8581
2527.8	322343	2297.64	319205	2241.07	0.0224633	0.123908	60.9469
2529.45	322936	2316.95	319962	2252.96	0.0229543	0.123804	59.6459
2531.1	323517	2336.74	320727	2263.32	0.024232	0.123721	59.1678
2532.75	324067	2355.48	321430	2270.42	0.0246341	0.123876	60.0703
2534.4	324608	2344.89	322026	2285.42	0.0255171	0.123959	61.0473
2536.05	325130	2354.45	322589	2307.09	0.0266098	0.124298	62.0468
2537.7	325628	2362.85	323125	2322.32	0.0279226	0.124391	63.0764
2539.35	326104	2385.59	323652	2341.7	0.0271532	0.124857	63.8653
2541	326590	2396.2	324158	2358.47	0.0281535	0.125196	64.7846
2542.65	327058	2403.74	324652	2343.56	0.0297804	0.125539	65.9156
2544.3	327500	2415.24	325122	2354.34	0.0302218	0.126005	66.4829
2545.95	327933	2433.32	325590	2360.93	0.0297576	0.126467	66.1884
2547.6	328371	2448.07	326069	2384.81	0.0296169	0.126891	65.9725
2549.25	328810	2475.85	326554	2395.65	0.0304658	0.127259	66.0139
2550.9	329236	2489.78	327016	2402.74	0.0312951	0.12773	66.3507
2552.55	329649	2490.26	327439	2412.59	0.0302095	0.12832	66.388
2554.2	330074	2506.86	327862	2431.24	0.031815	0.128368	65.8123
2555.85	330478	2515.69	328319	2444.63	0.0297562	0.128627	64.9318
2557.5	330910	2519.63	328783	2474.96	0.0296021	0.12889	63.9955
2559.15	331342	2528.84	329236	2489.79	0.0303165	0.129115	63.2607
2560.8	331764	2521.57	329670	2490.28	0.0310571	0.129356	62.5434
2562.45	332174	2548.06	330114	2508.47	0.0296458	0.129665	61.671
2564.1	332603	2579.73	330545	2517.01	0.0285339	0.129943	60.7255
2565.75	333048	2588.71	331004	2520.3	0.0289965	0.130265	60.224
2567.4	333485	2579.81	331445	2531.45	0.0320025	0.130461	62.5041
2569.05	333881	2566.97	331787	2520.83	0.0347324	0.130615	65.1784
2570.7	334244	2549.41	332109	2542.07	0.0377745	0.13075	66.7472
2572.35	334578	2535	332479	2575.94	0.0378604	0.130768	65.7265
2574	334912	2521.36	332955	2590.49	0.0405991	0.130691	64.6901
2575.65	335223	2525.53	333431	2581.4	0.0392503	0.130574	64.9265
2577.3	335544	2534.03	333826	2569.79	0.0395471	0.130438	65.7678
2578.95	335864	2547.96	334172	2551.86	0.040462	0.130267	66.9818
2580.6	336177	2568.01	334482	2541.34	0.0386155	0.130082	67.7443
2582.25	336506	2587.34	334798	2520.52	0.0354307	0.129891	68.5353
2583.9	336864	2602.9	335100	2522.74	0.0338297	0.129717	69.2795
2585.55	337240	2623.91	335401	2529.58	0.0310333	0.129547	69.7216
2587.2	337651	2672.75	335713	2539.23	0.0283875	0.12944	70.1148
2588.85	338100	2764.48	336021	2556.97	0.0255896	0.129348	70.0366
2590.5	338598	2809.41	336345	2579.82	0.024083	0.129201	69.7965
2592.15	339129	2901.44	336698	2596.29	0.0230451	0.129032	69.4709
2593.8	339684	2993.35	337078	2611.34	0.0209224	0.128884	67.7361
2595.45	340295	3045.73	337531	2646.39	0.0187234	0.128756	65.688
2597.1	340980	3062.17	338043	2759.39	0.0172544	0.128582	63.7826
2598.75	341724	3088.94	338614	2810.82	0.0157472	0.128341	61.8402
2600.4	342540	3113.08	339234	2920	0.0134046	0.1281	59.7267
2602.05	343501	2917.13	339906	3029.6	0.0129736	0.127842	57.8686
2603.7	344496	2876.17	340649	3060.35	0.0137118	0.127558	56.2005
2605.35	345439	2868.95	341467	3064.83	0.0138059	0.127301	54.5456
2607	346378	2960.53	342370	3149.71	0.0142718	0.12707	52.7922
2608.65	347288	3017.53	343438	2919.72	0.0145578	0.126808	51.2005
2610.3	348182	3160.06	344557	2873.65	0.0148318	0.126538	49.9295
2611.95	349061	3277.8	345600	2868.1	0.0150637	0.126334	50.0687
2613.6	349928	3368.69	346529	2978.51	0.0156447	0.126192	50.4477
2615.25	350764	3471.47	347414	3024.04	0.0159473	0.126016	51.4015
2616.9	351585	3542.99	348247	3171.64	0.0154899	0.12583	51.7302
2618.55	352431	3658.22	349108	3284.03	0.0152495	0.125662	52.0298
2620.2	353292	3708.44	349959	3371.93	0.0153502	0.125504	52.2123
2621.85	354149	3751.15	350787	3474.37	0.0155796	0.125203	52.3214
2623.5	354995	3773.39	351610	3545.16	0.0154935	0.124989	52.3112
2625.15	355847	3922.61	352463	3662.64	0.0138757	0.124769	51.7615
2626.8	356800	3880.39	353366	3712.51	0.0140575	0.124553	51.3373
2628.45	357742	3919.52	354254	3756.36	0.014141	0.124358	52.2317
2630.1	358680	3881.31	355049	3774.63	0.0137388	0.124129	53.6086
2631.75	359648	3872.17	355819	3924.17	0.0141221	0.123802	54.838
2633.4	360592	3888.67	356690	3875.56	0.0146284	0.123358	53.93
2635.05	361506	3932.1	357712	3920.75	0.0145665	0.122905	52.7041
2636.7	362428	3989.36	358752	3878.38	0.0152862	0.122454	51.4743
2638.35	363309	4053.4	359818	3871	0.0156005	0.121978	50.2825
2640	364176	4154.06	360850	3894.58	0.0157904	0.121474	49.1964
2641.65	365036	4277.59	361854	3952.04	0.0147942	0.120991	47.9284
2643.3	365958	4395.66	362856	4017.22	0.015533	0.120557	46.8511
2644.95	366839	4502.52	363809	4093.29	0.0152396	0.120078	45.9428
2646.6	367741	4582.92	364741	4247.6	0.0156873	0.119606	46.8897
2648.25	368620	4657.1	365590	4333.84	0.0151468	0.119035	48.1929
2649.9	369535	4677.78	366419	4473.16	0.0153018	0.118424	49.3381
2651.55	370446	4691.8	367253	4531.44	0.0161292	0.117813	50.8398
2653.2	371314	4736.24	368066	4617.25	0.0170297	0.117168	52.2747
2654.85	372141	4762.72	368884	4676.05	0.017138	0.11651	52.2605
2656.5	372968	4767.81	369818	4678.53	0.0187399	0.115892	51.6648
2658.15	373727	4775.85	370768	4698.6	0.0173446	0.11511	50.8639
2659.8	374554	4773.6	371688	4761.99	0.0152841	0.114184	50.2981
2661.45	375499	4747.64	372570	4763.41	0.0153393	0.113143	49.9695
2663.1	376450	4707.44	373403	4772.64	0.0161358	0.112113	49.9089
2664.75	377362	4661.02	374231	4780.83	0.0167277	0.111228	49.8616
2666.4	378249	4615.83	375158	4760.11	0.0168546	0.110255	49.6849
2668.05	379137	4566.67	376146	4724.03	0.0177584	0.109355	50.4735
2669.7	379986	4528.89	377047	4674.87	0.0189854	0.108512	51.7884
2671.35	380787	4489.87	377889	4637.85	0.019052	0.107686	53.0117
2673	381592	4424.66	378729	4586.49	0.0199862	0.106927	54.2285
2674.65	382364	4346.88	379549	4546.64	0.0189844	0.106263	55.3617
2676.3	383182	4255.31	380334	4514.74	0.0180462	0.105566	55.9553
2677.95	384048	4179.98	381125	4471.31	0.0178581	0.104952	56.1613
2679.6	384928	4138.97	381922	4391.62	0.0193397	0.104367	56.6989
2681.25	385745	4101.83	382702	4312.62	0.0199647	0.103793	57.086
2682.9	386542	4032.55	383536	4212.97	0.0212961	0.103238	57.7412
2684.55	387292	3926.49	384389	4158.01	0.019114	0.10266	57.9396
2686.2	388133	3830.51	385251	4127.57	0.0174189	0.10212	59.1136
2687.85	389061	3736.58	386017	4087.68	0.0162517	0.101604	60.5836
2689.5	390060	3661.53	386744	4011.29	0.0175994	0.101146	61.3394
2691.15	390987	3629.69	387494	3895.3	0.0182484	0.100701	59.6434
2692.8	391885	3618.32	388467	3796.68	0.0188836	0.100285	57.714
2694.45	392756	3615.67	389552	3686.8	0.0204106	0.0999348	57.581
2696.1	393565	3623.59	390535	3637.88	0.0220641	0.099552	58.3076
2697.75	394316	3635	391420	3621.85	0.0227667	0.0990734	58.9161
2699.4	395048	3656.45	392288	3615.25	0.0246093	0.0986379	59.434
2701.05	395727	3671.37	393118	3615.99	0.0245572	0.0982336	59.9723
2702.7	396411	3684.83	393888	3629.06	0.0260451	0.0978464	61.0223
2704.35	397059	3700.24	394595	3638.87	0.0270836	0.0974455	63.4153
2706	397684	3725.24	395221	3663.18	0.0277022	0.0970502	65.7235
2707.65	398298	3735.28	395819	3672.85	0.0269125	0.0967205	66.3398
2709.3	398932	3753.36	396483	3686.29	0.0285218	0.0964392	66.6029
2710.95	399532	3759	397126	3701.86	0.0286445	0.0961523	66.4706
2712.6	400131	3773.64	397762	3728.49	0.0307736	0.095883	66.5894
2714.25	400690	3779.05	398380	3736.33	0.0303328	0.0955749	66.6405
2715.9	401259	3788.54	399016	3755.96	0.0322424	0.0951821	66.6354
2717.55	401797	3795.04	399625	3759.55	0.0325911	0.0947186	66.5397
2719.2	402331	3795.34	400231	3776.45	0.0327714	0.0941803	66.4528
2720.85	402866	3797.51	400808	3779.72	0.0344352	0.0935567	67.2639
2722.5	403378	3798.42	401359	3790.5	0.0339786	0.09282	68.2947
2724.15	403901	3797.65	401881	3795.92	0.0336033	0.0921203	69.1858
2725.8	404434	3792.42	402404	3795.24	0.0333111	0.0912286	69.2628
2727.45	404977	3782.42	402953	3797.94	0.0341701	0.0904596	68.9954
2729.1	405511	3772.72	403492	3798.55	0.0356923	0.0896626	69.0292
2730.75	406026	3760.32	404034	3797.35	0.0342977	0.0888818	68.7148
2732.4	406568	3745.03	404596	3790.43	0.0359813	0.088044	68.6072
2734.05	407088	3730.12	405158	3778.61	0.0353482	0.0873266	68.4203
2735.7	407623	3715.1	405706	3769.46	0.0354169	0.0862844	68.1037
2737.35	408163	3700.06	406264	3753.55	0.0339601	0.0853755	67.764
2739	408732	3684.41	406825	3737.82	0.0352542	0.0844455	67.6648
2740.65	409286	3671.07	407376	3721.74	0.034634	0.0836246	67.4208
2742.3	409856	3658.25	407938	3706.66	0.033211	0.0826419	67.1164
2743.95	410457	3646.45	408526	3689.42	0.032605	0.0816218	66.8886
2745.6	411077	3636.52	409115	3675.1	0.0326288	0.0811326	66.6724
2747.25	411700	3639.46	409697	3661.41	0.0305431	0.0802005	65.5976
2748.9	412374	3627.2	410344	3648.54	0.0297333	0.0795412	64.3235
2750.55	413072	3618.03	411015	3636.18	0.0305185	0.0790364	63.1527
2752.2	413756	3608.38	411685	3639.75	0.0296177	0.0778031	62.4694
2753.85	414472	3597.09	412412	3626.51	0.0293248	0.0773019	61.8791
2755.5	415200	3584.32	413141	3617.14	0.0295922	0.0762244	61.7757
2757.15	415931	3570.45	413860	3606.88	0.0296827	0.0757394	62.5261
2758.8	416665	3557.74	414566	3595.58	0.0305561	0.0743352	63.3802
2760.45	417392	3547.23	415305	3582.44	0.0302306	0.0733415	63.5477
2762.1	418136	3535.62	416060	3567.99	0.0290107	0.0724798	63.3357
2763.75	418920	3526.23	416823	3555.06	0.0294273	0.0714013	63.2014
2765.4	419706	3519.38	417589	3544.51	0.0283212	0.0707099	63.1156
2767.05	420530	3520.25	418367	3531.86	0.0280875	0.0698626	62.9823
2768.7	421371	3525.88	419182	3523.56	0.0259627	0.0691228	62.6494
2770.35	422290	3537.62	420015	3516.91	0.0258293	0.0683605	62.7339
2772	423224	3544.62	420867	3522.44	0.0251488	0.0672897	62.6486
2773.65	424199	3545.21	421780	3528.67	0.0278858	0.066419	62.8903
2775.3	425090	3560.67	422728	3545.3	0.0302972	0.0653074	63.0207
2776.95	425924	3599.94	423717	3543.94	0.0267581	0.0644431	62.4875
2778.6	426881	3669.19	424698	3546.52	0.0239739	0.0635028	61.9169
2780.25	427965	3770.63	425605	3579.22	0.020724	0.0626301	60.9905
2781.9	429236	3940.97	426580	3642.47	0.0175625	0.0616479	59.5072
2783.55	430760	4456.3	427723	3743.8	0.0138946	0.0611934	56.6294
2785.2	432701	4474.33	429109	3897.43	0.0118038	0.0617387	53.7417
2786.85	434965	4443.51	430744	4456.14	0.0118182	0.0623539	52.3359
2788.5	437204	4269.83	432751	4474.8	0.011447	0.0625473	51.7861
2790.15	439508	3976.26	435047	4442.34	0.011384	0.0622582	50.9279
2791.8	441836	3639.69	437385	4255.38	0.0109181	0.0620519	50.4046
2793.45	444272	3446.51	439752	3944.31	0.0119875	0.0621062	49.947
2795.1	446488	3395.37	442129	3597	0.0134766	0.062421	49.8122
2796.75	448450	3352.76	444528	3428.53	0.0152374	0.0625033	50.846
2798.4	450182	3353.81	446633	3392.92	0.01578	0.0628699	51.8254
2800.05	451845	3346.01	448493	3351.79	0.0172758	0.0633192	52.7502
2801.7	453354	3282.04	450140	3353.94	0.0164964	0.0634969	53.201
2803.35	454929	3097.56	451767	3348.96	0.015836	0.0636393	53.4518
2805	456566	2985.72	453261	3293.02	0.0164518	0.063645	52.4231
2806.65	458142	3075.05	454894	3099.94	0.0167943	0.0638582	51.0874
2808.3	459680	3161.6	456602	2983.26	0.0162263	0.0641909	49.97
2809.95	461265	3117	458228	3080.19	0.0145442	0.0645846	49.8357
2811.6	463021	3027.4	459759	3165.98	0.0149699	0.0647382	50.1122
2813.25	464724	2990.97	461324	3115.07	0.0158668	0.0651381	50.8896
2814.9	466320	2929.74	463005	3027.73	0.0150394	0.0653854	51.8772
2816.55	467998	2819.71	464629	2994.27	0.0136545	0.0655768	53.3383
2818.2	469841	2694.99	466129	2942.1	0.0138205	0.0653486	54.5882
2819.85	471668	2630.77	467726	2838.84	0.0157448	0.0654622	55.0524
2821.5	473269	2636.83	469502	2713.91	0.019137	0.0655998	56.1558
2823.15	474583	2541.3	471243	2616.82	0.0177061	0.0658024	57.2412
2824.8	475999	2472.81	472816	2668.48	0.0155538	0.0661846	58.7225
2826.45	477602	2439.64	474116	2577.6	0.0185198	0.0665605	59.5913
2828.1	478941	2403.25	475427	2475.72	0.0186854	0.0668308	58.9887
2829.75	480262	2387.56	476978	2467.84	0.0166549	0.0669689	58.0676
2831.4	481741	2333.49	478463	2400.73	0.0178853	0.0672353	57.6561
2833.05	483113	2307.94	479800	2407.77	0.0190536	0.0674681	57.3861
2834.7	484397	2293.64	481229	2345.23	0.0199124	0.0676983	57.762
2836.35	485621	2289.94	482606	2313.68	0.0208449	0.0680287	59.5561
2838	486784	2288.19	483812	2300.04	0.0211377	0.0683967	61.3399
2839.65	487926	2281.93	484957	2287.51	0.0226532	0.0688188	62.8222
2841.3	488984	2285.92	486063	2291.56	0.0241404	0.0691542	63.9677
2842.95	489972	2292.99	487149	2286.49	0.0237127	0.0694012	64.5641
2844.6	490975	2306.09	488227	2280.17	0.0234623	0.069496	63.1195
2846.25	491987	2320.05	489322	2288.48	0.0221284	0.0695318	61.1222
2847.9	493059	2331.29	490398	2295.94	0.021546	0.0695201	59.7403
2849.55	494161	2344.83	491464	2314.69	0.0213651	0.0695268	59.4325
2851.2	495272	2357.08	492519	2325.5	0.0208757	0.0696937	59.1342
2852.85	496406	2364.99	493613	2337.22	0.0210635	0.0699052	59.7258
2854.5	497526	2378.98	494683	2352.07	0.0207973	0.0701234	60.765
2856.15	498658	2399.49	495745	2361.1	0.0209099	0.0702971	61.6733
2857.8	499780	2420.23	496823	2367.44	0.0205435	0.0705125	60.813
2859.45	500919	2438.15	497980	2386.43	0.0200492	0.070694	59.61
2861.1	502084	2467	499159	2409.14	0.0199985	0.0708072	58.7424
2862.75	503249	2493.17	500326	2429.97	0.0202744	0.070878	58.547
2864.4	504397	2503.56	501484	2445.94	0.0203889	0.0708503	58.3585
2866.05	505539	2527.26	502659	2487.22	0.0187176	0.0707698	58.3361
2867.7	506785	2543.79	503820	2498.94	0.0194582	0.07073	59.0525
2869.35	507984	2572.41	504932	2507.86	0.0196478	0.0707743	59.5864
2871	509170	2599.38	506092	2544.94	0.0176666	0.0708994	59.1436
2872.65	510488	2615.84	507335	2542.88	0.0182911	0.0710525	58.7488
2874.3	511757	2619.01	508542	2597.8	0.0182821	0.0711794	58.3269
2875.95	513025	2600.39	509808	2600.98	0.0188208	0.0711814	58.1771
2877.6	514257	2583.09	511110	2629.44	0.0193083	0.0710731	58.1119
2879.25	515459	2553.64	512387	2608.84	0.0196798	0.0709176	58.0384
2880.9	516641	2529.55	513648	2592.15	0.0209611	0.0707711	58.0518
2882.55	517754	2520.84	514870	2573.96	0.0204738	0.0706008	57.9519
2884.2	518895	2522.38	516074	2532.42	0.0216414	0.0703689	59.0875
2885.85	519979	2539.56	517175	2526.85	0.0217916	0.0700542	60.302
2887.5	521059	2567.21	518256	2515.62	0.0219509	0.0697724	61.0465
2889.15	522137	2620.5	519349	2527.18	0.0221031	0.069465	60.5562
2890.8	523211	2679.05	520466	2549.13	0.0214939	0.0690218	59.8244
2892.45	524324	2731.63	521595	2583.52	0.0209127	0.0686328	59.3535
2894.1	525473	2794.32	522708	2659.49	0.0198424	0.0683017	59.0529
2895.75	526691	2835.66	523829	2703.03	0.0196442	0.0680731	59.0153
2897.4	527925	2839.28	524973	2769.21	0.0198382	0.0678453	59.8821
2899.05	529151	2843.35	526128	2827.21	0.0196148	0.0676857	60.8489
2900.7	530393	2872.77	527312	2844.99	0.0198562	0.0676517	60.9452
2902.35	531622	2923.95	528539	2833.55	0.0203168	0.0677339	58.9312
2904	532821	3002.67	529872	2854.9	0.0178826	0.067867	56.4632
2905.65	534180	3126.36	531226	2901.33	0.0147749	0.0679632	54.2087
2907.3	535823	3241.73	532541	2976.51	0.0133949	0.0681488	52.3757
2908.95	537631	3281.13	533958	3109.3	0.0140428	0.0683908	51.0567
2910.6	539349	3313.47	535632	3237.96	0.0144423	0.0687679	51.4989
2912.25	541010	3236.47	537366	3272.14	0.0143264	0.0694559	52.2267
2913.9	542668	3138.49	539008	3327.9	0.0132364	0.070347	52.5255
2915.55	544440	3051.78	540613	3259.99	0.013542	0.0715371	52.3973
2917.2	546144	2967.58	542218	3165.06	0.0140137	0.0730319	52.3948
2918.85	547756	2880.22	543875	3067.33	0.0139895	0.0748797	53.2564
2920.5	549331	2800.4	545434	3024.45	0.0150899	0.0770354	54.7945
2922.15	550750	2782.36	546856	2910.54	0.0163256	0.0792631	54.9716
2923.8	552026	2723.97	548322	2861.16	0.0178662	0.0813482	54.9246
2925.45	553161	2650.51	549746	2775.43	0.0175227	0.0836245	54.7741
2927.1	554287	2581.51	551036	2784.33	0.0169276	0.0865997	55.3927
2928.75	555412	2546.91	552131	2717.55	0.0192878	0.0896622	58.1364
2930.4	556367	2553.71	552980	2661.77	0.021362	0.0924045	60.9026
2932.05	557202	2633.59	553824	2609.18	0.0228236	0.0948112	61.1408
2933.7	557965	2646.92	554835	2548.73	0.0205492	0.09769	59.6248
2935.35	558787	2592.08	555861	2545.49	0.0195629	0.101534	58.4567
2937	559618	2588.66	556703	2559.18	0.0188201	0.104492	59.0328
2938.65	560457	2606.94	557402	2663.32	0.0179407	0.106081	60.0204
2940.3	561324	2595.55	558081	2643.54	0.0196633	0.108863	60.4711
2941.95	562094	2606.7	558795	2591.46	0.0200813	0.112104	59.0857
2943.6	562827	2605.76	559606	2588.4	0.0206674	0.114699	57.6201
2945.25	563523	2597.67	560452	2607.01	0.0215487	0.116883	57.7595
2946.9	564178	2586.66	561244	2594.14	0.0223343	0.119344	58.7837
2948.55	564797	2573.3	561900	2605.85	0.0227511	0.121318	59.8571
2950.2	565395	2561.4	562533	2608.61	0.0236018	0.122861	60.992
2951.85	565964	2554.87	563146	2602.67	0.0246431	0.124007	61.9886
2953.5	566504	2544.78	563747	2594.71	0.0240584	0.125808	62.5534
2955.15	567049	2517.03	564321	2584	0.0248902	0.126435	62.078
2956.8	567574	2506.99	564943	2570.04	0.0245737	0.126756	61.5554
2958.45	568103	2495.03	565550	2558.45	0.0251484	0.128168	61.5463
2960.1	568615	2495.07	566083	2553.85	0.0251894	0.129124	61.6994
2961.75	569123	2485.37	566598	2542.77	0.0255301	0.130762	62.0747
2963.4	569617	2472.11	567092	2514.62	0.025136	0.131445	63.0803
2965.05	570116	2460.92	567560	2507.32	0.0257609	0.13031	64.3149
2966.7	570608	2451.68	568061	2494.89	0.0253685	0.131107	64.6954
2968.35	571104	2443.38	568543	2496.44	0.0253151	0.128992	63.4995
2970	571609	2435.18	569140	2485.04	0.0254962	0.128413	62.2628
2971.65	572113	2426.68	569694	2470.02	0.0254152	0.126692	60.9235
2973.3	572626	2423.63	570275	2457.51	0.0249114	0.123739	59.5572
2974.95	573161	2431.38	570873	2447.04	0.0255891	0.120477	58.5006
2976.6	573696	2419.77	571472	2437.55	0.0249821	0.117661	59.693
2978.25	574257	2410.15	571984	2428.72	0.0256301	0.114732	61.2074
2979.9	574819	2401.81	572494	2420.66	0.0260905	0.11098	62.1901
2981.55	575388	2395.72	573063	2433.5	0.0263723	0.106768	61.7525
2983.2	575974	2389.79	573698	2419.72	0.0251985	0.102288	61.0965
2984.85	576615	2382.33	574377	2408.11	0.0247914	0.0973805	61.2668
2986.5	577298	2379.07	575037	2398.69	0.0246428	0.0939347	61.9719
2988.15	578011	2388.53	575665	2393.38	0.0257309	0.0896481	62.7157
2989.8	578726	2379.75	576354	2385.39	0.0270268	0.085428	62.7449
2991.45	579441	2374.22	577128	2376.31	0.027261	0.0820077	62.4391
2993.1	580179	2404.77	577937	2389.43	0.0264961	0.0786715	62.0453
2994.75	580970	2438.55	578756	2379.38	0.0229706	0.0752511	62.1513
2996.4	581925	2494.02	579563	2373.29	0.0205363	0.071568	62.2506
2998.05	583048	2577.27	580416	2416.9	0.0173847	0.0675151	59.821
2999.7	584453	2629.54	581497	2459.14	0.0170482	0.0636035	56.2287
3001.35	585975	2552.96	582859	2570.28	0.0169629	0.0603819	52.9013
3003	587586	2471.17	584551	2633.16	0.0170915	0.0576274	54.5854
3004.65	589261	2525.06	586126	2544.47	0.0202404	0.0549765	57.3626
3006.3	590744	2517.76	587735	2463.71	0.0192903	0.0525009	58.7638
3007.95	592373	2511.83	589454	2532.83	0.0183547	0.0501695	59.6879
3009.6	594165	2588.62	591046	2514.24	0.0201051	0.0478707	60.4297
3011.25	595879	2572.67	592815	2511.03	0.0184397	0.0458849	58.7383
3012.9	597829	2482.64	594793	2624.75	0.0163115	0.0440633	56.7367
3014.55	600125	2421.29	596825	2527.34	0.018386	0.0425949	55.3631
3016.2	602232	2414.3	599140	2424.34	0.0191768	0.041225	57.8987
3017.85	604319	2417.07	601291	2417.69	0.0201073	0.0400333	61.2149
3019.5	606369	2424.9	603306	2410.43	0.0218443	0.0388706	63.8193
3021.15	608312	2428.95	605337	2423.75	0.0241936	0.0379088	64.4673
3022.8	610111	2452.5	607377	2426.04	0.0261617	0.0370985	65.0466
3024.45	611811	2498.28	609279	2431.97	0.0256566	0.0364565	65.5413
3026.1	613575	2569.33	611049	2475.66	0.026739	0.0359551	66.3036
3027.75	615292	2680.76	612791	2527.36	0.0263052	0.0352445	66.678
3029.4	617071	2822.01	614563	2622.17	0.0247643	0.0346595	65.9174
3031.05	618994	2974.85	616387	2768.88	0.024944	0.034136	65.2256
3032.7	620931	3147.68	618322	2919.08	0.0248751	0.0337594	64.3623
3034.35	622896	3336.81	620317	3084.74	0.023563	0.0331368	63.1242
3036	625009	3542.91	622370	3295.15	0.0237375	0.0326491	61.929
3037.65	627138	3878.13	624533	3466.47	0.0176871	0.0325831	57.1819
3039.3	630002	4263.48	626863	3840.45	0.0122292	0.0329819	51.5031
3040.95	634092	4473.18	629917	4258.77	0.0119569	0.0342352	52.5353
3042.6	638123	4471.79	633724	4471.02	0.0119033	0.0349999	51.1324
3044.25	642084	4216.23	637782	4494.91	0.0128657	0.0356329	50.0138
3045.9	645683	4135.85	641767	4224.93	0.0146876	0.0365303	51.1235
3047.55	648758	4162.3	645208	4130.46	0.0157798	0.0377472	49.4162
3049.2	651528	4110.03	648357	4166.27	0.0153146	0.0389167	50.6236
3050.85	654297	3977.06	650991	4140.16	0.0164714	0.0401213	50.9715
3052.5	656793	3915.51	653634	3991.98	0.0156666	0.0413299	49.8157
3054.15	659342	3858.95	656175	3934.78	0.0146383	0.0426175	50.666
3055.8	661987	3834.46	658555	3860.62	0.0153293	0.0439792	47.8076
3057.45	664434	3658.15	661261	3854.87	0.0139208	0.0453929	46.5327
3059.1	667045	3291.64	663748	3784.86	0.0148952	0.046854	51.0982
3060.75	669409	3118.36	665868	3393.24	0.0167036	0.0483701	50.7681
3062.4	671452	2922.23	668255	3187.27	0.0151718	0.0498907	51.2464
3064.05	673632	2792.82	670329	3063.45	0.0156824	0.051521	55.0442
3065.7	675674	2826.59	672065	2845.08	0.0179494	0.0531662	52.4842
3067.35	677403	2748.5	674262	2771.78	0.0178461	0.0547261	54.2302
3069	679092	2785.16	676022	2840.1	0.0189953	0.0561548	54.8595
3070.65	680639	2709.44	677627	2733.6	0.0184622	0.057538	52.7421
3072.3	682192	2601.68	679341	2793.92	0.0166437	0.0588388	55.9407
3073.95	683877	2493.31	680647	2708.91	0.0183453	0.059946	54.5988
3075.6	685378	2440.49	682220	2599.77	0.0186143	0.061136	54.3656
3077.25	686827	2408.83	683853	2494.19	0.0197381	0.0619093	55.6055
3078.9	688178	2400.19	685248	2443.65	0.0204138	0.062752	56.6452
3080.55	689466	2395.56	686604	2410.52	0.0211192	0.0633853	57.5133
3082.2	690698	2381.7	687895	2400.78	0.021654	0.0640567	57.1614
3083.85	691888	2362.8	689183	2398.06	0.0218203	0.0646008	57.817
3085.5	693058	2351.03	690373	2387.53	0.0226075	0.0650483	58.7112
3087.15	694180	2344.99	691514	2367.06	0.0232257	0.0653671	57.1731
3088.8	695267	2344.04	692748	2352.99	0.0239376	0.0651484	58.317
3090.45	696325	2350.58	693841	2346.09	0.0249055	0.0647621	59.299
3092.1	697348	2361.73	694911	2342.62	0.0246084	0.0645436	58.6276
3093.75	698387	2372.08	696015	2347.03	0.0247843	0.0640199	60.1032
3095.4	699427	2381.65	697009	2358.39	0.0251257	0.0635099	60.1038
3097.05	700461	2387.34	698061	2368.73	0.0248597	0.063135	59.9051
3098.7	701512	2391.01	699123	2379.63	0.0246598	0.0628418	61.1712
3100.35	702577	2393.92	700120	2386.25	0.023468	0.0624386	61.0506
3102	703703	2393.23	701186	2389.67	0.0233464	0.0620794	61.2188
3103.65	704842	2396.06	702254	2394.07	0.0245353	0.0616112	60.0975
3105.3	705933	2414.85	703428	2393.52	0.0236102	0.061032	59.7768
3106.95	707078	2444.08	704601	2392.28	0.0228914	0.0603089	60.8289
3108.6	708273	2513.31	705689	2409.38	0.0216352	0.0592682	61.5133
3110.25	709560	2712.17	706838	2435.17	0.0206963	0.0582326	61.3142
3111.9	710929	2808.05	708077	2481.18	0.0207372	0.0568968	60.9068
3113.55	712328	2915.67	709431	2703.14	0.0200428	0.0554896	59.3456
3115.2	713811	3028.56	710935	2808.46	0.0194704	0.054361	59.2366
3116.85	715370	3205.06	712399	2921.2	0.0199785	0.0533493	58.8117
3118.5	716918	3355.93	713965	3040.23	0.0177973	0.0525355	58.3069
3120.15	718683	3482.88	715592	3231.12	0.0163203	0.0519859	57.0831
3121.8	720628	3583.6	717274	3389.4	0.0160434	0.0517159	51.6456
3123.45	722616	3644.01	719424	3532.07	0.0175032	0.051645	54.2608
3125.1	724442	3648.19	721227	3609.29	0.0179952	0.0517383	56.6671
3126.75	726214	3638.88	723024	3654.19	0.0177127	0.0517621	55.2251
3128.4	728013	3570.39	724916	3646.18	0.0181319	0.0519582	54.7046
3130.05	729765	3543.22	726713	3636.07	0.0190606	0.0519884	54.001
3131.7	731430	3550.44	728536	3543.99	0.0204642	0.0519936	53.4849
3133.35	732981	3582.29	730289	3542.89	0.0201735	0.0520105	55.7997
3135	734553	3651.63	731804	3552.91	0.0203105	0.052149	53.7519
3136.65	736111	3753.57	733454	3594.11	0.0190958	0.0526056	53.6412
3138.3	737754	3831.24	735005	3675.26	0.0157446	0.0529576	53.4678
3139.95	739733	3929.41	736577	3786.59	0.0152489	0.0530159	50.3831
3141.6	741774	3987.83	738508	3859.88	0.0150547	0.0529762	48.7376
3143.25	743842	3971.38	740621	3979.84	0.0155445	0.0532263	50.3998
3144.9	745837	3903.97	742548	3993.2	0.0156268	0.0533552	50.7908
3146.55	747816	3850.34	744556	3959.36	0.0155422	0.0532237	50.9119
3148.2	749810	3850.98	746545	3873.36	0.0152697	0.0528336	51.1348
3149.85	751856	3796.95	748539	3837.23	0.0146393	0.0521607	52.3608
3151.5	754016	3655.24	750515	3858.61	0.0149435	0.0512152	53.3324
3153.15	756172	3546.16	752600	3762.69	0.0163654	0.0500648	52.225
3154.8	758186	3538.49	754912	3587.3	0.0190104	0.0486143	53.2395
3156.45	759971	3556.19	757041	3517.8	0.0172669	0.0471929	52.5588
3158.1	761996	3457.83	759073	3554.51	0.0150824	0.0459134	54.1336
3159.75	764379	3288.34	760971	3558.06	0.0170453	0.0447703	57.8709
3161.4	766541	3186.12	763020	3357.72	0.0187699	0.0437431	57.8345
3163.05	768551	3049.6	765388	3236.81	0.0164926	0.0428822	57.1936
3164.7	770884	2906.34	767573	3140.75	0.0171987	0.0422232	59.1477
3166.35	773156	2825.45	769686	2943.79	0.0202294	0.0415481	58.0591
3168	775119	2760.95	772106	2868.13	0.0192379	0.04084	59.2609
3169.65	777219	2730.93	774203	2782.89	0.0210944	0.0401867	59.6902
3171.3	779166	2731.71	776266	2733.5	0.022574	0.0395621	60.8635
3172.95	781013	2764.26	778272	2728.1	0.0235223	0.0390713	62.5035
3174.6	782809	2844.89	780126	2735.59	0.0234326	0.0385669	61.3214
3176.25	784634	2969.96	782031	2797.15	0.0244961	0.0381857	62.0237
3177.9	786398	3133.32	783839	2908.16	0.0261266	0.0380025	64.3713
3179.55	788060	3407.74	785547	3040.91	0.0275896	0.0378778	63.4653
3181.2	789639	3812.1	787301	3231.29	0.0245427	0.0378327	64.6017
3182.85	791416	4355.05	788879	3598.07	0.0217534	0.0379048	64.8947
3184.5	793417	5123.64	790544	4066.97	0.0186816	0.0380569	59.8271
3186.15	795738	6354.57	792657	4764.92	0.0159103	0.0381424	56.6097
3187.8	798457	8028.47	795022	5880.79	0.0138267	0.0381168	57.3714
3189.45	801588	9613.81	797572	7567.96	0.0137974	0.0380067	58.8416
3191.1	804734	11049.4	800475	9079.09	0.0136295	0.0377533	57.2623
3192.75	807941	12371	803758	10656.9	0.0148098	0.0374553	56.0829

## Sheet: EDML
EDML
Depth (m)	Ice age (a B1950)	Ice age std (a)	Gas age (a B1950)	Gas age std (a)	Accu. Rate (m ie)	Thinning	LIDIE (m ie)
18	70	85.9174	-1	-1	0.0667753	0.996548	-1
21	96.7573	87.4493	-1	-1	0.0759556	0.996468	11.1235
24	121.153	93.5505	-41.4438	31.4279	0.0710066	0.996092	13.1888
27	147.879	99.1783	-42.922	34.3856	0.0627446	0.995668	15.1961
30	178.992	99.9233	-42.3297	37.1728	0.0690556	0.995204	17.1346
33	208.038	102.04	-39.5886	40.1348	0.069602	0.994666	19.1709
36	237.596	105.056	-37.2749	43.0012	0.0686864	0.99393	21.229
39	268.201	108.252	-34.3811	46.2231	0.0686853	0.992961	23.4863
42	299.345	104.903	-33.7079	49.537	0.066953	0.991751	25.6856
45	332.129	108.528	-31.0929	52.9592	0.0714637	0.990797	27.8886
48	363.368	118.545	-27.9768	56.2828	0.0712252	0.989668	30.2836
51	395.207	118.89	-27.0655	59.1487	0.0637416	0.988014	32.5519
54	431.561	116.737	-23.645	61.9157	0.0646017	0.986707	34.6425
57	468.205	117.531	-17.0578	64.6125	0.0672505	0.984852	36.7658
60	503.985	120.215	-10.0713	68.2718	0.065726	0.983563	39.1499
63	541.148	120.106	-6.71423	71.6682	0.067254	0.981991	41.603
66	578.122	118.875	-3.59034	74.7034	0.0685589	0.980016	44.0741
69	615.018	117.755	0.135211	77.8223	0.0706011	0.977992	46.6249
72	651.423	136.445	3.37268	81.1211	0.0624365	0.97612	49.1069
75	693.153	130.554	7.94918	84.5377	0.0661616	0.974145	51.5852
78	732.933	131.052	12.7953	88.2005	0.0659112	0.972085	54.4622
81	773.212	123.026	12.7106	92.0576	0.072406	0.970084	57.5166
84	810.708	131.819	10.9981	92.6381	0.0684237	0.968167	58.3645
87	850.811	133.958	38.8769	91.5151	0.0679831	0.96621	57.9586
90	891.858	131.388	82.5347	83.663	0.0703291	0.964394	58.513
93	931.887	140.142	111.735	91.4367	0.0664986	0.962613	58.6652
96	974.704	138.388	146.031	99.1341	0.0681455	0.960704	58.5384
99	1017.19	135.459	189.622	100.178	0.0702259	0.959253	58.4623
102	1058.55	137.793	229.709	104.232	0.0677315	0.95801	58.1253
105	1101.02	136.622	273.532	108.808	0.0704064	0.956951	58.0963
108	1143.11	104.646	314.992	102.536	0.0928096	0.955708	57.7014
111	1175.21	131.839	360.694	118.517	0.0762761	0.954517	57.6145
114	1214.64	146.872	402.714	118.971	0.0670562	0.953384	57.6108
117	1259.76	145.915	448.033	115.461	0.0677615	0.952383	57.4261
120	1304.23	148.993	494.484	120.227	0.0660756	0.951018	57.4876
123	1350.15	133.531	538.072	120.173	0.0742807	0.949871	57.8101
125.5	1384.44	140.374	570.439	119.466	0.0681048	0.949142	57.6199
127	1406.96	141.168	595.13	117.567	0.0757432	0.94867	57.4731
128.5	1427.22	148.589	618.699	117.79	0.0679701	0.948173	57.571
130	1449.82	140.436	638.655	135.099	0.0671761	0.947715	57.7184
131.5	1472.69	135.415	658.729	137.216	0.0752839	0.9472	58.4932
133	1493.12	150.807	671.059	130.733	0.0733642	0.946758	58.4347
134.5	1514.09	155.113	695.91	130.532	0.0628365	0.946314	58.3682
136	1538.58	146.138	719.809	131.501	0.0667331	0.945836	58.1598
137.5	1561.66	152.185	745.501	130.623	0.0705032	0.945316	57.8657
139	1583.52	143.189	772.518	123.068	0.0657618	0.944748	58.615
140.5	1606.97	154.056	783.656	122.392	0.0754267	0.944148	58.312
142	1627.43	141.462	808.807	131.819	0.0647436	0.943541	58.6704
143.5	1651.28	152.803	825.906	131.82	0.0763228	0.942898	58.6704
145	1671.53	151.373	848.189	134.336	0.0641466	0.942207	58.5766
146.5	1695.64	141.173	872.187	130.88	0.0725918	0.94151	58.5508
148	1716.97	148.879	895.167	131.474	0.0747362	0.940861	58.6381
149.5	1737.7	155.735	915.864	140.701	0.0685832	0.940206	58.5169
151	1760.3	153.068	939.94	139.86	0.0664996	0.939498	58.2139
152.5	1783.63	153.628	967.436	138.147	0.0691077	0.938777	57.9951
154	1806.11	143.708	993.556	139.012	0.0674774	0.938071	58.3689
155.5	1829.14	138.635	1011.09	134.663	0.0776579	0.93738	57.9614
157	1849.17	149.074	1039.3	138.346	0.0735066	0.936671	57.9403
158.5	1870.35	159.943	1062.23	137.687	0.0717304	0.935948	57.6372
160	1892.07	154.223	1089.31	136.563	0.064312	0.93523	57.5626
161.5	1916.32	144.097	1112.72	136.681	0.0677944	0.934465	57.6147
163	1939.34	142.735	1134.25	104.593	0.0739227	0.933673	57.5706
164.5	1960.48	147.816	1153.78	104.709	0.0750698	0.932861	57.6424
166	1981.31	154.509	1169.9	127.653	0.0713628	0.932027	57.4062
167.5	2003.24	150.666	1192.42	145.411	0.0677588	0.931156	57.2772
169	2026.36	147.259	1214.7	146.876	0.0737976	0.930259	57.7506
170.5	2047.62	158.832	1231.45	147.343	0.0726362	0.929335	57.8963
172	2069.24	165.372	1253.1	144.877	0.0745232	0.928386	57.6972
173.5	2090.33	176.783	1279.53	148.994	0.0700539	0.927419	57.5058
175	2112.79	173.371	1305.67	148.993	0.0627989	0.926442	57.5262
176.5	2137.88	171.877	1329.48	133.472	0.0664353	0.925458	57.5368
178	2161.62	147.32	1352.98	133.539	0.0694616	0.92444	57.4432
179.5	2184.35	148.929	1375.69	146.812	0.0782232	0.923432	57.6736
181	2204.56	182.994	1395.05	132.556	0.0767529	0.922418	57.7709
182.5	2225.18	184.438	1416.13	147.8	0.0634688	0.92148	57.9168
184	2250.15	157.784	1436.27	149.233	0.069992	0.920562	57.8809
185.5	2272.81	156.4	1460.39	133.574	0.0730304	0.919674	57.9937
187	2294.55	161.956	1481.45	136.727	0.0745675	0.918894	58.0865
188.5	2315.87	176.082	1501.59	161.041	0.064334	0.917906	58.3743
190	2340.6	165.857	1520.58	152.032	0.0695038	0.917058	58.4934
191.5	2363.51	162.646	1543.81	144.425	0.0707952	0.916129	58.4689
193	2386.04	160.603	1567.83	154.867	0.0728377	0.915219	58.3609
194.5	2407.95	169.703	1592.65	136.393	0.0690354	0.914308	58.7174
196	2431.09	180.336	1611.16	159.227	0.0729626	0.913357	58.7261
197.5	2453.02	179.555	1633.16	135.198	0.0648285	0.912408	58.516
199	2477.72	175.147	1659.64	160.929	0.066865	0.911519	58.5904
200.5	2501.7	173.2	1681.29	143.524	0.0702681	0.910494	58.8206
202	2524.54	186.97	1702.15	140.107	0.0676303	0.909495	58.9232
203.5	2548.3	178.967	1722.86	152.365	0.0652852	0.908602	58.8434
205	2572.94	180.705	1746.12	157.649	0.068023	0.90777	59.1254
206.5	2596.61	192.045	1765.75	151.309	0.0633254	0.906894	58.9288
208	2622.07	175.504	1792.49	154.776	0.0736022	0.906043	58.8525
209.5	2643.99	179.892	1817.13	134.751	0.0711541	0.905092	58.6822
211	2666.69	183.778	1841.67	142.685	0.0691215	0.904163	58.6319
212.5	2690.09	168.499	1863.92	161.634	0.0681337	0.903339	58.0167
214	2713.84	173.101	1894.82	153.498	0.07449	0.902527	57.9081
215.5	2735.59	177.068	1921.28	141.926	0.0709846	0.901732	58.1377
217	2758.44	178.93	1941.62	142.837	0.0688194	0.901031	58.455
218.5	2782.03	166.168	1959.26	147.426	0.0702345	0.900456	58.2372
220	2805.16	170.984	1983.56	155.234	0.0764577	0.899856	58.1903
221.5	2826.42	170.749	2006.9	141.967	0.0718097	0.899551	58.2466
223	2849.07	167.095	2029.31	144.418	0.0715891	0.899016	58.3365
224.5	2871.8	168.589	2049.93	160.654	0.0739448	0.898457	64.005
226	2893.82	166.984	1995.39	169.334	0.0754371	0.897828	63.9546
227.5	2915.43	170.538	2019.51	153.878	0.0736174	0.897225	62.1006
229	2937.58	170.787	2066.48	158.824	0.0695678	0.896636	64.1465
230.5	2961.04	173.362	2061.53	156.486	0.0728468	0.896031	64.7973
232	2983.46	179.511	2075.01	179.11	0.0721776	0.895391	62.4736
233.5	3006.11	180.281	2131.12	170.589	0.0704989	0.894663	62.6788
235	3029.32	182.652	2153.04	174.767	0.0693374	0.893968	64.0926
236.5	3052.94	192.584	2157	146.993	0.0675134	0.893343	63.255
238	3077.21	193.61	2191.4	149.428	0.0650026	0.892711	64.2236
239.5	3102.44	181.734	2200.25	182.692	0.070929	0.892136	63.7328
241	3125.58	188.207	2228.05	184.638	0.0646241	0.891541	64.0868
242.5	3151	187.988	2248.34	157.895	0.0712545	0.89103	62.737
244	3174.06	191.925	2289.69	155.368	0.0637095	0.89055	62.9388
245.5	3199.87	183.609	2308.97	181.492	0.0782613	0.890102	63.4479
247	3220.9	185.526	2325.48	168.536	0.0698683	0.889698	63.3612
248.5	3244.46	186.143	2351.18	163.982	0.0689256	0.889333	62.557
250	3268.36	185.754	2385.36	160.281	0.0675527	0.889002	62.6774
251.5	3292.76	185.84	2406.06	170.195	0.0687494	0.888689	62.9318
253	3316.74	174.8	2425.9	165.025	0.0687385	0.888477	64.081
254.5	3340.73	176.596	2433.04	186.061	0.0739402	0.888263	63.9535
256	3363.04	179.964	2457.43	178.12	0.0726342	0.88798	63.0099
257.5	3385.76	181.264	2496.11	172.453	0.0706167	0.887727	63.8961
259	3409.14	168.358	2507.24	173.941	0.0739123	0.887446	64.3333
260.5	3431.48	189.143	2524.36	187.029	0.078704	0.887094	64.1707
262	3452.47	198.481	2550.99	178.059	0.068456	0.886745	63.5209
263.5	3476.62	202.251	2585.29	182.194	0.0641257	0.88654	64.7357
265	3502.41	204.343	2591.8	196.925	0.0653996	0.886265	64.9206
266.5	3527.7	189.064	2614.42	173.975	0.0716058	0.88584	64.2476
268	3550.82	193.482	2646.92	180.48	0.0698046	0.885664	64.3774
269.5	3574.53	197.355	2668.13	184.018	0.0679076	0.885366	65.4359
271	3598.92	188.534	2676.9	165.945	0.0665137	0.884977	63.3237
272.5	3623.84	179.299	2729.83	176.199	0.0713509	0.884625	63.8925
274	3647.07	181.531	2744.94	178.477	0.0732617	0.88407	64.7421
275.5	3669.72	201.425	2756.68	179.885	0.0669136	0.883655	64.3817
277	3694.53	184.471	2785.77	164.144	0.074616	0.883007	63.9262
278.5	3716.79	187.218	2815.11	174.496	0.0725341	0.882479	63.7969
280	3739.71	187.843	2839.37	166.458	0.0704124	0.881944	62.5122
281.5	3763.34	180.28	2880	169.128	0.0709221	0.881152	63.6305
283	3786.82	186.586	2888	165.909	0.0731728	0.880778	63.394
284.5	3809.59	190.782	2913.2	170.565	0.0690162	0.880052	63.6023
286	3833.75	191.892	2933.29	170.315	0.0695055	0.879376	62.7476
287.5	3857.76	188.836	2968.93	174.229	0.0691302	0.878643	64.1805
289	3881.92	188.252	2972.84	177.851	0.0717055	0.878114	65.3319
290.5	3905.23	175.397	2980.36	179.405	0.0776548	0.877227	63.777
292	3926.78	186.74	3025.51	180.94	0.0718841	0.875671	63.7375
293.5	3950.1	195.348	3051.28	192.514	0.0714643	0.875127	63.3579
295	3973.58	201.546	3081.84	193.805	0.0666276	0.8743	63.7593
296.5	3998.78	196.521	3101.99	180.956	0.0663822	0.873509	64.8273
298	4024.11	197.822	3111.29	197.139	0.0711567	0.872284	64.6022
299.5	4047.77	199.14	3140.16	179.093	0.0684815	0.871883	64.2816
301	4072.36	191.142	3169.1	202.853	0.0679734	0.871275	64.948
302.5	4097.16	184.667	3184.86	168.128	0.0733794	0.870858	65.5785
304	4120.15	191.668	3201.23	185.01	0.0743134	0.870122	63.4495
305.5	4142.86	201.989	3253.19	186.372	0.068504	0.869082	62.6883
307	4167.54	203.294	3289.45	184.896	0.0671735	0.868366	63.0753
308.5	4192.72	180.419	3308.79	190.415	0.0688729	0.867676	64.7183
310	4217.31	189.693	3310.21	174.311	0.0754167	0.866783	63.5608
311.5	4239.79	198.363	3350.88	177.357	0.0698156	0.865864	63.4403
313	4264.09	206.351	3375.96	182.735	0.074537	0.86511	63.2993
314.5	4286.88	205.235	3401.83	178.85	0.0678355	0.864343	64.5242
316	4311.95	208.391	3409.16	168.324	0.0674452	0.863297	64.5513
317.5	4337.19	195.833	3432.19	189.809	0.0726807	0.862413	63.1282
319	4360.64	200.505	3474.52	207.908	0.0652545	0.861326	64.7616
320.5	4386.8	215.514	3476.7	202.052	0.071479	0.860134	64.2212
322	4410.71	214.308	3511.9	205.189	0.062782	0.858981	65.203
323.5	4437.97	204.191	3524	188.355	0.0680152	0.857882	63.7311
325	4463.17	203.851	3568.99	196.956	0.0684283	0.856693	64.8499
326.5	4488.25	211.797	3578.61	197.65	0.0698268	0.855475	63.765
328	4512.87	207.87	3620.27	178.956	0.0660993	0.854302	63.4441
329.5	4538.92	202.436	3649.28	181.743	0.069744	0.853143	64.2626
331	4563.63	202.044	3662.34	199.942	0.0726239	0.851912	64.6054
332.5	4587.41	211.004	3682.91	204.076	0.0699052	0.850716	65.8067
334	4612.14	219.216	3691.81	184.136	0.0674453	0.849474	64.2949
335.5	4637.82	224.653	3735.69	189.549	0.0648899	0.848245	64.3494
337	4664.55	210.973	3759.78	179.326	0.0650894	0.847037	63.1393
338.5	4691.24	214.888	3800.57	190.279	0.0696293	0.845883	63.4002
340	4716.22	219.352	3821.81	191.465	0.0676749	0.84474	64.1987
341.5	4741.96	200.723	3836.11	191.977	0.0664437	0.843562	63.7603
343	4768.21	202.23	3867.53	187.418	0.0653103	0.842373	64.3124
344.5	4794.97	211.538	3885.23	188.444	0.0744233	0.841347	64.8217
346	4818.47	215.294	3902.85	174.108	0.0680713	0.840352	64.8752
347.5	4844.2	210.253	3924.93	186.056	0.069979	0.839458	63.9124
349	4869.26	198.932	3962	199.738	0.0680421	0.838252	63.667
350.5	4895.07	201.354	3991.27	204.307	0.0731811	0.837067	64.6289
352	4919.11	208.654	4004.04	191.071	0.0741032	0.835784	64.3633
353.5	4942.88	209.126	4034	201.151	0.0702796	0.83471	65.1617
355	4967.98	211.448	4048.11	199.089	0.0723586	0.833584	63.8726
356.5	4992.4	230.593	4092.16	184.654	0.0657397	0.832667	63.9976
358	5019.3	232.876	4114.86	184.715	0.065	0.831776	64.8696
359.5	5046.55	220.963	4127.37	201.17	0.0709331	0.830721	63.7166
361	5071.54	226.72	4168.02	203.319	0.0652789	0.829906	64.4773
362.5	5098.73	218.639	4183.34	176.88	0.0637205	0.829104	62.871
364	5126.62	232.509	4230.16	194.54	0.0684895	0.827908	63.8019
365.5	5152.6	241.037	4242.24	199.338	0.0685937	0.825412	64.2258
367	5178.62	243.933	4263.46	206.382	0.0619249	0.824129	64.2278
368.5	5207.5	227.988	4287.68	205.196	0.0735535	0.823155	63.3193
370	5231.83	219.792	4326.73	210.337	0.0674879	0.822397	64.9222
371.5	5258.39	212.426	4330.23	195.958	0.0710271	0.821721	65.1434
373	5283.64	223.771	4352.04	195.566	0.072401	0.820962	63.7628
374.5	5308.44	232.88	4397.33	221.556	0.0702469	0.82038	63.4712
376	5334.01	234.393	4427.91	204.995	0.0649491	0.819917	63.6076
377.5	5361.7	240.765	4452.52	203.029	0.0648058	0.819345	63.2975
379	5389.46	240.66	4482.67	205.356	0.0621274	0.818004	64.7365
380.5	5418.47	227.354	4489.18	212.861	0.0674135	0.81747	63.4556
382	5445.23	224.967	4533.07	203.616	0.0698473	0.81642	63.5903
383.5	5471.09	228.484	4557.42	198.699	0.0676929	0.815825	64.4388
385	5497.79	238.558	4570.92	205.967	0.0679705	0.815185	64.0974
386.5	5524.41	244.924	4600.43	214.982	0.0659344	0.814621	64.3998
388	5551.87	242.271	4622.06	222.799	0.0644224	0.814148	64.1321
389.5	5579.99	237.688	4652.72	226.406	0.0647968	0.813926	65.3167
391	5607.96	234.257	4662.27	210.638	0.0652981	0.813551	65.08
392.5	5635.73	244.519	4692.85	215.125	0.067151	0.812985	64.4435
394	5662.76	247.031	4727.65	221.42	0.0640131	0.812455	65.0015
395.5	5691.13	252.847	4746.21	194.574	0.0636317	0.811519	63.494
397	5719.7	225.995	4795.84	211.841	0.0657456	0.811085	63.2416
398.5	5747.37	232.372	4823.55	216.069	0.0717964	0.81041	64.3847
400	5772.74	222.099	4833.9	214.906	0.0686991	0.809556	63.6602
401.5	5799.27	223.937	4870.25	198.487	0.07332	0.80906	63.1613
403	5824.16	245.89	4903.16	202.288	0.0661267	0.808275	64.2344
404.5	5851.77	245.883	4913.91	208.551	0.0643217	0.807987	63.6627
406	5880.18	249.268	4945.7	209.182	0.0657627	0.807828	64.1227
407.5	5907.97	252.465	4964.71	206.493	0.0643164	0.806911	64.8927
409	5936.42	227.471	4979.95	229.536	0.0628532	0.805231	64.0619
410.5	5965.59	229.924	5019.88	232.924	0.0710226	0.804207	64.7479
412	5991.45	238.199	5038.2	214.948	0.065236	0.803525	65.0839
413.5	6019.62	260.335	5060.11	230.741	0.0687253	0.803072	64.4049
415	6046.38	248.028	5096.98	217.768	0.0606919	0.801981	63.3468
416.5	6076.72	234.972	5141.22	239.771	0.0726205	0.800936	62.5826
418	6102.12	245.975	5179.34	244.013	0.0703838	0.800187	63.6187
419.5	6128.35	256.463	5192.96	247.566	0.0658936	0.799639	64.6049
421	6156.38	259.13	5207.14	228.11	0.0666239	0.798405	64.3619
422.5	6184.16	276.864	5236.5	218.219	0.0632945	0.797497	64.5592
424	6213.43	279.351	5261.2	211.682	0.0667264	0.796679	63.6471
425.5	6241.23	267.559	5299.58	232.356	0.0624913	0.796377	62.8656
427	6270.92	279.812	5336.24	234.525	0.0654598	0.79629	63.7436
428.5	6299.27	271.218	5350.97	236.164	0.0620189	0.795307	63.8198
430	6329.24	270.916	5378.81	248.104	0.0650029	0.794234	63.9559
431.5	6357.87	283.542	5406.64	228.654	0.0639405	0.792809	63.4734
433	6387.03	281.847	5442.98	224.66	0.0601653	0.792984	62.9255
434.5	6418.01	251.168	5476.57	229.231	0.0600276	0.791689	63.8379
436	6449.12	260.442	5491.74	235.191	0.0697317	0.790298	65.3122
437.5	6475.95	256.107	5499.02	239.242	0.0651134	0.789785	64.4595
439	6504.7	252.566	5538.91	248.169	0.0679784	0.789438	65.4041
440.5	6532.26	259.422	5553	241.757	0.0656308	0.788458	63.7953
442	6560.84	269.359	5606.45	233.7	0.0658111	0.787577	63.6232
443.5	6589.37	269.244	5637.85	245.304	0.0613713	0.786658	63.3911
445	6620.01	234.476	5669.69	247.512	0.0667301	0.785999	63.345
446.5	6648.21	245.766	5699.69	254.98	0.0700235	0.785214	64.9617
448	6675.11	230.985	5704.72	222.543	0.0652025	0.784879	63.8158
449.5	6704.02	238.502	5749.97	232.971	0.0679554	0.784333	63.6828
451	6731.78	235.475	5778.03	219.573	0.0599503	0.783968	63.8348
452.5	6763.26	233.694	5802.68	224.636	0.0639204	0.783758	65.1935
454	6792.8	228.345	5809.9	248.443	0.0650311	0.784151	65.2156
455.5	6821.82	232.62	5835.22	243.91	0.0653984	0.784142	63.6388
457	6850.67	221.045	5886.87	250.066	0.0621761	0.783885	63.54
458.5	6881.04	221.467	5916.7	253.458	0.0662522	0.783636	64.1706
460	6909.55	221.216	5936	227.436	0.0634408	0.783061	62.9559
461.5	6939.35	232.394	5982.58	231.352	0.0636764	0.783695	64.2753
463	6969.01	213.761	5989.7	236.824	0.0586574	0.783203	63.1343
464.5	7001.24	208.21	6034.64	272.138	0.0683842	0.782936	63.662
466	7028.89	215.275	6055.34	229.612	0.0638417	0.782234	63.4129
467.5	7058.54	217.382	6088.41	237.903	0.0626985	0.781914	63.0405
469	7088.75	212.435	6119.78	256.376	0.0636739	0.781768	63.0672
470.5	7118.5	217.579	6147.08	256.654	0.062458	0.781827	63.3447
472	7148.83	217.979	6170.86	262.981	0.0591837	0.782111	64.6376
473.5	7180.83	204.285	6179.35	276.259	0.0647521	0.782609	64.4156
475	7210.06	209.387	6211.25	280.278	0.0627077	0.782918	64.2232
476.5	7240.23	211.172	6241.71	267.353	0.0613408	0.78324	63.9395
478	7271.06	207.498	6275.32	281.69	0.0607123	0.783612	63.6197
479.5	7302.21	201.175	6308.6	267.142	0.0646304	0.784017	63.197
481	7331.45	197.442	6344.14	273.641	0.0630023	0.784458	65.0183
482.5	7361.43	203.641	6344.63	277.329	0.0661906	0.784784	64.6969
484	7389.96	210.313	6378.17	293.069	0.0583625	0.785109	64.4368
485.5	7422.3	200.806	6412.52	249.532	0.0618991	0.785442	63.834
487	7452.79	203.161	6452.64	261.49	0.0612685	0.785732	63.0022
488.5	7483.58	202.684	6492.14	252.37	0.0615824	0.786051	63.6698
490	7514.2	196.251	6510.13	252.65	0.0607683	0.786305	64.3142
491.5	7545.22	197.95	6528.01	257.946	0.0632871	0.786615	63.9831
493	7575	200.656	6561.15	269.469	0.0628442	0.786739	63.3984
494.5	7604.99	191.555	6599.15	269.166	0.0619298	0.786905	64.0801
496	7635.42	205.73	6618.53	233.886	0.0649663	0.787319	63.8001
497.5	7664.41	212.681	6650.51	246.688	0.0576477	0.78753	63.81
499	7697.07	205.703	6677.24	229.626	0.0573654	0.787885	62.5833
500.5	7729.89	194.351	6723.84	235.924	0.0618771	0.788317	64.7938
502	7760.3	192.675	6718.47	243.292	0.0635438	0.788427	63.7768
503.5	7789.9	191.043	6765.04	233.594	0.0604037	0.788135	63.6221
505	7821.06	190.468	6797.37	227.48	0.0615833	0.787881	63.6906
506.5	7851.64	194.412	6825.7	233.437	0.0617889	0.787795	63.2921
508	7882.12	196.425	6861.39	215.728	0.0599754	0.787886	62.9853
509.5	7913.52	191.854	6895.72	225.753	0.0600119	0.787779	63.8673
511	7944.91	194.044	6911.11	220.703	0.0632033	0.78757	63.4777
512.5	7974.72	206.74	6947.39	235.725	0.0576357	0.787625	63.1653
514	8007.41	210.975	6983.11	199.435	0.0559437	0.787275	63.0977
515.5	8041.11	207.493	7014.81	214.782	0.0571407	0.787213	63.8268
517	8074.11	200.37	7032.11	215.388	0.0599985	0.78677	63.448
518.5	8105.55	205.034	7068.55	218.137	0.059219	0.786478	64.6646
520	8137.43	202.59	7079.69	210.869	0.0585019	0.786209	62.5338
521.5	8169.7	205.7	7144.14	222.012	0.0633428	0.785442	63.0429
522.99	8199.35	220.217	7168.14	201.357	0.0569937	0.784717	63.037
524.5	8232.77	213.876	7199.73	208.65	0.0559163	0.784278	63.5537
526	8266.63	195.674	7221.96	210.235	0.0596585	0.78368	63.0664
527.5	8298.4	217.538	7261.21	212.247	0.0653782	0.782853	63.3825
529	8327.41	228.289	7288.22	199.234	0.0571713	0.781799	63.7486
530.5	8360.64	228.289	7314.06	202.819	0.0550794	0.780816	63.6041
532	8395.18	221.921	7347.22	192.564	0.0565794	0.779786	63.6941
533.5	8428.85	213.71	7376.42	215.33	0.0592011	0.778644	63.215
535	8461.08	209.385	7416.76	200.378	0.0622385	0.777495	62.0311
536.5	8491.78	217.269	7468.22	204.353	0.058068	0.776405	63.3548
538	8524.74	221.729	7479.14	204.129	0.0598294	0.775277	63.7571
539.5	8556.78	223.721	7504.89	195.741	0.0587159	0.774051	63.0372
541	8589.47	224.416	7549.01	198.157	0.058817	0.772853	63.3827
542.5	8622.17	227.459	7575.02	200.657	0.0595241	0.771664	63.143
544	8654.52	258.072	7610.42	189.906	0.0532777	0.770223	62.7944
545.5	8690.75	234.717	7647.69	213.497	0.0593932	0.768774	62.8181
547	8723.3	234.161	7679.92	211.925	0.0605945	0.767341	62.0297
548.5	8755.27	238.301	7728.11	194.449	0.0605267	0.765864	59.8756
550	8787.34	238.318	7793.71	190.833	0.059582	0.764364	59.7806
551.5	8819.99	239.093	7828.21	190.372	0.0633315	0.762843	59.6858
553	8850.77	254.971	7862.19	196.231	0.0577241	0.761295	59.5907
554.5	8884.61	249.318	7896.54	196.565	0.0567011	0.759732	59.4955
556	8919.13	235.213	7931.51	186.862	0.0647168	0.758134	59.4007
557.5	8949.44	254.927	7965.41	205.035	0.0578893	0.756517	59.3055
559	8983.4	252.215	8000.98	211.55	0.0582571	0.754859	59.2103
560.5	9017.23	240.108	8038.42	208.203	0.0619752	0.753182	59.4176
562	9049.1	242.25	8070.28	199.792	0.0617195	0.7515	59.7758
563.5	9081.17	246.165	8098.39	204.038	0.0556636	0.749784	60.1335
565	9116.82	225.409	8126.68	207.974	0.0606399	0.748091	60.4915
566.5	9149.62	232.982	8155.29	193.637	0.0661357	0.746423	60.8498
568	9179.76	232.254	8182.94	216.773	0.0624802	0.744728	61.2077
569.5	9211.74	225.637	8210.71	222.602	0.0582319	0.743087	61.5653
571	9246.14	228.117	8240.44	210.84	0.065116	0.741401	61.9232
572.5	9276.97	234.849	8270.45	193.465	0.0636143	0.739754	61.946
574	9308.6	242.986	8303.61	222.027	0.0570232	0.737919	61.8008
575.5	9343.97	240.965	8338.4	231.179	0.0595257	0.736213	61.6558
577	9377.94	241.094	8377.07	226.155	0.0598231	0.734498	61.5108
578.5	9411.82	241.029	8416.08	217.034	0.0587726	0.732867	61.3657
580	9446.39	236.9	8453.41	207.316	0.0591302	0.731244	61.2206
581.5	9480.83	235.82	8488.8	216.865	0.060898	0.729634	61.0756
583	9514.34	239.29	8526.1	221.913	0.0614608	0.727888	60.9307
584.5	9547.63	232.909	8562.9	224.083	0.0605151	0.725923	61.1237
586	9581.53	229.355	8595.22	224.488	0.0648007	0.724007	61.4861
587.5	9613.28	238.979	8624.77	227.746	0.0645153	0.722026	61.8483
589	9645.25	233.651	8654.15	258.333	0.0612288	0.719855	62.2102
590.5	9679.05	232.527	8687.34	234.864	0.0665505	0.71766	62.5723
592	9710.24	241.99	8717.61	233.557	0.0639848	0.71533	62.9335
593.5	9742.79	253.504	8747.33	236.711	0.0616247	0.712927	63.2917
595	9776.71	249.833	8777.2	242.692	0.0590333	0.710716	63.6503
596.5	9812.22	244.689	8807.22	229.75	0.0644412	0.708552	63.825
598	9844.86	255.952	8839.08	253.056	0.0623864	0.70621	63.9282
599.5	9878.69	249.244	8873.58	258.708	0.0596172	0.703681	64.0326
601	9914.21	249.855	8910	227.698	0.0650697	0.701208	64.1361
602.5	9946.88	249.364	8943.24	255.064	0.0619527	0.6991	64.2408
604.02	9981.76	248.69	8978.4	254.289	0.0637278	0.697091	64.3454
605.5	10014.9	247.98	9013.15	239.875	0.0647755	0.695291	64.4494
607	10048	265.905	9046.25	241.766	0.0616059	0.693615	64.555
608.5	10082.9	271.182	9079.13	247.354	0.0602519	0.692055	64.5508
610	10118.6	272.16	9117.09	225.253	0.0595839	0.690373	63.7742
611.5	10154.9	266.3	9162.99	236.159	0.0619177	0.689025	62.8864
613	10189.8	260.993	9209.01	225.441	0.0618132	0.687601	61.9984
614.5	10224.9	261.284	9258.07	228.977	0.0673937	0.686281	61.1089
616	10257.2	268.374	9303.99	243.249	0.061302	0.68506	60.2207
617.5	10292.7	255.618	9354.68	240.353	0.0648399	0.683798	59.3313
619	10326.3	262.38	9404.26	241.932	0.0615837	0.682871	58.4426
620.5	10361.8	260.872	9454.08	235.981	0.0648184	0.682141	58.1771
622	10395.5	258.058	9493.41	235.745	0.0620063	0.681534	58.2246
623.5	10430.9	259.751	9526.97	241.43	0.0641633	0.681072	58.2719
625	10465	252.398	9560.44	227.622	0.0629058	0.680386	58.3198
626.5	10499.9	272.484	9593.75	230.359	0.0647859	0.679866	58.3675
628	10533.7	237.211	9625.6	244.42	0.059502	0.679555	58.4169
629.5	10570.7	262.169	9657.99	226.67	0.0691207	0.678985	58.4641
631	10602.5	249.221	9695.77	237.177	0.0615967	0.678719	58.5136
632.5	10638.2	253.527	9727.29	247.659	0.064889	0.678683	58.5624
634	10672.1	248.722	9759.86	259.939	0.0632391	0.678745	58.612
635.5	10706.8	241.888	9793.7	239.646	0.0640852	0.678729	58.6616
637	10741.2	243.161	9827.12	248.743	0.0653128	0.679205	58.7111
638.5	10774.8	243.657	9858.91	261.663	0.0636316	0.679724	58.7614
640	10809.4	244.77	9891.91	240.937	0.063136	0.680634	58.8122
641.5	10844.1	245.556	9924.46	253.952	0.0614448	0.681702	58.8637
643	10879.8	239.518	9955.43	247.615	0.0646854	0.682817	58.9146
644.5	10913.6	227.002	9987.4	248.921	0.0619792	0.684221	59.2827
646	10948.8	232.085	10013.5	247.082	0.0652826	0.685762	59.8084
647.5	10982.2	228.373	10036.6	261.95	0.0624067	0.687146	60.3357
649	11017	229.651	10060.5	270.286	0.0641829	0.688631	60.863
650.5	11050.8	229.799	10085	271.266	0.061572	0.690295	61.392
652	11086	245.862	10109.6	275.528	0.0647371	0.692044	61.9204
653.5	11119.3	257.114	10134.3	266.311	0.0567601	0.694002	62.4528
655	11157.2	244.368	10158.5	266.299	0.0597819	0.695791	62.9847
656.5	11193.2	239.044	10182.3	267.673	0.0615019	0.697368	63.4863
658	11228	229.138	10206.8	245.96	0.0625722	0.698942	63.7767
659.5	11262.2	219.277	10234	269.001	0.0663939	0.700662	64.0358
661	11294.3	230.646	10260.3	268.289	0.0683551	0.702323	64.2948
662.5	11325.5	238.694	10289	253.864	0.0608309	0.703879	64.5572
664	11360.4	229.799	10316.4	266.923	0.0639863	0.705309	64.8182
665.5	11393.5	227.463	10344.8	253.863	0.0617151	0.706693	65.0818
667	11427.8	235.654	10373.2	265.588	0.0649747	0.708002	65.3439
668.5	11460.3	253.555	10401.1	256.181	0.0623374	0.709242	65.3835
670	11494.1	255.643	10433.7	260.099	0.0569398	0.710393	65.314
671.5	11531.1	259.869	10467.4	251.818	0.0584535	0.711415	65.244
673	11567.1	256.02	10501.8	273.697	0.0553222	0.712373	65.176
674.5	11605	227.565	10535.5	235.236	0.0669339	0.713269	65.1026
676	11636.3	233.837	10572	263.214	0.0661055	0.714105	65.0296
677.5	11668	252.049	10603.9	248.543	0.0663009	0.714875	64.9568
679	11699.6	267.963	10639.6	253.737	0.0622194	0.715591	64.8862
680.5	11733.2	286.687	10673.6	248.478	0.0600225	0.716244	64.577
682	11768	282.752	10712.5	240.766	0.0639879	0.716846	64.1462
683.5	11800.6	308.406	10752.8	244.131	0.0649456	0.717418	63.7148
685	11832.8	317.361	10793	243.267	0.059103	0.717971	63.2883
686.5	11868	319.17	10833.9	247.03	0.0604526	0.718504	62.8568
688	11902.5	315.381	10875.9	240.951	0.0602169	0.719004	62.4272
689.5	11937.1	309.208	10916.3	226.006	0.0590352	0.719498	61.9982
691	11972.3	345.227	10957.5	233.716	0.0647946	0.719957	61.5606
692.5	12004.4	321.802	10997.9	224.953	0.0569782	0.720375	61.2024
694	12040.9	339.849	11037.5	234.712	0.0628048	0.720765	61.4895
695.5	12073.9	347.057	11066.8	223.892	0.0571564	0.721102	61.8696
697	12110.3	350.35	11094.5	255.672	0.0594302	0.721368	62.2493
698.5	12145.2	373.439	11121.7	257.254	0.0572928	0.721609	62.6293
700	12181.4	390.912	11152.3	245.27	0.0560466	0.721755	63.0095
701.5	12218.5	396.209	11181.7	239.865	0.0566622	0.721854	63.3895
703	12255.1	410.988	11210.4	237.805	0.0550035	0.721941	63.7697
704.5	12292.8	398.151	11238.5	223.957	0.0568045	0.721789	63.6394
706	12329.3	403.198	11274.3	216.879	0.050411	0.72162	63.2551
707.5	12370.5	434.507	11312.1	242.84	0.0569934	0.721868	62.8692
709	12406.9	413.938	11351.5	230.66	0.0513017	0.722047	62.4839
710.5	12447.4	408.7	11390.9	226.849	0.0543101	0.722164	62.0976
712	12485.6	420.875	11431.2	236.459	0.0537088	0.722225	61.7111
713.5	12524.2	437.746	11470	259.253	0.0510295	0.722242	61.3237
715	12564.9	425.925	11511.6	253.026	0.0493995	0.722165	60.9371
716.51	12607.2	437.249	11555.2	268.318	0.0508169	0.722611	60.6599
718	12647.7	441.265	11596.6	225.538	0.0487039	0.722746	60.9679
719.5	12690.3	438.702	11624.6	232.258	0.0484747	0.722783	61.361
721	12733.1	440.331	11650.1	235.675	0.0490426	0.722817	61.7536
722.5	12775.4	453.824	11675.7	259.017	0.047565	0.722858	62.1776
724	12819	465.968	11700.8	268.419	0.0446866	0.722746	62.6147
725.5	12865.4	456.731	11727.5	288.316	0.050207	0.722613	63.0522
727	12906.8	447.489	11755	280.472	0.0455307	0.722504	63.4852
728.5	12952.4	436.475	11781.8	285.152	0.0464463	0.722324	63.8296
730	12997.1	444.981	11809.1	318.804	0.0476811	0.72214	63.5394
731.5	13040.6	441.445	11847.2	316.479	0.0448717	0.721908	63.1565
733	13086.9	425.627	11888.9	321.865	0.0490706	0.721659	62.7689
734.5	13129.3	450.178	11930.2	302.196	0.0457496	0.721344	62.3763
736	13174.7	468.06	11972.4	345.342	0.0432897	0.721103	61.9833
737.5	13222.8	454.03	12011.8	316.366	0.0449556	0.720864	61.5871
739	13269.1	446.372	12054.2	350.601	0.0461192	0.720611	61.5866
740.5	13314.2	451.168	12089	344.363	0.0458216	0.720229	62.3845
742	13359.7	461.426	12111.9	350.8	0.0444225	0.719908	63.1816
743.5	13406.6	420.361	12133.9	370.403	0.0500946	0.719618	63.9756
745	13448.2	433.769	12156.4	376.44	0.0485663	0.719317	64.7679
746.5	13491.1	432.084	12179.3	390.734	0.0490191	0.719009	65.5591
748	13533.7	422.375	12202.7	392.683	0.0513171	0.718749	66.3488
749.5	13574.3	456.065	12226.1	397.915	0.0468444	0.718513	67.1387
751	13618.9	451.486	12249.2	414.256	0.0480533	0.71835	67.7808
752.5	13662.4	462.18	12275.4	399.635	0.0471326	0.718162	67.3895
754	13706.7	462.332	12319.7	395.854	0.0465981	0.718017	66.8488
755.5	13751.5	437.524	12370.6	434.533	0.0512278	0.717967	66.3055
757	13792.3	450.29	12417.6	407.911	0.0501786	0.717958	65.7597
758.5	13833.9	471.288	12467.4	409.23	0.0465557	0.718098	65.2133
760	13878.8	463.755	12515.7	440.213	0.0468579	0.718274	64.6647
761.5	13923.4	465.027	12566.4	425.493	0.0479544	0.718628	64.1139
763	13966.9	455.597	12618.5	440.51	0.0477488	0.71902	63.698
764.5	14010.6	464.409	12667.6	441.778	0.0495775	0.719794	63.5785
766	14052.6	492.52	12711.3	435.856	0.0468419	0.7205	63.4479
767.5	14097.1	500.542	12755.3	444.883	0.0424113	0.718829	63.1402
769	14146.3	451.264	12807.8	468.191	0.0495294	0.717227	62.8525
770.5	14188.5	434.52	12863	457.281	0.0486977	0.715689	62.5612
772	14231.5	461.916	12913.6	445.956	0.0529078	0.714221	62.28
773.5	14271.2	459.052	12967.8	432.693	0.0486313	0.712819	61.9872
775	14314.5	453.088	13020.7	454.912	0.0496277	0.711477	61.6963
776.5	14357	436.685	13074.7	418.385	0.0504581	0.710049	61.6306
778	14398.8	435.205	13121.9	446.385	0.0546288	0.70879	61.686
779.5	14437.6	443.541	13168	470.118	0.0501485	0.707603	61.7295
781	14479.9	414.248	13217	455.15	0.0559832	0.706515	61.7866
782.5	14517.8	410.946	13264.4	445.96	0.0546773	0.705463	61.8406
784	14556.7	429.406	13310.4	449.973	0.0567252	0.704467	61.8987
785.5	14594.2	440.772	13356.5	464.463	0.053074	0.703584	61.9478
787	14634.4	433.981	13403.9	419.458	0.0513748	0.702776	61.9917
788.5	14675.9	456.719	13446.3	433.805	0.0535734	0.702047	62.0925
790	14715.8	437.799	13488.5	432.964	0.0492551	0.70129	62.2058
791.5	14759.2	436.481	13530.1	419.022	0.0535557	0.700555	62.3293
793	14799.2	415.453	13569.9	456.791	0.0579466	0.699834	62.4612
794.5	14836.2	435.242	13612.6	449.859	0.0544499	0.69909	62.5824
796	14875.6	433.519	13655.1	460.815	0.055748	0.69835	62.7041
797.5	14914.1	446.44	13698.1	468.899	0.0545538	0.69762	62.8194
799	14953.5	456.202	13741.8	435.338	0.0525338	0.696868	62.9255
800.5	14994.5	452.348	13782.8	444.575	0.053867	0.696106	62.7571
802	15034.5	446.879	13828.8	472.153	0.0548361	0.695317	62.4529
803.5	15073.9	465.208	13881	463.378	0.0569672	0.694528	62.2025
805	15111.8	474.465	13932	465.364	0.0517174	0.693722	61.9467
806.5	15153.6	479.327	13982.2	451.302	0.0543003	0.692882	61.694
808	15193.4	488.92	14031.7	474.163	0.0530981	0.692049	61.4399
809.5	15234.3	469.073	14081.7	518.009	0.0526236	0.691114	61.1856
811	15275.5	473.796	14136.9	455.351	0.0580207	0.690105	60.9392
812.5	15313	501.26	14187	433.545	0.0536148	0.689042	60.6933
814	15353.6	522.487	14236.3	464.944	0.0515003	0.687906	60.4749
815.5	15395.9	495.787	14282.7	457.111	0.0495674	0.686679	60.2596
817	15440	528.435	14332.1	450.86	0.0540171	0.685435	60.0522
818.5	15480.5	517.991	14380.4	423.364	0.0496578	0.684195	59.8415
820	15524.6	512.548	14426.1	452.699	0.0532506	0.682892	59.6379
821.5	15565.9	518.529	14473.5	414.825	0.0529653	0.681539	59.4374
823	15607.5	517.382	14517.6	410.84	0.053101	0.680124	59.2397
824.5	15649	512.807	14561.9	431.897	0.0557009	0.678564	59.2115
826	15688.7	540.026	14602.8	443.136	0.0548108	0.676987	59.2563
827.5	15729.1	557.075	14645	430.895	0.0494207	0.677332	59.4112
829	15773.9	538.412	14682.8	462.471	0.0555062	0.677665	59.5653
830.5	15813.8	562.995	14719.7	434.884	0.0526248	0.677943	59.7226
832	15855.8	576.508	14759.5	436.494	0.0510841	0.678167	59.8823
833.5	15899.1	565.198	14796.3	413.524	0.0510145	0.678329	60.0431
835	15942.5	565.379	14830.5	436.037	0.0545303	0.678421	60.2016
836.5	15983	576.434	14866.6	430.96	0.0511565	0.678465	60.3476
838	16026.2	564.43	14902.7	441.25	0.0533235	0.678436	60.4831
839.5	16067.7	573.324	14939.5	457.999	0.0538462	0.678364	60.6194
841	16108.8	598.812	14977.5	453.131	0.0496352	0.678254	60.7613
842.5	16153.3	561.805	15015.5	451.38	0.0547398	0.678105	60.8966
844	16193.7	579.458	15053	442.49	0.0530622	0.677955	61.0302
845.5	16235.4	622.982	15089.6	482.415	0.0565352	0.678104	61.1566
847	16274.6	629.124	15126.5	469.164	0.0490026	0.678224	61.2969
848.5	16319.7	667.062	15164.9	483.591	0.0462365	0.678342	61.3742
850	16367.5	624.017	15203.4	490.787	0.0513342	0.678434	60.9828
851.5	16410.6	670.819	15251.5	456.924	0.0471429	0.678499	60.537
853	16457.5	673.345	15298.6	490.05	0.048918	0.678575	60.089
854.5	16502.7	717.904	15346.1	527.179	0.0453366	0.678609	59.6512
856	16551.4	707.239	15396.5	495.413	0.0451381	0.678636	59.2159
857.5	16600.4	699.169	15448.5	534.876	0.0493242	0.678611	58.7774
859	16645.2	739.237	15498.5	508.481	0.046807	0.678594	58.3483
860.5	16692.4	702.877	15549.5	516.427	0.0448061	0.678224	58.2469
862	16741.8	701.745	15593.5	522.075	0.0520574	0.677801	58.2966
863.5	16784.3	759.792	15634.8	508.209	0.0483592	0.6774	58.359
865	16830.1	794.238	15674.6	521.085	0.0444164	0.676947	58.4338
866.5	16880	773.414	15714.1	574.217	0.0427913	0.67653	58.516
868	16931.8	736.691	15756.3	525.932	0.0457896	0.676154	58.5952
869.5	16980.2	712.224	15797.3	555.051	0.0433759	0.675858	58.6845
871	17031.4	754.192	15837.3	574.323	0.0480346	0.675568	58.7659
872.5	17077.6	764.089	15878.9	579.224	0.0438823	0.675284	58.832
874	17128.3	770.074	15921.4	549.726	0.0437266	0.674995	58.6988
875.5	17179.1	789.555	15966.2	583.044	0.0394463	0.674774	58.5509
877	17235.4	798.71	16011.6	565.194	0.0418236	0.674518	58.3967
878.5	17288.6	797.881	16056.9	562.83	0.0408095	0.674258	58.2466
880	17343.1	787.06	16101.3	606.05	0.0407757	0.673993	58.0847
881.5	17397.7	767.075	16148.9	559.968	0.0437056	0.673808	57.9539
883	17448.6	744.455	16192.4	578.058	0.042088	0.673628	57.8965
884.5	17501.5	776.501	16235.4	622.979	0.0437435	0.673518	57.8551
886	17552.4	802.692	16275.6	629.282	0.040461	0.673478	58.0085
887.5	17607.5	806.28	16317.7	669.444	0.0400278	0.672977	58.1907
889	17663.2	800.668	16362.4	616.955	0.0406375	0.672519	58.3701
890.5	17718.1	790.345	16403.3	673.197	0.0412165	0.672132	58.5471
892	17772.2	802.703	16446.5	659.159	0.0424679	0.671796	58.718
893.5	17824.8	859.106	16489.2	714.326	0.0397957	0.671479	58.9017
895	17880.9	901.873	16533.5	726.108	0.0364103	0.671175	59.1043
896.5	17942.3	899.593	16578.5	678.68	0.0366845	0.670898	59.2983
898	18003.2	893.374	16621.8	719.251	0.0369503	0.670593	59.4463
899.5	18063.8	887.043	16665.2	756.333	0.0374623	0.670314	59.5784
901	18123.5	889.831	16711	666.429	0.0356975	0.670008	59.71
902.5	18186.2	885.9	16755.8	717.788	0.037385	0.669711	59.8222
904	18246.1	908.762	16797.6	779.414	0.0375998	0.669195	59.8334
905.5	18305.8	941.881	16845.4	801.22	0.0363512	0.667529	59.251
907	18367.6	946.274	16912.7	747.087	0.0345983	0.665872	58.6365
908.5	18432.7	937.326	16978.8	711.048	0.035232	0.66428	58.0283
910	18496.8	922.38	17045.4	765.64	0.0356637	0.662688	57.4327
911.5	18560.2	896.32	17109.4	762.563	0.0375037	0.661081	56.8616
913	18620.7	885.899	17176	789.059	0.0392957	0.659361	56.3118
914.5	18678.6	910.038	17248.6	800.842	0.0383494	0.657679	55.7509
916	18738.1	925.239	17318.9	795.64	0.037426	0.655984	55.1785
917.5	18799.2	938.417	17390.6	770.245	0.0378254	0.654308	54.6112
919	18859.8	1000.62	17458.1	740.266	0.034708	0.652625	54.0621
920.5	18926	1035.26	17525.9	796.806	0.0332101	0.651957	54.0366
922	18995.3	1040.08	17580.7	808.96	0.0340542	0.651321	54.0454
923.5	19062.9	1002.96	17637.2	803.311	0.0331506	0.650716	54.0547
925	19132.5	964.994	17693.4	797.598	0.0348596	0.650052	54.0721
926.5	19198.7	1012.73	17748.8	781.321	0.036603	0.649388	54.0966
928	19261.8	1012.23	17802.7	830.517	0.033425	0.648703	54.1187
929.5	19331	994.545	17858.2	902.395	0.0338844	0.648046	54.1462
931	19399.3	973.556	17918.2	901.016	0.0390498	0.647403	54.1868
932.5	19458.6	936.104	17979.7	897.389	0.0347109	0.64682	53.9911
934	19525.4	910.765	18046.7	885.974	0.0368064	0.646186	53.6873
935.5	19588.5	903.955	18115.9	890.31	0.0376631	0.64557	53.388
937	19650.2	914.927	18187.6	885.814	0.036196	0.644975	53.0901
938.5	19714.4	860.519	18256.4	912.785	0.0362782	0.644405	52.7955
940	19778.6	911.498	18325.5	953.504	0.0410064	0.643849	52.5079
941.5	19835.4	944.84	18397.6	941.111	0.03533	0.643338	52.2172
943	19901.4	922.018	18471.4	933.141	0.0368975	0.642775	51.9307
944.5	19964.6	958.478	18544.2	902.257	0.0345596	0.642268	51.9534
946	20032.2	914.483	18605.9	879.451	0.0387586	0.641843	52.1353
947.5	20092.5	929.872	18660.8	903.288	0.0377687	0.641346	52.1271
949	20154.4	1004.03	18721	926.053	0.0343609	0.64085	52.0236
950.5	20222.6	954.814	18785.4	922.989	0.0366273	0.640328	51.9243
952	20286.5	970.251	18849.8	994.851	0.0386832	0.63982	51.829
953.5	20347.1	1000.44	18918.9	1034.53	0.0359789	0.639259	51.737
955	20412.3	1010.14	18991.9	1041.94	0.0358463	0.638672	51.6479
956.5	20477.9	998.822	19063.6	1002.61	0.0370925	0.638132	51.5615
958	20541.2	1007.09	19136.8	962.658	0.0371958	0.637601	51.2426
959.5	20604.5	997.916	19212.5	1023.88	0.037172	0.637048	50.4545
961	20667.8	943.953	19301.4	1002.87	0.0377856	0.636547	49.6608
962.5	20730.2	1025.74	19394.2	976.76	0.0409747	0.63605	48.8597
964	20787.7	1020.37	19477.4	924.217	0.0361385	0.635518	48.0602
965.5	20853.1	1103.76	19565.6	899.485	0.0368121	0.635292	47.263
967	20917.2	1033.77	19649.1	915.826	0.032967	0.635034	46.4685
968.5	20988.8	1052.22	19735.4	842.738	0.0365314	0.634858	46.4676
970	21053.5	1110.44	19797.5	941.646	0.0352552	0.634741	46.8649
971.5	21120.6	1116.74	19846.5	945.778	0.0330046	0.634584	47.2755
973	21192.2	1110.21	19901.4	922.004	0.0332937	0.634417	47.7278
974.5	21263.2	1019.56	19952.9	974.552	0.0368978	0.634456	48.2147
976	21327.3	1007.57	20005.6	902.528	0.0375666	0.634466	48.7073
977.5	21390.2	1023.77	20056.2	925.272	0.0363056	0.634497	49.2127
979	21455.3	990.368	20103.9	931.31	0.0384006	0.634631	49.7048
980.5	21516.9	1024.99	20152.6	1005.43	0.0364461	0.634345	50.2367
982	21581.7	1026.73	20205.9	964.577	0.0352416	0.634015	50.7662
983.5	21648.9	989.662	20257.2	934.518	0.0332078	0.633977	51.3068
985	21720.1	940.834	20305.6	993.565	0.0361759	0.633945	51.8227
986.5	21785.5	1013.82	20353.5	1001.5	0.0382409	0.634024	52.3243
988	21847.4	986.432	20404.7	1012.68	0.0333215	0.633983	52.8642
989.5	21918.4	937.128	20455.4	995.772	0.0364232	0.634054	53.3781
991	21983.4	926.162	20505.6	1002.58	0.0368839	0.634053	53.8883
992.5	22047.5	933.907	20555.2	1008.86	0.0355005	0.633961	54.1843
994	22114.1	935.193	20610.8	996.515	0.0357171	0.63352	54.2369
995.5	22180.4	898.295	20673.6	938.594	0.0351774	0.633131	54.281
997	22247.8	886.513	20735.3	1033.6	0.0374284	0.632676	54.3225
998.5	22311.1	894.386	20793.5	1018.93	0.0372889	0.63214	54.3652
1000	22374.8	913.003	20858.8	1111.89	0.0375693	0.631352	54.4089
1001.5	22438	984.263	20924.3	1024.26	0.0357382	0.630725	54.495
1003	22504.5	1018.1	20994.4	1054.63	0.0357536	0.630098	54.6088
1004.5	22571.1	1059.31	21057.6	1114.28	0.0351173	0.629439	54.7496
1006	22639	1030.75	21122.4	1116.82	0.0358483	0.628739	54.8968
1007.5	22705.5	1051.16	21191.4	1111.21	0.0377587	0.628399	55.0404
1009	22768.8	1089.39	21259.1	1020.61	0.0361848	0.627786	55.1896
1010.5	22834.8	1067.61	21321	1004.8	0.034897	0.627359	55.3431
1012	22903.3	1042.48	21381	1031.14	0.0375247	0.627054	55.4876
1013.5	22967.1	1065.65	21442.6	981.938	0.0364039	0.626674	55.6351
1015	23032.8	1084.73	21501.9	1021.16	0.03706	0.626383	55.7778
1016.5	23097.4	1005.68	21562.8	1036.74	0.0351956	0.625854	55.4935
1018	23165.5	1029.24	21638.5	996.741	0.0387233	0.625808	54.9792
1019.5	23227.4	1004.75	21724.2	938.037	0.0366291	0.625687	54.4699
1021	23292.9	979.372	21802.8	1035.17	0.039062	0.625328	53.9497
1022.5	23354.3	964.702	21883.6	946.915	0.0390893	0.625349	53.4301
1024	23415.6	952.286	21965.5	923.904	0.0403789	0.625247	52.9068
1025.5	23475.1	965.502	22044.1	933.841	0.0398758	0.62508	52.3866
1027	23535.2	984.38	22125.4	935.41	0.0384901	0.624986	51.8728
1028.5	23597.6	968.713	22206.5	880.732	0.0381109	0.624911	51.496
1030	23660.6	899.913	22282.4	891.358	0.0422591	0.624621	52.0422
1031.5	23717.4	933.954	22332.1	896.593	0.0402444	0.624161	52.7391
1033	23777.1	984.949	22378.2	914.336	0.0381844	0.624058	53.5201
1034.5	23840.1	969.886	22421.2	976.444	0.0392747	0.624205	54.3124
1036	23901.2	1021.61	22464.5	996.574	0.0400567	0.623964	55.1147
1037.5	23961.3	1049.18	22509.5	1020.73	0.0373141	0.623756	55.9443
1039	24025.7	1075.46	22553.6	1060.95	0.0368183	0.623315	56.7919
1040.5	24091.1	1069.28	22598.3	1056.77	0.0373363	0.623058	57.0742
1042	24155.6	1139.83	22658.5	1018.28	0.0381166	0.622954	57.0673
1043.5	24218.7	1118.62	22724.5	1064.4	0.03435	0.622237	56.905
1045	24288.9	1105.77	22794.8	1104.09	0.0366241	0.621531	56.5373
1046.5	24354.8	1125.43	22874.1	1031.76	0.0354299	0.620644	56.1501
1048	24423	1109.47	22952.2	1060.43	0.034982	0.619879	55.7502
1049.5	24492.2	1061.41	23030.2	1087.86	0.0376399	0.618985	55.3354
1051	24556.6	1111.18	23108.7	991.897	0.0365585	0.61866	54.9823
1052.5	24622.9	1082.64	23185.5	1042.38	0.0349151	0.618127	54.8038
1054	24692.4	1036.16	23254.7	980.283	0.0356597	0.617431	54.6844
1055.5	24760.5	1032.74	23323	978.653	0.0376654	0.616952	54.5657
1057	24825.1	1060.56	23388.5	949.45	0.0361438	0.616569	54.4449
1058.5	24892.4	1068.97	23452.5	956.133	0.0351369	0.615824	54.3132
1060	24961.7	1020.16	23517.3	983.057	0.0353433	0.615285	54.1752
1061.5	25030.7	1004.61	23583.7	987.956	0.0386477	0.614852	54.0397
1063	25093.8	1056.58	23651.1	894.408	0.0358966	0.614149	53.9025
1064.5	25161.8	1060.11	23713.5	930.526	0.0340009	0.613068	53.8595
1066	25233.8	985.877	23776.3	985.167	0.0373769	0.612333	54.4997
1067.5	25299.3	968.552	23824.5	971.673	0.0397522	0.611804	55.2416
1069	25361	1008.28	23868.7	966.603	0.0366023	0.611213	55.9821
1070.5	25428.1	970.221	23912.6	1040.77	0.0387706	0.610142	56.5265
1072	25491.5	985.762	23961.7	1049.26	0.0384034	0.60916	57.0461
1073.5	25555.6	1016.75	24015	1075.88	0.0372041	0.608406	57.6807
1075	25621.9	1006.12	24065.2	1073.91	0.0349342	0.607477	58.302
1076.5	25692.5	956.832	24116.1	1064.8	0.0393178	0.606759	58.806
1078	25755.4	981.422	24169	1165.39	0.0381218	0.605727	58.3747
1079.5	25820.4	956.984	24248.7	1090.43	0.0362323	0.604676	57.9568
1081	25888.9	941.806	24330.9	1121.77	0.03741	0.603643	57.883
1082.5	25955.3	939.279	24403	1132.79	0.0379767	0.602832	57.8303
1084	26020.8	966.211	24475.5	1048.4	0.0366315	0.602029	57.3197
1085.5	26088.8	944.059	24556.2	1111.33	0.0371483	0.601209	56.854
1087	26156	972.434	24637.7	1076.28	0.0378751	0.600363	56.4013
1088.5	26221.9	988.856	24721.4	1014.89	0.0350288	0.600582	56.0168
1090	26293.2	878.723	24797.4	1049.58	0.0400156	0.601147	56.0626
1091.5	26355.6	913.643	24860.9	1074.78	0.0373128	0.601638	56.1325
1093	26422.4	846.566	24926.1	1062.75	0.0365115	0.601002	56.0679
1094.5	26490.8	815.669	24998.6	976.04	0.0397674	0.600318	55.9896
1096	26553.6	859.675	25068.1	1037.93	0.0411689	0.599686	55.9197
1097.5	26614.4	878.149	25137.6	1088.32	0.0366714	0.599194	55.8251
1099	26682.6	872.377	25212.2	1001.49	0.0369106	0.598681	55.7839
1100.5	26750.5	875.228	25282	951.019	0.0389514	0.598097	55.7579
1102	26814.9	869.596	25346.7	1016.43	0.0361599	0.597286	55.2544
1103.5	26884.3	853.802	25427.9	970.191	0.0360716	0.596385	54.6873
1105	26954.1	869.352	25507.9	989.799	0.0366029	0.595146	54.1239
1106.5	27022.9	890.251	25590.4	1036.46	0.0348833	0.59368	53.5577
1108	27095.4	904.878	25678.6	951.374	0.0335288	0.592311	53.0409
1109.5	27170.9	894.31	25759	982.833	0.0359227	0.590797	52.5755
1111	27241.6	813.063	25840.4	948.55	0.0327467	0.589283	52.5103
1112.5	27319.3	854.194	25913.5	938.376	0.0364616	0.587768	53.2517
1114	27389.3	836.066	25964	939.469	0.0335726	0.586398	53.983
1115.5	27465.5	809.3	26014	968.245	0.0346349	0.584959	54.6877
1117	27539.5	804.011	26066.6	952.496	0.0351116	0.58327	55.3764
1118.5	27612.8	800.597	26120.2	932.149	0.0336283	0.581495	56.0619
1120	27689.5	728.772	26173.6	992.247	0.0356602	0.579596	56.7484
1121.5	27762.1	714.198	26227.1	988.494	0.0370619	0.577727	57.4382
1123	27832.1	707.936	26284.5	870.704	0.0368232	0.575949	57.7828
1124.5	27902.8	694.317	26344	925.325	0.036159	0.574196	57.4346
1126	27975.1	660.51	26423.4	845.592	0.0361502	0.572478	57.0905
1127.5	28047.6	654.255	26504	809.774	0.0387307	0.570636	56.7529
1129	28115.4	677.804	26578.5	884.748	0.0371383	0.568677	56.4163
1130.5	28186.5	706.111	26656.1	870.465	0.0354767	0.566751	56.0796
1132	28261.1	718.148	26737.7	876.349	0.0349224	0.564687	55.7434
1133.5	28337.1	693.534	26815.9	869.505	0.034695	0.562497	55.4082
1135	28414	741.074	26899.8	850.249	0.0363746	0.560307	55.0756
1136.5	28487.6	757.284	26983.5	879.709	0.0335664	0.558092	54.7699
1138	28567.7	797.615	27068	902.295	0.0329649	0.555837	54.481
1139.5	28649.5	785.161	27156.7	910.664	0.031014	0.553636	54.1734
1141	28736.9	806.614	27242	812.607	0.0332694	0.551438	53.8514
1142.5	28818.6	756.889	27333.5	861.829	0.0316916	0.549296	53.5262
1144	28904.8	747.026	27419.7	822.034	0.0364046	0.547196	53.2037
1145.5	28980.1	805.893	27509.3	797.125	0.0347958	0.545184	52.8799
1147	29059.2	769.156	27596.7	817.024	0.037786	0.543279	52.7463
1148.5	29132.2	819.082	27681.5	730.373	0.0366692	0.53906	52.2927
1150	29208.1	872.67	27776.6	711.281	0.033127	0.53405	51.4688
1151.5	29292.9	841.306	27879.9	705.059	0.0353449	0.529631	50.8569
1153	29373	826.747	27978.2	659.049	0.0359236	0.528545	51.0694
1154.5	29452	789.499	28047.9	654.232	0.0386708	0.527359	51.2219
1156	29525.6	812.964	28114.9	677.582	0.0379041	0.526112	51.3216
1157.5	29600.8	866.725	28186.4	706.104	0.0351588	0.525037	51.4438
1159	29682.1	842.485	28260.6	718.319	0.0368363	0.524092	51.5848
1160.5	29759.8	914.218	28335.3	692.43	0.0337007	0.523492	51.3061
1162	29844.8	845.167	28420.9	745.374	0.0371623	0.523066	51.0001
1163.5	29922	862.271	28504.9	760.37	0.0365088	0.522821	50.7528
1165	30000.5	859.797	28593	812.677	0.0366556	0.52331	50.7112
1166.5	30078.7	858.387	28676.4	772.041	0.0369726	0.523869	50.73
1168	30156.2	901.803	28760	819.838	0.0352493	0.524515	50.7728
1169.5	30237.3	975.412	28839.8	734.142	0.0316204	0.525158	50.8655
1171	30327.7	961.082	28919.2	749.888	0.0320014	0.525768	51.3538
1172.5	30416.8	983.06	28980.1	805.903	0.0301782	0.526398	52.266
1174	30511.2	981.148	29032.1	757.114	0.0308056	0.526781	52.1873
1175.5	30603.7	968.867	29108.3	791.048	0.0305134	0.527214	52.025
1177	30696.9	870.12	29186.5	882.593	0.0305991	0.52796	51.8064
1178.5	30789.8	865.895	29273	842.943	0.0348582	0.52883	51.5981
1180	30871.1	874.362	29357.7	835.969	0.0334316	0.529895	51.3833
1181.5	30955.8	886.742	29440	786.394	0.0327643	0.531065	51.1613
1183	31042	886.879	29517.3	806.375	0.0317594	0.532033	50.9341
1184.5	31130.8	887.401	29595.9	868.533	0.032054	0.533095	50.7866
1186	31218.6	886.512	29678.1	838.489	0.0312928	0.533923	50.679
1187.5	31308.3	896.772	29756.7	916.846	0.0317422	0.534484	50.649
1189	31396.8	912.643	29840.8	844.203	0.0297477	0.534582	50.691
1190.5	31491.1	887.482	29916.9	862.408	0.0310267	0.534656	50.7384
1192	31581.5	897.545	29993.9	860.318	0.0303801	0.534749	50.7921
1193.5	31673.8	897.315	30070.4	854.354	0.0299931	0.53476	50.8518
1195	31767.4	852.336	30146.2	890.786	0.0318784	0.534734	50.9102
1196.5	31855.3	878.849	30225.2	977.936	0.0307579	0.534653	50.8045
1198	31946.6	904.699	30317.8	958.591	0.0299386	0.53443	50.599
1199.5	32040.3	880.656	30414.3	983.11	0.0314991	0.534153	50.3951
1201	32129.5	878.758	30516.2	981.046	0.0302707	0.53427	50.1919
1202.5	32222.2	822.801	30615.1	967.274	0.0344064	0.534261	49.9928
1204	32303.8	897.316	30714.9	848.741	0.0341025	0.534077	49.7915
1205.5	32386.2	821.433	30811.9	870.961	0.0305583	0.533683	49.5878
1207	32478.1	846.551	30901.4	876.097	0.0362071	0.533062	49.3903
1208.5	32555.9	811.878	30994.4	894.294	0.033861	0.53305	49.2716
1210	32639	824.758	31085.5	880.094	0.0357635	0.533184	49.1852
1211.5	32717.6	823.596	31176.1	894.73	0.0347097	0.532881	49.0946
1213	32798.7	810.169	31268.7	876.79	0.0347491	0.531521	48.9778
1214.5	32879.9	831.247	31365.3	925.541	0.0357084	0.530242	48.8521
1216	32959.2	870.744	31465.7	884.321	0.0328219	0.529045	48.7179
1217.5	33045.5	879.271	31565	896.694	0.032102	0.527864	48.5791
1219	33134.1	850.492	31665	901.848	0.0320048	0.526769	48.5248
1220.5	33223	899.702	31763.5	851.182	0.0331255	0.525682	48.5934
1222	33309.2	842.969	31852.7	878.074	0.0306652	0.524667	48.6557
1223.5	33402.4	816.065	31944.9	905.294	0.0341924	0.52398	48.9536
1225	33486.1	804.369	32030.9	875.289	0.0343265	0.523607	49.5762
1226.5	33569.6	802.758	32102.2	915.935	0.0350862	0.523187	50.1905
1228	33651.3	803.704	32175.3	816.245	0.0353758	0.52277	50.5839
1229.5	33732.4	830.123	32252.5	827.028	0.0334665	0.522342	50.9392
1231	33818.2	808.575	32325.4	926.804	0.0346584	0.521843	51.3131
1232.5	33901.2	815.226	32399.8	797.784	0.0349443	0.520816	51.6628
1234	33983.6	775.18	32483	849.558	0.0343486	0.518875	51.7776
1235.5	34067.7	793.638	32563.3	808.044	0.0363341	0.51689	51.8426
1237	34147.6	890.461	32649.6	827.11	0.0346963	0.51496	51.6153
1238.5	34231.6	873.034	32740.3	822.423	0.0298603	0.513112	51.2623
1240	34329.5	855.755	32836.5	802.252	0.0319092	0.511046	50.9289
1241.5	34421.4	877.626	32931.3	865.506	0.0320074	0.509121	50.6001
1243	34513.5	844.432	33030.5	884.168	0.030798	0.507285	50.2654
1244.5	34609.5	847.62	33134.1	850.471	0.0340285	0.505619	49.9401
1246	34696.7	914.839	33237.4	907.632	0.0321941	0.503878	49.6331
1247.5	34789.2	930.895	33339.7	815.492	0.0296139	0.503157	49.6296
1249	34889.8	900.305	33431.9	816.334	0.0312478	0.503357	50.0734
1250.5	34985.2	860.691	33502.6	800.745	0.0326142	0.503704	50.5125
1252	35076.5	906.567	33572.7	802.85	0.0350306	0.504057	50.9267
1253.5	35161.5	853.945	33642	798.111	0.0319271	0.504573	51.3768
1255	35254.6	880.926	33709.5	838.87	0.0373736	0.505182	51.7696
1256.5	35334	896.628	33780.9	811.612	0.0339119	0.505922	52.2032
1258	35421.4	913.448	33850.8	805.927	0.0345832	0.50676	52.6294
1259.5	35507	899.283	33919.3	818.569	0.0338725	0.507314	52.9518
1261	35594.3	900.009	33991.3	770.001	0.0351508	0.506412	52.8837
1262.5	35678.6	873.123	34079.4	797.242	0.036403	0.50557	52.7984
1264	35760.1	826.614	34164.8	913.923	0.0391461	0.504813	52.7186
1265.5	35836	867.446	34256.8	857.573	0.0367106	0.504224	52.6263
1267	35917	845.233	34358	855.043	0.0373296	0.503844	52.5311
1268.5	35996.8	831.958	34454.1	889.249	0.0386855	0.503585	52.4331
1270	36073.8	857.468	34551.6	815.659	0.037527	0.503322	52.3226
1271.5	36153.2	887.904	34648.2	868.954	0.0358128	0.503806	52.3537
1273	36236.3	884.007	34735.1	951.197	0.0361301	0.504327	52.3932
1274.5	36318.7	882.131	34827.9	916.346	0.0356174	0.504728	52.4294
1276	36402.1	826.618	34924	891.459	0.0355266	0.50507	52.4637
1277.5	36485.7	872.096	35015.8	845.323	0.0382499	0.505201	52.4948
1279	36563.3	815.945	35103.7	933.951	0.0344892	0.505261	52.5353
1280.5	36649.4	878.635	35189.8	814.761	0.0384679	0.505217	52.6383
1282	36726.6	819.227	35276.1	902.895	0.033614	0.505068	52.7737
1283.5	36814.9	852.696	35354.2	894.448	0.0372144	0.504781	52.9096
1285	36894.8	851.807	35438.1	918.156	0.0336144	0.504309	53.0562
1286.5	36983.3	819.949	35521.2	895.407	0.034268	0.504248	53.3366
1288	37070.1	798.358	35600.2	900.381	0.0356885	0.504249	53.6353
1289.5	37153.4	780.284	35676	875.113	0.0355741	0.504275	53.9421
1291	37237	752.012	35749.1	818.297	0.0371991	0.504302	54.2565
1292.5	37317	729.699	35817.7	870.348	0.0376476	0.504636	54.7518
1294	37395.9	709.558	35883	859.992	0.0397975	0.505489	55.3041
1295.5	37470.5	729.072	35946	832.677	0.0371505	0.506424	55.8422
1297	37550.2	693.977	36008.1	831.799	0.0388895	0.507475	56.316
1298.5	37626.2	663.55	36069.7	855.18	0.0399653	0.508557	56.7695
1300	37700	669.199	36133.6	891.213	0.0407911	0.509626	57.2172
1301.5	37772.2	685.211	36199.8	880.045	0.0399702	0.510615	57.6263
1303	37845.7	644.612	36267.9	887.428	0.038246	0.511655	57.9751
1304.5	37922.4	626.075	36337.4	880.177	0.0425668	0.512878	57.9108
1306	37991.1	611.638	36418.7	812.834	0.0417143	0.514159	57.7579
1307.5	38061	578.061	36501.4	885.987	0.0458043	0.515427	57.6112
1309	38124.5	576.039	36580.8	796.109	0.0466617	0.51694	57.5267
1310.5	38186.7	599.257	36662.9	894.878	0.0457481	0.518253	57.4114
1312	38250	568.251	36741.1	801.99	0.0435752	0.518211	57.0757
1313.5	38316.4	578.105	36837.4	868.149	0.0483613	0.518108	56.7412
1315	38376.3	593.618	36930.3	841.689	0.0457993	0.51786	56.4097
1316.5	38439.5	607.446	37028.8	801.243	0.0463842	0.517279	56.2662
1318	38502	595.44	37119.8	794.879	0.0455787	0.516585	56.1904
1319.5	38565.7	600.186	37207.6	756.756	0.0498535	0.516085	56.1389
1321	38624	604.685	37291.8	743.169	0.0480183	0.516033	56.0474
1322.5	38684.6	610.409	37373.7	699.361	0.0496056	0.515686	55.9016
1324	38743.2	632.853	37454.2	736.29	0.0488566	0.515277	55.706
1325.5	38802.8	633.2	37539.4	698.543	0.0468523	0.514591	55.5052
1327	38865	620.321	37623.1	663.308	0.0489152	0.514056	55.3049
1328.5	38924.7	617.451	37703.4	669.457	0.0491391	0.513254	54.9417
1330	38984.1	614.702	37786.9	688.588	0.0491428	0.512052	54.5188
1331.5	39043.8	610.714	37875.5	622.291	0.0498148	0.510863	54.095
1333	39102.7	582.455	37962	629.277	0.0492855	0.509396	53.6649
1334.5	39162.4	576.955	38045.3	578.751	0.0521389	0.507874	53.2486
1336	39219.1	587.049	38122.7	575.349	0.0517374	0.50607	52.8694
1337.5	39276.4	612.012	38197	603.105	0.0493638	0.504761	52.5931
1339	39336.6	641.07	38270	555.048	0.0451955	0.503245	52.3344
1340.5	39402.5	644.745	38342.9	591.263	0.0479515	0.501749	52.4613
1342	39464.9	621.981	38404.8	595.632	0.0443543	0.500124	52.7275
1343.5	39532.5	662.732	38465.8	616.387	0.0460763	0.49841	52.9863
1345	39597.8	653.126	38527.1	580.94	0.0417949	0.496763	53.2429
1346.5	39670.1	678.564	38587.2	610.862	0.0435639	0.494982	53.4385
1348	39739.6	699.392	38646.2	600.975	0.0390074	0.493103	53.5301
1349.5	39817.6	688.098	38708.2	616.213	0.0396843	0.491262	53.6062
1351	39894.5	681.302	38769.6	645.411	0.0394412	0.489412	53.6651
1352.5	39972.3	663.847	38833.3	621.964	0.0407654	0.48758	53.4367
1354	40047.7	664.78	38902.6	618.373	0.0403963	0.485638	53.1078
1355.5	40124.2	650.915	38972.6	615.448	0.0409064	0.483206	52.7894
1357	40200.1	641.057	39043.4	610.869	0.0423861	0.480732	52.4846
1358.5	40273.7	655.359	39113.4	577.319	0.0410137	0.478256	52.176
1360	40350.2	654.684	39183.1	576.802	0.0415101	0.475771	51.8622
1361.5	40426.1	665.901	39250.6	596.02	0.0412262	0.473327	51.5246
1363	40503	681.946	39321	639.713	0.0403271	0.470904	51.1875
1364.5	40582	690.545	39397.9	646.42	0.0401216	0.468497	50.948
1366	40661.8	711.052	39470.8	619.825	0.0402286	0.466133	50.747
1367.5	40741.8	741.44	39547.5	673.181	0.0377165	0.463851	50.5366
1369	40827.5	743.511	39624.7	642.397	0.0388831	0.461538	50.3452
1370.5	40911.1	765.071	39705.5	706.816	0.036709	0.459352	50.15
1372	41000	719.453	39789.7	688.5	0.0390981	0.457647	50.0222
1373.5	41083.9	679.646	39874.4	687.279	0.042332	0.456057	50.0079
1375	41161.6	698.406	39956.4	662.947	0.0411761	0.455303	50.1447
1376.5	41241.6	715.192	40031.1	667.183	0.039979	0.454876	50.3038
1378	41324.1	683.734	40104.7	656.554	0.0419479	0.454432	50.4193
1379.5	41402.7	691.692	40179.2	634.976	0.043074	0.453653	50.5196
1381	41479.5	688.434	40253.2	656.537	0.0401842	0.453095	50.6094
1382.5	41561.9	658.364	40328.2	652.234	0.0447234	0.452842	50.6139
1384	41636	698.192	40404.8	660.784	0.0423541	0.452615	50.6471
1385.5	41714.2	721.975	40481.3	679.168	0.0380706	0.452481	50.7333
1387	41801.3	700.596	40558	688.982	0.0396961	0.452244	50.7981
1388.5	41884.8	699.193	40636.6	694.1	0.0391394	0.452229	50.8307
1390	41969.6	713.91	40715.8	747.425	0.0390172	0.452386	50.8312
1391.5	42054.6	778.774	40799.2	728.208	0.0348444	0.451879	50.7091
1393	42149.8	739.82	40888	776.205	0.0360402	0.451303	50.5904
1394.5	42242.1	727.631	40980.4	731.664	0.0398322	0.450806	50.4805
1396	42325.6	767.849	41069.5	676.309	0.0365299	0.450463	50.391
1397.5	42416.7	744.707	41151.2	695.308	0.0372282	0.450097	50.5243
1399	42506.3	755.493	41228.7	718.568	0.0387548	0.449772	50.9243
1400.5	42592.3	795.57	41301.8	699.359	0.0382354	0.449348	52.2155
1402	42679.6	812.211	41352.2	663.933	0.0366595	0.448879	51.1895
1403.5	42770.8	823.088	41455.1	720.435	0.0367385	0.448304	52.2579
1405	42861.9	809.384	41511	647.284	0.0382228	0.447734	52.5593
1406.5	42949.5	800.253	41585	663.384	0.0376985	0.447136	51.4573
1408	43038.5	781.814	41687.7	733.506	0.0395613	0.446524	51.7258
1409.5	43123.4	789.194	41766.6	699.177	0.0398784	0.445806	51.7052
1411	43207.8	812.545	41854.2	702.763	0.0388887	0.44504	51.572
1412.5	43294.4	827.346	41944.1	692.298	0.0380162	0.444149	50.9253
1414	43383.3	839.454	42047.9	780.21	0.0383005	0.44343	51.6558
1415.5	43471.6	845.699	42124.1	763.897	0.0372205	0.443651	52.2283
1417	43562.4	828.614	42200.8	692.207	0.0368888	0.443651	51.9822
1418.5	43654.1	817.669	42294.3	772.479	0.0363841	0.443491	53.2702
1420	43747.1	805.371	42348.4	764.476	0.036208	0.443206	53.4553
1421.5	43840.5	787.607	42435.1	739.387	0.0361329	0.442782	53.4405
1423	43934.3	775.47	42525.6	759.879	0.0361384	0.442207	53.9314
1424.5	44028.1	774.052	42601.1	800.278	0.0362328	0.441509	54.3012
1426	44121.9	764.509	42681.2	812.447	0.0363163	0.440643	55.0668
1427.5	44215.7	750.961	42754.7	828.416	0.0363805	0.439606	56.0272
1429	44309.4	751.647	42823.6	805.597	0.0364206	0.438371	56.4266
1430.5	44403.4	738.068	42906.5	813.807	0.0364253	0.43665	56.1913
1432	44497.7	723.315	43006.7	782.224	0.0364145	0.434843	56.559
1433.5	44592.4	718.583	43089.8	781.154	0.0364059	0.433319	56.959
1435	44687.5	717.405	43169.4	800.198	0.0364032	0.431915	57.1104
1436.5	44782.9	738.772	43255.9	828.053	0.0364363	0.430926	58.0632
1438	44878.4	712.872	43322.8	826.826	0.0343128	0.430554	58.5753
1439.5	44980	698.473	43399.8	842.899	0.0376864	0.430402	58.6519
1441	45072.5	674.847	43487.1	846.304	0.0369574	0.429399	58.9424
1442.5	45167	671.279	43574.1	825.885	0.0400486	0.426574	57.4181
1444	45254.8	676.467	43716.5	811.263	0.0381984	0.423605	56.813
1445.5	45347.5	676.701	43836.4	788.142	0.0395784	0.420572	55.516
1447	45437.6	687.912	43975.1	770.192	0.0379477	0.41748	55.0443
1448.5	45532.3	692.824	44091.9	778.687	0.039828	0.414151	56.7157
1450	45623.2	710.11	44153.9	749.413	0.0374339	0.410838	55.2256
1451.5	45720.8	677.245	44297.6	753.016	0.0401009	0.408568	56.4254
1453	45812.3	680.329	44368.7	744.776	0.0440924	0.406208	56.3431
1454.5	45896.1	683.839	44473.4	724.53	0.0399297	0.403816	54.6691
1456	45989.1	666.267	44619.3	717.241	0.0465883	0.401564	54.6948
1457.5	46069.3	716.348	44721.6	717.487	0.0407744	0.39934	55.3432
1459	46161.4	701.919	44808.3	747.605	0.0427041	0.397104	55.3901
1460.5	46249.8	697.404	44912.6	695.958	0.0446984	0.394905	56.0399
1462	46334.8	718.355	45002.8	699.323	0.0442321	0.392835	55.4934
1463.5	46421.1	769.665	45116.6	659.35	0.0413839	0.391106	55.5801
1465	46513.8	761.246	45211.6	681.841	0.0431562	0.389528	55.2674
1466.5	46603	759.609	45314.8	668.993	0.0448644	0.388123	55.4605
1468	46689.2	773.134	45406	690.525	0.0444596	0.386976	55.027
1469.5	46776.4	814.619	45513.7	681.611	0.0455188	0.38593	56.0509
1471	46861.8	842.973	45584.9	724.615	0.0426434	0.385143	56.5202
1472.5	46953.1	839.81	45670.8	692.092	0.0423536	0.384164	56.0882
1474	47045.3	865.477	45778.9	659.96	0.0441304	0.383645	56.8039
1475.5	47133.9	880.191	45851.8	704.427	0.0428731	0.382944	55.5474
1477	47225.2	882.985	45972.2	648.39	0.0422538	0.38254	56.3002
1478.5	47318	868.533	46040.6	720.904	0.0430589	0.382379	56.3913
1480	47409.1	872.623	46126.8	707.215	0.0452045	0.382226	56.0436
1481.5	47496	882.003	46225	692.172	0.04345	0.382101	55.2424
1483	47586.3	881.526	46328.7	714.011	0.0449685	0.382154	55.5005
1484.5	47673.6	898.422	46409.1	770.996	0.0428192	0.382285	56.1026
1486	47765.2	889.865	46486.2	762.494	0.0430902	0.382675	55.6564
1487.5	47856.2	882.716	46585.3	758.017	0.0446038	0.383369	55.4591
1489	47943.9	914.711	46674.2	765.993	0.042373	0.384372	54.3561
1490.5	48036	965.259	46782.5	817.518	0.0379764	0.38622	53.8719
1492	48138.3	964.738	46873.6	846.757	0.037749	0.387967	54.0421
1493.5	48240.7	958.578	46955.1	839.63	0.0375902	0.388687	53.7846
1495	48343.4	981.514	47050.9	867.079	0.0387455	0.388379	53.1544
1496.5	48443.1	1008.16	47155.6	883.615	0.035293	0.387084	52.6883
1498	48552.9	1012.45	47262.7	882.647	0.0367042	0.38457	52.7712
1499.5	48659.1	1023.75	47360.9	857.604	0.0353791	0.382226	52.5207
1501	48770	1018.13	47462.7	889.295	0.038189	0.37999	52.9374
1502.5	48873.4	1029.64	47549.2	870.325	0.0371111	0.378584	52.6234
1504	48980.2	1034.36	47649	900.465	0.0383127	0.377691	52.6981
1505.5	49083.8	1057.98	47740.6	892.853	0.0375069	0.376759	52.1361
1507	49190	1070.97	47847.5	879.893	0.0361894	0.375861	52.4736
1508.5	49300.3	1042.94	47930.9	907.072	0.0360162	0.375012	52.2517
1510	49411.3	1047.51	48030.2	965.288	0.0401159	0.374238	50.6513
1511.5	49511.2	1085.1	48175.5	964.549	0.0378029	0.373551	50.0483
1513	49617.5	1067.14	48295.8	953.541	0.0356681	0.372938	50.0401
1514.5	49730.2	1073.35	48399.1	1014.24	0.0372155	0.372314	49.9797
1516	49838.5	1097.03	48508.3	999.128	0.0363693	0.371881	49.7465
1517.5	49949.4	1097.97	48623.7	1033.66	0.0346192	0.371374	49.9163
1519	50066.1	1064.05	48730.3	1003.83	0.0344409	0.370978	50.1752
1520.5	50183.5	1077.01	48831.1	1040.08	0.0374846	0.370715	51.2328
1522	50291.4	1058.36	48909.5	1020.73	0.0348314	0.370692	50.5237
1523.5	50407.6	1059.09	49033.5	1044.64	0.0368572	0.370883	51.2655
1525	50517.3	1061.02	49118.3	1067.09	0.0360779	0.370448	50.9683
1526.5	50629.5	1025.09	49235.5	1073.43	0.0384819	0.37028	50.992
1528	50734.8	1043.97	49346.1	1021.39	0.0367868	0.370055	51.2345
1529.5	50845	1027.42	49447.3	1061.93	0.0376083	0.370189	52.2355
1531	50952.7	1032.2	49522.8	1089.29	0.0372284	0.370032	51.7015
1532.5	51061.6	1017.55	49645.2	1060.65	0.0383137	0.370038	51.2103
1534	51167.4	1012.08	49769.9	1079.28	0.0384918	0.370092	51.9064
1535.5	51272.7	1008.76	49859.9	1102.57	0.0387631	0.370351	51.6929
1537	51377.2	1013.97	49977	1096.54	0.0394479	0.370524	51.1113
1538.5	51479.8	997.691	50110	1048	0.0375676	0.370791	51.0705
1540	51587.5	994.183	50224	1093.03	0.0415986	0.371237	52.1296
1541.5	51684.6	973.602	50302.8	1052.48	0.0392169	0.371717	51.6439
1543	51787.5	947.455	50429.7	1060.48	0.0421191	0.37222	51.8129
1544.5	51883.2	980.789	50533.3	1061.12	0.0422749	0.372833	52.3227
1546	51978.4	962.489	50629	1024.98	0.0387129	0.373477	52.4234
1547.5	52082.1	952.922	50729.3	1044.91	0.040529	0.373758	52.5271
1549	52181.2	933.092	50835.3	1026.95	0.040842	0.374087	52.2247
1550.5	52279.3	929.643	50950.1	1032.58	0.0421018	0.374409	52.7284
1552	52374.5	924.061	51044.1	1018.81	0.0416251	0.375309	53.1243
1553.5	52470.5	903.89	51136.5	1012.17	0.0427487	0.376562	52.7807
1555	52563.7	900.58	51246.4	1011.87	0.0416373	0.377919	53.1878
1556.5	52659	890.138	51335.4	1001.36	0.0440517	0.379552	53.1912
1558	52748.7	875.372	51432.7	1030.69	0.0408263	0.381374	53.7928
1559.5	52845.1	841.989	51514.6	973.317	0.0412461	0.382977	53.5867
1561	52940	865.726	51618.4	1003.04	0.0430433	0.384128	53.9668
1562.5	53030.7	834.134	51703.2	965.374	0.0403819	0.384951	54.4152
1564.02	53128.5	848.789	51792.2	946.468	0.0430032	0.385498	53.2221
1565.5	53217.8	850.538	51913.9	992.343	0.0400219	0.38587	53.9675
1567	53314.9	817.546	51990.5	956.872	0.0406111	0.385989	53.5228
1568.5	53410.6	821.824	52104.6	951.952	0.0445012	0.385845	54.0614
1570	53498	821.16	52190.4	930.823	0.0427389	0.385735	54.3721
1571.5	53589	824.781	52281	929.62	0.0428446	0.385534	54.5613
1573	53679.8	833.578	52372.3	924.543	0.042445	0.385282	54.6234
1574.5	53771.5	823.51	52467.6	903.993	0.0417857	0.384851	54.5387
1576	53864.8	813.352	52564.4	900.556	0.0448271	0.384282	54.7809
1577.5	53951.9	812.681	52655.8	890.674	0.0448092	0.383545	54.6915
1579	54039.1	813.022	52750.2	875.126	0.0452375	0.382793	54.8271
1580.5	54125.8	801.47	52845.9	841.711	0.046199	0.38192	54.3956
1582	54210.8	817.934	52953.7	869.201	0.0468401	0.381	54.7138
1583.5	54294.8	823.716	53040.7	829.627	0.0443283	0.380079	54.4764
1585	54383.9	821.429	53145.1	852.402	0.0446462	0.379271	53.7283
1586.5	54472.4	829.204	53258.1	849.505	0.0434318	0.378515	54.6975
1588	54563.7	822.579	53333.8	806.92	0.0443401	0.377654	55.2429
1589.5	54653.3	821.229	53418.6	823.376	0.0452818	0.376527	54.6104
1591	54741.2	839.628	53524.5	820.419	0.0444618	0.375683	54.3972
1592.5	54831	859.697	53623.1	827.092	0.0430935	0.374739	54.2843
1594	54923.9	833.938	53720	838.18	0.0413475	0.37392	54.2135
1595.5	55020.9	855.524	53816.8	810.611	0.0442131	0.373097	54.8043
1597	55111.9	885.237	53896.9	815.186	0.0415653	0.372438	54.9562
1598.5	55208.8	895.385	53982.8	811.27	0.0394202	0.371711	54.6682
1600	55311.1	883.534	54078.4	814.243	0.0394579	0.371061	55.7549
1601.5	55413.6	858.461	54143.4	796.712	0.0402498	0.370526	54.5336
1603	55514.2	876.234	54255.3	831.949	0.0423218	0.369661	54.941
1604.5	55610.1	905.802	54335.8	815.188	0.0408845	0.368651	53.7493
1606	55709.6	899.782	54453.9	830.522	0.0423064	0.367533	53.7389
1607.5	55806	908.251	54548.4	823.815	0.0424294	0.366357	54.1706
1609	55902.5	920.801	54632.6	816.994	0.0422291	0.364922	54.3402
1610.5	55999.9	932.359	54721.9	835.303	0.0418616	0.3638	53.1015
1612	56098.4	945.867	54842.3	862.211	0.0409151	0.362084	52.8805
1613.5	56199.6	948.53	54946.7	826.035	0.0410483	0.360483	52.7164
1615	56301	953.439	55051.1	867.489	0.0406467	0.359244	52.8068
1616.5	56403.7	964.131	55146.1	895.217	0.0400933	0.357977	51.7935
1618	56508.2	975.029	55274.2	895.561	0.0390715	0.356678	51.1442
1619.5	56615.9	980.496	55397.1	855.54	0.0398623	0.355525	50.2335
1621	56721.7	1005.9	55523.2	877.823	0.0366809	0.355356	51.7134
1622.5	56836.8	983.373	55586	908.088	0.0395765	0.355621	51.4811
1624	56943.4	1002.84	55689.2	898.291	0.0380664	0.355809	51.5307
1625.5	57054.1	1005.99	55784.5	905.251	0.0383267	0.355978	51.4797
1627	57164.1	1005.74	55881.6	918.771	0.0386322	0.356225	51.7497
1628.5	57273.1	1007.16	55971.7	927.501	0.0401819	0.356365	51.5076
1630	57377.8	1028.11	56075	945.307	0.0391867	0.356559	51.3136
1631.5	57485.2	1043.56	56179.6	947.816	0.0383658	0.356953	51.4746
1633	57594.7	1038.01	56275.7	951.248	0.0385345	0.357603	51.3459
1634.5	57703.5	1020.66	56379	960.199	0.0410756	0.357987	51.2675
1636	57805.6	1025.61	56483.6	976.822	0.0435722	0.358495	51.1675
1637.5	57901.6	1033.04	56591.2	968.98	0.042817	0.359092	51.3505
1639	57999.1	1020.88	56690.7	1015.48	0.0430842	0.35981	50.8625
1640.51	58096.5	1015.85	56814.5	977.258	0.0458668	0.360516	51.417
1642	58186.7	1050.21	56905.2	1002.13	0.0465868	0.361073	51.1382
1643.5	58275.8	1043.44	57019.8	1004.27	0.04262	0.361639	51.0827
1645	58373.1	1037.11	57129.3	1009.77	0.0447106	0.362204	51.3944
1646.5	58465.8	1059.23	57228.3	998.28	0.0435882	0.362675	51.4551
1648	58560.7	1053.26	57331.6	1018.79	0.0456797	0.363411	51.2576
1649.5	58651	1071.42	57440.2	1040.71	0.0458992	0.364041	51.1637
1651	58740.8	1100.18	57549	1047.6	0.0416073	0.364677	51.2806
1652.5	58839.6	1096.16	57652.7	1025.85	0.0441892	0.365096	51.445
1654	58932.6	1108.09	57752.3	1015.68	0.0453642	0.365294	52.3842
1655.5	59023.1	1117.35	57828.9	1029.96	0.0451267	0.365446	52.4386
1657	59114.1	1124.39	57923.5	1033.97	0.045747	0.365452	52.5947
1658.5	59203.8	1125.5	58017.1	1017.76	0.0477013	0.365389	53.1686
1660	59289.9	1149.75	58100.3	1015.76	0.0458605	0.365236	53.8011
1661.5	59379.4	1172.93	58177.6	1050.9	0.0446876	0.365054	52.6007
1663	59471.4	1161.3	58295.2	1041.97	0.0483022	0.366092	53.1078
1664.5	59556.2	1166.94	58376.7	1036.89	0.0494819	0.367754	53.2986
1665.99	59638.1	1175.06	58458.9	1060	0.0494104	0.369258	54.1167
1667.5	59720.9	1186.67	58530.1	1052.05	0.0492444	0.370714	54.1219
1669	59803	1200.17	58617.1	1055.49	0.0479352	0.372175	53.5133
1670.5	59887.1	1213.11	58715.9	1101.86	0.04813	0.373587	53.8746
1672	59970.5	1217.71	58798.3	1096.31	0.0466838	0.374971	54.8509
1673.5	60056.2	1221.77	58866.5	1096.07	0.0509492	0.376284	54.4692
1675	60134.5	1247.02	58963	1113.61	0.0459184	0.377533	55.1984
1676.5	60221	1243.83	59032.9	1117.95	0.0470773	0.378717	55.8911
1678	60305.1	1243.37	59104	1124.59	0.0494071	0.379407	55.7781
1679.5	60385.1	1260.7	59194.1	1122.79	0.0469561	0.380009	55.8575
1681	60469.2	1281.32	59276.9	1145.85	0.0447365	0.379746	55.6112
1682.5	60557.5	1279.49	59372.4	1174.53	0.0459313	0.379252	56.866
1684	60643.6	1288.7	59436.7	1159.95	0.0457313	0.37871	57.1559
1685.5	60730.2	1308.44	59519.7	1163.19	0.0467047	0.378196	57.5261
1687	60815.1	1313.95	59597.1	1171.15	0.0443187	0.377712	57.2941
1688.5	60904.7	1324.53	59685.7	1179.6	0.0435468	0.377167	57.0074
1690	60996.1	1318.76	59775.6	1197.7	0.0429908	0.376563	57.1718
1691.5	61088.7	1332	59857.5	1205.06	0.0449631	0.375917	57.271
1693	61177.5	1352	59941.1	1227.76	0.0417556	0.375204	58.0053
1694.5	61273.2	1365.13	60012.6	1203.36	0.0396962	0.374386	57.0651
1696	61374.1	1362.29	60115.4	1246.77	0.040904	0.373526	57.5914
1697.5	61472.3	1356.68	60191.4	1247.75	0.0421135	0.372598	57.8976
1699	61567.9	1365.36	60273	1236.91	0.0433634	0.371411	57.5877
1700.5	61661	1386.56	60364.4	1255.28	0.0404784	0.369828	57.0012
1702	61761.2	1401.34	60464.7	1281.5	0.0398349	0.368252	57.612
1703.5	61863.5	1425.75	60544.8	1278.29	0.0395843	0.36687	57.5747
1705	61966.8	1431.25	60636.6	1286.99	0.0386589	0.365585	57.7984
1706.5	62072.9	1453.55	60722.7	1307.95	0.0386919	0.364353	57.2738
1708	62179.3	1462.23	60823	1314.47	0.0371688	0.363064	56.4976
1709.5	62290.5	1458.18	60934.4	1328.19	0.0375839	0.361784	57.0889
1711	62400.8	1451.12	61017.4	1315.49	0.03934	0.360655	56.7149
1712.5	62506.5	1476.07	61121	1339.48	0.0399193	0.359571	55.7086
1714	62611	1480.82	61239.3	1365.7	0.0370783	0.358575	56.1476
1715.5	62723.8	1477.24	61331.5	1364.17	0.0391475	0.357606	56.6708
1717	62831	1487.24	61422.2	1360.17	0.0378212	0.356726	56.6446
1718.5	62942.2	1499.05	61522.9	1353.16	0.0374363	0.355939	55.9873
1720	63054.7	1531.18	61634.5	1383.41	0.0356303	0.35515	55.7568
1721.5	63173.3	1529.52	61741.1	1396.05	0.0348607	0.354415	55.4974
1723	63294.7	1527.91	61852	1425.14	0.0356983	0.353328	55.1378
1724.5	63413.6	1541.78	61968.1	1431.32	0.0358356	0.352041	54.6876
1726	63532.5	1539.93	62090.5	1457.28	0.0350006	0.350859	54.6197
1727.5	63654.7	1562.78	62204.2	1463.61	0.0359222	0.349827	54.8006
1729	63774	1572.08	62314.7	1456.66	0.0333144	0.348824	55.1879
1730.5	63903.1	1577.46	62418.4	1449.99	0.0334605	0.34789	53.8675
1732	64032	1569.81	62559.5	1491.73	0.0330374	0.347023	54.3139
1733.5	64162.8	1561.49	62660	1470.44	0.0359421	0.346317	53.5416
1735	64283.3	1578.84	62792.2	1484.53	0.0344984	0.345666	52.7125
1736.5	64409.1	1582.86	62925.8	1493.86	0.0334413	0.345117	52.5656
1738	64539.1	1571.6	63044.1	1531.32	0.0341787	0.344818	51.7722
1739.5	64666.3	1559.87	63185.3	1529.35	0.0359395	0.344531	52.0891
1741	64787.5	1568.25	63298.9	1527.85	0.035776	0.344458	51.378
1742.5	64909.2	1578.17	63437.6	1544.7	0.0354137	0.344473	51.3446
1744	65032.2	1569.92	63558	1538.65	0.0369893	0.344433	51.2655
1745.5	65149.9	1586.34	63681.9	1569.59	0.0364134	0.344242	50.0135
1747	65269.6	1583.83	63841.4	1573.91	0.0378842	0.343944	49.9473
1748.5	65384.7	1620.25	63973.6	1581.51	0.0378675	0.343813	49.5423
1750	65499.9	1620.51	64116.3	1552.89	0.0348071	0.34342	50.1419
1751.5	65625.4	1625.97	64225.5	1573.08	0.0375397	0.343162	49.6956
1753	65741.8	1622.91	64362.7	1586.73	0.0357065	0.342861	49.0379
1754.5	65864.3	1635.23	64511.9	1574.29	0.0390301	0.342502	48.3677
1756	65976.5	1611.77	64660.7	1559.5	0.0364238	0.342073	48.7267
1757.5	66096.9	1634.14	64773.9	1566.88	0.0404258	0.341636	48.697
1759	66205.5	1643.19	64898.1	1579.4	0.0378732	0.342015	48.8665
1760.5	66321.3	1643.28	65014.7	1566.43	0.0378855	0.343624	48.8882
1762	66436.6	1644.04	65126.4	1588.78	0.0375643	0.345177	49.5364
1763.5	66552.3	1649.8	65221.8	1578.89	0.0372811	0.346226	49.7232
1765	66668.5	1638.59	65329.8	1590.07	0.0374909	0.346885	50.1417
1766.5	66783.8	1637.41	65431.3	1645.87	0.0376586	0.347415	50.1489
1768	66898.5	1650.83	65548.2	1602.66	0.037794	0.347913	49.2575
1769.5	67012.5	1658.72	65692.3	1646.2	0.0379035	0.348335	50.0427
1771	67126.1	1664.01	65788.2	1601.05	0.0379709	0.348713	49.6936
1772.5	67239.4	1677.21	65914.5	1657.79	0.0374805	0.349031	50.9545
1774	67354.1	1693.71	65993.8	1598.95	0.0373879	0.349276	50.3817
1775.5	67469	1692.15	66126.1	1644.1	0.0359721	0.349514	51.3523
1777	67588.3	1672.69	66209.5	1643.14	0.0388242	0.349809	51.4383
1778.5	67698.7	1678.75	66321.8	1643.28	0.0390689	0.35013	51.2284
1780	67808.4	1677.78	66441.5	1644.07	0.0386895	0.350455	51.1581
1781.5	67919	1696.59	66557.8	1650.08	0.0389376	0.350862	51.8595
1783	68028.8	1666.55	66653.3	1638.75	0.0373145	0.351335	50.9762
1784.5	68143.2	1662.25	66790.7	1637.34	0.03934	0.351834	50.7503
1786	68251.6	1674.89	66909.4	1652.2	0.0382186	0.352282	52.0473
1787.5	68363	1704.73	66987	1658.49	0.0371502	0.352745	52.4647
1789	68477.5	1689.48	67087.8	1659.39	0.0358485	0.353408	52.0825
1790.5	68595.8	1718.26	67208.7	1673.95	0.0361581	0.354113	52.2322
1792	68713	1674	67316.2	1685.35	0.03413	0.354939	52.6656
1793.5	68836.8	1671.12	67415.9	1707.32	0.0378043	0.35587	52.1965
1795	68948.3	1675.86	67542.5	1671.12	0.0375967	0.356905	52.7609
1796.5	69060.1	1681.4	67637.5	1674.38	0.0377199	0.357995	53.2224
1798	69171.2	1678.14	67731.4	1681.09	0.0369085	0.358961	53.4824
1799.5	69284.4	1674.46	67830.6	1676.82	0.0369797	0.360148	53.5805
1801	69397	1677.14	67933.9	1699.92	0.0366962	0.361344	53.7833
1802.5	69510.2	1643.07	68033.8	1664.78	0.0350066	0.361872	53.7084
1804	69628.6	1592.2	68147.9	1662.15	0.0412663	0.362384	54.2053
1805.5	69728.9	1589.72	68241.2	1671.97	0.0404926	0.362986	53.8688
1807	69830.9	1580.58	68359	1705.26	0.0412509	0.363398	53.6075
1808.5	69931	1560.3	68479	1689.28	0.0410766	0.363325	52.6967
1810	70031.5	1555.06	68623.5	1725.11	0.0438968	0.362873	52.8927
1811.5	70125.7	1570.76	68738.3	1659.54	0.0392308	0.362293	52.059
1813	70231.2	1559.17	68884.3	1676.7	0.0384776	0.361768	53.2776
1814.5	70339	1542.1	68965.2	1675.64	0.0408831	0.361096	53.1332
1816	70440.6	1555.18	69083.3	1682.81	0.038724	0.360264	52.7151
1817.5	70548.1	1537.38	69209.6	1676.09	0.0376274	0.359294	52.5331
1819	70659	1515.56	69331.3	1673.43	0.03956	0.358024	52.5641
1820.5	70764.9	1511.56	69448.4	1680.05	0.042203	0.35652	51.6938
1822	70864.6	1498.78	69594.6	1592.51	0.0407303	0.354982	51.643
1823.5	70968.4	1496.83	69706.6	1591.5	0.0435127	0.353716	51.8376
1825	71065.8	1491.91	69808.1	1583.38	0.0430733	0.352607	53.0962
1826.5	71164.6	1487.26	69882.8	1574.21	0.0431382	0.351656	52.9092
1828	71263.5	1477.88	69990.9	1542.99	0.0429202	0.350822	52.8151
1829.5	71363.1	1468.85	70092.5	1573.19	0.0439738	0.350182	52.8498
1831	71460.5	1464.21	70195.5	1565.63	0.0454845	0.349785	51.7475
1832.5	71554.8	1457.94	70331.7	1540.95	0.0454936	0.349422	51.9217
1834	71649.2	1455.15	70430.9	1556.78	0.046346	0.349032	50.9359
1835.5	71741.9	1447.16	70564.5	1534.67	0.0453713	0.3485	50.8523
1837	71836.8	1437.39	70678.7	1511.59	0.0512035	0.347677	50.8815
1838.5	71921	1440.11	70785.5	1511.56	0.0492705	0.346751	52.1317
1840	72008.8	1437.4	70859.5	1498.87	0.0511901	0.345531	51.8066
1841.5	72093.6	1443.06	70974.8	1496.71	0.0511154	0.343476	52.1448
1843	72179	1439.92	71071.7	1491.6	0.0486451	0.340707	52.5122
1844.5	72269.6	1437.19	71171.8	1486.92	0.0505194	0.337853	52.4918
1846	72357.4	1438.39	71281.1	1476.14	0.0522698	0.334797	52.417
1847.5	72443.2	1442.9	71392.4	1466.24	0.052192	0.331537	52.6941
1849	72529.8	1445.9	71493.8	1463.22	0.0514763	0.32773	53.2875
1850.5	72618.8	1449.07	71588.5	1455.02	0.0540842	0.323585	53.0448
1852	72704.5	1457.07	71700.8	1455.26	0.0511208	0.319156	53.5196
1853.5	72796.4	1458.5	71800	1435.71	0.0522543	0.314473	53.1077
1855	72887.7	1463.51	71909.7	1440.73	0.0526041	0.309902	54.2257
1856.5	72979.7	1469.34	71991	1436.21	0.0508829	0.30531	53.8614
1858	73076.3	1469.25	72096.8	1443.27	0.0535031	0.300709	54.3023
1859.5	73169.5	1472.19	72189.4	1439.51	0.0514414	0.295937	54.1806
1861	73268	1478.05	72296.9	1436.4	0.0542482	0.291102	53.7617
1862.5	73363	1485.79	72406	1439.99	0.0478722	0.288357	54.0474
1864	73471.7	1491.45	72496	1447.03	0.0494199	0.285547	54.7554
1865.5	73578	1512.95	72581.1	1444.18	0.042132	0.282699	54.6039
1867	73703.9	1510.1	72679.5	1456.97	0.0428258	0.280305	55.0896
1868.5	73828.9	1504.35	72769.3	1457.34	0.044419	0.279135	54.7853
1870	73949.8	1501.95	72869.9	1461.66	0.0451606	0.278907	55.2399
1871.5	74068.9	1503.24	72954.7	1470.47	0.044452	0.279086	55.3385
1873	74189.8	1502.18	73047.7	1466.27	0.0439166	0.27941	55.825
1874.5	74312.1	1492.19	73132.3	1475.1	0.0477505	0.279949	55.9115
1876	74424.3	1494.23	73225.2	1467.83	0.0477322	0.280674	55.8365
1877.5	74536.2	1493.64	73320.5	1490.54	0.0460242	0.281556	55.6946
1879	74652	1489.47	73422.3	1479.15	0.0488847	0.282641	54.0125
1880.5	74760.6	1491.92	73559.1	1513.23	0.0479328	0.28298	54.0465
1882	74871.2	1489.56	73679.2	1511.44	0.0475685	0.283313	54.4469
1883.5	74982.5	1483.6	73793.4	1505.24	0.0513852	0.283634	54.8465
1885	75085.4	1499.13	73905	1502.46	0.047054	0.283749	55.1804
1886.5	75197.7	1495.73	74016.7	1501.19	0.0479996	0.283621	54.3717
1888	75307.9	1491.25	74155.9	1506.64	0.0503962	0.283058	55.0511
1889.5	75413.1	1495.9	74264.6	1492.37	0.0507757	0.281995	55.7623
1891	75517.8	1499.94	74370.1	1491.97	0.0531245	0.280518	55.826
1892.5	75618.5	1512.84	74487	1496.85	0.0510492	0.278885	55.3669
1894	75723.8	1519.33	74618	1488.31	0.0516828	0.277112	56.1082
1895.5	75828.6	1524.17	74720.9	1491.82	0.0521022	0.27527	55.9473
1897	75933.1	1540.36	74841.6	1492.14	0.053494	0.273411	55.5771
1898.5	76035.7	1546.56	74968	1481.12	0.0520343	0.271538	55.8009
1900	76141.9	1583.44	75074.9	1499.41	0.0520623	0.269775	56.4999
1901.5	76248.7	1582.94	75179.6	1496.61	0.0486962	0.269546	56.1338
1903	76362.9	1569.2	75298.3	1490.83	0.0495798	0.270665	55.4073
1904.5	76474.7	1587.48	75413.3	1495.91	0.0534764	0.271836	56.5362
1906	76577.9	1591.48	75492.1	1495.48	0.050309	0.273095	57.3601
1907.5	76687.1	1589.49	75573.9	1509.64	0.0499592	0.274466	57.5326
1909	76796.5	1588	75668.3	1516.41	0.0504717	0.276003	58.1646
1910.5	76904.2	1589.26	75755	1520.97	0.0513082	0.277293	58.0179
1912	77009.6	1587.33	75857.3	1525.41	0.0512004	0.278514	58.331
1913.5	77114.8	1595.65	75950.5	1543.78	0.0514066	0.279451	58.8294
1915	77219.2	1596.25	76040	1546.7	0.0478482	0.279929	59.093
1916.5	77331.2	1597.5	76138.9	1583.45	0.0482757	0.280601	58.6544
1918	77441.9	1598.75	76251.8	1582.93	0.0470261	0.280559	58.0235
1919.5	77555.6	1594.37	76379.4	1567.17	0.0480285	0.28036	57.991
1921	77667	1589.51	76491.3	1591.02	0.0490892	0.280122	58.8365
1922.5	77776.1	1590.31	76579.3	1591.49	0.0506017	0.279303	58.2028
1924	77882.2	1596.92	76704.9	1589.16	0.0472509	0.278759	57.9771
1925.5	77996.1	1592.14	76820.8	1587.69	0.0487521	0.278468	58.3088
1927	78106.6	1585.11	76922.6	1589.61	0.0516691	0.278016	58.7275
1928.5	78211	1590.16	77021.7	1587.02	0.0491773	0.277437	58.1869
1930	78321	1588.53	77139.6	1597.95	0.0499624	0.27626	57.0779
1931.5	78429.6	1577.15	77273.8	1595.08	0.0546629	0.275255	56.9098
1933	78529.3	1584.36	77392.9	1600.1	0.0514752	0.274063	56.7351
1934.5	78635.7	1579.11	77514	1596.77	0.050448	0.272742	57.1715
1936	78744.7	1572.41	77623	1590.5	0.0529936	0.271441	56.5328
1937.5	78848.9	1571.73	77751	1587.63	0.0521042	0.269961	57.3588
1939	78955.6	1559.01	77847.9	1597.97	0.0496287	0.268461	56.8343
1940.5	79068.2	1555.47	77976.5	1594.04	0.0546777	0.267343	57.323
1942	79170.8	1549.6	78082.7	1583.76	0.0514138	0.26622	57.0864
1943.5	79280.4	1542.72	78197.3	1590.23	0.0518437	0.265113	56.9324
1945	79389.5	1537.32	78314.1	1589.64	0.0524447	0.264008	58.0986
1946.5	79497.8	1529.55	78405.1	1574.88	0.0511717	0.263082	57.8306
1948	79609.3	1523.12	78515.1	1585.06	0.0529368	0.262292	57.0665
1949.5	79717.3	1514.62	78638	1579	0.0521173	0.261506	57.8295
1951	79827.4	1510.4	78735.7	1572.47	0.054285	0.26082	57.3899
1952.5	79933.3	1506.03	78851.2	1571.72	0.0508788	0.260075	56.7181
1954	80046.7	1497.22	78974.3	1556.74	0.0534535	0.259455	57.6636
1955.5	80154.8	1490.21	79070.8	1555.43	0.0552644	0.258759	56.699
1957	80259.7	1484.76	79194.8	1548.2	0.0555178	0.257984	56.685
1958.5	80364.4	1479.92	79307.7	1540.97	0.0557129	0.257329	56.783
1960	80469.1	1475.16	79417.5	1536.07	0.0553412	0.257054	56.2521
1961.5	80574.5	1468.31	79538	1526.3	0.0540849	0.256082	56.3519
1963	80682.8	1464.15	79650.3	1521.3	0.0564713	0.254547	56.7043
1964.5	80787.2	1462.95	79758.8	1510.48	0.0570172	0.253001	56.3112
1966	80891.1	1458.64	79880.6	1510.34	0.0565952	0.251319	56.3294
1967.5	80996.6	1456.03	79997	1500.83	0.0588322	0.249368	56.7413
1969	81098.9	1453.75	80108	1492.76	0.0596687	0.247265	56.8655
1970.5	81200.5	1450.97	80220.5	1486.64	0.0607326	0.244916	56.6643
1972	81301.4	1453.87	80338	1481.01	0.0621382	0.242306	56.7335
1973.5	81401	1450.37	80451.8	1476.31	0.059042	0.239673	56.7277
1975	81507	1451.05	80567.8	1468.57	0.0632975	0.236902	56.7155
1976.5	81607	1447.86	80687.3	1463.98	0.0621898	0.233791	56.6943
1978	81710.2	1446	80804.2	1462.77	0.065436	0.232651	57.4393
1979.5	81808.7	1445.66	80900.8	1458.18	0.0650388	0.231409	57.7386
1981	81908.4	1443.68	81006.1	1455.82	0.0640187	0.229942	58.101
1982.5	82010.3	1442.45	81108.3	1453.54	0.0665801	0.228275	58.2715
1984	82109	1443.4	81213.8	1450.59	0.0634041	0.226381	57.7894
1985.5	82213.5	1442.58	81329.1	1454.91	0.0644209	0.224219	58.8961
1987	82317.3	1442.75	81421.8	1449.06	0.0635727	0.221823	58.5099
1988.5	82423.7	1442.28	81541.7	1451.86	0.0632174	0.219355	59.6988
1990	82531.9	1442.52	81634.9	1446.15	0.0635623	0.21698	58.9523
1991.5	82640.6	1446.38	81756.7	1445.9	0.0611727	0.214711	59.5658
1993	82754.8	1448.14	81855.9	1445.44	0.0624737	0.212475	59.3111
1994.5	82867.8	1447.83	81969.4	1441.62	0.0621709	0.210533	59.3996
1996	82982.4	1451.77	82075.7	1443.78	0.0627467	0.208883	59.1758
1997.5	83096.9	1451.4	82188.3	1442.48	0.0598771	0.207302	59.6488
1999	83217.7	1450.82	82292	1442.89	0.0621423	0.205785	59.5014
2000.5	83335	1454.21	82406.4	1442.25	0.06319	0.204414	58.915
2002	83451.1	1454.48	82528.8	1442.41	0.0612741	0.203019	59.3353
2003.5	83571.7	1455.96	82637.3	1446.33	0.0630316	0.20164	59.6505
2005	83689.7	1457.78	82752.7	1448.15	0.0625739	0.200164	59.4501
2006.5	83809.5	1459.15	82875.5	1447.81	0.0631832	0.198279	59.6159
2008	83929.2	1458.91	82996.1	1452.28	0.0636161	0.19678	59.3029
2009.5	84049.1	1462.47	83123.5	1451.17	0.0645162	0.195986	60.0012
2010.99	84166.9	1463.58	83235.8	1450.75	0.0619404	0.195353	59.9551
2012.5	84291.7	1466.16	83357.3	1454.99	0.0631815	0.194793	59.8176
2014	84413.6	1467.32	83479.1	1454.34	0.0622427	0.19439	60.2212
2015.5	84537.5	1472.13	83594.8	1456.36	0.0625526	0.194103	60.0939
2017	84661.1	1473.79	83716.5	1458.18	0.0599083	0.193966	60.627
2018.5	84790.2	1475	83828.7	1459.34	0.0600138	0.193824	60.6567
2020	84919.1	1478.64	83948.7	1458.83	0.0606147	0.19264	60.7474
2021.5	85047.6	1482.92	84072.6	1463.32	0.059399	0.192287	60.1463
2023.02	85180.7	1483.71	84205.3	1463.68	0.0578819	0.19231	60.5705
2024.5	85313.6	1487.22	84320.3	1466.98	0.0582109	0.192626	60.5259
2026	85447.4	1490.92	84441.8	1467.42	0.0566467	0.193033	60.2595
2027.5	85584.6	1490.31	84567.8	1473.63	0.0561511	0.193445	60.0356
2029	85722.7	1493.99	84694.3	1473.85	0.0559665	0.193955	59.6613
2030.5	85860.9	1503.82	84827	1475.45	0.0532469	0.194838	60.0767
2032	86005.4	1506.38	84944.4	1479.51	0.0542038	0.196127	59.9836
2033.5	86146.5	1509.7	85068.2	1483.6	0.0558573	0.197242	59.646
2035	86282.7	1521.23	85200	1483.73	0.0540944	0.198285	59.7544
2036.5	86422.5	1530.03	85327.1	1487.64	0.05336	0.199484	59.2371
2038	86563.5	1543.49	85464.1	1491.38	0.0536567	0.201096	59.1294
2039.5	86702.5	1554.75	85594.6	1490.22	0.0501143	0.202976	59.5353
2041	86849.9	1554.86	85714.9	1493.41	0.0512505	0.204947	59.0788
2042.5	86992.7	1557.76	85850.9	1503.64	0.0520103	0.20699	58.2879
2044	87132.1	1557.45	85999.2	1506.35	0.0505983	0.209146	58.8807
2045.5	87273.8	1552.87	86116.9	1507.04	0.0498828	0.21137	59.2531
2047	87416.1	1540.68	86235.1	1517.65	0.0497079	0.213664	58.7085
2048.5	87557.3	1542.05	86371.8	1527.94	0.0509472	0.215964	58.6607
2050	87693.6	1551.19	86500.6	1533.26	0.047404	0.21821	58.545
2051.5	87838.7	1548	86630.6	1554.43	0.0443358	0.220402	57.7092
2053	87992.2	1540.3	86779.2	1555.08	0.0451965	0.222531	57.8191
2054.5	88141.3	1538.53	86910.2	1554.68	0.0462835	0.224238	58.1346
2056	88285.8	1537.32	87035.8	1559.37	0.0457515	0.225661	57.8015
2057.5	88431.1	1531.86	87175.2	1556.59	0.0456293	0.227058	57.3278
2059	88575.9	1511.83	87319.6	1551.15	0.0478217	0.228389	57.3913
2060.5	88713.2	1518.12	87453	1536.67	0.0462049	0.229629	57.433
2062	88854.6	1496.5	87585.6	1543.52	0.0497742	0.230848	56.1621
2063.5	88985.2	1503.85	87745.4	1554.86	0.0488892	0.231959	55.7817
2065	89117.4	1506.29	87896.1	1543.77	0.0465824	0.233826	55.8837
2066.5	89255.1	1491.75	88035.2	1538.74	0.0480242	0.237675	56.7187
2068	89386.6	1488.25	88143.2	1538.53	0.0481587	0.240187	56.5165
2069.5	89516.2	1481.61	88278.6	1537.46	0.0488977	0.240454	56.8175
2071	89643.8	1477.84	88415.4	1534.68	0.0506918	0.240735	57.1416
2072.5	89766.7	1476.96	88551.2	1510.25	0.0511505	0.240584	56.5361
2074	89888.6	1474.31	88703.9	1520.05	0.0513493	0.240484	57.393
2075.5	90010.1	1471.61	88826.1	1494.71	0.0517678	0.240347	57.0652
2077	90130.7	1471.26	88966.4	1503.5	0.051423	0.239826	56.1838
2078.5	90252.3	1467.98	89119.8	1506.33	0.0506015	0.23906	56.5523
2080	90376.3	1465.35	89253.4	1491.8	0.052327	0.238602	56.4718
2081.5	90496.4	1467.65	89388.8	1488.2	0.0505547	0.237169	56.4528
2083	90621.5	1466.42	89525.7	1481.12	0.0520473	0.235165	56.7978
2084.5	90744.1	1470.27	89655.5	1477.52	0.0508863	0.23258	56.5276
2086	90870.8	1475.44	89795.4	1476.82	0.0476319	0.229553	56.9099
2087.5	91008	1480.8	89923.9	1473.36	0.0511743	0.226843	57.0025
2089	91137.2	1483.07	90055.9	1470.69	0.0509054	0.224372	56.7154
2090.5	91268.5	1486.91	90193.5	1471.73	0.0507366	0.222324	56.718
2092	91401.5	1484.47	90325.9	1463.27	0.0500362	0.220555	56.7847
2093.5	91537.4	1484.68	90454.4	1468.58	0.0516546	0.219615	56.3743
2095	91669.7	1481.94	90589.8	1465.57	0.0501887	0.219467	56.9069
2096.5	91805.9	1475.23	90704.1	1468.61	0.0535099	0.21864	56.604
2098	91934.1	1478.08	90839.1	1474.2	0.0531088	0.214441	55.8259
2099.5	92065.8	1484.16	91010.5	1480.9	0.0515903	0.20962	56.7696
2101	92204.5	1497.32	91146	1483.22	0.0521286	0.205045	56.7064
2102.5	92344.8	1499.6	91301.6	1487.9	0.0512486	0.200738	56.7399
2104	92490.6	1505.23	91456.8	1482.57	0.0514864	0.196677	56.7313
2105.5	92638.8	1510.04	91611.7	1486.63	0.0512415	0.192902	56.8999
2107	92790.5	1513.57	91762.6	1474.42	0.0511343	0.189436	56.726
2108.5	92945.4	1517.01	91913	1477.22	0.0510789	0.186184	57.1503
2110	93103.1	1515.4	92053.4	1482.96	0.05199	0.183198	57.5012
2111.5	93260.6	1515.28	92201.3	1497.27	0.0552553	0.180516	57.4013
2113	93411	1515.27	92358.2	1499.82	0.0550632	0.178004	56.9117
2114.5	93564	1512.96	92527.1	1506.72	0.057195	0.175636	57.5972
2116	93713.3	1510.56	92677.6	1511.2	0.0589453	0.173365	57.576
2117.5	93860.1	1509.19	92844	1514.69	0.060259	0.171275	57.4357
2119	94005.4	1509.34	93015	1518.6	0.0588165	0.169275	58.8196
2120.5	94156.1	1507.63	93160.1	1513.33	0.0572783	0.167425	58.7528
2122	94312.5	1502.81	93327.1	1516.58	0.0607375	0.165705	59.4296
2123.5	94461.6	1501.26	93477.5	1514.23	0.0592352	0.164327	59.904
2125	94615.7	1499.7	93629.3	1512	0.0575369	0.162901	60.1944
2126.5	94775.7	1498.1	93781.3	1509.4	0.0560862	0.16112	60.2135
2128	94941.7	1494.94	93937.5	1508.98	0.0572306	0.159915	59.5094
2129.5	95105.6	1494.11	94104.2	1509.86	0.0562147	0.158849	60.1717
2131	95273.6	1491.79	94254.3	1503.4	0.0574361	0.15763	60.3543
2132.5	95439.2	1494.38	94410.5	1501.83	0.0548461	0.156542	60.2363
2134	95613.9	1496	94571.5	1500.02	0.0546295	0.155633	59.6565
2135.5	95790.4	1496.81	94745.3	1498.76	0.0566153	0.155496	59.2028
2137	95960.8	1503.66	94918.9	1494.99	0.0536371	0.155768	59.2548
2138.5	96140.3	1503.96	95080.4	1494.62	0.0556568	0.15567	59.4648
2140	96313.4	1507.59	95244.8	1491.31	0.0536585	0.155815	59.1986
2141.5	96492.8	1504.29	95414.5	1494.12	0.0573501	0.156166	58.5549
2143	96660.3	1508.31	95597.1	1496.06	0.0541836	0.156859	58.735
2144.5	96836.8	1508.07	95765.3	1495.45	0.055318	0.157826	59.0545
2146	97008.6	1508.72	95924.4	1504.08	0.0540074	0.1591	58.6268
2147.5	97183.2	1507.03	96101.1	1502.07	0.0555867	0.160514	58.5962
2149	97351.3	1508.11	96266.6	1510.02	0.0565756	0.161505	59.1031
2150.5	97515.5	1511.64	96427.6	1501.65	0.0555085	0.162038	58.6638
2152	97682.2	1513.69	96603.8	1508.78	0.0542208	0.162869	58.2228
2153.5	97852.1	1512.86	96780	1507.32	0.054593	0.163438	58.4016
2155	98020.2	1512.35	96946.2	1509.52	0.0561862	0.163947	57.9738
2156.5	98183	1512.84	97124.4	1507.23	0.0557464	0.164583	58.4276
2158	98346.5	1514.69	97282.2	1506.7	0.0553262	0.165943	58.6957
2159.5	98509.9	1515.85	97434.5	1509.8	0.0539211	0.167036	58.1858
2161	98676.5	1515.8	97602.3	1513.62	0.0553089	0.167717	57.8996
2162.5	98838.2	1517.5	97771.6	1513.78	0.0564294	0.168181	57.8612
2164	98996.2	1518.67	97938.3	1511.87	0.05559	0.168686	58.3282
2165.5	99156.2	1518.28	98091.9	1512.77	0.0569036	0.16927	58.0512
2167	99311.9	1520.78	98256.5	1512.9	0.0559657	0.169569	57.6465
2168.5	99470	1524.32	98425.5	1516.26	0.053013	0.168786	57.6133
2170	99637.6	1522.31	98596	1515.44	0.0540895	0.167639	57.7212
2171.5	99803	1523.58	98765.2	1516.2	0.0524601	0.166216	58.0004
2173	99975	1518.12	98928.7	1519.12	0.0543873	0.165179	57.5347
2174.5	100142	1520.77	99102.5	1517.97	0.0535734	0.164726	57.7014
2176	100312	1517.62	99259.5	1518.87	0.0537466	0.164336	57.1344
2177.5	100482	1519.62	99428.9	1525.03	0.0542944	0.163931	56.4537
2179	100650	1516.89	99609.2	1521.92	0.0531921	0.162776	56.436
2180.5	100824	1516.26	99782.5	1524.27	0.0550477	0.161898	55.9812
2182	100992	1518.93	99967.8	1518	0.0569551	0.161092	56.1954
2183.5	101155	1522.27	100136	1520.88	0.057298	0.159913	56.0313
2185	101319	1522.5	100317	1517.54	0.0569853	0.158656	56.0774
2186.5	101485	1520.69	100493	1519.76	0.0596988	0.157018	55.7097
2188	101645	1531.11	100680	1516.36	0.0593494	0.155584	55.6033
2189.5	101807	1522.92	100863	1516.23	0.0582703	0.155994	56.2845
2191	101972	1536.33	101016	1519.43	0.0648828	0.15721	56.55
2192.5	102120	1539.57	101167	1522.52	0.0597257	0.158364	56.0715
2194	102278	1548.79	101332	1522.5	0.0622764	0.159323	57.3263
2195.5	102429	1552.39	101470	1519.7	0.0605744	0.158069	57.0811
2197	102586	1557.26	101643	1531.23	0.061014	0.155915	57.4507
2198.5	102744	1566.02	101812	1522.69	0.0572292	0.154949	57.3811
2200	102913	1568.47	101983	1537.23	0.0503501	0.154369	56.9611
2201.5	103106	1562.25	102141	1539.95	0.0520466	0.153687	57.0146
2202.99	103292	1561.21	102301	1550.28	0.0504444	0.153099	56.6339
2204.5	103488	1556.67	102464	1552.96	0.0507877	0.151831	55.9786
2206	103682	1553.2	102639	1559.11	0.0511762	0.149952	54.7216
2207.5	103878	1552.77	102833	1571.9	0.0524227	0.147623	53.3984
2209	104071	1554.36	103057	1562.29	0.0529535	0.145573	53.6968
2210.5	104266	1555.36	103254	1562.12	0.0525828	0.143855	53.6989
2212	104464	1556.67	103458	1557.22	0.0522944	0.141294	53.8459
2213.5	104667	1562.97	103668	1553.23	0.0525975	0.138133	54.0448
2215	104874	1575.46	103882	1552.76	0.0512054	0.135995	54.5617
2216.5	105089	1568.8	104082	1554.45	0.0485733	0.134068	55.0395
2218	105320	1578.76	104282	1555.44	0.0540499	0.132686	55.0135
2219.5	105529	1588.54	104491	1556.85	0.0519157	0.131594	55.072
2221	105748	1601.94	104702	1564.18	0.0522779	0.130829	55.2672
2222.5	105968	1626.03	104912	1578	0.0524492	0.130399	55.2001
2224	106187	1650.41	105136	1566.38	0.0503666	0.129574	54.8157
2225.5	106417	1675.06	105375	1582.48	0.0506379	0.128106	55.4576
2227	106648	1704.63	105587	1590.82	0.0498944	0.126989	54.8452
2228.5	106885	1719	105826	1607.32	0.0454101	0.12812	54.8345
2230	107142	1733.99	106037	1635.23	0.0434909	0.129944	53.805
2231.5	107408	1738.85	106265	1658.29	0.0396963	0.131825	53.3729
2233	107695	1738.78	106488	1682.95	0.0415115	0.132546	53.0341
2234.5	107967	1749	106722	1714.71	0.0412194	0.13191	52.0805
2236	108243	1752.01	106993	1721.86	0.0421046	0.132267	51.012
2237.5	108512	1760.52	107276	1744.79	0.0433464	0.132452	50.2002
2239	108774	1756.53	107571	1731.55	0.0427525	0.134992	49.8436
2240.5	109034	1749.45	107835	1746.96	0.0445172	0.136733	50.5771
2242	109280	1741.19	108075	1750.67	0.0457996	0.138395	51.1624
2243.5	109517	1735.18	108318	1752.61	0.0459438	0.139979	51.7086
2245	109750	1729.95	108558	1762.38	0.045084	0.141495	52.5737
2246.5	109985	1721.68	108784	1756.24	0.0445504	0.142892	53.025
2248	110221	1709.98	109020	1749.91	0.0455903	0.143761	53.9384
2249.5	110450	1699.54	109238	1742.35	0.0480581	0.143937	54.8198
2251	110666	1697.3	109455	1736.32	0.0470355	0.143561	55.2813
2252.5	110889	1692.86	109682	1732.11	0.0470747	0.142995	55.5461
2254	111111	1684.49	109916	1724.67	0.0484922	0.142321	55.6607
2255.5	111329	1677.8	110154	1714.39	0.0499951	0.142483	56.6129
2257	111539	1673.06	110363	1700.49	0.0503042	0.143001	57.3499
2258.5	111748	1667.78	110565	1698.29	0.0503031	0.143206	57.3921
2260	111956	1663.6	110782	1696.18	0.050148	0.143356	58.1588
2261.5	112165	1663.54	110987	1689.79	0.0492686	0.143261	58.6806
2263	112377	1662.85	111197	1680.83	0.0464405	0.141452	59.0213
2264.5	112606	1658.6	111420	1675.69	0.0469768	0.140106	59.3732
2266	112833	1657.56	111634	1670.96	0.0481393	0.139091	59.4353
2267.5	113057	1657.79	111850	1664.95	0.0486769	0.138451	59.003
2269	113280	1654.2	112072	1662.13	0.0481243	0.137983	59.1854
2270.5	113506	1647.8	112283	1665.33	0.0520098	0.137678	58.5706
2272	113715	1650.2	112520	1659.12	0.0491456	0.137879	57.7642
2273.5	113937	1640.9	112763	1657.64	0.0522382	0.138356	57.6649
2275	114144	1637.99	112986	1657.37	0.053424	0.138224	57.9749
2276.5	114347	1631.24	113204	1658.64	0.0577363	0.137742	57.9704
2278	114536	1629.46	113433	1645.29	0.0584886	0.136999	57.5631
2279.5	114723	1628.22	113661	1653.16	0.0586708	0.135919	58.3267
2281	114911	1629.33	113874	1641.52	0.0536141	0.134516	57.4845
2282.5	115119	1628.17	114112	1639.19	0.0576389	0.132779	58.1252
2284	115315	1629.18	114318	1631.53	0.0585582	0.131003	58.6626
2285.5	115511	1627.11	114513	1629.65	0.0579963	0.129243	59.0165
2287	115711	1629.28	114707	1628.12	0.0643138	0.127275	59.0319
2288.5	115894	1633.68	114910	1629.34	0.0654369	0.124336	57.7112
2290	116079	1638.83	115162	1627.94	0.0687912	0.121089	58.4313
2291.5	116259	1649.56	115371	1629.63	0.0708245	0.117728	58.4566
2293	116439	1671.51	115593	1625.63	0.0667318	0.1146	58.8914
2294.5	116635	1704.51	115803	1632.12	0.0687857	0.11188	59.6761
2295.98	116827	1722.64	115993	1635.37	0.068268	0.108922	59.7664
2297.5	117031	1747.66	116197	1643.65	0.0714826	0.106087	60.9294
2299	117229	1764.93	116383	1661.57	0.0737071	0.103039	60.0145
2300.5	117427	1792.44	116611	1702.25	0.0809884	0.100625	59.7124
2302	117611	1828.71	116829	1722.79	0.0827794	0.0984125	60.2964
2303.5	117795	1855.68	117040	1748.73	0.0798322	0.0963645	60.7552
2305	117990	1890.88	117248	1766.56	0.0828181	0.0943876	62.4139
2306.5	118182	1925.17	117440	1794.38	0.0808262	0.0925588	62.9344
2308	118382	1962.32	117632	1833.03	0.0807187	0.090783	62.563
2309.5	118587	1999.87	117837	1861.48	0.0795167	0.0891909	63.0516
2311	118799	2034.57	118038	1900.11	0.0798495	0.087711	62.5951
2312.5	119013	2074.04	118250	1937.05	0.0817351	0.0863621	62.4066
2314	119225	2113.02	118466	1978.23	0.0777281	0.0850604	62.3586
2315.5	119452	2148.03	118685	2017.37	0.0789303	0.0837203	62.7695
2317	119679	2186.91	118905	2050.7	0.0774178	0.0823728	62.9105
2318.5	119914	2225.67	119129	2099.12	0.0753846	0.0810102	63.1743
2320	120160	2257.74	119359	2132.22	0.0761858	0.0797065	62.5459
2321.5	120407	2284.89	119606	2174.02	0.0784589	0.0784962	62.748
2323	120650	2313.82	119848	2216.48	0.0776812	0.0776012	62.381
2324.5	120899	2332.35	120104	2251.83	0.0805889	0.0766572	62.444
2326	121142	2354.14	120360	2278.92	0.0800999	0.075711	62.1977
2327.5	121389	2375.04	120617	2311.37	0.0770195	0.0748039	62.8437
2329	121650	2381.12	120866	2329.37	0.0797591	0.0739586	62.8611
2330.5	121904	2393.54	121118	2351.94	0.0766408	0.0730166	63.5736
2332	122172	2405.21	121366	2374.53	0.0776454	0.072045	63.6119
2333.5	122440	2398.09	121635	2380.42	0.0784022	0.0711282	63.8777
2335	122709	2392.69	121897	2393.21	0.0793906	0.0703364	64.0239
2336.5	122978	2373.62	122172	2405.23	0.0744734	0.0695509	64.0992
2338	123267	2352.85	122448	2397.89	0.0762676	0.0687693	65.1232
2339.5	123553	2329.27	122713	2392.61	0.0758233	0.0680032	64.3542
2341	123844	2294.07	123002	2371.91	0.0735774	0.067249	64.5063
2342.5	124148	2258.9	123298	2350.64	0.0794824	0.0665654	64.6347
2344	124431	2221.85	123592	2326.06	0.0783679	0.0660155	64.3676
2345.5	124721	2179.46	123895	2287.66	0.0753437	0.0655859	65.031
2347	125025	2135.32	124192	2253.85	0.0758518	0.0651442	65.5922
2348.5	125328	2092.12	124475	2215.97	0.0781217	0.0647922	65.2906
2350	125624	2047.77	124776	2171.36	0.0758372	0.0644702	64.7425
2351.5	125931	2006.54	125091	2125.76	0.0769175	0.0641891	64.9207
2353	126235	1969.72	125394	2082.81	0.0767052	0.0639285	65.2983
2354.5	126541	1934.52	125691	2037.65	0.0752661	0.0637515	64.6106
2356	126854	1906.74	126008	1996.54	0.0761062	0.0636512	64.5297
2357.5	127163	1878.32	126315	1960.24	0.0739757	0.063569	64.7312
2359	127482	1857.23	126621	1925.37	0.0779158	0.0635078	64.2991
2360.5	127785	1841.66	126940	1899.84	0.078509	0.0634009	64.4694
2362	128087	1830.24	127251	1869.87	0.080122	0.0633316	64.538
2363.5	128382	1827.51	127566	1852.67	0.0821781	0.0633241	65.5316
2365	128671	1827.3	127856	1838.14	0.0793626	0.0634225	65.6783
2366.5	128969	1825.42	128153	1827.99	0.0788234	0.0635028	66.6318
2368	129268	1832.58	128434	1827.41	0.0821074	0.0636667	66.189
2369.5	129555	1845.88	128727	1827.27	0.0797741	0.0639462	66.0801
2371	129849	1867.88	129023	1825	0.0795903	0.0643113	66.4577
2372.5	130142	1904.44	129311	1833.92	0.0795183	0.0647465	65.8001
2374	130434	1958.52	129602	1848.18	0.0787764	0.0652749	65.4467
2375.5	130725	2030.93	129894	1871.43	0.0758814	0.0658607	65.0453
2377	131025	2134.47	130184	1910.02	0.0725042	0.0665856	64.3946
2378.5	131336	2266.82	130475	1966.55	0.0668154	0.0675012	63.3226
2380	131669	2436.93	130770	2042.54	0.0631144	0.0683303	62.2122
2381.5	132017	2678.23	131077	2153.07	0.0598234	0.0692179	61.0932
2383	132379	2972.97	131396	2293.22	0.052637	0.070374	60.5377
2384.5	132784	3363.03	131724	2466.26	0.0468748	0.0715621	59.5121
2386	133231	3846.97	132075	2720.48	0.0403253	0.0727316	57.8869
2387.5	133742	4345.11	132457	3037.95	0.0347581	0.0739361	56.2612
2389	134326	4931.24	132885	3463.96	0.0340185	0.0751533	54.2303
2390.5	134913	5548.04	133376	4007.29	0.03192	0.0764362	52.5508
2392	135528	6126.01	133930	4518.32	0.0300472	0.077792	52.1507
2393.5	136169	6663.33	134499	5112.11	0.0303679	0.0792909	51.2399
2395	136792	7131.53	135092	5736.96	0.0316492	0.0807596	50.2191
2396.5	137379	7606.5	135718	6295.78	0.0339259	0.0820363	50.2586
2398	137918	8064.09	136326	6790.74	0.033905	0.0831196	50.8624
2399.5	138450	8520.5	136899	7209.38	0.033095	0.0840945	51.6627
2401	138989	8919.52	137435	7652.68	0.032204	0.0849057	51.6424
2402.5	139538	9349.53	137959	8098.92	0.0330877	0.0856001	51.4396
2404	140067	9754.58	138485	8550.32	0.0330907	0.0860998	50.921
2405.5	140594	9747.16	139032	8950.51	0.0332351	0.0866999	51.3267
2407	141114	10130.2	139555	9363.44	0.0338936	0.0871464	51.2627
2408.5	141622	10994.6	140079	9763.34	0.0314873	0.0875148	51.2339
2410	142167	11921	140600	9746.98	0.032366	0.087869	51.4188
2411.5	142694	12818.7	141108	10119.5	0.0339948	0.0881195	51.5389
2413	143195	13670.9	141608	10970.6	0.034376	0.0882446	50.5173
2414.5	143689	14512.5	-1	-1	0.033729	0.0883483	-1
2416	144193	15369.3	-1	-1	0.0340008	0.0883772	-1

## Sheet: TALDICE
TALDICE									Only build back to 150 ka. Do not use it prior to 150 ka.
Depth (m)	Ice age (a B1950)	Ice age std (a)	Gas age (a B1950)	Gas age std (a)	Accu. Rate (m ie)	Thinning	LIDIE (m ie)
0	-54	0.273987	-1	-1	0.0971415	1.0052	-1
1	-50.0022	0.550583	-1	-1	0.0971534	1.00507	-1
2	-45.8934	0.800815	-1	-1	0.0971638	1.00492	-1
3	-42.1175	1.06151	-1	-1	0.0971746	1.00474	-1
4	-38.1193	1.34634	-1	-1	0.0971859	1.00454	-1
5	-33.6763	1.64727	-1	-1	0.0971975	1.00431	-1
6	-28.8997	1.96344	-1	-1	0.0972092	1.00405	-1
7	-23.7891	2.28055	-1	-1	0.0972201	1.00377	-1
8	-18.5665	2.61141	-1	-1	0.0972309	1.00344	-1
9	-13.0095	2.94874	-1	-1	0.0972411	1.00309	-1
10	-7.22866	48.6553	-1	-1	0.0972499	1.00272	-1
11	-1.44624	4.0949	-1	-1	0.0972582	1.00232	-1
12	4.56052	30.5922	-1	-1	0.0972651	1.00191	-1
13	10.6805	54.0352	-1	-1	0.0972708	1.00149	-1
14	16.6914	53.3061	-1	-1	0.0972753	1.00105	-1
15	22.8161	57.9161	-1	-1	0.0972786	1.00059	-1
16	29.1661	60.6382	-1	-1	0.0972363	1.00011	-1
17	35.745	60.3813	-1	-1	0.0879459	0.999589	-1
18	42.8992	60.1019	-1	-1	0.0879449	0.999048	-1
19	50.0575	59.8224	-1	-1	0.0879422	0.9985	-1
20	57.2198	59.5427	-1	-1	0.0879378	0.997925	-1
21	64.7574	61.0256	-1	-1	0.0879315	0.997319	-1
22	72.3	62.7288	-1	-1	0.0879236	0.996688	-1
23	79.8482	59.2835	-1	-1	0.0879138	0.995988	-1
24	87.4024	57.6855	-1	-1	0.087902	0.995274	-1
25	95.2111	62.5082	-1	-1	0.0878881	0.99459	-1
26	103.15	61.0813	-1	-1	0.0878728	0.993889	-1
27	110.972	60.4477	-1	-1	0.0878561	0.993177	-1
28	118.802	59.8136	-1	-1	0.0878826	0.992435	-1
29	126.634	61.4872	-1	-1	0.0896518	0.991674	-1
30	134.562	64.9027	-1	-1	0.0896313	0.990887	-1
31	142.376	67.1943	-1	-1	0.0896099	0.990103	-1
32	150.565	67.8083	-1	-1	0.0895891	0.989313	-1
33	158.762	68.2699	-1	-1	0.0895684	0.988532	-1
34	167.09	64.3301	-1	-1	0.0895485	0.987737	-1
35	175.426	64.7124	-1	-1	0.0895293	0.986938	-1
36	183.649	61.6262	-1	-1	0.0895104	0.986124	-1
37	192.002	64.6245	-1	-1	0.0894918	0.985292	-1
38	200.488	67.67	-1	-1	0.0894739	0.98447	-1
39	208.982	70.7187	-1	-1	0.0893903	0.983648	-1
40	217.368	69.12	-1	-1	0.0878431	0.98284	-1
41	226.286	69.6275	-1	-1	0.0878265	0.982033	-1
42	235.212	70.0969	-1	-1	0.0878102	0.981236	-1
43	244.399	72.6941	-1	-1	0.0877947	0.98046	-1
44	253.469	74.701	-1	-1	0.0877797	0.979705	-1
45	262.674	74.8304	-1	-1	0.0877654	0.978966	-1
46	271.887	74.4385	-1	-1	0.087752	0.978264	-1
47	280.982	72.429	-1	-1	0.0877391	0.977587	-1
48	290.211	74.1057	-1	-1	0.0877266	0.976919	-1
49	299.574	76.8487	-1	-1	0.0874936	0.976254	-1
50	308.968	78.8529	-1	-1	0.0842948	0.9756	-1
51	318.858	80.4192	-1	-1	0.0842844	0.974963	-1
52	328.755	77.2583	-1	-1	0.0842748	0.974332	-1
53	338.659	77.4681	-1	-1	0.0842657	0.97372	-1
54	348.703	78.2318	-1	-1	0.0842575	0.973116	-1
55	358.622	78.986	-1	-1	0.0842498	0.972519	-1
56	368.812	80.7313	-1	-1	0.0842426	0.971927	-1
57	379.275	82.5255	-1	-1	0.0842361	0.971346	-1
58	389.48	81.3377	-1	-1	0.0839313	0.970784	-1
59	399.993	80.787	-1	-1	0.0804202	0.970243	-1
60	410.972	80.6312	-1	-1	0.0804151	0.969712	-1
61	421.819	82.1229	-1	-1	0.0804104	0.96921	-1
62	432.811	80.0402	-1	-1	0.0804063	0.968717	-1
63	443.809	77.9563	-1	-1	0.0804026	0.968238	-1
64	454.813	75.8713	-1	-1	0.0803993	0.967766	-1
65	465.962	73.5675	-1	-1	0.0803957	0.967291	-1
66	477.396	71.1652	-1	-1	0.0806795	0.966817	-1
67	488.656	84.9866	-1	-1	0.0848541	0.966357	-1
68	499.368	84.4346	-1	-1	0.0848492	0.965894	-1
69	510.217	81.8531	-1	-1	0.0848421	0.965406	-1
70	521.073	81.281	-1	-1	0.0848332	0.964915	50.3495
71	531.803	85.0654	-13.7691	48.1813	0.0848221	0.964469	50.3323
72	542.805	89.6413	-5.36092	48.7906	0.0848091	0.96404	48.9988
73	553.68	86.5286	14.1921	51.4249	0.0847936	0.963642	50.6145
74	564.828	76.9522	8.91737	55.3458	0.0848643	0.963249	44.0823
75	575.971	83.9618	80.5848	53.4747	0.0868986	0.962829	50.5405
76	586.857	84.558	26.5673	60.7397	0.0868765	0.96241	48.2931
77	597.881	85.1675	58.047	59.5104	0.0868522	0.961972	47.1608
78	608.913	82.6992	79.5494	61.6399	0.0868258	0.961524	48.7602
79	619.953	83.5303	73.5396	63.0087	0.0867966	0.960996	47.3584
80	631.264	84.2038	97.9112	64.1758	0.0867653	0.960419	48.2132
81	642.454	84.8702	99.5587	61.3722	0.0867323	0.959804	46.1437
82	653.527	89.5911	131.067	63.1988	0.0866527	0.959156	48.0874
83	664.747	89.0617	121.693	59.5794	0.0851832	0.958477	43.1294
84	676.169	88.5519	183.046	61.4097	0.0851438	0.957776	44.4584
85	687.737	89.7089	180.032	64.9236	0.0851034	0.957058	49.4903
86	699.32	91.4557	138.697	66.9184	0.0850617	0.956333	48.6289
87	711.05	91.7262	158.498	68.4031	0.0850197	0.955664	48.8851
88	722.795	89.623	166.615	64.3084	0.084977	0.95502	45.5315
89	734.687	92.1933	211.489	66.0152	0.0849341	0.954361	46.7069
90	746.593	91.8449	210.213	70.6996	0.084968	0.953718	47.0431
91	758.502	89.888	217.449	69.1629	0.0858905	0.953086	48.8656
92	770.291	95.4214	209.629	70.9507	0.0858476	0.952451	46.3228
93	781.962	93.3637	247.97	74.6237	0.0858043	0.951821	48.0932
94	793.646	91.3036	240.066	70.3522	0.0857594	0.951153	45.0638
95	805.61	89.8006	284.169	71.725	0.0857138	0.950382	45.3419
96	817.59	93.0247	292.72	75.3806	0.085668	0.949548	48.5525
97	829.454	92.9547	269.669	74.9287	0.0856217	0.948679	47.5855
98	841.336	92.3625	291.452	74.5946	0.0861332	0.94779	47.3136
99	853.024	91.78	305.839	78.1905	0.0906201	0.946898	47.2722
100	864.398	92.5316	318.505	80.5317	0.0905728	0.945985	48.8316
101	875.662	87.164	312.97	79.6998	0.0905256	0.945065	48.3603
102	886.815	93.2255	330.129	76.8194	0.0904775	0.944137	43.9789
103	898.113	89.7961	391.546	80.907	0.0904285	0.943211	47.9473
104	909.555	90.4229	358.645	78.9878	0.0903791	0.942426	43.9852
105	921.013	88.3884	417.076	80.5445	0.0903185	0.941684	44.874
106	932.488	89.3943	419.285	82.6029	0.0854134	0.940977	46.0261
107	944.63	90.464	418.355	84.8509	0.0853623	0.940264	50.2416
108	956.924	99.4403	381.748	82.9496	0.0853109	0.939557	44.948
109	969.235	97.2399	456.683	75.5169	0.085259	0.938832	42.4695
110	981.563	96.3962	498.847	84.5584	0.0852074	0.938111	45.3659
111	993.772	95.5606	477.714	71.0984	0.0851542	0.937388	39.265
112	1006.27	93.8758	578.077	82.0751	0.0851019	0.936636	46.2221
113	1018.46	92.1671	493.149	89.1861	0.0849517	0.935875	47.8639
114	1030.7	94.4056	486.715	83.1717	0.0838911	0.935103	46.232
115	1043.11	91.0196	517.668	80.0802	0.0838375	0.934318	43.3363
116	1055.55	91.261	562.576	74.4502	0.0837835	0.933585	40.6174
117	1068.02	92.2348	605.057	82.3907	0.083729	0.932903	44.5529
118	1080.52	90.6404	573.294	86.3594	0.0836741	0.93232	47.7423
119	1093.04	92.003	549.371	92.3789	0.0836187	0.93177	50.3747
120	1105.59	93.3683	531.967	85.1232	0.0836492	0.931218	46.1416
121	1118.15	94.7349	591.517	87.6304	0.0847252	0.930626	47.3724
122	1130.57	91.4566	589.868	85.4095	0.0846685	0.929998	45.9572
123	1143.01	90.9182	617.407	83.3787	0.0846113	0.929345	44.6217
124	1155.48	90.8079	644.64	85.0003	0.0845537	0.928666	45.377
125	1167.97	93.0386	648.33	85.2377	0.0844957	0.927812	44.1215
126	1180.49	94.5299	674.587	88.3938	0.0844373	0.926898	47.2028
127	1193.04	90.4546	652.523	89.6385	0.0844965	0.925929	46.4944
128	1205.6	88.1119	672.794	88.682	0.0871847	0.924946	45.4268
129	1217.79	89.5237	697.358	90.6711	0.0871253	0.923958	45.9448
130	1230	94.8354	704.097	93.3564	0.0870663	0.922974	47.3792
131	1242.25	93.7671	700.481	91.9199	0.0870078	0.921992	46.6454
132	1254.52	94.2941	721.351	89.311	0.0869497	0.921047	44.7384
133	1266.81	94.4384	755.685	88.8308	0.0868921	0.920139	44.9575
134	1279.14	94.7542	765.872	96.2005	0.0868338	0.919231	48.2431
135	1291.48	97.6229	741.257	93.6136	0.0861005	0.918262	47.4131
136	1303.95	100.193	763.422	91.7343	0.0808718	0.917241	45.8016
137	1317.25	103.12	793.982	91.2443	0.0808074	0.916172	45.5038
138	1330.57	97.8709	810.072	89.2466	0.0807409	0.915056	44.9376
139	1343.93	87.0065	829.274	92.9637	0.0806724	0.913889	46.86
140	1357.32	87.197	820.46	94.4667	0.0806017	0.912672	47.6382
141	1370.74	87.3881	824.572	86.5721	0.0805501	0.91142	45.462
142	1384.19	87.5795	861.32	86.5714	0.0887914	0.910112	45.8946
143	1396.42	87.7535	869.013	83.3031	0.0887159	0.908774	43.4408
144	1408.68	87.9279	907.264	87.0182	0.0886402	0.907414	46.573
145	1420.97	95.0626	886.345	93.3682	0.0885642	0.906036	49.5462
146	1433.29	101.61	867.185	97.9279	0.088488	0.904638	51.49
147	1445.64	93.2979	858.947	91.4848	0.0884116	0.903201	47.7846
148	1458.03	95.0663	910.484	91.804	0.0883349	0.901763	47.9625
149	1470.45	99.2904	921.025	88.3845	0.087804	0.900309	42.5011
150	1482.97	102.93	994.706	95.4967	0.0815771	0.898858	46.7526
151	1496.46	96.7672	960.178	97.8598	0.0814997	0.897412	48.0187
152	1510	105.354	959.197	101.818	0.081422	0.89597	50.1425
153	1523.57	101.999	948.686	90.8212	0.081344	0.894535	44.9741
154	1537.18	99.0909	1019.92	93.1387	0.0812658	0.893115	46.2493
155	1550.83	96.2858	1018.85	92.112	0.0811873	0.891712	45.1014
156	1564.51	93.4731	1045.19	90.4519	0.081161	0.890293	44.1406
157	1578.22	96.3665	1069.59	92.3572	0.0817631	0.888877	45.1404
158	1591.86	100.184	1071.7	101.002	0.0816839	0.887466	50.5122
159	1605.53	104.012	1024.41	96.1193	0.0816044	0.886061	47.1153
160	1619.24	108.424	1076.3	90.1817	0.0815246	0.884594	44.4662
161	1632.99	97.1279	1119.93	92.7441	0.0814446	0.8831	45.7321
162	1646.77	96.683	1119.17	94.8457	0.0813644	0.881595	46.7511
163	1660.6	96.2369	1121.23	91.8609	0.0816177	0.8801	45.0655
164	1674.41	102.907	1153.54	90.4624	0.0851289	0.878624	44.1878
165	1687.67	93.0441	1176.85	92.0621	0.0850508	0.877168	44.8848
166	1700.97	106.814	1182.53	95.9136	0.0849736	0.875733	46.8668
167	1714.3	105.276	1173.87	94.0919	0.0848973	0.874322	45.8253
168	1727.67	103.733	1199.01	87.3495	0.0848224	0.872962	43.5776
169	1741.07	102.187	1236.66	89.514	0.0847492	0.871678	44.6869
170	1754.51	100.636	1237.68	93.5707	0.0847087	0.870471	46.8602
171	1767.97	104.386	1227.17	97.1028	0.0852903	0.869318	48.6869
172	1781.36	102.084	1220.45	89.8319	0.0852221	0.868216	44.6515
173	1794.78	108.552	1277.16	94.2953	0.0851552	0.867157	47.0155
174	1808.23	103.001	1264.54	94.7245	0.0850895	0.866142	47.1603
175	1821.71	101.745	1275.99	93.2843	0.0850251	0.865172	45.9115
176	1835.21	99.5772	1302.63	100.214	0.0849619	0.864248	46.3648
177	1848.74	98.5434	1311.23	100.073	0.0849205	0.863312	46.1825
178	1862.29	105.497	1327.35	103.615	0.0858266	0.862383	47.8055
179	1875.72	109.804	1322.45	105.754	0.0857671	0.861482	48.7523
180	1889.17	98.2032	1325.43	106.598	0.0857087	0.860619	48.9857
181	1902.64	101.189	1336.72	86.904	0.0856516	0.859807	43.1948
182	1916.14	103.332	1415.41	89.7234	0.0855957	0.85908	44.5987
183	1929.65	104.006	1413.16	87.9918	0.0855411	0.858418	43.4632
184	1943.19	109.661	1438.06	90.7262	0.0854874	0.857818	44.8321
185	1956.75	110.466	1436.13	89.759	0.0845237	0.857295	44.214
186	1970.47	110.578	1455.49	94.0362	0.0777705	0.856825	46.491
187	1985.39	107.366	1443.77	93.1579	0.0777183	0.85636	45.8096
188	2000.33	108.516	1463.81	97.4137	0.077665	0.855897	44.0387
189	2015.29	109.23	1496.78	95.1362	0.0776113	0.855439	46.4556
190	2030.27	105.668	1482.46	102.688	0.0775575	0.855006	46.6325
191	2045.26	102.102	1494.2	108.315	0.077738	0.85461	53.9239
192	2060.27	101.481	1432.25	105.913	0.0826971	0.854256	48.0997
193	2074.41	102.784	1508.79	105.654	0.0826427	0.853894	47.7873
194	2088.57	103.639	1526.22	101.344	0.0825881	0.853528	45.5262
195	2102.76	102.323	1566.46	93.0726	0.0825335	0.853129	41.6529
196	2116.96	101.006	1625.63	97.3654	0.0824788	0.852653	43.7407
197	2131.18	103.374	1615.19	100.048	0.0824239	0.852129	44.9331
198	2145.42	104.85	1615.28	103.888	0.0823995	0.851579	46.6316
199	2159.67	108.865	1609.5	105.124	0.0829835	0.851009	46.9811
200	2173.83	108.053	1619.5	108.718	0.0829285	0.850445	48.6507
201	2188.01	108.117	1614.1	102.736	0.0828735	0.849895	45.5157
202	2202.21	107.28	1664.97	96.0959	0.0828184	0.84935	44.04
203	2216.42	105.376	1695.58	107.436	0.0827633	0.848839	47.4972
204	2230.66	101.606	1670.02	109.788	0.0827081	0.848381	48.5557
205	2244.91	100.017	1671.73	105.221	0.0828145	0.847926	48.4066
206	2259.15	100.392	1687.07	91.9529	0.0863734	0.847461	41.7452
207	2272.81	110.606	1776.31	98.4125	0.0863181	0.846987	44.549
208	2286.49	103.336	1758.11	100.221	0.0862627	0.846503	45.3974
209	2300.19	106.787	1762.2	99.7784	0.0862073	0.846003	45.4332
210	2313.9	109.106	1775.52	95.4585	0.0861519	0.845445	43.0641
211	2327.63	114.281	1816.21	102.629	0.0860964	0.84489	46.5381
212	2341.37	112.501	1790.5	108.717	0.0860308	0.844336	49.4301
213	2355.14	111.906	1771.51	107.21	0.0824376	0.84379	48.611
214	2369.52	113.714	1794.55	108.734	0.082382	0.843227	49.2155
215	2383.91	117.59	1801.51	103.315	0.0823264	0.842647	46.4309
216	2398.33	121.802	1847.05	97.6763	0.0822708	0.842061	44.0787
217	2412.76	117.475	1887.59	95.6415	0.0822154	0.84147	43.0205
218	2427.22	109.295	1913.43	97.5854	0.08216	0.840859	43.9159
219	2441.69	109.261	1917.12	105.424	0.0821548	0.840223	47.8985
220	2456.18	103.858	1885.87	110.805	0.0847404	0.839563	50.5789
221	2470.23	120.366	1869.49	109.189	0.0846853	0.838881	49.7291
222	2484.31	118.172	1892.98	104.415	0.0846304	0.83818	47.3426
223	2498.41	115.975	1933.96	103.518	0.0845757	0.837461	46.9437
224	2512.53	113.775	1952.5	109.857	0.0845213	0.836733	45.3761
225	2526.67	110.749	1985.87	107.262	0.084467	0.835969	48.2993
226	2540.83	115.101	1965.3	111.69	0.0844129	0.835167	50.9907
227	2555.01	118.291	1948.81	113.399	0.0838313	0.834331	46.8885
228	2569.31	121.507	2013.48	109.658	0.080215	0.833486	45.106
229	2584.27	120.803	2051.34	100.659	0.0801616	0.832642	43.6358
230	2599.25	121.722	2083.86	104.077	0.0801083	0.831778	45.1775
231	2614.26	114.586	2080.39	107.717	0.0800553	0.830904	46.8067
232	2629.29	113.476	2075.94	102.925	0.0800025	0.83003	44.4224
233	2644.35	112.712	2118.78	100.837	0.0799202	0.829159	43.3466
234	2659.44	111.947	2146.26	104.366	0.0793128	0.828295	45.0335
235	2674.66	111.176	2141.13	105.41	0.0792607	0.827431	45.4707
236	2689.91	112.969	2150.78	109.376	0.0792088	0.826567	47.3389
237	2705.18	112.724	2143.59	105.908	0.0791571	0.82571	45.9198
238	2720.48	118.013	2175.02	107.985	0.0791057	0.824857	46.8101
239	2735.81	110.673	2179.34	108.359	0.0790544	0.824009	46.8462
240	2751.16	112.383	2193.67	107.96	0.0789146	0.82317	46.5196
241	2766.55	117.931	2212.25	106.481	0.0780054	0.822345	45.6341
242	2782.14	117.677	2237.4	99.8202	0.0779549	0.821537	44.3652
243	2797.76	118.511	2266.7	100.59	0.0779046	0.820766	44.6161
244	2813.4	124.282	2278.02	103.638	0.0778545	0.820024	46.0106
245	2829.06	122.687	2276.51	104.004	0.0778047	0.819308	46.0917
246	2844.75	116.532	2289.73	103.221	0.0778239	0.818627	45.6398
247	2860.44	109.474	2308.93	112.63	0.0808313	0.817981	50.0929
248	2875.57	112.039	2273.15	111.165	0.0807822	0.817378	49.3186
249	2890.71	114.607	2295.91	103.934	0.0807332	0.816793	45.7127
250	2905.88	117.179	2350.49	111.321	0.0806845	0.816213	49.1979
251	2921.06	107.364	2325.48	114.559	0.0806361	0.815639	50.6442
252	2936.27	118.967	2323.41	102.356	0.0805878	0.81507	42.7546
253	2951.49	113.469	2429.42	106.164	0.0803048	0.814504	44.47
254	2966.78	119.826	2424.02	113.841	0.0767825	0.813941	47.869
255	2982.78	124.97	2398.87	121.96	0.076735	0.81338	51.4668
256	2998.8	127.323	2371.5	113.964	0.0766876	0.812819	47.7788
257	3014.85	121.741	2429.6	112.028	0.0766406	0.812256	46.8836
258	3030.91	122.384	2455	100.301	0.0765938	0.811692	42.8047
259	3046.99	123.027	2516.14	113.211	0.0765667	0.811125	48.7966
260	3063.1	114.066	2462.08	121.636	0.0815909	0.810528	50.9434
261	3078.22	110.07	2451.96	106.912	0.0815448	0.80991	45.7241
262	3093.36	111.703	2526.21	109.665	0.0814989	0.809268	46.9028
263	3108.52	114.757	2527.28	112.192	0.0814532	0.808598	48.0315
264	3123.7	117.932	2528.96	112.431	0.0814077	0.807901	45.6775
265	3138.91	122.203	2570.76	112.945	0.0813625	0.807175	45.9286
266	3154.14	122.407	2583.18	117.407	0.0811331	0.806424	47.8696
267	3169.42	121.407	2575.24	121.423	0.0770675	0.805646	49.625
268	3185.53	123.826	2569.61	121.574	0.0770236	0.804881	49.6757
269	3201.66	119.064	2584.52	121.6	0.0769802	0.804122	49.6751
270	3217.81	120.623	2600.08	121.729	0.0769371	0.803381	49.726
271	3233.99	121.634	2615.03	114.199	0.0768946	0.802657	45.987
272	3250.19	122.645	2676.01	111.108	0.0768524	0.80195	44.5898
273	3266.42	114.851	2708.87	112.408	0.0769075	0.801258	45.1838
274	3282.64	112.087	2717.36	119.507	0.0775726	0.800583	48.3182
275	3298.75	112.836	2694.76	113.617	0.0775318	0.799923	45.6448
276	3314.87	121.988	2743.29	107.088	0.0774914	0.799288	42.1061
277	3331.02	119.329	2803.15	116.544	0.0774513	0.798649	46.8018
278	3347.18	119.733	2760.73	118.827	0.0774109	0.798003	47.1969
279	3363.37	116.287	2771.8	117.124	0.0775538	0.79735	46.3604
280	3379.54	115.794	2798.3	118.54	0.0796929	0.796691	46.9639
281	3395.29	114.729	2806.9	120.79	0.0796518	0.796014	47.9262
282	3411.06	115.347	2811.05	124.521	0.0796102	0.795321	49.5049
283	3426.86	117.727	2807.57	122.263	0.0795681	0.794611	48.4315
284	3442.67	122.765	2837.15	121.863	0.0795255	0.793897	48.2296
285	3458.51	125.877	2855.9	108.704	0.0794823	0.793161	44.093
286	3474.38	127.064	2921.48	106.753	0.0788137	0.792396	43.1561
287	3490.39	127.061	2948.5	112.224	0.0748394	0.791601	45.546
288	3507.27	119.976	2935.44	119.422	0.0747946	0.790773	48.679
289	3524.17	122.092	2913.56	118.482	0.0747492	0.789911	48.1796
290	3541.11	124.211	2935.39	116.266	0.0747032	0.789012	44.8793
291	3558.08	127.333	2992.23	123.608	0.0746564	0.788066	47.9002
292	3575.07	123.437	2970.8	121.5	0.0747622	0.787068	46.9511
293	3592.07	118.775	2999.55	127.742	0.0758534	0.785998	49.5256
294	3608.84	118.002	2983.95	125.309	0.0758046	0.784867	48.4935
295	3625.65	117.227	3013.87	121.702	0.0757551	0.783674	46.9691
296	3642.49	116.733	3050.08	123.151	0.075704	0.782388	47.6095
297	3659.38	116.277	3059.09	115.125	0.0756514	0.781012	47.2509
298	3676.3	118.152	3079.68	109.684	0.0759693	0.779548	44.8433
299	3693.19	123.495	3124.35	118.067	0.0795471	0.778027	48.6801
300	3709.34	119.05	3095.26	111.984	0.0794928	0.776507	43.5474
301	3725.55	115.104	3172.4	110.262	0.0794393	0.774996	42.8796
302	3741.79	114.805	3197.92	118.571	0.0793869	0.773462	46.4262
303	3758.07	115.075	3170.89	121.311	0.0793353	0.77189	50.2332
304	3774.4	120.738	3142.34	123.178	0.0792847	0.770322	48.337
305	3790.78	121.594	3181.74	123.583	0.0792729	0.76878	48.4874
306	3807.19	121.35	3197.2	124.575	0.0792241	0.767249	48.8878
307	3823.64	118.143	3209.59	120.11	0.0791776	0.765739	46.9508
308	3840.13	116.832	3250.97	122.694	0.079134	0.764252	48.0654
309	3856.67	119.026	3254.51	116.879	0.0790944	0.762806	46.0832
310	3873.24	125.6	3296.29	109.763	0.0790592	0.761384	42.9422
311	3889.85	123.369	3352.11	115.173	0.0787917	0.759991	45.2158
312	3906.55	122.633	3341.3	125.17	0.0767499	0.758649	49.4072
313	3923.73	121.876	3307.09	123.27	0.0767281	0.757362	48.4654
314	3940.94	121.118	3335.77	118.546	0.076711	0.756283	46.5472
315	3958.17	120.958	3376.26	117.562	0.0766984	0.755311	47.4179
316	3975.43	121.327	3382.45	114.226	0.0766905	0.754448	45.9269
317	3992.72	130.978	3416.6	115.563	0.0762902	0.753707	46.5529
318	4010.11	133.318	3425.48	117.908	0.0718	0.753003	47.5799
319	4028.61	140.37	3429.58	117.369	0.0718006	0.752241	47.3778
320	4047.12	125.352	3448.38	125.119	0.0718014	0.751402	50.8801
321	4065.65	119.579	3423.2	119.426	0.0718009	0.750493	45.4325
322	4084.21	115.762	3505.63	119.772	0.0717989	0.749527	48.0777
323	4102.79	119.595	3489.82	128.219	0.072561	0.748509	49.0593
324	4121.21	123.392	3495.09	117.474	0.0793226	0.747447	44.499
325	4138.07	126.534	3570.64	125.264	0.0793163	0.74632	47.7262
326	4154.97	117.004	3547.57	129.063	0.0793085	0.745164	49.2826
327	4171.89	123.874	3545.8	124.798	0.0792993	0.743975	47.5513
328	4188.84	126.475	3585.66	119.07	0.0792885	0.742747	45.7142
329	4205.82	129.081	3626.42	117.192	0.0789078	0.741471	44.8773
330	4222.91	141.598	3654.73	116.383	0.0729628	0.740156	44.5735
331	4241.43	149.299	3676.45	117.932	0.0729472	0.738787	45.2099
332	4259.98	144.185	3686.42	125.355	0.0729301	0.737413	48.1127
333	4278.58	139.06	3668.2	130.364	0.0729112	0.736051	50.2817
334	4297.21	135.776	3659.21	116.011	0.0728908	0.734697	46.4445
335	4315.88	132.843	3723.56	115.14	0.0731328	0.733303	45.9137
336	4334.53	131.674	3747.18	114.706	0.0759675	0.731914	45.6734
337	4352.52	134.626	3767.4	115.392	0.0759444	0.730527	45.9026
338	4370.54	137.009	3782.05	116.757	0.0759209	0.729219	46.4643
339	4388.6	137.005	3792.7	124.174	0.0758969	0.72803	49.9171
340	4406.7	137.655	3768.83	123.638	0.0758725	0.726945	49.719
341	4424.83	142.537	3788.44	118.456	0.0760365	0.725981	47.374
342	4442.95	137.813	3833.66	116.19	0.0782916	0.725162	46.375
343	4460.56	143.531	3862.81	120.677	0.0782704	0.724506	48.5818
344	4478.19	138.988	3853.4	118.147	0.0782513	0.723783	47.4311
345	4495.85	132.707	3884.37	123.354	0.0782353	0.722968	49.725
346	4513.53	138.79	3874.08	125.995	0.0782225	0.722082	50.8778
347	4531.24	146.6	3877.59	127.154	0.0779497	0.721214	51.3729
348	4549.02	141.297	3889.01	123.406	0.0733841	0.720322	47.9401
349	4567.94	144.671	3949	120.762	0.0733812	0.719485	46.6634
350	4586.88	148.048	3982.8	121.484	0.0733818	0.718553	43.7147
351	4605.85	148.787	4039.5	127.724	0.0733854	0.71758	49.2366
352	4624.84	147.364	3986.99	130.207	0.0733922	0.716702	46.7333
353	4643.85	153.238	4037.98	137.215	0.0733929	0.715935	49.262
354	4662.88	148.784	4023.64	142.04	0.0733962	0.715247	50.8977
355	4681.93	143.698	4021.13	134.8	0.0734117	0.714643	47.8622
356	4700.99	141.301	4080.42	114.98	0.0734284	0.714145	44.2811
357	4720.06	138.753	4144.44	113.535	0.0734458	0.713704	43.4876
358	4739.14	135.952	4171.26	123.777	0.0734636	0.713325	47.7271
359	4758.22	148.251	4137.31	126.714	0.0735475	0.712995	48.7245
360	4777.29	156.956	4142.46	125.495	0.0740272	0.712713	48.0353
361	4796.24	136.212	4167.9	121.269	0.0740455	0.712427	45.7276
362	4815.2	143.469	4213.04	130.189	0.0740641	0.712115	45.353
363	4834.16	132.865	4235.94	128.189	0.0740834	0.711787	48.1657
364	4853.12	133.879	4218.06	139.953	0.0741691	0.711467	48.5674
365	4872.07	134.893	4231.17	142.368	0.0794966	0.711159	49.2478
366	4889.76	139.058	4241	149.417	0.0795167	0.710836	51.6023
367	4907.45	145.899	4228.82	143.602	0.0795366	0.710462	49.0364
368	4925.15	145.175	4281.59	138.23	0.0795562	0.710023	46.8914
369	4942.85	149.705	4329.05	130.775	0.0795756	0.70952	45.5214
370	4960.57	138.64	4365.16	136.296	0.0795948	0.709193	47.2996
371	4978.28	150.439	4360.72	135.974	0.078358	0.708879	46.8373
372	4996.28	151.153	4384.95	138.92	0.0711999	0.708589	47.568
373	5016.1	147.627	4393.92	134.214	0.0712182	0.708347	45.6149
374	5035.93	144.867	4437.31	141.093	0.0712362	0.708203	47.9597
375	5055.75	142.124	4425.46	142.706	0.0712539	0.708072	48.4345
376	5075.57	144.137	4437.6	137.639	0.0713281	0.707982	47.8546
377	5095.37	149.507	4462.67	144.51	0.0718088	0.707916	50.3992
378	5115.04	153.301	4448.61	137.997	0.0718265	0.707838	47.8367
379	5134.71	148.561	4498.32	131.831	0.0718446	0.707764	45.3188
380	5154.38	161.184	4547.69	141.059	0.0718629	0.707687	48.938
381	5174.04	156.884	4520.03	141.764	0.0717869	0.707621	49.0228
382	5193.73	150.084	4536.76	148.366	0.0661826	0.707541	51.741
383	5215.08	152.885	4520.46	143.151	0.066202	0.707449	46.5409
384	5236.43	157.715	4607.27	148.397	0.0662216	0.707344	48.5013
385	5257.78	153.424	4600.02	150.392	0.0662417	0.707206	49.2011
386	5279.13	147.76	4609.73	146.81	0.0664326	0.70705	47.9517
387	5300.42	153.735	4645.67	153.959	0.0747112	0.706853	50.5883
388	5319.36	144.978	4629.43	147.533	0.0747322	0.706621	48.3891
389	5338.29	136.221	4678.26	144.16	0.0747533	0.706361	47.2453
390	5357.23	140.957	4712.96	139.796	0.0747743	0.706062	45.7099
391	5376.17	143.702	4752.99	133.917	0.0747953	0.705739	43.874
392	5395.12	143.46	4796.93	134.238	0.0747308	0.705373	43.9109
393	5414.09	149.954	4815.7	143.722	0.0738887	0.704992	47.2885
394	5433.28	154.539	4789.84	154.54	0.0739124	0.704577	50.7134
395	5452.49	155.593	4763.34	159.641	0.0739381	0.704144	52.5213
396	5471.69	156.648	4758.55	149.164	0.0739657	0.703694	49.2833
397	5490.91	153.821	4821.26	132.174	0.0739284	0.703203	46.5252
398	5510.14	156.016	4877.09	135.161	0.0680424	0.702681	47.8293
399	5531.06	161.093	4879	136.357	0.0680755	0.702136	48.3745
400	5551.98	161.178	4890.37	140.583	0.0681092	0.701554	50.0071
401	5572.91	147.828	4888.3	135.408	0.0681435	0.700961	47.8902
402	5593.84	135.898	4932.78	133.825	0.0682545	0.700336	47.2021
403	5614.76	135.694	4959.55	136.535	0.0761481	0.699687	48.1546
404	5633.53	135.51	4966	149.92	0.0761839	0.699028	53.2107
405	5652.31	135.326	4921.69	150.329	0.0762202	0.698338	53.3488
406	5671.1	134.917	4938.33	153.273	0.076257	0.697637	48.7063
407	5689.89	149.831	5016.51	147.554	0.0762944	0.696947	51.6709
408	5708.7	142.213	4996.07	151.191	0.0756917	0.696248	48.2385
409	5727.67	158.838	5063.96	140.988	0.0697333	0.695552	45.1797
410	5748.29	153.985	5126.36	142.153	0.0697721	0.694868	45.7057
411	5768.92	152.81	5139.44	152.19	0.0698116	0.694179	49.3277
412	5789.55	151.634	5110.28	153.549	0.0698516	0.693508	49.8984
413	5810.2	150.458	5122.81	152.899	0.0700647	0.69284	49.7215
414	5830.8	154.405	5145.55	154.801	0.0718607	0.692193	50.3925
415	5850.9	163.092	5156.71	162.87	0.071901	0.691548	48.9247
416	5871.01	157.863	5197.28	148.858	0.0719409	0.690931	44.5172
417	5891.13	152.631	5284.27	161.201	0.0719803	0.690348	48.2632
418	5911.25	154.322	5250.99	161.006	0.0722015	0.689765	48.173
419	5931.33	149.934	5274.26	135.042	0.0749516	0.689191	44.9246
420	5950.69	162.474	5339.02	135.885	0.074989	0.688089	45.3122
421	5970.07	162.887	5353.84	140.466	0.0750256	0.687005	47.0499
422	5989.47	157.415	5351.1	135.62	0.075061	0.685958	45.2779
423	6008.9	158.774	5394	141.732	0.0750945	0.68493	47.5677
424	6028.34	159.731	5384.12	144.854	0.0744612	0.683941	48.7313
425	6047.97	160.287	5388.88	147.094	0.0710963	0.682972	49.492
426	6068.57	160.191	5398.88	149.302	0.071125	0.682035	49.6868
427	6089.18	166.679	5416.23	153.603	0.0711516	0.681139	51.7693
428	6109.82	165.868	5409.12	141.51	0.0711766	0.680265	46.7307
429	6130.47	166.388	5494.96	147.256	0.0715476	0.679437	48.7472
430	6151.04	159.285	5488.59	157.575	0.0733863	0.678632	48.0777
431	6171.12	158.318	5517.94	160.517	0.0734075	0.677865	48.955
432	6191.22	159.854	5527.19	161.41	0.0734288	0.677112	49.3042
433	6211.33	153.053	5543.93	166.31	0.0734499	0.676402	50.9251
434	6231.46	160.991	5542.65	160.144	0.0738477	0.675713	48.9977
435	6251.5	159.934	5591.57	135.92	0.0761616	0.675053	45.7397
436	6270.95	173.855	5654.62	135.304	0.0761825	0.674451	45.3896
437	6290.41	156.086	5678.37	134.746	0.0762042	0.673873	45.05
438	6309.88	154.945	5701.97	137.438	0.0762285	0.673338	45.5618
439	6329.37	153.803	5714.8	146.54	0.075896	0.672823	49.154
440	6348.95	153.825	5688.54	148.555	0.0730356	0.672339	49.7736
441	6369.31	155.465	5699.96	159.324	0.0730658	0.671868	48.9702
442	6389.68	157.107	5729.71	153.71	0.0730979	0.671429	50.9056
443	6410.06	158.453	5724.27	167.44	0.0731318	0.671001	51.2934
444	6430.44	157.228	5739.68	154.476	0.0731482	0.670602	47.1409
445	6450.82	171.519	5818.17	150.003	0.0730889	0.670214	46.6699
446	6471.24	165.618	5845.29	164.55	0.073128	0.669886	50.0282
447	6491.65	155.789	5820.22	147.007	0.0731681	0.669589	45.2564
448	6512.06	158.79	5905.15	149.232	0.0732095	0.66933	45.8874
449	6532.47	153.466	5917	159.115	0.0736222	0.669087	48.729
450	6552.77	146.742	5899.1	150.559	0.0768314	0.668882	47.5236
451	6572.23	149.647	5935.44	162.15	0.0768761	0.668655	49.3759
452	6591.68	154.521	5931.02	149.016	0.0769223	0.668438	46.6203
453	6611.13	153.225	5986.32	155.807	0.0769687	0.668228	48.7793
454	6630.57	152.236	5977.92	162.153	0.0769468	0.668053	50.7542
455	6650.03	158.229	5971.89	162.926	0.0762021	0.667903	50.8379
456	6669.68	155.193	5990.35	157.862	0.0762487	0.667789	48.5002
457	6689.32	156.253	6040.36	160.323	0.0762949	0.667708	46.8641
458	6708.95	165.1	6083.17	166.915	0.0763407	0.667599	48.7579
459	6728.57	165.246	6077.83	160.147	0.0759161	0.667465	46.5236
460	6748.3	161.069	6129.38	166.851	0.0688478	0.667297	48.5488
461	6770.07	153.39	6122.28	165.377	0.0688924	0.667113	48.2837
462	6791.83	148.401	6146.71	159.493	0.0689367	0.66685	47.651
463	6813.58	152.475	6175.62	158.102	0.0689805	0.666542	47.302
464	6835.33	158.36	6200.69	160.919	0.0693186	0.666192	48.3584
465	6856.98	164.219	6206.98	149.691	0.0712292	0.665796	46.4622
466	6878.07	158.987	6252.77	160.291	0.0712718	0.665364	48.7683
467	6899.16	156.675	6242.51	157.421	0.0713139	0.6649	49.5257
468	6920.25	159.629	6252.87	156.288	0.0713556	0.664453	49.3174
469	6941.34	162.584	6275.44	178.222	0.0710225	0.664052	54.7334
470	6962.54	165.555	6224.5	163.24	0.069338	0.663927	51.5164
471	6984.26	166.288	6286.46	156.318	0.0693784	0.663751	48.8575
472	7005.98	159.907	6340.54	153.147	0.0694184	0.663514	45.9299
473	7027.69	156.05	6400.38	159.349	0.0696259	0.663023	48.0561
474	7049.35	154.704	6392.49	157.333	0.0711373	0.662284	47.5994
475	7070.58	154.036	6419.75	157.556	0.071176	0.661607	47.7962
476	7091.81	157.111	6438.14	149.706	0.0712143	0.660977	45.2072
477	7113.06	159.648	6494.08	163.48	0.0712521	0.660329	49.8427
478	7134.31	153.664	6452.61	174.588	0.0714381	0.659674	53.5427
479	7155.53	154.99	6423.9	163.612	0.0722578	0.658991	50.0537
480	7176.53	155.513	6491.96	155.642	0.0722943	0.65805	47.917
481	7197.55	156.071	6541.97	150.987	0.0723304	0.657052	48.5979
482	7218.59	150.517	6554.11	146.217	0.072366	0.656037	47.1309
483	7239.66	151.996	6593.25	154.135	0.0723913	0.65503	50.1509
484	7260.75	153.476	6575.14	158.615	0.072426	0.654189	51.7928
485	7281.85	157.759	6574.52	150.081	0.0724602	0.653569	48.6891
486	7302.97	154.952	6634.04	152.059	0.0724939	0.652816	49.3769
487	7324.1	160.281	6645.47	155.585	0.0726463	0.651918	50.6699
488	7345.21	164.184	6649.39	158.398	0.0734146	0.650952	51.2293
489	7366.14	148.739	6662.84	154.823	0.0734451	0.649676	50.2904
490	7387.1	152.312	6695.74	156.601	0.0734743	0.648304	51.2085
491	7408.09	155.892	6705.04	165.071	0.0734522	0.646979	49.1249
492	7429.13	154.919	6753.03	157.297	0.0718338	0.645901	51.5127
493	7450.69	162.045	6742.93	165.352	0.0718587	0.644862	49.3646
494	7472.27	158.317	6795.45	147.57	0.0718822	0.643838	44.9236
495	7493.87	152.607	6879.68	154.83	0.0719044	0.642728	47.4942
496	7515.51	152.846	6866.98	157.492	0.0718463	0.641468	48.5075
497	7537.21	153.075	6875.62	165.292	0.0713888	0.640116	51.233
498	7559.09	155.328	6861.31	165.389	0.0714112	0.638876	51.3024
499	7581.01	158.761	6882.8	154.383	0.0714347	0.63764	46.2602
500	7602.97	158.539	6973.46	157.278	0.0712497	0.636396	47.1912
501	7625.02	160.308	6983.56	166.62	0.0685065	0.635197	50.0986
502	7648	161.587	6966.4	166.095	0.0685337	0.63388	49.863
503	7671.02	158.134	6992.79	162.25	0.0685619	0.632492	48.7953
504	7694.08	156.379	7030.67	155.521	0.0686419	0.630939	47.6513
505	7717.17	154.891	7069.2	153.836	0.070045	0.629184	47.2385
506	7739.86	151.946	7097.73	157.816	0.0700776	0.627321	48.7724
507	7762.61	149.201	7100.4	163.213	0.0701115	0.625451	50.7466
508	7785.41	151.117	7097.35	157.912	0.0701476	0.623526	49.2311
509	7808.28	156.751	7140.74	151.853	0.0701258	0.621515	47.8165
510	7831.22	152.959	7182.45	149.512	0.0698746	0.619438	47.1367
511	7854.32	153.457	7214.42	163.396	0.0699144	0.617518	52.0675
512	7877.49	154.78	7173.33	158.765	0.0699536	0.61555	50.4387
513	7900.71	148.229	7217.59	150.446	0.0703244	0.613546	47.4665
514	7923.89	149.867	7279.26	154.776	0.0721441	0.611534	49.0164
515	7946.55	153.777	7282.38	158.362	0.0721827	0.609501	50.2645
516	7969.28	156.381	7289.53	149.599	0.07222	0.607417	47.7349
517	7992.08	159.042	7345.32	164.204	0.07163	0.605277	52.3471
518	8015.14	163.329	7309.64	157.608	0.0671051	0.603084	50.6682
519	8039.85	162.254	7354.48	146.752	0.0671342	0.600835	46.7533
520	8064.64	161.176	7427.22	154.286	0.0671604	0.598537	49.5922
521	8089.52	149.353	7414.77	152.544	0.0678294	0.596267	48.0044
522	8114.25	146.464	7458.81	164.731	0.0721629	0.593996	53.4887
523	8137.57	146.626	7412.89	156.71	0.072185	0.59166	49.7508
524	8160.99	149.26	7484.46	152.503	0.0722076	0.58932	48.4997
525	8184.49	148.369	7524.59	152.946	0.0722612	0.586998	48.6193
526	8208.06	148.261	7547.29	153.179	0.0726088	0.584705	49.0207
527	8231.62	157.329	7566.49	158.985	0.0726337	0.582477	51.2104
528	8255.26	153.53	7562.84	156.01	0.0726597	0.580278	50.0716
529	8278.97	155.127	7601.75	158.441	0.0726569	0.578088	48.8864
530	8302.78	155.076	7642.01	161.672	0.0723213	0.575924	50.0383
531	8326.79	153.665	7652.18	161.528	0.0723516	0.573826	50.1748
532	8350.88	153.279	7675.83	157.268	0.0723834	0.571924	49.2863
533	8375.03	160.575	7712.83	155.466	0.0724266	0.569848	49.526
534	8399.26	160.498	7734.82	152.555	0.072664	0.567758	48.3758
535	8423.5	157.851	7774.79	147.731	0.0726989	0.565757	46.6279
536	8447.81	155.275	7822.5	157.602	0.0727341	0.563871	50.1529
537	8472.2	153.678	7801.88	156.367	0.0727898	0.562101	49.661
538	8496.64	152.812	7833.2	151.907	0.0744102	0.560354	48.2347
539	8520.62	153.637	7876.83	155.107	0.0744437	0.558305	49.0349
540	8544.68	162.196	7891.97	147.611	0.0744752	0.556253	47.553
541	8568.82	162.11	7936.32	150.745	0.074505	0.554328	48.4472
542	8593.03	163.5	7949.83	154.75	0.0744005	0.552529	49.7524
543	8617.36	159.398	7958.15	155.062	0.0738358	0.550829	49.8408
544	8641.95	153.594	7981.73	157.857	0.0738599	0.549347	50.5303
545	8666.59	147.985	7997.64	159.679	0.0738834	0.548034	51.3726
546	8691.29	159.905	8011.59	163.483	0.0738862	0.546808	49.3028
547	8716.04	168.651	8065.66	161.131	0.0738071	0.545605	49.0331
548	8740.87	158.9	8095.63	146.334	0.0738306	0.544479	46.9162
549	8765.75	155.444	8148.23	146.701	0.0738553	0.543444	47.0857
550	8790.66	155.81	8170.66	151.201	0.0742794	0.542552	48.8647
551	8815.48	154.819	8172.47	149.26	0.0762978	0.541548	48.1779
552	8839.68	157.64	8205.93	146.78	0.0763264	0.540269	47.1768
553	8863.93	164.721	8243.72	157.811	0.0763563	0.538592	51.006
554	8888.25	158.583	8220.52	156.886	0.0764591	0.537029	50.5571
555	8912.6	154.097	8251.69	153.291	0.0769214	0.535738	49.2609
556	8936.87	150.021	8293.47	156.104	0.0769563	0.534461	50.0146
557	8961.18	150.24	8309.24	154.362	0.0769934	0.53257	48.95
558	8985.57	150.612	8349.21	152.775	0.0768689	0.530814	47.9309
559	9010.08	150.888	8388.54	161.166	0.0757937	0.529348	50.37
560	9035	151.287	8383.19	163.04	0.0758376	0.528301	50.812
561	9059.96	152.318	8403.04	160.262	0.0758838	0.527634	49.706
562	9084.94	151.17	8442.3	155.636	0.0763222	0.52726	48.012
563	9109.78	149.333	8488.94	152.581	0.0790838	0.527141	47.9393
564	9133.77	150.208	8514.13	153.336	0.0791342	0.527128	48.0774
565	9157.75	149.612	8536.43	154.371	0.0791847	0.527162	48.3006
566	9181.7	148.777	8557.66	163.324	0.0793587	0.527236	51.2031
567	9205.6	148.004	8544.77	162.284	0.0805623	0.52738	50.7332
568	9229.14	148.684	8574.74	161.466	0.0806129	0.527669	50.3581
569	9252.65	149.319	8603.43	164.655	0.0806635	0.528036	51.0258
570	9276.13	149.545	8618.75	158.873	0.0807554	0.528414	49.1517
571	9299.56	147.964	8667.27	147.83	0.0814667	0.528773	45.5307
572	9322.77	148.283	8739	159.325	0.0815174	0.529058	49.3483
573	9345.96	148.46	8713.37	169.738	0.0815681	0.529347	52.5451
574	9369.12	153.5	8695.88	162.212	0.0815874	0.529675	49.7744
575	9392.26	157.921	8756.69	155.312	0.0773124	0.530029	47.6023
576	9416.66	158.497	8809.76	156.09	0.0773621	0.530402	48.9544
577	9441.03	158.194	8816.31	154.634	0.0774116	0.530805	48.2874
578	9465.37	159.818	8848.62	158.79	0.0775023	0.531217	49.4836
579	9489.66	159.439	8856.98	166.475	0.0789619	0.531663	51.7831
580	9513.48	160.046	8851.05	162.886	0.0790106	0.532059	50.3856
581	9537.27	160.921	8892.92	157.403	0.0790587	0.532405	48.7713
582	9561.03	162.947	8937.69	149.882	0.0791067	0.532734	46.0479
583	9584.76	164.595	8997.06	150.787	0.079092	0.533018	45.5859
584	9608.48	164.511	9027.57	151.022	0.0791394	0.533407	45.4877
585	9632.17	164.99	9053.38	151.941	0.0791865	0.533863	45.5561
586	9655.82	164.882	9076.93	153.291	0.0792645	0.534352	46.0009
587	9679.43	164.635	9095.36	148.411	0.0798113	0.534866	45.8687
588	9702.86	165.059	9120.97	150.048	0.0798575	0.535313	46.264
589	9726.25	165.717	9139.39	150.278	0.0799034	0.53563	46.3201
590	9749.61	172.3	9162.29	149.448	0.0796565	0.535902	46.1449
591	9773.04	174.859	9188.18	148.553	0.0763581	0.536127	46.5731
592	9797.47	174.876	9206.33	147.981	0.0764025	0.536343	46.4473
593	9821.87	174.469	9231.21	148.748	0.0764464	0.536572	46.6525
594	9846.25	169.507	9251.88	149.285	0.0770653	0.536791	46.9468
595	9870.42	167.486	9271.41	150.147	0.0808135	0.536876	47.4008
596	9893.47	167.389	9289.05	147.891	0.0808518	0.536812	47.1736
597	9916.51	167.345	9315.27	148.072	0.0808914	0.536813	47.3337
598	9939.54	167.084	9336.47	148.668	0.0808819	0.537004	47.5913
599	9962.56	166.349	9356.23	148.235	0.0806765	0.537384	47.441
600	9985.63	166.413	9380.83	158.282	0.0807262	0.537802	48.1371
601	10008.7	165.774	9394.99	157.835	0.0807794	0.538314	47.998
602	10031.7	168.924	9420.61	158.618	0.0802368	0.538979	48.2075
603	10054.8	169.208	9441.45	158.185	0.0776459	0.540063	47.9951
604	10078.6	167.914	9467.31	159.95	0.0777097	0.541496	48.2949
605	10102.4	167.222	9485.98	159.49	0.0777668	0.543273	48.8161
606	10126.1	167.291	9501.08	159.284	0.0776377	0.545356	48.5379
607	10149.7	167.097	9526.08	160.821	0.0777107	0.547671	48.8266
608	10173.2	166.346	9543.42	160.975	0.0777816	0.550109	48.6668
609	10196.5	164.869	9566.44	163.552	0.0779297	0.552172	49.2252
610	10219.8	164.463	9580.47	164.639	0.0786104	0.553826	49.4101
611	10242.8	164.903	9599.83	164.438	0.0786593	0.554906	49.3114
612	10265.7	165.191	9623.56	164.639	0.0787009	0.555409	49.4024
613	10288.5	165.302	9645.45	165.533	0.0787987	0.555385	49.7785
614	10311.4	165.489	9664.17	164.358	0.0790921	0.555002	49.8268
615	10334.2	167.265	9687.54	164.782	0.0791162	0.554448	50.0373
616	10357	169.872	9708.87	165.168	0.0791362	0.553782	50.1751
617	10379.8	169.93	9731.25	165.875	0.0792264	0.552958	50.1792
618	10402.6	170.57	9755.54	174.374	0.0792382	0.552029	50.506
619	10425.5	171.93	9775.95	174.94	0.079246	0.551107	50.5072
620	10448.4	174.289	9801.5	174.864	0.0790511	0.550172	50.3307
621	10471.4	176.163	9829.41	174.323	0.0779958	0.549296	50.4353
622	10494.7	176.701	9853.41	167.459	0.0780029	0.548409	50.6791
623	10518.1	172.972	9875.2	167.494	0.0780954	0.547515	50.6885
624	10541.5	171.855	9899.17	167.356	0.0815356	0.54658	50.7156
625	10563.9	171.389	9922.96	167.342	0.0815437	0.545411	50.8908
626	10586.4	171.353	9945.15	166.996	0.0815522	0.544031	50.9616
627	10608.9	170.022	9968.91	166.113	0.0816778	0.542731	51.0237
628	10631.5	169.978	9992.72	166.54	0.08258	0.541525	51.4926
629	10653.9	170.822	10011.3	165.647	0.0825895	0.540453	51.1387
630	10676.3	174.435	10040	170.273	0.0825993	0.539495	51.1747
631	10698.7	188.317	10064.1	168.534	0.0807803	0.538599	50.9516
632	10721.7	193.89	10091.9	167.348	0.0733031	0.537748	50.8907
633	10747.1	193.214	10117.4	167.041	0.073314	0.536844	50.9968
634	10772.5	185.71	10140.8	167.715	0.0743253	0.53587	51.5617
635	10797.6	181.265	10158.4	166.494	0.0803276	0.534936	51.5012
636	10820.8	183.384	10183.7	166.241	0.0803397	0.53415	51.6969
637	10844.1	185.08	10205.5	163.911	0.080352	0.533429	51.5037
638	10867.5	187.264	10231.9	164.93	0.0802901	0.532743	51.9039
639	10890.9	190.11	10250.7	164.882	0.0800263	0.532082	51.9012
640	10914.3	191.928	10274.5	165.373	0.0800396	0.531528	52.0376
641	10937.8	194.703	10296.3	165.263	0.0799043	0.531104	52.0646
642	10961.4	198.274	10319.3	165.608	0.0790131	0.530813	52.0408
643	10985.3	197.749	10342.7	168.222	0.0790278	0.530604	52.7599
644	11009.1	191.145	10357.1	169.886	0.0791496	0.530447	53.2387
645	11032.9	193.305	10374.3	169.864	0.0824162	0.530337	53.2828
646	11055.8	193.613	10396.7	170.136	0.0824345	0.530482	53.3483
647	11078.7	193.31	10418.6	171.749	0.0824561	0.530836	53.7845
648	11101.5	198.857	10435.8	172.201	0.0817129	0.531218	53.6833
649	11124.5	200.578	10459.5	176.126	0.0777187	0.531701	54.0291
650	11148.7	196.987	10477.7	176.183	0.0777501	0.532249	53.8357
651	11172.9	193.836	10502.8	176.949	0.0779984	0.532949	53.8814
652	11197	193.709	10524.7	171.244	0.0801818	0.533582	54.1723
653	11220.3	194.752	10543.6	171.932	0.0802174	0.534016	54.218
654	11243.7	197.525	10565	171.361	0.08025	0.534181	53.8936
655	11267	206.832	10591.2	171.351	0.0791992	0.534189	53.8289
656	11290.7	208.277	10614.5	169.609	0.0754807	0.533882	53.7321
657	11315.5	206.163	10638.5	170.129	0.0755036	0.533148	53.83
658	11340.3	197.655	10660.6	171.125	0.0766796	0.532156	54.0716
659	11364.8	192.241	10681.3	175.504	0.0816437	0.530964	54.1647
660	11387.9	192.239	10704.2	192.393	0.0816568	0.529737	53.8554
661	11411	191.265	10733.6	194.914	0.081806	0.52845	54.3054
662	11434.1	189.8	10754.7	192.242	0.0829592	0.527095	53.904
663	11457	190.826	10787.2	180.276	0.0829625	0.525661	54.072
664	11479.9	191.4	10811	182.545	0.0829624	0.524072	54.3245
665	11502.9	192.622	10833.2	184.435	0.0826267	0.522344	54.4136
666	11526.1	198.636	10857.6	185.872	0.0814516	0.520505	54.2608
667	11549.7	201.403	10885.2	189.761	0.0814416	0.518706	54.6578
668	11573.4	199.531	10906.1	191.045	0.0816458	0.51707	54.4942
669	11597	198.402	10933.7	193.998	0.0826855	0.515286	54.7932
670	11620.5	198.14	10955.9	197.757	0.0826753	0.513228	54.9708
671	11644.1	199.047	10980.2	200.034	0.0825687	0.511137	55.4081
672	11667.8	201.881	11001.4	190.45	0.0816162	0.509121	54.6997
673	11691.8	202.754	11036.4	193.619	0.0816058	0.507241	55.4311
674	11716	204.237	11053.1	193.648	0.0815954	0.505457	55.2543
675	11740.3	205.404	11080.3	193.288	0.0812638	0.503563	54.5149
676	11764.7	209.164	11114.1	202.172	0.0801827	0.501588	54.2432
677	11789.6	211.621	11143.7	197.642	0.0801714	0.499554	53.2097
678	11814.5	207.613	11183	192.523	0.0805873	0.497509	53.2663
679	11839.5	208.276	11208.6	194.701	0.0823074	0.49542	53.9603
680	11864	210.814	11226.6	194.78	0.0822936	0.493276	54.0649
681	11888.6	220.457	11251.4	198.764	0.0813273	0.491101	54.565
682	11913.7	225.743	11271.8	209.314	0.0762328	0.488881	54.9349
683	11940.5	227.46	11294.2	208.081	0.0762163	0.486623	54.6694
684	11967.5	232.295	11325.3	205.275	0.0755898	0.484241	54.8372
685	11994.8	240.487	11351.2	192.104	0.0725153	0.481714	54.6284
686	12023.4	239.739	11380.6	192.4	0.072496	0.479193	54.8775
687	12052.2	230.955	11404.1	191.877	0.0734047	0.476841	54.9192
688	12080.8	232.666	11429.8	189.588	0.0773446	0.474591	55.0505
689	12108	237.174	11454.1	190.776	0.0773221	0.472312	55.4992
690	12135.4	247.618	11475	191.141	0.0763797	0.470133	55.0921
691	12163.2	250.895	11505.2	192.744	0.0726083	0.468074	55.9256
692	12192.7	251.06	11522	197.661	0.0726492	0.466677	56.509
693	12222.1	251.036	11540.9	202.156	0.0730907	0.465282	57.7667
694	12251.6	251.648	11552.6	201.155	0.0739731	0.463888	57.5088
695	12280.7	254.053	11581	198.934	0.0742142	0.462551	57.3998
696	12309.8	259.908	11607.6	198.051	0.0731578	0.461169	56.9408
697	12339.5	270.238	11638	198.261	0.0697528	0.459714	56.7691
698	12370.7	275.127	11665.5	201.797	0.069313	0.458226	56.5827
699	12402.1	289.612	11693.6	202.817	0.0654182	0.456684	56.7323
700	12435.6	289.365	11718.2	204.377	0.0655816	0.455172	56.8105
701	12469.1	282.018	11743.7	205.565	0.0666343	0.453615	57.4873
702	12502.2	282.499	11762.8	208.969	0.0694242	0.452097	57.5447
703	12534.1	291.284	11789.2	211.699	0.0691509	0.450711	58.0674
704	12566.1	295.283	11810.2	207.5	0.0665419	0.449413	57.453
705	12599.6	296.685	11843.9	208.394	0.0665987	0.448205	57.3681
706	12633.1	300.411	11871.1	211.666	0.0663367	0.447129	57.2983
707	12666.8	306.965	11898.1	225.225	0.0655008	0.446189	57.1451
708	12701	317.257	11927.1	226.193	0.0653943	0.445384	56.8541
709	12735.3	322.2	11958.8	229.194	0.0648704	0.444672	56.6378
710	12770	327.95	11989.7	240.247	0.0648124	0.443912	56.7604
711	12804.8	332.897	12017.8	241.576	0.0632488	0.443246	56.5251
712	12840.4	334.63	12050.6	230.861	0.0631663	0.44271	56.0559
713	12876.2	334.37	12085.8	232.965	0.0634428	0.442299	55.9338
714	12911.8	335.615	12115.1	238.524	0.0644081	0.441957	56.0711
715	12947	347.009	12141.5	250.357	0.0637733	0.441691	55.6473
716	12982.5	351.949	12175.6	251.201	0.061262	0.441514	55.1971
717	13019.4	347.575	12211.2	250.906	0.0612678	0.441369	54.7488
718	13056.4	345.638	12246.7	251.328	0.0628469	0.4412	54.8426
719	13092.5	343.637	12275	253.198	0.062706	0.440974	54.9405
720	13128.6	340.235	12303.2	257.414	0.062988	0.440677	54.7241
721	13164.7	337.49	12336	269.782	0.0639769	0.440399	54.6406
722	13200.2	338.941	12368.7	274.116	0.0636581	0.440246	54.7321
723	13235.8	343.056	12399.1	289.635	0.0628394	0.440176	54.2403
724	13272	344.63	12439.8	289.335	0.0626719	0.440194	54.3838
725	13308.2	343.902	12471.1	281.519	0.062349	0.440315	54.1452
726	13344.7	344.631	12507.3	282.659	0.0621926	0.440393	53.5471
727	13381.2	346.655	12547.5	295.603	0.0616989	0.440393	53.7703
728	13418	348.83	12576.8	295.1	0.060736	0.440373	53.2216
729	13455.4	350.627	12618.4	298	0.06039	0.440316	53.1968
730	13493	352.004	12652.5	303.61	0.0596914	0.44023	53.3054
731	13531	343.722	12685	311.253	0.0601493	0.440164	54.4136
732	13568.8	343.816	12702.7	317.891	0.0622828	0.440102	55.61
733	13605.3	347.504	12719.1	320.529	0.0620576	0.440012	55.3704
734	13641.9	348.286	12757.4	324.466	0.0608636	0.44016	55.7769
735	13679.2	348.175	12785.6	332.265	0.0607786	0.440289	55.6385
736	13716.6	349.294	12822.7	333.49	0.0602989	0.440476	55.4852
737	13754.3	349.459	12860.5	335.917	0.0593167	0.440633	55.9135
738	13792.5	344.336	12889.1	333.098	0.0598776	0.440686	56.0204
739	13830.4	344.06	12922.8	336.832	0.061593	0.440732	55.9902
740	13867.3	345.639	12958.4	351.847	0.0611617	0.440866	56.2759
741	13904.3	347.11	12989.5	351.979	0.0598464	0.441036	56.0165
742	13942.2	349.638	13030.3	345.972	0.0596423	0.439045	56.3052
743	13980.4	351.569	13066.5	345.509	0.0589094	0.436984	56.0797
744	14019.3	346.799	13110.3	342.349	0.0589727	0.434634	55.9028
745	14058.3	346.114	13154	337.309	0.0609869	0.432149	56.062
746	14096.2	346.099	13192.1	337.953	0.0608963	0.429825	56.0506
747	14134.4	345.283	13232.6	342.913	0.0613313	0.427559	55.8983
748	14172.6	345.125	13275.6	344.788	0.0625671	0.425277	56.0658
749	14210.1	349.091	13313.9	343.747	0.0619036	0.422991	55.7923
750	14248.3	352.407	13359.3	345.051	0.0600025	0.420643	55.6723
751	14288	352.695	13402.6	348.223	0.0602634	0.418239	55.5234
752	14327.6	349.911	13447.1	349.977	0.0616896	0.415827	55.6496
753	14366.6	349.984	13487.7	353.155	0.0618788	0.413466	55.573
754	14405.7	343.413	13531.9	343.538	0.0656124	0.411064	55.5799
755	14442.8	348.67	13574.4	343.858	0.0655273	0.408597	55.591
756	14480.1	349.627	13615.8	348.738	0.066378	0.406125	55.7746
757	14517.2	344.362	13654.9	348.061	0.0692518	0.403711	55.7241
758	14553	347.915	13698.1	348.264	0.0688245	0.401368	55.463
759	14589.2	352.94	13744.4	350.838	0.0654488	0.399043	55.253
760	14627.5	352.118	13790.7	344.35	0.0653916	0.396711	55.2338
761	14666	345.719	13833.7	344.036	0.0663524	0.39435	54.9969
762	14704.2	344.3	13878.8	346.192	0.0692588	0.392057	54.5181
763	14741.1	344.086	13928	347.963	0.0691501	0.389881	54.5819
764	14778.2	344.58	13969.7	352.884	0.0686843	0.387775	53.7357
765	14815.7	345.834	14025.6	346.02	0.0686581	0.385788	53.4437
766	14853.5	347.3	14072.8	346.156	0.0683251	0.383971	53.0927
767	14891.6	348.841	14119.7	346.043	0.067403	0.382267	53.1612
768	14930.4	355.09	14160.3	343.951	0.0667163	0.380681	53.3894
769	14969.8	359.288	14198	347.555	0.0634719	0.379279	53.6364
770	15011.3	365.147	14235.2	352.254	0.0633118	0.377646	53.1016
771	15053.1	369.457	14285.8	352.844	0.0603626	0.376103	53.1742
772	15097.2	369.646	14327.7	349.908	0.0603555	0.374615	53.5051
773	15141.4	368.648	14364.9	350.274	0.0607217	0.373199	53.6047
774	15185.5	368.625	14405.5	343.378	0.0615819	0.371858	54.4048
775	15229.2	371.791	14434.2	348.375	0.0612943	0.370588	55.8788
776	15273.2	374.72	14453.7	349.045	0.0605441	0.369405	56.6831
777	15317.9	376.48	14482.4	349.677	0.0603379	0.36831	58.0007
778	15362.9	377.676	14503.8	343.923	0.0596787	0.367267	58.2588
779	15408.6	373.56	14538.8	345.066	0.06054	0.366257	58.1745
780	15453.7	366.367	14578.1	352.956	0.0641895	0.365284	57.822
781	15496.3	371.354	14622.8	352.89	0.0639545	0.364368	57.3051
782	15539.2	383.495	14670.6	344.959	0.0607415	0.363521	56.7891
783	15584.5	387.771	14717.3	344.043	0.0607395	0.362754	56.1628
784	15629.9	398.864	14764.3	344.128	0.0593496	0.361223	55.695
785	15676.5	416.851	14811.3	345.661	0.0564721	0.359743	54.9486
786	15725.8	422.528	14862.3	347.644	0.0565438	0.358319	54.8994
787	15775.1	425.126	14904.3	349.362	0.0566876	0.356961	54.879
788	15824.5	431.646	14946.5	358.64	0.0571254	0.355635	55.1315
789	15873.8	433.225	14986.1	359.744	0.0580581	0.354376	55.1818
790	15922.4	438.591	15029.9	369.137	0.0578962	0.353166	55.1961
791	15971.3	445.095	15075.4	369.765	0.0575456	0.352026	55.253
792	16020.6	453.395	15121.5	369.513	0.0573588	0.351503	55.3053
793	16070.2	462.397	15166.1	367.574	0.0569534	0.351008	55.2761
794	16120.3	464.995	15211.6	370.037	0.0574884	0.351075	55.3024
795	16169.8	467.66	15254.9	374.361	0.058672	0.351193	55.3862
796	16218.3	476.842	15297.8	375.202	0.0580251	0.351374	55.0059
797	16267.4	487.088	15348.2	378.395	0.0565452	0.351605	54.7745
798	16317.7	495.125	15396.7	376.028	0.0560377	0.351911	54.4918
799	16368.4	506.152	15445.7	365.802	0.0549286	0.352262	54.4751
800	16420.1	515.738	15488.2	368.821	0.054461	0.352676	54.2519
801	16472.1	526.999	15533.5	383.005	0.0534529	0.353143	53.9694
802	16525.1	534.424	15581.8	387.14	0.0525573	0.353631	53.8714
803	16578.9	546.82	15627.6	397.955	0.0522914	0.354122	53.7573
804	16632.9	550.486	15674.8	416.654	0.0509112	0.354625	53.5484
805	16688.3	548.75	15726.3	422.587	0.0512259	0.355088	53.5264
806	16743.3	546.704	15774.8	425.083	0.0519534	0.355485	53.3348
807	16797.4	541.408	15826.5	431.908	0.0526764	0.355825	53.5257
808	16850.8	544.276	15871.5	432.976	0.0542092	0.356097	53.3354
809	16902.6	560.511	15922.7	438.631	0.0533165	0.356327	52.9827
810	16955.2	588.442	15977.2	445.89	0.0511989	0.356507	53.129
811	17010	615.167	16023.6	453.903	0.0478542	0.356652	53.1583
812	17068.6	624.255	16072.3	462.77	0.0476966	0.356716	53.7059
813	17127.4	633.387	16112.4	464.759	0.0473132	0.356717	53.7967
814	17186.6	639.117	16160.4	466.195	0.0474595	0.356631	54.4522
815	17245.7	649.558	16198	472.042	0.0473379	0.356454	54.0988
816	17305	665.453	16253.5	485.128	0.046019	0.356193	53.9692
817	17366	668.877	16306.4	492.589	0.046411	0.355841	53.9072
818	17426.5	676.021	16359.1	504.481	0.0468282	0.355393	53.8449
819	17486.6	706.506	16413	514.216	0.0437003	0.354875	53.0078
820	17551.1	693.87	16482.1	529.164	0.0445513	0.355321	53.2605
821	17614.3	730.305	16529.2	534.921	0.0462144	0.355657	53.0257
822	17675.1	742.413	16586.5	548.642	0.0431905	0.355935	52.5423
823	17740.2	748.834	16649.4	551.143	0.0430082	0.356054	52.513
824	17805.5	758.544	16704.9	547.726	0.0427891	0.356013	52.2361
825	17871.1	773.075	16765.1	546.121	0.0426436	0.355777	52.1445
826	17937	792.271	16821.3	537.92	0.0421827	0.355452	51.9899
827	18003.7	816.048	16877.7	550.092	0.0411144	0.35509	51.8814
828	18072.2	829.442	16933	573.249	0.0393914	0.354731	51.7492
829	18143.8	833.746	16990.4	612.505	0.0395206	0.35434	51.8502
830	18215.2	836.605	17046.8	620.169	0.0401475	0.35394	51.8619
831	18285.6	847.501	17106.4	631.339	0.0406271	0.353556	51.936
832	18355.2	880.431	17165.2	637.088	0.040218	0.353197	51.9876
833	18425.6	879.981	17224.3	642.682	0.0388906	0.352847	51.6719
834	18498.4	880.039	17291.2	664.192	0.0383939	0.352729	51.6343
835	18572.3	881.66	17353	669.853	0.0413073	0.352547	51.948
836	18641	909.819	17407.5	665.758	0.0398535	0.352393	51.2036
837	18712.2	925.983	17484	707.022	0.0375679	0.352229	51.0462
838	18787.7	929.256	17552.4	693.622	0.03716	0.352059	50.7934
839	18864.2	942.862	17621.4	734.549	0.0382846	0.351835	50.6558
840	18938.4	957.075	17686.7	744.105	0.0381493	0.351577	50.6084
841	19013	971.636	17753.7	750.031	0.0380967	0.35127	50.1534
842	19087.7	985.167	17830.6	762.675	0.0380436	0.350939	50.4099
843	19162.6	980.763	17891.5	778.304	0.0380904	0.350577	50.5302
844	19237.5	1019.48	17956	798.107	0.0380449	0.34839	50.521
845	19312.9	1032.87	18031	826.333	0.0374995	0.346228	50.3499
846	19389.9	1028.42	18112.8	832.509	0.037389	0.344082	50.3073
847	19467.7	1041.6	18193.1	835.717	0.037466	0.341989	50.4068
848	19545.7	1058.41	18268.8	838.755	0.0371744	0.339874	50.2862
849	19624.9	1083.8	18348.8	880.472	0.0357261	0.337765	49.508
850	19707.7	1100.37	18445.8	879.851	0.035398	0.335635	47.8056
851	19791.9	1113.52	18568.9	880.29	0.0351485	0.333524	46.471
852	19877.2	1119.41	18676.6	924.443	0.0354313	0.331455	44.7024
853	19962.4	1123.73	18801.7	929.863	0.0359271	0.32942	45.3369
854	20046.9	1132.07	18869	943.868	0.0356358	0.327413	45.5163
855	20132.6	1136.1	18945.7	958.456	0.0354585	0.325429	45.9155
856	20219.2	1138.03	19017.3	972.481	0.0355984	0.323476	46.2545
857	20306.1	1143.44	19090.5	985.676	0.0356654	0.32153	46.5811
858	20393.3	1163.8	19164.3	980.647	0.0352679	0.319598	47.0015
859	20482	1176.14	19235.9	1019.19	0.0340747	0.317738	47.1242
860	20574.4	1167.25	19315	1033.23	0.0328064	0.316126	47.3498
861	20670.8	1165.11	19392.4	1028.26	0.0332847	0.314771	47.7847
862	20766.2	1161.19	19464.5	1040.94	0.0331678	0.313611	48.0994
863	20862.4	1156.96	19539.1	1056.19	0.0329208	0.312382	48.4152
864	20959.6	1148.42	19615.1	1081.8	0.0327851	0.310933	48.6764
865	21057.7	1145.31	19696.5	1098.4	0.0330972	0.309462	49.1164
866	21155.3	1146.46	19775.1	1112.23	0.0325594	0.307979	49.3221
867	21255.1	1145.43	19861	1118.82	0.0316918	0.306633	49.5247
868	21358	1138.88	19946.5	1121.96	0.031379	0.305536	49.8579
869	21462.3	1132.06	20027.1	1130.96	0.0314656	0.304567	50.1507
870	21566.6	1123.01	20109.1	1135.58	0.0312578	0.303349	50.0986
871	21672.1	1107.32	20202.1	1137.64	0.0317689	0.302105	50.2274
872	21776.3	1094.56	20291	1139.66	0.0322067	0.300853	50.3513
873	21879.5	1083.59	20380.3	1162	0.0320766	0.299342	50.0476
874	21983.6	1057.3	20483.7	1176.38	0.0326604	0.297907	50.3511
875	22086.4	1042.64	20574.4	1167.25	0.0332045	0.296635	50.3201
876	22187.9	1030.99	20677.8	1164.96	0.0339504	0.295316	50.4355
877	22287.7	1023.46	20776.4	1160.75	0.0338172	0.294209	50.2779
878	22388.2	1017.1	20882.6	1156.07	0.0334718	0.29318	50.3085
879	22490.1	1008.44	20984.2	1145.98	0.0331952	0.292008	50.226
880	22593.2	996.688	21090.3	1145.02	0.0329314	0.290749	50.2168
881	22697.7	985.196	21195.2	1147.34	0.0332281	0.289795	50.2777
882	22801.5	980.038	21299.3	1144.02	0.0335031	0.288383	50.3064
883	22905	977.138	21409.3	1134.38	0.0330743	0.286959	50.1768
884	23010.4	968.16	21525	1129.32	0.0327129	0.285875	50.2747
885	23117.3	959.809	21632.8	1112.98	0.0329009	0.284292	50.255
886	23224.2	947.383	21746.4	1096.6	0.0328461	0.283111	50.1436
887	23331.8	934.821	21859.2	1088.92	0.033223	0.281207	50.1064
888	23438.8	914.173	21974.2	1058.64	0.0336265	0.279528	49.9842
889	23545.2	892.546	22089.2	1042.24	0.0340665	0.277739	50.1478
890	23650.9	875.985	22195.1	1030.17	0.0337006	0.27621	49.7466
891	23758.3	864.054	22313.7	1021.57	0.0330818	0.275081	49.6671
892	23868.2	870.848	22422.6	1015.03	0.0331659	0.274239	50.0012
893	23978.2	873.881	22519.8	1005.55	0.0324763	0.273044	49.8717
894	24090.9	849.825	22633.2	991.868	0.0319038	0.272168	50.0108
895	24206.1	823.473	22738	981.019	0.0330525	0.271207	50.3527
896	24317.6	810.132	22837.1	979.487	0.034516	0.269976	50.6522
897	24425	820.923	22939.3	975.953	0.0342883	0.268865	50.8095
898	24533.4	818.808	23046.7	964.186	0.0338049	0.268091	50.8645
899	24643.8	804.616	23156.2	957.4	0.0336473	0.267695	51.2332
900	24754.8	797.373	23254.9	942.869	0.033656	0.267137	51.2522
901	24866	751.027	23364.8	931.362	0.0344442	0.266298	51.5318
902	24975	729.332	23468.3	907.323	0.0353608	0.265656	50.5817
903	25081.5	736.274	23604.7	881.118	0.0364041	0.264788	48.2557
904	25185.2	749.366	23782.8	861.339	0.0360688	0.263953	47.0933
905	25290.3	759.392	23930.8	877.818	0.035509	0.263276	48.0199
906	25397.2	751.049	24018.5	870.527	0.0356269	0.262884	47.0757
907	25504	761.368	24162.9	829.273	0.0352331	0.262884	45.8774
908	25612	762.405	24310.9	809.412	0.0345956	0.261859	46.3742
909	25722.4	748.131	24409.6	819.946	0.0342858	0.261098	47.3008
910	25834.1	738.656	24495.5	825.397	0.0343439	0.259992	47.5492
911	25946.1	720.674	24603.8	806.603	0.035468	0.258739	46.5361
912	26055	708.189	24750.3	799.324	0.0357719	0.257529	46.8451
913	26163.6	713.559	24858.9	752.442	0.035647	0.256821	46.4134
914	26272.8	732.986	24983.6	727.636	0.034866	0.256869	45.91
915	26384.5	724.163	25103	738.17	0.0346689	0.256933	46.5358
916	26496.7	702.773	25189.8	749.988	0.0347767	0.256795	47.4109
917	26608.7	694.839	25271.9	761.707	0.0360707	0.256441	47.6295
918	26716.8	693.857	25374.3	748.796	0.0359282	0.256086	46.9345
919	26825.5	694.685	25502	761.348	0.0352893	0.255827	46.8441
920	26936.3	697.836	25613.7	762.422	0.0351486	0.255703	47.2979
921	27047.5	691.534	25712	749.013	0.0356226	0.25427	45.9569
922	27157.9	686.511	25869.3	735.668	0.035439	0.252967	46.6619
923	27269.5	686.966	25967.4	716.5	0.0350371	0.252093	45.8862
924	27382.7	693.798	26102	703.736	0.0353324	0.251108	45.2329
925	27495.4	667.84	26233.7	724.734	0.0367386	0.249913	46.3394
926	27604.3	643.08	26319.6	742.853	0.0384446	0.248542	47.7863
927	27709	645.245	26398.3	720.18	0.040161	0.247836	46.4595
928	27809.5	668.008	26551.1	693.157	0.0388948	0.247596	46.2286
929	27913.3	702.21	26668.6	696.589	0.0385095	0.247629	46.5036
930	28018.2	664.828	26769.5	690.874	0.0400155	0.247918	45.5076
931	28119	660.184	26905	700.092	0.0405714	0.248028	46.3081
932	28218.3	681.353	26993.5	693.705	0.0407079	0.247878	46.4018
933	28317.4	707.775	27102.5	689.325	0.0393367	0.24774	45.825
934	28420.1	717.162	27230.1	682.844	0.0383076	0.247828	45.0155
935	28525.4	690.973	27365	696.977	0.0383158	0.249569	45.8666
936	28630	668.736	27445	682.583	0.038949	0.251459	46.029
937	28732.1	657.2	27541.8	654.272	0.0407811	0.253318	45.4545
938	28828.9	638.369	27655.2	633.988	0.0414925	0.255077	45.5595
939	28923.4	655.14	27747	653.203	0.0425753	0.256754	45.5804
940	29014.8	663.232	27840.3	675.326	0.0429135	0.257766	47.0775
941	29105.2	665.27	27899.3	711.868	0.042787	0.258556	49.1243
942	29195.6	680.64	27944.6	680.629	0.0427158	0.259501	48.5741
943	29285.8	680.675	28058	656.275	0.0421312	0.260512	47.3699
944	29377	685.48	28184.5	664.385	0.0417718	0.261427	48.1783
945	29468.5	680.23	28258.5	701.479	0.0415479	0.262228	49.3362
946	29560.3	621.928	28323.9	708.461	0.0439182	0.26299	49.8619
947	29646.9	645.482	28408.4	720.056	0.0463128	0.263643	49.3734
948	29728.8	655.569	28523.6	691.353	0.0437071	0.264127	48.4563
949	29815.4	685.308	28650.5	664.363	0.0427294	0.264449	48.3515
950	29903.9	688.314	28752.7	655.385	0.0416126	0.265104	48.4272
951	29994.6	671.953	28844.1	634.954	0.0420005	0.265993	48.0134
952	30084.1	681.686	28944.3	660.475	0.041935	0.266709	49.4735
953	30173.5	695.93	28997	664.035	0.0402446	0.26547	50.0847
954	30267.1	705.711	29078.5	660.37	0.03878	0.264523	49.3724
955	30364.6	691.318	29190.2	680.825	0.0388492	0.263871	50.7293
956	30462.1	663.901	29251	678.755	0.0396079	0.263426	49.7239
957	30558	645.114	29368	685.206	0.0391448	0.263205	49.8318
958	30655	626.028	29457.9	687.952	0.039874	0.262776	49.8219
959	30750.4	625.698	29551.9	619.631	0.041144	0.262048	49.0498
960	30843.2	625.765	29658.9	648.749	0.0402334	0.26141	48.752
961	30938.3	627.817	29750.9	657.73	0.0400746	0.260827	48.3572
962	31034	641.362	29849.7	699.964	0.0401819	0.260236	52.0619
963	31129.6	648.827	29855.4	701.538	0.0389292	0.259104	51.1042
964	31228.7	645.299	29972.7	669.575	0.0389373	0.257178	49.2891
965	31328.6	627.382	30113	684.835	0.0408685	0.255032	48.7783
966	31424.5	633.686	30225.9	705.55	0.0416329	0.252526	49.156
967	31519.6	648.853	30324.3	705.935	0.0403803	0.249854	49.9911
968	31618.8	668.725	30414.3	673.28	0.039807	0.247658	48.3582
969	31720.2	664.354	30560.3	644.663	0.0401427	0.246003	47.4034
970	31821.5	654.881	30687.3	619.673	0.0403207	0.244979	47.0772
971	31922.7	640.201	30793.8	629.832	0.0407374	0.24461	47.3054
972	32023.1	624.279	30884	622.412	0.0420758	0.244675	46.5454
973	32120.2	603.082	30996.8	633.637	0.0431137	0.244525	47.5968
974	32215	573.204	31068.5	648.545	0.0445989	0.246311	46.9513
975	32306.1	557.501	31172.7	649.026	0.0460962	0.24812	46.4754
976	32393.5	564.541	31275.5	642.184	0.0453014	0.249445	47.4924
977	32482	574.676	31343.3	623.282	0.0442433	0.249429	46.1132
978	32572.6	579.321	31471.9	639.754	0.0443917	0.248832	45.6072
979	32663.1	572.968	31584.2	661.16	0.0445571	0.248404	46.3567
980	32753.5	576.419	31667.9	679.494	0.0441719	0.248169	47.9903
981	32844.7	585.821	31729.3	661.705	0.0435842	0.248133	46.6221
982	32937.2	596.226	31865.1	651.645	0.0431873	0.248292	46.1794
983	33030.4	615.24	31976.3	629.545	0.04262	0.248255	45.8782
984	33125	642.664	32082.4	617.602	0.0406044	0.247975	46.0905
985	33224.3	644.623	32174.3	582.306	0.0391028	0.246529	45.3056
986	33328	616.678	32290.7	556.298	0.0416743	0.244733	45.2187
987	33426.1	580.972	32387.7	563.875	0.0442913	0.243263	44.9334
988	33518.9	561.704	32488.3	575.397	0.0457777	0.242104	46.6018
989	33609.1	558.327	32547	583.376	0.0475581	0.24128	48.0893
990	33696.2	583.269	32608.6	573.627	0.0465127	0.240938	47.4715
991	33785.5	607.706	32713.9	572.355	0.0460773	0.240659	46.7986
992	33875.7	613.776	32820.8	583.333	0.0466198	0.240741	47.2182
993	33964.8	616.398	32903.2	591.9	0.0453716	0.241017	47.5228
994	34056.2	623.964	32988.1	602.714	0.044994	0.240998	47.7589
995	34148.4	614.476	33076.8	628.952	0.0458508	0.240916	47.4977
996	34239	612.913	33180.3	658.41	0.0453613	0.241135	47.6322
997	34330.4	618.154	33277.6	627.906	0.0445831	0.241593	47.6115
998	34423.2	624.142	33376.8	605.813	0.0448236	0.242179	48.1247
999	34515.3	621.661	33458.1	564.822	0.0448567	0.242817	45.4709
1000	34607.1	614.3	33605.4	557.266	0.0440145	0.243517	45.09
1001	34700.4	604.593	33698	583.775	0.0442708	0.244324	47.3388
1002	34792.9	599.531	33735	603.82	0.0455233	0.24535	48.4156
1003	34882.4	597.459	33796.4	608.547	0.0456292	0.24693	48.7287
1004	34971.2	586.322	33872.7	613.836	0.0460102	0.248139	49.9205
1005	35058.8	599.247	33930.3	612.665	0.0466453	0.24896	48.8083
1006	35144.9	590.527	34042.4	624.793	0.0472689	0.249938	49.8365
1007	35229.5	592.467	34106.4	620.96	0.0481921	0.250652	50.6006
1008	35312.3	611.077	34177.1	610.055	0.048398	0.251285	49.0888
1009	35394.5	611.1	34299.7	615.722	0.0484119	0.251764	48.9394
1010	35476.6	619.958	34393.4	623.153	0.048964	0.252047	50.2087
1011	35557.6	625.242	34455	625.196	0.0488041	0.252176	50.8051
1012	35638.9	630.388	34532.6	620.649	0.0479494	0.252097	49.9104
1013	35721.6	620.897	34646.1	610.98	0.0484891	0.252294	49.7387
1014	35803.3	629.207	34742.2	599.689	0.0485104	0.252967	50.249
1015	35884.8	645.9	34818.7	599.45	0.0471485	0.253315	50.3493
1016	35968.6	655.397	34904.2	596.777	0.0466624	0.254149	50.096
1017	36052.9	647.558	34994.7	582.654	0.0469146	0.255365	48.8598
1018	36136.3	650.262	35103.8	610.903	0.0459194	0.257118	50.73
1019	36221	668.103	35141.1	590.441	0.0452396	0.259258	49.8997
1020	36306.3	660.873	35234.8	592.587	0.0449187	0.261132	49.7128
1021	36391.6	661.602	35313.8	611.437	0.0443588	0.263037	50.7591
1022	36477.3	653.689	35365.6	607.064	0.0442724	0.264573	49.8637
1023	36562.6	633.897	35460.8	620.349	0.0442414	0.265674	51.4092
1024	36647.7	608.821	35504.3	619.274	0.0454241	0.26578	51.1497
1025	36730.5	587.107	35590.6	628.928	0.0472187	0.265611	51.2368
1026	36810.3	576.366	35671.2	631.365	0.0482502	0.266168	52.2207
1027	36888.1	563.835	35729.8	619.19	0.0485806	0.266783	51.5695
1028	36965.3	550.842	35823.1	631.895	0.0487603	0.267659	51.5053
1029	37041.9	547.1	35902.8	649.967	0.0483972	0.268756	52.9706
1030	37118.8	543.462	35948.8	657.943	0.0476833	0.269715	52.9919
1031	37196.6	535.257	36028.2	647.719	0.0479826	0.270279	52.4386
1032	37273.7	540.862	36121.9	647.106	0.0487376	0.269947	51.9359
1033	37349.7	551.343	36219.4	668.4	0.0481195	0.270862	53.6097
1034	37426.4	547.264	36261.9	660.915	0.0467286	0.273323	52.675
1035	37504.7	537.19	36357.7	660.825	0.0469104	0.276669	52.1028
1036	37581.7	523.184	36441.7	662.752	0.0479168	0.279791	52.3954
1037	37656.3	517.021	36506.3	646.291	0.049185	0.281974	51.2688
1038	37728.4	503.268	36608.9	623.722	0.0502038	0.283373	50.9908
1039	37798.7	497.841	36693.3	591.322	0.0509105	0.284299	50.3661
1040	37867.8	491.399	36784.8	580.96	0.0517867	0.283223	51.4106
1041	37936	492.56	36844.5	570.188	0.0521497	0.281969	51.6787
1042	38004	483.387	36921.2	559.027	0.0524129	0.280358	51.9759
1043	38072.1	488.219	36998.1	544.755	0.0536878	0.278783	51.4317
1044	38138.9	480.301	37092.8	549.822	0.0559658	0.279326	51.879
1045	38202.8	476.332	37158.4	533.788	0.0575346	0.281083	50.4063
1046	38264.7	472.387	37260.7	537.723	0.0579554	0.282214	51.2517
1047	38325.8	475.201	37314.4	550.711	0.0574603	0.283084	51.7504
1048	38387.3	486.925	37376.6	551.824	0.0549136	0.284036	50.4154
1049	38451.4	484.435	37479.7	542.392	0.0536501	0.284432	49.9187
1050	38516.9	483.885	37566.5	524.358	0.0552302	0.284178	49.3932
1051	38580.7	479.572	37653.6	517.665	0.0556567	0.283632	50.3012
1052	38644	484.448	37709.2	504.53	0.0549399	0.282791	50.0952
1053	38708.4	485.198	37787	499.429	0.0559404	0.281761	50.5162
1054	38771.8	484.417	37851.7	490.655	0.0577361	0.280635	50.3055
1055	38833.5	489.847	37928	494.174	0.0577135	0.27979	50.9112
1056	38895.5	486.612	37987.4	482.206	0.0557245	0.278956	50.1845
1057	38959.8	484.378	38072.1	488.222	0.0547104	0.278151	50.7071
1058	39025.5	481.174	38131.9	480.799	0.0558605	0.277345	51.6339
1059	39090	489.358	38182.3	477.192	0.056335	0.27651	52.5058
1060	39154.2	492.474	38232.6	475.082	0.0558262	0.275357	52.5043
1061	39219.3	502.718	38297.9	469.599	0.055266	0.273935	51.2539
1062	39285.3	501.932	38384.8	487.021	0.054017	0.272374	50.2304
1063	39353.3	497.66	38472.3	483.625	0.0534071	0.270488	51.1014
1064	39422.5	501.634	38528.3	483.951	0.0530428	0.268418	51.2784
1065	39492.8	501.311	38595.6	478.322	0.0522548	0.266832	49.4788
1066	39564.5	496.592	38695.3	490.945	0.0522352	0.265456	51.4626
1067	39636.6	500.252	38729.9	475.715	0.0525038	0.264213	50.6098
1068	39708.7	519.531	38810.6	492.463	0.0497374	0.262793	52.4055
1069	39785.2	504.618	38847.7	488.237	0.0492667	0.261154	49.9704
1070	39862.9	479.42	38956.6	484.535	0.0497442	0.26006	49.6788
1071	39940.2	449.468	39030.7	480.921	0.0529514	0.259008	49.8257
1072	40013.1	439.9	39096.1	490.223	0.0554848	0.258534	50.9117
1073	40082.9	450.581	39143.8	490.833	0.0557123	0.258192	49.9653
1074	40152.4	443.413	39225.9	503.751	0.0553385	0.257469	50.4788
1075	40222.6	440.203	39285.6	501.925	0.0549653	0.25645	49.9184
1076	40293.5	435.667	39367.1	496.795	0.0553412	0.2548	49.2752
1077	40364.4	429.078	39453.8	504.358	0.0561611	0.253273	49.436
1078	40434.7	435.043	39527.1	498.626	0.0561944	0.251691	48.7563
1079	40505.4	457.647	39617	493.732	0.0539241	0.249819	48.5317
1080	40579.7	451.707	39699.8	521.276	0.0543074	0.247606	48.385
1081	40654	460.324	39786.7	504.321	0.0532122	0.245306	47.4998
1082	40730.6	467.895	39889.8	470.628	0.0524856	0.24414	47.0809
1083	40808.7	467.496	39977.1	433.989	0.0536056	0.242632	45.4709
1084	40885.6	459.573	40080.6	450.959	0.0529778	0.240359	48.104
1085	40964.1	460.275	40113.3	445.537	0.0529937	0.237099	48.1189
1086	41043.7	457.804	40193.9	441.158	0.0530121	0.233914	48.2931
1087	41124.3	444.397	40272.5	438.543	0.0548123	0.232838	48.4591
1088	41202.7	426.568	40344.3	428.716	0.0562991	0.232503	48.0099
1089	41279.1	427.839	40423.3	430.139	0.0571538	0.232394	48.0577
1090	41354.4	445.472	40493.5	460.298	0.0560908	0.232869	49.0374
1091	41430.9	450.141	40548.5	448.047	0.0547805	0.232931	47.6134
1092	41509.3	456.959	40647.3	459.658	0.0542881	0.232583	46.9221
1093	41588.5	464.754	40737.4	468.564	0.053262	0.232055	47.6041
1094	41669.4	453.673	40805	467.873	0.0540333	0.230641	47.3773
1095	41749.6	456.281	40891.3	458.983	0.0546449	0.2273	46.1576
1096	41830.2	471.884	41004.6	460.994	0.054131	0.22381	46.0786
1097	41912.7	493.235	41099.1	453.286	0.0513694	0.220196	46.9501
1098	42001.1	507.285	41176.2	426.127	0.0512799	0.216451	46.1944
1099	42091.2	511.597	41279.2	427.84	0.0510105	0.214169	46.7277
1100	42182.7	505.23	41353.8	445.438	0.0512537	0.213366	47.9205
1101	42274.2	500.772	41413.7	448.97	0.0518373	0.212379	47.6579
1102	42365	495.296	41499.8	454.83	0.0537421	0.211294	48.5959
1103	42453.1	517.598	41567.3	469.919	0.0542688	0.210788	49.4864
1104	42540.5	519.839	41634.5	453.557	0.0516877	0.210342	48.4194
1105	42632.5	529.863	41734.8	453.891	0.0513785	0.209843	48.8563
1106	42725.2	540.766	41809.9	465.995	0.0514384	0.210017	48.8081
1107	42817.8	551.033	41892	489.828	0.0519848	0.210124	47.9969
1108	42909.3	546.826	41993.6	506.56	0.0541829	0.210176	48.8931
1109	42997.1	560.984	42066.3	513.549	0.0524421	0.210278	48.8699
1110	43087.8	569.346	42157.4	506.397	0.0516037	0.210529	48.0303
1111	43179.9	566.003	42264	501.481	0.0533706	0.21084	47.5515
1112	43268.7	576.365	42362.7	494.627	0.0545688	0.211173	47.9494
1113	43355.5	601.842	42442	517.314	0.0536766	0.211634	47.0955
1114	43443.6	614.114	42543.5	519.916	0.0538934	0.212099	47.4796
1115	43531	631.127	42626	529.182	0.0529179	0.212473	47.5247
1116	43620	643.539	42716.2	538.673	0.0523607	0.21295	47.8899
1117	43709.7	641.184	42799.4	557.902	0.0526568	0.213404	49.6975
1118	43798.7	645.339	42853.9	537.514	0.0535523	0.213759	48.7587
1119	43886	633.286	42960	555.341	0.0539201	0.214075	48.3739
1120	43972.6	632.716	43055.6	569.87	0.0536977	0.215132	48.1643
1121	44059.2	642.319	43146.6	568.391	0.0524589	0.216319	48.5325
1122	44147.3	641.217	43224.4	562.807	0.0527482	0.217585	47.7866
1123	44234.5	639.164	43321	592.363	0.0528217	0.218854	49.1206
1124	44321	649.334	43377.5	607.882	0.0508564	0.220214	49.8654
1125	44410.3	645.669	43445.2	614.271	0.0516907	0.221593	48.5196
1126	44497.6	634.001	43553.1	635.466	0.0524879	0.222872	49.303
1127	44583	630.812	43621	643.666	0.0528617	0.224061	50.029
1128	44667.5	638.906	43690.9	639.761	0.0521581	0.225135	49.2986
1129	44752.6	632.786	43789.9	647.254	0.0524411	0.225975	50.5674
1130	44837	628.23	43848.7	634.445	0.0532105	0.22673	49.2365
1131	44919.9	622.193	43958.5	631.034	0.0530155	0.227325	48.6838
1132	45002.9	602.751	44053.4	642.312	0.0577966	0.227485	49.0356
1133	45078.9	607.671	44133.7	642.415	0.0574941	0.227636	49.5489
1134	45155.3	614.394	44210.1	635.705	0.0567027	0.228018	48.8968
1135	45232.7	601.8	44308	649.633	0.0563528	0.229405	48.5758
1136	45310	600.57	44397.4	647.567	0.0569294	0.23162	49.0498
1137	45385.9	594.385	44466	637.403	0.0564493	0.232874	48.641
1138	45462	575.18	44555.1	627.791	0.0567481	0.233871	47.8028
1139	45537.3	574.464	44652.3	638.293	0.0598499	0.234913	48.6064
1140	45608.4	572.368	44717	640.907	0.0596194	0.23598	49.2259
1141	45679.5	570.672	44785	625.403	0.0596617	0.236481	47.8379
1142	45750.4	574.638	44894	631.327	0.0593028	0.237208	48.5715
1143	45821.5	566.798	44959.6	608.205	0.0576332	0.238032	48.9627
1144	45894.4	566.042	45029.1	599.441	0.0580287	0.238697	47.2126
1145	45966.6	565.888	45134.8	616.894	0.0581489	0.239685	49.9757
1146	46038.3	564.705	45157	614.192	0.0580761	0.240558	49.8437
1147	46109.9	560.522	45233.4	601.678	0.0580538	0.241258	49.0359
1148	46181.3	558.972	45322.9	600.384	0.0592938	0.241843	49.3506
1149	46251	560.244	45390.8	593.915	0.0597913	0.241819	49.4037
1150	46320.2	559.35	45466	574.124	0.0605194	0.241157	48.8375
1151	46388.7	560.283	45553.1	574.539	0.0610024	0.240146	50.2636
1152	46457	563.328	45603.4	572.509	0.0613122	0.238858	50.4343
1153	46525.2	566.117	45676.2	570.47	0.0606472	0.23754	50.638
[truncated: 285 more rows]

## Sheet: NGRIP
NGRIP
[truncated: 3,076 more rows]
